# Supplementary material for: Surface Proteome of Extracellular Vesicles and Correlation Analysis Reveal Breast Cancer Biomarkers
Source: Cancers (Basel). 2024 Jan 25;16(3):520. doi: 10.3390/cancers16030520 (PMC10854524; doi:10.3390/cancers16030520)
Supplement: Supplementary file 1 [file cancers-16-00520-s001.zip › Supplementary tables.xlsx]

## Sheet: Description
	Table S1 Total proteomics MaxQuant proteinGroups output file used for cluster analysis.
	Table S2 Identified EV proteins not previously reported in Vesiclepedia or ExoCarta.
	Table S3 List of cell line-specific sEV proteins identified from global proteomics profiling. Single- and multi-pass transmembrane proteins are annotated based on UniProt subcellular locations. Values correspond to fraction of identifications from 12 replicates.
	Table S4 Source data for correlation matrix of MDA-MB-231 sEVs (Figure S4). Only proteins with complete LFQ intensities in all 12 replicates were considered. Pairwise Pearson correlation coefficients were sorted based on Euclidean distance and complete-linkage clustering.
	Table S5 Source data for correlation matrix of MCF7 sEVs (Figure S4). Only proteins with complete LFQ intensities in all 12 replicates were considered. Pairwise Pearson correlation coefficients were sorted based on Euclidean distance and complete-linkage clustering.
	Table S6 Source data for correlation matrix of MCF10A sEVs (Figure S4). Only proteins with complete LFQ intensities in all 12 replicates were considered. Pairwise Pearson correlation coefficients were sorted based on Euclidean distance and complete-linkage clustering.
	Table S7 List of identified surface-accessible proteins identified using a biotinylation labelling approach.
	Table S8 Identified surface-accessible proteins not previously reported in Vesiclepedia or ExoCarta.
	Table S9 Identified surface-accessible proteins common to sEVs and mEVs from MDA-MB-231 and MCF7 and absent in MCF10A.

## Sheet: Tab. S1
Protein IDs	Majority protein IDs	Peptide counts (all)	Peptide counts (razor+unique)	Peptide counts (unique)	Protein names	Gene names	Fasta headers	Number of proteins	Peptides	Razor + unique peptides	Unique peptides	Peptides CF10A_01	Peptides CF10A_02	Peptides CF10A_03	Peptides CF10A_04	Peptides CF10A_05	Peptides CF10A_06	Peptides CF10A_07	Peptides CF10A_08	Peptides CF10A_09	Peptides CF10A_10	Peptides CF10A_11	Peptides CF10A_12	Peptides CF7_01	Peptides CF7_02	Peptides CF7_03	Peptides CF7_04	Peptides CF7_05	Peptides CF7_06	Peptides CF7_07	Peptides CF7_08	Peptides CF7_09	Peptides CF7_10	Peptides CF7_11	Peptides CF7_12	Peptides DA_01	Peptides DA_02	Peptides DA_03	Peptides DA_04	Peptides DA_05	Peptides DA_06	Peptides DA_07	Peptides DA_08	Peptides DA_09	Peptides DA_10	Peptides DA_11	Peptides DA_12	Peptides V_01	Peptides V_02
A0FGR8	A0FGR8	5	5	5	Extended synaptotagmin-2	ESYT2	Extended synaptotagmin-2	1	5	5	5	1	2	2	0	0	0	2	2	2	1	1	2	2	2	2	2	1	2	1	1	1	3	2	1	2	2	1	0	1	0	1	2	1	2	1	0	1	1
A1KXE4	A1KXE4	1	1	1	Myelin-associated neurite-outgrowth inhibitor	FAM168B	Myelin-associated neurite-outgrowth inhibitor	1	1	1	1	0	1	1	1	1	1	0	1	0	1	1	1	0	0	1	1	0	1	0	0	0	1	0	0	0	0	0	0	0	0	0	0	0	0	0	0	0	0
A1L0T0	A1L0T0	3	3	3	Acetolactate synthase-like protein	ILVBL	2-hydroxyacyl-CoA lyase 2	1	3	3	3	0	0	1	1	0	1	2	2	1	0	1	0	3	2	2	3	2	2	2	2	3	3	2	2	1	1	0	0	0	0	0	1	0	1	0	0	2	2
A3KMH1	A3KMH1	3	3	3	von Willebrand factor A domain-containing protein 8	VWA8	von Willebrand factor A domain-containing protein 8	1	3	3	3	0	0	0	0	0	0	0	0	0	0	0	0	0	0	0	0	0	0	0	0	0	0	0	0	0	0	0	0	0	0	0	0	0	0	0	0	2	0
A4D1S0	A4D1S0	1	1	1	Killer cell lectin-like receptor subfamily G member 2	KLRG2	Killer cell lectin-like receptor subfamily G member 2	1	1	1	1	1	1	1	1	1	1	1	1	1	1	1	1	0	0	0	0	0	0	0	0	0	0	0	0	0	0	0	0	0	0	0	0	0	0	0	0	0	0
A4D2G3	A4D2G3	1	1	1	Olfactory receptor 2A25	OR2A25	Olfactory receptor 2A25	1	1	1	1	1	1	1	1	1	1	1	1	1	1	1	1	1	1	1	1	0	1	1	1	0	1	0	1	0	0	0	0	0	0	0	0	0	0	0	0	0	0
A5D8V6	A5D8V6	6	6	6	Vacuolar protein sorting-associated protein 37C	VPS37C	Vacuolar protein sorting-associated protein 37C	1	6	6	6	6	5	5	4	5	5	5	5	6	4	6	6	5	4	5	5	5	4	5	4	4	5	5	4	3	5	4	5	5	4	4	2	3	5	4	5	1	0
A5YKK6	A5YKK6	1	1	1	CCR4-NOT transcription complex subunit 1	CNOT1	CCR4-NOT transcription complex subunit 1	1	1	1	1	0	0	0	0	0	0	0	1	0	0	0	0	1	1	1	1	1	1	1	1	1	1	1	0	0	0	0	0	0	0	1	0	0	0	0	0	0	1
A6NHL2	A6NHL2	5	1	1	Tubulin alpha chain-like 3	TUBAL3	Tubulin alpha chain-like 3	1	5	1	1	4	4	4	3	3	3	4	4	3	3	4	3	5	3	4	5	5	3	5	4	5	5	4	3	4	4	4	4	4	4	4	4	4	4	3	5	1	2
A6NHR9	A6NHR9	9	9	9	Structural maintenance of chromosomes flexible hinge domain-containing protein 1	SMCHD1	Structural maintenance of chromosomes flexible hinge domain-containing protein 1	1	9	9	9	0	2	1	1	0	0	2	1	1	2	2	1	7	7	7	6	6	4	6	2	8	5	5	5	1	1	2	2	1	1	2	1	1	1	1	1	0	0
A8MVW0	A8MVW0	3	2	2	Protein FAM171A2	FAM171A2	Protein FAM171A2	1	3	2	2	2	2	2	2	2	2	2	3	2	2	2	2	0	0	1	0	0	0	0	0	0	0	0	0	0	0	0	0	0	0	0	0	0	0	0	0	0	0
A8MXV4	A8MXV4	4	4	4	Nucleoside diphosphate-linked moiety X motif 19, mitochondrial	NUDT19	Nucleoside diphosphate-linked moiety X motif 19	1	4	4	4	0	0	0	0	0	0	0	0	0	0	0	0	0	0	0	0	0	0	0	0	0	0	0	0	0	0	0	0	0	0	0	0	0	0	0	0	3	0
Q99613;B5ME19	Q99613;B5ME19	4;4	4;4	4;4	Eukaryotic translation initiation factor 3 subunit C;Eukaryotic translation initiation factor 3 subunit C-like protein	EIF3C;EIF3CL	Eukaryotic translation initiation factor 3 subunit C;Eukaryotic translation initiation factor 3 subunit C-like protein	2	4	4	4	2	2	1	0	1	2	2	3	3	1	3	1	1	1	1	2	2	1	1	1	1	1	1	1	4	3	2	3	3	2	4	1	4	2	4	4	0	0
P0CG08;B7ZAQ6	P0CG08;B7ZAQ6	4;4	4;4	4;4	Golgi pH regulator B;Golgi pH regulator A	GPR89B;GPR89A	Golgi pH regulator B;Golgi pH regulator A	2	4	4	4	1	2	0	0	0	1	0	1	0	1	1	0	3	3	1	3	3	2	2	3	2	2	3	2	0	0	0	0	0	1	0	1	0	2	0	0	1	1
C9J7I0	C9J7I0	3	3	3	UBAP1-MVB12-associated (UMA)-domain containing protein 1	UMAD1	UBAP1-MVB12-associated (UMA)-domain containing protein 1	1	3	3	3	2	1	1	0	2	2	1	1	2	1	2	2	1	1	1	1	1	1	1	1	1	1	1	1	0	1	2	1	1	2	1	0	1	0	1	2	0	0
CON__A2A5Y0;CON__REFSEQ:XP_986630;CON__Q15323;O76015;CON__O76015;Q15323;CON__Q9UE12;CON__Q9D646;CON__O76014;CON__Q14532;CON__Q6IFU5;Q6A162;CON__Q14525;Q14532;O76014;Q14525;CON__Q6NTB9;O76011;CON__O76011;CON__Q8IUT8;O76009;CON__O76009	CON__A2A5Y0;CON__REFSEQ:XP_986630;CON__Q15323;O76015;CON__O76015;Q15323;CON__Q9UE12;CON__Q9D646;CON__O76014;CON__Q14532;CON__Q6IFU5;Q6A162;CON__Q14525;Q14532;O76014;Q14525	4;4;3;3;3;3;3;2;2;2;2;2;2;2;2;2;1;1;1;1;1;1	3;3;2;2;2;2;2;2;1;1;2;2;1;1;1;1;1;1;1;1;1;1	1;1;1;0;0;1;1;1;0;0;0;0;0;0;0;0;0;0;0;0;0;0	Keratin, type I cuticular Ha8;Keratin, type I cuticular Ha1;Keratin, type I cytoskeletal 40;Keratin, type I cuticular Ha2;Keratin, type I cuticular Ha7;Keratin, type I cuticular Ha3-II	KRT38;KRT31;KRT40;KRT32;KRT37;KRT33B	;;;Keratin, type I cuticular Ha8;;Keratin, type I cuticular Ha1;;;;;;Keratin, type I cytoskeletal 40;;Keratin, type I cuticular Ha2;Keratin, type I cuticular Ha7;Keratin, type I cuticular Ha3-II	22	4	3	1	1	1	1	1	2	1	2	1	1	1	1	1	1	1	1	1	1	1	0	1	1	1	1	4	1	1	1	1	1	1	1	1	1	1	1	1	1	1
CON__A3EZ79	CON__A3EZ79	10	1	1				1	10	1	1	1	0	0	0	0	0	0	0	0	0	0	0	0	0	1	0	0	0	0	0	0	0	0	0	6	6	6	7	6	6	6	6	4	6	6	6	9	6
CON__A3EZ82;Q6E0U4	CON__A3EZ82;Q6E0U4	12;12	12;12	3;3	Dermokine	DMKN	;Dermokine	2	12	12	3	0	0	0	1	0	0	0	0	0	0	0	1	0	0	1	0	0	0	0	0	0	0	0	0	8	8	8	9	8	8	8	8	6	8	8	8	11	8
CON__ENSEMBL:ENSBTAP00000006074;P49747	CON__ENSEMBL:ENSBTAP00000006074	8;3	8;3	7;2				2	8	8	7	0	1	0	1	0	2	1	0	0	1	2	0	0	1	1	0	0	0	2	1	0	0	7	1	0	0	0	0	0	0	0	0	1	0	0	0	0	0
CON__ENSEMBL:ENSBTAP00000007350	CON__ENSEMBL:ENSBTAP00000007350	91	23	22				1	91	23	22	69	73	69	68	61	69	69	67	67	70	68	58	78	75	76	79	79	69	74	80	71	76	79	71	12	11	11	11	11	12	11	11	11	13	11	12	7	9
CON__ENSEMBL:ENSBTAP00000011227	CON__ENSEMBL:ENSBTAP00000011227	3	3	3				1	3	3	3	3	2	2	2	2	2	2	2	3	2	2	3	2	2	1	2	3	2	2	1	2	2	2	1	0	0	0	0	0	0	0	0	0	0	0	0	0	0
CON__ENSEMBL:ENSBTAP00000013050;Q9UK55	CON__ENSEMBL:ENSBTAP00000013050	6;1	6;1	6;1				2	6	6	6	5	5	5	4	4	4	3	4	4	5	2	5	4	3	3	3	3	3	4	3	3	3	3	3	0	0	0	0	0	0	0	0	0	0	0	0	0	0
CON__ENSEMBL:ENSBTAP00000014147	CON__ENSEMBL:ENSBTAP00000014147	5	4	4				1	5	4	4	3	4	5	4	4	4	4	3	4	4	4	4	4	4	4	4	4	4	4	4	4	4	4	4	1	1	1	1	1	1	1	0	0	1	0	0	0	0
CON__ENSEMBL:ENSBTAP00000016046;P23142	CON__ENSEMBL:ENSBTAP00000016046	17;8	17;8	17;8				2	17	17	17	15	16	14	13	13	13	16	15	13	13	15	11	13	14	14	14	15	13	15	14	12	14	15	13	4	2	3	2	3	4	4	4	5	3	3	2	0	1
CON__ENSEMBL:ENSBTAP00000018229	CON__ENSEMBL:ENSBTAP00000018229	26	26	2				1	26	26	2	17	19	16	18	19	17	19	18	17	19	20	16	16	15	17	15	20	16	16	18	13	15	14	14	7	6	7	4	7	5	5	6	5	6	5	5	5	7
CON__ENSEMBL:ENSBTAP00000018574	CON__ENSEMBL:ENSBTAP00000018574	16	16	15				1	16	16	15	11	11	10	9	9	8	14	14	11	13	12	11	7	6	10	8	11	6	9	10	9	9	10	7	1	1	1	1	1	1	1	2	1	0	1	1	0	0
CON__ENSEMBL:ENSBTAP00000023055;Q04756	CON__ENSEMBL:ENSBTAP00000023055	5;2	5;2	5;2				2	5	5	5	2	3	3	3	2	4	3	2	3	3	3	2	4	3	3	4	5	3	4	4	4	4	4	3	2	2	2	2	2	1	3	2	2	1	2	1	0	0
CON__ENSEMBL:ENSBTAP00000024146;Q13609	CON__ENSEMBL:ENSBTAP00000024146	102;1	102;1	93;0				2	102	102	93	96	94	91	90	92	89	96	94	96	94	95	94	92	90	92	96	96	90	93	91	88	92	93	87	20	16	15	19	15	18	15	15	12	15	15	13	10	7
CON__ENSEMBL:ENSBTAP00000024466;CON__ENSEMBL:ENSBTAP00000024462	CON__ENSEMBL:ENSBTAP00000024466;CON__ENSEMBL:ENSBTAP00000024462	9;7	9;7	9;7			;	2	9	9	9	9	9	9	7	9	9	9	9	9	9	9	9	6	6	6	7	7	7	6	6	6	7	7	4	0	0	0	0	0	0	0	0	0	0	0	0	0	0
CON__ENSEMBL:ENSBTAP00000025008	CON__ENSEMBL:ENSBTAP00000025008	25	20	13				1	25	20	13	17	17	16	10	15	14	16	16	16	15	14	15	20	16	17	23	21	18	19	22	18	21	19	16	13	16	13	14	13	13	14	14	12	12	13	13	4	5
CON__ENSEMBL:ENSBTAP00000031360;O43866	CON__ENSEMBL:ENSBTAP00000031360	14;1	14;1	14;1				2	14	14	14	8	6	8	6	7	9	5	6	7	9	6	8	7	8	9	9	11	7	11	13	8	13	11	10	1	1	1	1	1	1	1	1	1	0	0	0	1	1
CON__ENSEMBL:ENSBTAP00000031900	CON__ENSEMBL:ENSBTAP00000031900	10	4	4				1	10	4	4	1	1	1	1	1	0	2	2	2	1	2	0	1	1	3	2	1	2	1	1	2	0	0	1	7	8	7	8	8	8	7	8	7	7	8	7	2	1
CON__ENSEMBL:ENSBTAP00000032840	CON__ENSEMBL:ENSBTAP00000032840	35	35	32				1	35	35	32	25	26	25	20	24	24	31	27	26	24	23	22	18	18	20	20	21	20	19	21	15	21	23	17	5	5	5	5	4	6	4	5	4	6	5	3	3	4
CON__ENSEMBL:ENSBTAP00000033053	CON__ENSEMBL:ENSBTAP00000033053	3	3	3				1	3	3	3	2	2	2	2	2	2	2	2	2	2	2	2	1	1	1	2	2	1	2	1	1	2	2	1	0	1	0	1	1	1	1	0	1	1	1	0	0	0
CON__ENSEMBL:ENSBTAP00000034412	CON__ENSEMBL:ENSBTAP00000034412	12	12	12				1	12	12	12	11	11	9	10	10	10	10	10	10	9	9	9	11	11	11	12	12	11	10	11	11	11	11	11	0	1	1	0	0	0	0	0	0	0	0	1	1	1
CON__ENSEMBL:ENSBTAP00000037665	CON__ENSEMBL:ENSBTAP00000037665	26	26	26				1	26	26	26	23	22	20	18	20	20	22	22	23	21	23	20	22	23	25	23	25	21	22	21	24	23	23	25	1	1	1	1	1	1	1	1	1	1	1	1	1	1
CON__ENSEMBL:ENSBTAP00000038253	CON__ENSEMBL:ENSBTAP00000038253	13	2	2				1	13	2	2	10	11	10	11	11	12	11	11	11	11	10	12	10	12	9	8	10	10	11	9	10	9	9	11	9	11	8	9	9	10	11	10	10	9	11	8	8	7
CON__ENSEMBL:ENSBTAP00000038329	CON__ENSEMBL:ENSBTAP00000038329	2	1	1				1	2	1	1	2	2	2	1	2	1	1	2	2	1	1	1	2	2	2	2	2	2	2	2	2	2	2	2	0	0	0	0	0	0	0	0	0	0	0	0	0	0
CON__ENSEMBL:ENSP00000377550;P13646;CON__P13646-1	CON__ENSEMBL:ENSP00000377550;P13646;CON__P13646-1	12;12;11	4;4;4	3;3;3	Keratin, type I cytoskeletal 13	KRT13	;Keratin, type I cytoskeletal 13;	3	12	4	3	6	6	5	6	6	7	6	6	6	11	6	7	7	6	6	6	7	6	6	6	6	7	6	7	6	7	7	6	8	7	7	7	6	7	10	6	7	7
CON__O76013;O76013	CON__O76013;O76013	4;4	1;1	1;1	Keratin, type I cuticular Ha6	KRT36	;Keratin, type I cuticular Ha6	2	4	1	1	1	1	1	1	2	1	2	1	1	1	1	1	1	1	1	1	1	1	0	1	1	1	1	4	1	1	1	1	1	1	1	1	1	1	1	1	1	1
CON__P00711	CON__P00711	1	1	1				1	1	1	1	0	0	0	0	0	0	0	0	0	0	0	0	0	0	0	0	0	0	0	0	0	0	0	0	0	0	0	0	0	0	0	0	0	0	0	0	0	0
CON__P00735	CON__P00735	39	39	28				1	39	39	28	33	35	31	31	33	32	34	34	32	30	33	32	33	30	32	33	33	32	34	33	32	35	35	33	10	8	10	8	8	8	9	8	9	9	9	10	6	5
CON__P00761	CON__P00761	12	12	11				1	12	12	11	9	9	10	8	10	9	10	8	9	9	10	9	8	7	6	6	8	6	7	7	6	7	7	6	8	10	9	9	8	8	9	8	9	10	9	8	4	4
CON__P00978;P02760	CON__P00978	12;1	12;1	12;1				2	12	12	12	9	8	8	7	7	8	9	8	8	7	9	9	8	8	7	6	6	7	7	7	7	8	8	7	1	2	1	0	0	1	0	0	0	0	0	0	1	1
CON__P01030	CON__P01030	92	92	24				1	92	92	24	69	73	69	65	63	67	68	67	66	66	64	58	76	76	76	82	80	73	77	80	75	78	80	74	13	11	12	11	11	12	12	11	11	14	12	13	8	9
CON__P01044-1	CON__P01044-1	20	1	0				1	20	1	0	15	13	15	15	15	16	12	14	15	14	13	13	15	15	14	15	12	15	15	15	13	15	16	15	0	0	0	0	0	0	0	0	0	0	0	0	0	1
CON__P01045-1	CON__P01045-1	16	2	2				1	16	2	2	10	9	10	11	12	13	10	10	12	10	10	11	11	11	11	11	10	11	12	13	9	11	11	11	0	0	0	0	0	0	0	0	0	0	0	0	0	1
CON__P01966	CON__P01966	8	8	5				1	8	8	5	7	7	7	6	8	6	7	7	8	8	8	8	8	7	7	8	7	8	8	8	8	8	8	8	1	3	2	2	2	1	1	2	2	2	2	2	3	2
CON__P02070	CON__P02070	8	4	4				1	8	4	4	6	6	7	4	6	6	7	7	7	7	7	7	8	7	7	8	8	8	8	8	8	8	8	7	3	4	3	4	0	2	1	2	1	1	2	1	1	3
CON__P02533;P02533;CON__P35900;CON__Q9D312;P35900	CON__P02533;P02533	35;35;3;3;3	12;12;0;0;0	5;5;0;0;0	Keratin, type I cytoskeletal 14	KRT14	;Keratin, type I cytoskeletal 14	5	35	12	5	29	24	19	32	28	22	28	31	29	28	24	27	30	26	23	18	25	13	19	18	15	22	22	32	24	27	25	25	25	27	23	26	26	27	25	26	26	26
CON__P02535-1	CON__P02535-1	10	2	2				1	10	2	2	8	9	6	8	8	8	8	7	8	9	8	8	7	8	7	8	8	7	6	7	7	7	8	8	8	7	7	7	7	8	8	7	7	7	8	7	6	7
CON__P02538;P02538	CON__P02538;P02538	46;46	35;35	2;2	Keratin, type II cytoskeletal 6A	KRT6A	;Keratin, type II cytoskeletal 6A	2	46	35	2	34	26	16	34	32	25	27	42	30	28	30	26	34	22	17	16	26	16	19	19	14	25	19	37	34	40	37	39	36	38	36	37	40	41	40	37	39	38
CON__P02584	CON__P02584	7	3	3				1	7	3	3	7	6	6	6	6	6	6	6	6	6	7	6	6	5	4	5	6	6	5	5	6	6	5	5	6	6	6	6	6	6	6	6	6	5	6	6	3	3
CON__P02662	CON__P02662	5	5	5				1	5	5	5	4	5	4	4	4	4	4	4	4	4	4	4	1	2	3	1	1	2	2	3	0	2	1	2	1	1	3	1	1	1	1	1	1	4	1	2	0	1
CON__P02666	CON__P02666	1	1	1				1	1	1	1	1	1	1	1	1	1	1	1	1	1	1	1	0	0	0	0	0	0	0	0	0	0	0	0	0	1	1	0	1	1	1	1	1	1	1	0	0	0
CON__P02668	CON__P02668	2	2	2				1	2	2	2	0	1	1	2	2	2	1	0	1	0	0	2	0	0	0	0	0	0	0	1	0	0	0	1	0	1	0	0	1	0	0	0	0	1	0	0	0	0
CON__P02672	CON__P02672	28	28	28				1	28	28	28	18	18	18	16	14	13	18	15	16	15	18	13	21	20	21	22	23	21	22	23	17	23	20	18	0	1	0	0	0	0	0	0	0	0	0	0	1	0
CON__P02676;P02675	CON__P02676	23;2	23;2	23;2				2	23	23	23	13	15	12	6	10	9	15	11	12	11	14	11	19	19	19	22	22	18	21	20	19	22	21	12	2	1	1	1	1	2	2	3	2	1	2	3	2	1
CON__P02754	CON__P02754	3	3	3				1	3	3	3	1	2	0	2	1	2	1	0	1	1	1	2	0	0	0	0	0	0	0	0	0	0	0	0	1	1	0	1	0	0	0	1	0	0	1	1	0	0
CON__P02768-1;P02768	CON__P02768-1;P02768	21;21	16;16	16;16	Serum albumin	ALB	;Albumin	2	21	16	16	11	11	10	14	13	15	9	9	15	11	6	13	6	6	9	8	8	9	6	7	7	7	7	9	6	8	7	7	6	7	7	7	7	7	10	7	9	6
CON__P02769	CON__P02769	68	68	63				1	68	68	63	60	62	61	62	63	63	60	60	64	61	60	58	58	60	62	58	60	61	58	59	58	61	60	60	44	26	30	30	17	15	24	32	24	24	26	20	31	27
CON__P02777	CON__P02777	6	6	6				1	6	6	6	4	3	2	4	5	4	3	2	3	5	4	4	3	4	4	4	4	4	5	6	6	5	5	5	0	1	0	0	0	0	0	0	0	0	0	0	0	0
CON__P04258;P02461	CON__P04258;P02461	2;1	2;1	2;1	Collagen alpha-1(III) chain	COL3A1	;Collagen alpha-1(III) chain	2	2	2	2	1	1	1	2	2	1	1	1	1	1	1	0	0	0	0	0	0	0	1	2	0	0	1	1	0	0	0	0	0	0	0	0	0	0	0	0	0	0
CON__P04259	CON__P04259	46	3	0				1	46	3	0	33	25	16	33	31	25	27	42	30	27	29	25	34	21	16	16	25	16	19	17	14	24	18	37	33	38	35	37	36	36	36	35	40	40	39	35	39	37
CON__P05787;P05787;CON__H-INV:HIT000292931;CON__Q9H552;CON__H-INV:HIT000016045;CON__REFSEQ:XP_092267	CON__P05787;P05787	35;35;15;12;5;2	26;26;12;10;2;2	24;24;12;8;2;2	Keratin, type II cytoskeletal 8	KRT8	;Keratin, type II cytoskeletal 8	6	35	26	24	6	6	4	10	6	7	7	9	8	9	6	6	27	25	27	28	29	29	24	25	27	27	26	28	13	17	19	12	19	20	15	20	15	23	21	18	22	20
CON__P06868;P08519;Q15195;Q02325	CON__P06868	38;2;1;1	38;2;1;1	31;0;0;0				4	38	38	31	22	31	24	23	26	22	25	26	23	23	26	23	27	29	28	29	28	24	26	23	24	29	27	21	6	7	6	6	6	5	5	7	7	7	5	5	2	1
CON__P07224	CON__P07224	7	7	7				1	7	7	7	7	6	4	6	4	6	6	5	5	7	6	6	3	3	3	3	3	3	3	3	0	2	2	3	1	0	0	1	0	1	0	1	1	1	1	1	0	0
CON__P08727;P08727	CON__P08727;P08727	24;24	14;14	11;11	Keratin, type I cytoskeletal 19	KRT19	;Keratin, type I cytoskeletal 19	2	24	14	11	7	8	5	9	10	5	7	9	8	8	7	7	15	15	14	18	18	15	14	16	15	17	14	18	10	10	9	10	10	11	9	8	9	8	9	9	9	10
CON__P08730-1	CON__P08730-1	11	2	2				1	11	2	2	6	6	5	7	7	5	8	7	7	8	6	6	8	7	8	8	7	6	7	6	7	7	6	8	7	7	7	8	7	7	7	7	7	6	8	7	6	7
CON__P08779;P08779	CON__P08779;P08779	36;36	27;27	16;16	Keratin, type I cytoskeletal 16	KRT16	;Keratin, type I cytoskeletal 16	2	36	27	16	27	23	16	30	25	17	25	32	29	25	26	24	31	23	18	16	20	10	14	17	12	28	20	35	22	25	25	26	24	24	23	25	25	24	26	23	28	29
CON__P12035;P12035	CON__P12035;P12035	16;16	4;4	3;3	Keratin, type II cytoskeletal 3	KRT3	;Keratin, type II cytoskeletal 3	2	16	4	3	9	8	6	11	9	9	9	12	11	12	8	11	9	9	4	5	9	7	7	7	7	9	8	11	7	10	8	9	6	9	9	10	8	9	12	7	8	7
CON__P12763;P02765	CON__P12763	20;5	20;5	20;5				2	20	20	20	16	16	16	17	18	16	15	15	16	17	17	16	13	11	12	13	16	14	12	14	14	15	13	13	13	7	10	9	7	5	6	8	5	3	5	8	4	6
CON__P13645;P13645;CON__Q7Z3Y7;Q7Z3Y7;CON__Q7Z3Z0;CON__Q7Z3Y8;CON__Q99456;CON__Q2M2I5;Q7Z3Z0;Q7Z3Y8;Q99456;Q2M2I5;CON__A2AB72;CON__Q7Z3Y9;Q7Z3Y9	CON__P13645;P13645	38;38;4;4;2;2;2;2;2;2;2;2;1;1;1	35;35;3;3;2;2;0;1;2;2;0;1;0;1;1	27;27;1;1;0;0;0;0;0;0;0;0;0;0;0	Keratin, type I cytoskeletal 10	KRT10	;Keratin, type I cytoskeletal 10	15	38	35	27	31	31	29	34	34	32	35	33	34	34	32	34	34	32	29	30	32	29	29	30	32	30	32	32	31	29	28	31	30	29	29	31	28	30	32	31	29	24
CON__P13647;P13647	CON__P13647;P13647	45;45	26;26	7;7	Keratin, type II cytoskeletal 5	KRT5	;Keratin, type II cytoskeletal 5	2	45	26	7	33	29	21	37	31	30	32	36	37	34	32	35	28	26	20	18	31	18	19	22	16	22	29	33	33	35	32	33	32	34	33	34	33	36	37	32	37	34
CON__P15497;P02647	CON__P15497	34;1	34;1	34;1				2	34	34	34	33	30	32	31	29	31	33	32	32	31	32	31	28	30	31	31	30	30	32	31	29	31	33	29	1	2	2	3	2	1	1	1	2	2	1	1	2	3
CON__P17690	CON__P17690	16	16	14				1	16	16	14	15	15	15	14	15	14	15	15	15	14	15	15	14	14	11	14	13	14	13	11	11	11	13	10	2	1	3	1	2	1	0	0	0	0	1	0	1	1
CON__P17697	CON__P17697	20	20	20				1	20	20	20	19	17	18	16	19	17	19	20	18	17	16	19	17	17	17	17	16	17	16	16	16	18	16	16	1	1	2	1	2	1	1	1	1	1	1	2	3	1
CON__P19012;P19012	CON__P19012;P19012	18;17	10;9	7;6	Keratin, type I cytoskeletal 15	KRT15	;Keratin, type I cytoskeletal 15	2	18	10	7	7	6	7	8	8	7	8	8	8	9	7	8	8	8	7	7	7	5	6	7	5	7	8	8	12	15	13	15	15	14	15	13	11	16	16	15	14	15
CON__P19013;P19013	CON__P19013;P19013	5;5	2;2	2;2	Keratin, type II cytoskeletal 4	KRT4	;Keratin, type II cytoskeletal 4	2	5	2	2	2	2	2	3	2	3	3	2	3	3	2	3	1	2	1	1	1	2	2	1	2	1	1	3	2	2	2	3	1	2	3	2	2	2	3	2	2	2
CON__P21752	CON__P21752	2	1	1				1	2	1	1	2	2	2	1	2	1	2	2	2	2	2	2	2	1	2	1	1	2	1	2	1	2	1	1	0	0	0	0	1	0	0	0	0	0	0	0	1	1
CON__P28800	CON__P28800	13	13	11				1	13	13	11	9	10	8	7	7	6	10	7	9	6	9	6	12	11	10	11	11	10	11	8	12	10	10	9	0	0	0	0	0	0	1	0	0	0	0	0	0	0
CON__P34955;Q8NI35	CON__P34955	28;1	28;1	28;1				2	28	28	28	26	27	24	26	27	22	23	25	28	26	24	26	23	22	21	25	24	21	22	23	23	23	24	22	8	8	14	14	2	3	1	8	6	2	2	5	1	8
CON__P35908	CON__P35908	55	1	1				1	55	1	1	45	46	38	52	43	44	49	44	50	54	47	54	36	47	26	30	47	31	35	32	39	34	45	39	38	33	29	21	27	41	32	42	25	35	45	24	29	16
CON__P35908v2;P35908	CON__P35908v2;P35908	56;56	56;56	2;2	Keratin, type II cytoskeletal 2 epidermal	KRT2	;Keratin, type II cytoskeletal 2 epidermal	2	56	56	2	45	46	38	52	43	44	50	45	50	55	47	54	36	47	26	30	47	31	35	33	40	34	45	40	39	34	29	21	28	42	32	43	25	36	46	24	30	17
CON__P41361	CON__P41361	19	19	15				1	19	19	15	12	16	11	12	11	13	14	13	13	11	14	9	12	13	12	11	12	11	13	12	9	13	11	11	8	8	7	8	8	7	6	6	6	7	6	5	4	5
CON__P50448	CON__P50448	4	4	4				1	4	4	4	1	1	1	1	1	2	2	2	1	1	2	1	2	1	1	2	1	2	2	3	2	1	2	0	0	0	0	0	0	0	0	0	0	0	0	0	0	0
CON__P81644	CON__P81644	11	11	11				1	11	11	11	8	7	7	9	8	7	8	7	7	8	8	7	8	9	9	10	10	8	10	11	9	10	11	8	1	1	2	1	0	0	0	1	0	0	0	1	0	1
CON__Q03247	CON__Q03247	26	26	22				1	26	26	22	24	24	23	23	22	22	22	23	22	20	20	19	21	22	22	20	22	21	22	23	20	23	20	22	2	3	2	4	3	5	2	4	2	3	4	4	4	6
CON__Q04695;Q04695;CON__Q9C075;CON__Q99PS0;Q9C075	CON__Q04695;Q04695	41;41;1;1;1	40;40;1;1;1	8;8;0;0;0	Keratin, type I cytoskeletal 17	KRT17	;Keratin, type I cytoskeletal 17	5	41	40	8	28	24	14	28	22	15	20	33	22	20	23	19	26	18	15	12	17	10	16	13	9	20	14	29	30	32	31	34	31	35	32	32	33	33	33	33	33	31
CON__Q05B55	CON__Q05B55	12	12	12				1	12	12	12	10	12	8	9	8	8	10	9	10	10	10	10	9	9	9	10	9	9	8	9	10	8	8	8	0	1	0	0	0	1	0	1	0	0	0	0	0	0
CON__Q0IIK2;CON__Q29443;CON__Q2HJF0	CON__Q0IIK2;CON__Q29443	42;41;2	42;41;2	39;38;1			;	3	42	42	39	32	33	31	31	33	32	33	31	30	29	28	27	27	28	31	36	37	31	30	29	27	32	34	24	3	3	4	4	3	3	5	4	4	5	3	3	5	4
CON__Q0V8M9	CON__Q0V8M9	24	24	20				1	24	24	20	21	24	20	19	21	20	23	20	22	22	22	22	16	17	16	17	18	17	16	18	17	18	19	15	4	4	4	3	5	2	3	3	5	3	3	2	2	3
CON__Q0VCM5	CON__Q0VCM5	16	16	13				1	16	16	13	8	5	8	6	6	6	11	10	11	11	11	4	4	5	4	4	4	4	6	6	5	7	8	4	4	5	5	4	5	5	4	5	5	5	5	6	1	1
CON__Q14533;Q14533;CON__O43790;O43790	CON__Q14533;Q14533;CON__O43790;O43790	12;12;11;11	11;11;10;10	2;2;1;1	Keratin, type II cuticular Hb1;Keratin, type II cuticular Hb6	KRT81;KRT86	;Keratin, type II cuticular Hb1;;Keratin, type II cuticular Hb6	4	12	11	2	0	1	0	2	1	0	0	0	1	1	2	2	1	1	1	1	2	1	1	1	2	1	1	4	7	10	8	10	9	8	7	8	9	7	8	8	7	7
CON__Q1A7A4	CON__Q1A7A4	55	55	50				1	55	55	50	33	32	29	16	30	22	37	36	31	36	36	26	44	44	41	45	47	42	45	45	39	40	44	39	8	8	9	8	9	9	8	9	8	6	9	8	3	1
CON__Q1RMK2	CON__Q1RMK2	22	22	22				1	22	22	22	20	21	21	19	21	20	21	21	22	21	21	21	20	20	20	21	21	18	21	21	20	21	20	19	2	2	3	3	3	2	3	2	3	2	2	3	1	1
CON__Q1RMN8;A0A075B6J9;P01721;P01700;P01699;P01703	CON__Q1RMN8	8;1;1;1;1;1	8;1;1;1;1;1	7;0;0;0;0;0				6	8	8	7	6	7	8	7	7	6	6	6	7	7	6	7	7	6	6	6	6	6	7	7	7	7	6	6	1	1	1	1	1	2	1	0	0	1	0	0	0	0
CON__Q28065;P04003	CON__Q28065	29;1	29;1	29;1				2	29	29	29	22	24	20	21	16	22	22	21	24	23	22	19	26	26	26	27	27	24	26	25	22	25	24	20	1	0	1	0	1	1	0	3	0	2	1	2	1	0
CON__Q28085	CON__Q28085	31	31	31				1	31	31	31	23	24	24	15	24	22	24	25	20	25	22	20	25	24	22	25	21	21	20	20	18	23	24	21	1	2	1	1	1	2	1	1	4	1	1	1	0	1
CON__Q28107	CON__Q28107	78	78	65				1	78	78	65	67	70	70	67	64	69	69	70	71	67	69	69	61	61	61	63	68	58	62	62	60	63	61	57	21	19	20	22	22	23	21	23	22	21	21	22	9	10
CON__Q28194;P49746	CON__Q28194	43;1	43;1	14;0				2	43	43	14	14	16	11	8	7	14	18	12	12	14	14	6	34	37	34	36	36	31	33	36	30	38	40	30	18	10	11	12	14	11	10	12	19	12	10	14	2	1
CON__Q29RQ1	CON__Q29RQ1	20	20	19				1	20	20	19	9	10	11	5	5	9	13	12	13	10	14	8	14	14	12	15	15	14	16	14	13	19	17	13	4	3	4	3	4	4	4	4	4	3	5	4	0	1
CON__Q2KIF2	CON__Q2KIF2	2	2	2				1	2	2	2	0	0	0	0	0	0	1	1	0	1	2	0	0	0	1	0	1	2	1	1	0	1	1	0	0	0	0	0	0	0	0	0	0	0	0	0	0	0
CON__Q2KIG3;P15086;P15085	CON__Q2KIG3	15;1;1	15;1;1	14;1;1				3	15	15	14	5	7	10	3	6	6	9	10	6	7	7	4	12	10	10	11	14	11	10	11	12	11	11	11	5	3	2	2	1	3	4	4	2	1	2	2	2	2
CON__Q2KIH2	CON__Q2KIH2	2	2	2				1	2	2	2	1	2	1	2	2	2	2	2	1	1	1	2	1	0	1	1	2	1	1	1	1	2	1	0	0	0	0	0	0	0	0	0	0	0	0	0	0	0
CON__Q2KIS7;P05452	CON__Q2KIS7;P05452	6;4	6;4	6;4	Tetranectin	CLEC3B	;Tetranectin	2	6	6	6	6	3	3	4	4	4	3	4	4	5	3	2	1	1	1	4	3	4	2	3	1	2	2	1	1	1	1	1	1	1	1	1	1	1	1	1	1	0
CON__Q2KJ62	CON__Q2KJ62	21	21	2				1	21	21	2	15	12	14	16	16	15	12	14	16	14	13	13	14	14	13	14	11	15	14	14	12	14	15	15	0	0	0	0	0	0	0	0	0	0	0	0	0	1
CON__Q2KJ83;P15169	CON__Q2KJ83	3;1	3;1	3;1				2	3	3	3	1	1	1	0	0	0	0	0	0	1	1	1	0	0	0	0	1	0	1	1	1	1	1	0	1	2	2	1	1	1	2	1	2	1	2	1	0	0
CON__Q2KJC7	CON__Q2KJC7	21	21	9				1	21	21	9	16	19	15	13	15	12	19	9	16	15	14	10	15	15	12	12	13	15	14	18	12	16	17	13	1	1	2	1	1	0	0	0	0	0	0	0	0	0
CON__Q2KJF1;P04217	CON__Q2KJF1	13;1	13;1	13;1				2	13	13	13	8	8	11	9	12	10	10	8	9	8	8	8	4	6	3	5	6	4	4	4	4	5	4	4	1	1	1	1	1	1	1	1	1	0	1	0	1	1
CON__Q2TBQ1	CON__Q2TBQ1	14	14	13				1	14	14	13	5	9	9	9	10	9	6	7	7	7	8	8	5	7	8	9	7	8	5	8	4	10	8	5	0	0	0	0	0	0	0	0	0	1	0	0	0	1
CON__Q2UVX4	CON__Q2UVX4	105	105	93				1	105	105	93	88	87	81	74	74	75	81	79	85	80	87	65	93	89	86	90	90	86	91	87	81	91	96	86	20	22	21	21	23	25	21	21	22	20	21	21	16	17
CON__Q7RTS7;CON__Q32MB2;Q7RTS7;Q86Y46;CON__Q3SY84;Q3SY84	CON__Q7RTS7;CON__Q32MB2;Q7RTS7;Q86Y46;CON__Q3SY84;Q3SY84	6;6;6;6;4;4	1;1;1;1;1;1	0;0;0;0;0;0	Keratin, type II cytoskeletal 74;Keratin, type II cytoskeletal 73;Keratin, type II cytoskeletal 71	KRT74;KRT73;KRT71	;;Keratin, type II cytoskeletal 74;Keratin, type II cytoskeletal 73;;Keratin, type II cytoskeletal 71	6	6	1	0	5	4	2	5	5	6	6	5	5	6	4	6	5	5	2	3	5	3	3	4	3	3	5	5	4	4	4	5	2	5	4	5	4	4	5	3	4	4
CON__Q32PI4;P05156	CON__Q32PI4	8;1	8;1	8;1				2	8	8	8	4	3	5	2	4	4	5	5	5	6	4	5	4	5	4	4	3	3	3	3	1	4	4	4	0	0	0	0	0	1	0	0	0	0	0	0	0	0
CON__Q32PJ2	CON__Q32PJ2	3	3	3				1	3	3	3	3	2	2	1	3	2	3	2	2	1	1	1	3	2	3	2	2	2	2	2	1	2	2	3	0	0	0	0	0	0	0	0	0	0	0	0	0	0
CON__Q3KNV1;P08729;CON__P08729;CON__Q9DCV7	CON__Q3KNV1;P08729;CON__P08729	29;29;27;9	23;23;21;3	20;20;18;2	Keratin, type II cytoskeletal 7	KRT7	;Keratin, type II cytoskeletal 7;	4	29	23	20	4	6	4	6	5	4	4	7	5	5	4	7	7	6	4	7	6	6	6	6	7	7	6	6	22	24	24	23	22	23	23	26	22	27	23	24	23	23
CON__Q3KUS7	CON__Q3KUS7	18	18	17				1	18	18	17	4	5	6	7	7	6	7	6	8	5	7	6	4	2	6	7	6	3	7	3	4	6	5	2	5	7	6	7	6	6	5	5	5	2	7	5	4	3
CON__Q3MHN2	CON__Q3MHN2	14	14	12				1	14	14	12	8	10	10	6	5	7	13	11	9	11	10	8	10	13	11	10	11	9	13	10	8	11	11	9	3	3	3	2	2	4	4	3	3	1	2	3	1	2
CON__Q3MHN5	CON__Q3MHN5	25	1	1				1	25	1	1	17	19	15	17	19	16	18	18	17	19	20	16	17	16	18	16	20	17	17	19	14	16	15	15	6	5	6	4	6	5	5	5	5	5	4	4	5	7
CON__Q3SX09;REV__Q9P209	CON__Q3SX09	19;1	19;1	13;0				2	19	19	13	17	16	17	17	17	17	16	17	17	18	16	18	18	19	17	19	19	18	17	19	17	17	18	16	2	7	9	6	0	2	1	3	3	2	2	2	2	7
CON__Q3SX14	CON__Q3SX14	23	23	8				1	23	23	8	15	15	11	15	13	12	15	13	11	11	14	9	15	14	13	13	14	14	13	15	13	14	15	11	12	11	13	12	14	14	11	14	14	12	12	11	11	10
CON__Q3SZ57;P02771	CON__Q3SZ57	33;4	33;4	33;4				2	33	33	33	26	28	26	27	26	28	27	28	28	27	28	27	13	15	13	14	20	16	15	20	17	13	19	14	1	0	0	0	0	1	1	0	0	0	0	1	0	0
CON__Q3SZH5	CON__Q3SZH5	14	14	14				1	14	14	14	13	14	12	14	12	13	14	14	13	13	14	12	12	10	10	12	14	10	13	14	13	14	14	9	0	0	0	1	0	0	0	1	0	0	0	0	0	0
CON__Q3SZR3	CON__Q3SZR3	11	11	11				1	11	11	11	7	8	7	9	9	8	8	8	7	7	7	8	5	3	5	5	5	5	5	5	5	4	5	5	0	0	0	0	0	0	0	0	0	0	0	0	0	0
CON__Q3SZV7	CON__Q3SZV7	8	8	8				1	8	8	8	4	6	5	4	7	7	7	3	3	8	6	5	7	7	7	6	7	7	6	6	6	7	7	5	0	0	0	0	0	0	0	0	0	0	0	0	0	0
CON__Q3T052	CON__Q3T052	27	27	26				1	27	27	26	20	23	20	21	20	20	22	21	22	17	20	18	17	13	16	17	16	17	19	18	16	19	22	16	1	2	3	3	1	1	1	1	1	1	1	1	2	3
CON__Q3Y5Z3	CON__Q3Y5Z3	6	6	6				1	6	6	6	6	5	5	6	5	5	6	5	6	6	6	6	5	5	4	5	5	5	5	5	5	5	4	4	1	2	1	2	2	1	1	0	1	1	1	2	0	1
CON__Q9Z2K1;CON__Q3ZAW8	CON__Q9Z2K1;CON__Q3ZAW8	14;14	1;1	1;1			;	2	14	1	1	9	8	6	13	8	6	8	11	11	8	10	10	13	11	9	7	9	6	6	9	6	10	10	14	8	10	10	9	10	10	10	10	11	11	12	12	12	11
CON__Q3ZBD7	CON__Q3ZBD7	6	2	2				1	6	2	2	5	3	4	4	4	4	3	4	3	4	4	4	1	0	0	1	2	0	0	1	1	3	2	1	3	3	3	3	3	3	3	3	2	3	3	3	1	0
CON__Q3ZBS7	CON__Q3ZBS7	18	18	15				1	18	18	15	16	16	16	15	16	17	16	17	17	17	16	16	16	16	14	17	17	15	17	18	16	15	16	14	1	1	1	1	1	2	1	2	1	2	2	2	2	2
CON__Q58D62	CON__Q58D62	16	16	16				1	16	16	16	14	14	13	13	14	13	13	13	12	12	14	12	8	8	9	11	12	9	10	13	12	11	12	7	0	2	3	2	1	0	0	1	0	1	0	0	1	0
CON__Q5D862;Q5D862	CON__Q5D862;Q5D862	15;15	15;15	15;15	Filaggrin-2	FLG2	;Filaggrin-2	2	15	15	15	6	6	2	11	8	8	6	3	5	8	4	11	1	4	0	1	1	1	2	1	4	2	6	8	2	0	0	0	0	1	0	2	0	0	5	0	1	0
CON__Q5XKE5;Q5XKE5	CON__Q5XKE5;Q5XKE5	14;14	4;4	3;3	Keratin, type II cytoskeletal 79	KRT79	;Keratin, type II cytoskeletal 79	2	14	4	3	7	8	6	9	7	7	8	8	9	9	7	8	7	9	5	6	9	7	7	7	6	8	8	8	7	8	7	7	5	9	7	9	8	8	9	7	9	8
CON__Q5XQN5;CON__REFSEQ:XP_932229;P14136;P48736	CON__Q5XQN5	36;2;1;1	1;0;0;0	0;0;0;0				4	36	1	0	25	24	16	30	24	23	26	30	28	28	25	27	22	21	15	14	26	15	15	17	12	19	23	27	25	25	24	24	26	28	26	26	25	27	31	25	28	24
CON__Q61782	CON__Q61782	7	1	1				1	7	1	1	6	5	4	6	5	4	5	5	5	4	4	4	7	7	4	2	5	1	4	2	2	4	6	7	5	6	6	6	6	6	5	6	7	6	6	6	7	5
CON__Q6IFX2	CON__Q6IFX2	18	1	1				1	18	1	1	13	11	9	14	12	9	11	14	14	12	10	12	14	13	11	10	13	8	9	10	7	12	11	16	14	14	13	13	14	15	14	13	13	14	13	13	13	13
CON__Q6KB66-1;Q6KB66	CON__Q6KB66-1;Q6KB66	2;2	2;2	2;2	Keratin, type II cytoskeletal 80	KRT80	;Keratin, type II cytoskeletal 80	2	2	2	2	1	1	1	1	1	1	1	1	2	1	1	1	0	0	0	0	0	0	0	0	0	0	1	0	0	0	0	0	0	0	0	0	0	0	0	0	0	0
CON__Q7RTT2;CON__Q8N1N4-2;Q8N1N4	CON__Q7RTT2;CON__Q8N1N4-2;Q8N1N4	11;11;11	8;8;8	8;8;8	Keratin, type II cytoskeletal 78	KRT78	;;Keratin, type II cytoskeletal 78	3	11	8	8	3	2	0	9	3	4	4	1	6	8	3	10	2	3	2	2	2	2	2	2	2	2	3	5	4	2	2	3	3	3	3	2	2	2	4	2	2	2
CON__Q7Z794;Q7Z794	CON__Q7Z794;Q7Z794	26;25	22;21	19;18	Keratin, type II cytoskeletal 1b	KRT77	;Keratin, type II cytoskeletal 1b	2	26	22	19	4	4	3	13	19	5	5	4	6	7	4	5	4	4	3	4	4	4	5	4	4	6	5	6	2	4	4	4	2	4	3	6	4	4	9	3	5	3
CON__Q86YZ3;Q86YZ3	CON__Q86YZ3;Q86YZ3	16;16	16;16	16;16	Hornerin	HRNR	;Hornerin	2	16	16	16	11	11	8	14	11	12	10	11	11	11	7	14	4	6	2	2	5	1	2	5	1	5	6	5	6	1	3	3	2	9	5	3	6	3	8	4	1	0
CON__Q922U2	CON__Q922U2	28	1	1				1	28	1	1	19	19	13	23	19	18	21	24	23	23	20	21	20	18	12	12	22	13	14	13	11	17	18	22	19	18	18	18	20	22	18	18	19	20	23	18	21	18
CON__Q95121	CON__Q95121	10	10	7				1	10	10	7	3	5	5	2	6	6	6	7	4	7	4	6	3	4	3	1	3	4	3	3	3	2	3	3	2	4	4	4	3	2	3	2	4	2	4	3	2	1
CON__Q95M17;Q9BZP6	CON__Q95M17	4;1	4;1	4;1				2	4	4	4	1	1	1	0	0	1	3	2	2	2	2	1	1	2	2	0	2	1	1	1	1	1	1	1	0	0	0	0	0	0	0	0	0	0	0	0	0	0
CON__Q9N2I2	CON__Q9N2I2	8	8	8				1	8	8	8	6	8	4	5	7	4	6	5	6	7	4	5	7	6	6	6	5	6	6	6	6	6	6	6	0	0	0	0	0	0	0	0	0	0	0	0	0	0
CON__Q9TRI1	CON__Q9TRI1	35	35	25				1	35	35	25	27	25	23	28	26	25	28	25	28	24	27	24	25	24	22	23	24	21	24	24	21	26	28	24	12	13	10	11	12	13	12	10	11	10	10	11	5	5
CON__Q9TT36;P05543	CON__Q9TT36	4;1	4;1	4;1				2	4	4	4	3	2	1	1	1	1	2	2	3	2	3	1	1	2	2	2	1	2	2	2	1	2	1	2	0	0	0	0	0	0	0	0	1	0	1	0	0	0
CON__Q9TTE1	CON__Q9TTE1	12	12	6				1	12	12	6	6	7	5	6	8	7	8	7	8	6	6	4	4	6	6	7	7	5	7	6	4	5	7	6	0	0	0	1	0	0	0	0	0	0	0	0	0	0
CON__REFSEQ:XP_001252647	CON__REFSEQ:XP_001252647	4	4	0				1	4	4	0	3	4	3	2	3	3	4	3	3	3	3	3	3	3	3	3	3	4	4	4	3	4	4	3	0	0	0	0	0	0	0	0	0	0	0	0	0	0
CON__REFSEQ:XP_585019;P43652	CON__REFSEQ:XP_585019	7;1	7;1	7;1				2	7	7	7	0	0	0	0	1	0	2	1	0	0	1	0	1	1	1	1	1	1	2	1	0	1	1	1	0	0	0	0	0	0	0	0	0	0	0	0	1	1
Q13765;E9PAV3	Q13765;E9PAV3	3;3	3;3	3;3	Nascent polypeptide-associated complex subunit alpha;Nascent polypeptide-associated complex subunit alpha, muscle-specific form	NACA	Nascent polypeptide-associated complex subunit alpha;Nascent polypeptide-associated complex subunit alpha, muscle-specific form	2	3	3	3	1	2	1	1	1	1	1	1	0	1	0	1	0	0	0	0	0	0	0	0	0	0	0	0	0	0	0	0	0	0	0	0	0	0	0	1	0	0
O00115	O00115	5	5	5	Deoxyribonuclease-2-alpha	DNASE2	Deoxyribonuclease-2-alpha	1	5	5	5	0	0	0	0	2	2	2	0	0	1	1	1	2	2	2	2	3	2	2	1	3	3	2	2	0	0	0	0	0	0	0	0	0	0	0	0	2	2
O00116	O00116	9	9	9	Alkyldihydroxyacetonephosphate synthase, peroxisomal	AGPS	Alkyldihydroxyacetonephosphate synthase, peroxisomal	1	9	9	9	0	0	0	0	0	0	1	0	0	1	1	1	0	0	0	0	0	0	0	0	1	0	0	0	0	0	0	0	0	0	0	1	0	1	0	0	6	4
O00148;Q13838	O00148;Q13838	6;4	6;4	6;4	ATP-dependent RNA helicase DDX39A;Spliceosome RNA helicase DDX39B	DDX39A;DDX39B	ATP-dependent RNA helicase DDX39A;Spliceosome RNA helicase DDX39B	2	6	6	6	2	1	1	0	1	1	1	1	1	2	1	0	1	2	1	2	3	3	2	3	2	3	2	1	1	1	0	1	2	1	1	1	0	1	0	0	0	0
O00151	O00151	5	5	5	PDZ and LIM domain protein 1	PDLIM1	PDZ and LIM domain protein 1	1	5	5	5	2	4	4	3	2	3	4	5	4	4	3	3	1	0	0	1	1	0	1	0	0	0	0	0	0	1	0	0	0	0	1	1	0	0	1	0	0	1
O00154	O00154	4	4	4	Cytosolic acyl coenzyme A thioester hydrolase	ACOT7	Cytosolic acyl coenzyme A thioester hydrolase	1	4	4	4	2	2	2	1	1	1	2	2	1	2	2	2	0	0	0	1	0	0	1	0	0	0	0	0	1	1	1	2	1	2	2	2	2	2	2	2	2	2
O00159	O00159	33	33	33	Unconventional myosin-Ic	MYO1C	Unconventional myosin-Ic	1	33	33	33	12	16	11	2	2	8	15	15	14	12	13	14	25	20	19	25	23	26	22	19	19	25	26	22	18	19	19	21	16	18	14	17	15	15	20	17	15	16
O00161	O00161	13	13	13	Synaptosomal-associated protein 23	SNAP23	Synaptosomal-associated protein 23	1	13	13	13	10	8	12	9	9	11	13	12	10	12	13	12	2	2	2	3	1	1	1	0	3	2	1	1	1	1	3	3	2	2	1	2	1	1	3	3	3	2
O00180	O00180	1	1	1	Potassium channel subfamily K member 1	KCNK1	Potassium channel subfamily K member 1	1	1	1	1	0	0	0	0	0	0	0	0	0	0	0	0	0	0	0	0	0	0	0	1	1	1	1	0	0	0	0	0	0	0	0	0	0	0	0	0	1	0
O00186	O00186	16	16	16	Syntaxin-binding protein 3	STXBP3	Syntaxin-binding protein 3	1	16	16	16	10	14	12	8	10	11	12	15	13	13	11	8	8	7	7	10	7	5	7	4	4	8	8	9	4	2	4	3	4	3	5	3	1	7	3	5	4	4
O00194	O00194	3	3	2	Ras-related protein Rab-27B	RAB27B	Ras-related protein Rab-27B	1	3	3	2	3	3	3	3	3	3	3	3	3	3	3	3	1	1	1	2	2	1	2	1	1	2	2	1	2	1	1	1	3	1	1	1	1	1	0	0	1	1
O00203	O00203	2	2	2	AP-3 complex subunit beta-1	AP3B1	AP-3 complex subunit beta-1	1	2	2	2	0	0	0	0	0	0	1	1	0	0	1	0	1	1	1	1	1	1	1	1	1	1	1	0	1	2	2	2	2	2	2	2	0	1	2	0	0	0
O00217	O00217	3	3	3	NADH dehydrogenase [ubiquinone] iron-sulfur protein 8, mitochondrial	NDUFS8	NADH dehydrogenase [ubiquinone] iron-sulfur protein 8, mitochondrial	1	3	3	3	0	0	0	0	0	0	0	0	0	0	1	0	0	0	0	0	0	0	0	0	0	0	0	0	0	0	0	0	0	0	0	0	0	0	0	0	1	1
O00231	O00231	16	16	16	26S proteasome non-ATPase regulatory subunit 11	PSMD11	26S proteasome non-ATPase regulatory subunit 11	1	16	16	16	3	6	5	2	2	2	6	7	5	4	6	5	8	6	9	6	9	7	8	5	6	10	7	7	12	10	10	9	10	10	10	10	10	8	8	10	0	2
O00232	O00232	10	10	10	26S proteasome non-ATPase regulatory subunit 12	PSMD12	26S proteasome non-ATPase regulatory subunit 12	1	10	10	10	1	2	1	1	0	1	2	3	1	2	2	2	3	3	2	4	3	1	2	1	3	3	2	4	7	4	7	8	5	6	7	4	4	1	7	6	0	2
O00238;P36894	O00238;P36894	1;1	1;1	1;1	Bone morphogenetic protein receptor type-1B;Bone morphogenetic protein receptor type-1A	BMPR1B;BMPR1A	Bone morphogenetic protein receptor type-1B;Bone morphogenetic protein receptor type-1A	2	1	1	1	1	1	0	0	0	0	1	1	1	1	1	1	0	0	0	0	1	0	0	0	0	0	0	0	0	0	0	0	1	1	1	0	0	0	0	0	0	0
O00264	O00264	9	9	8	Membrane-associated progesterone receptor component 1	PGRMC1	Membrane-associated progesterone receptor component 1	1	9	9	8	6	7	6	6	7	6	7	7	7	6	7	6	4	4	4	7	7	5	6	4	3	6	4	5	5	2	3	2	4	2	4	4	4	5	1	1	2	3
O00299	O00299	15	15	15	Chloride intracellular channel protein 1	CLIC1	Chloride intracellular channel protein 1	1	15	15	15	12	11	10	11	10	12	13	11	11	12	13	12	8	8	8	9	9	9	9	9	8	7	8	8	9	9	9	9	13	12	9	10	10	11	8	8	9	10
O00303	O00303	4	4	4	Eukaryotic translation initiation factor 3 subunit F	EIF3F	Eukaryotic translation initiation factor 3 subunit F	1	4	4	4	2	2	1	1	1	1	3	1	2	2	3	3	1	1	1	1	1	1	1	1	1	1	2	1	2	2	2	2	2	1	2	2	2	2	3	2	0	0
O00308	O00308	4	3	3	NEDD4-like E3 ubiquitin-protein ligase WWP2	WWP2	NEDD4-like E3 ubiquitin-protein ligase WWP2	1	4	3	3	1	3	2	0	0	0	3	3	2	3	2	2	3	4	2	3	3	3	2	2	3	3	3	3	0	2	0	2	1	0	1	0	2	1	1	1	0	0
O00330	O00330	3	3	3	Pyruvate dehydrogenase protein X component, mitochondrial	PDHX	Pyruvate dehydrogenase protein X component, mitochondrial	1	3	3	3	0	0	0	0	0	0	0	0	0	1	0	0	0	0	0	0	0	0	0	0	0	0	0	0	0	0	0	0	0	0	0	0	0	0	0	0	2	2
O00338	O00338	1	1	1	Sulfotransferase 1C2	SULT1C2	Sulfotransferase 1C2	1	1	1	1	1	1	0	0	0	1	1	1	1	1	1	1	1	0	0	0	0	0	0	0	0	0	0	0	0	0	0	0	0	0	0	0	0	0	0	0	0	0
O00339	O00339	5	5	5	Matrilin-2	MATN2	Matrilin-2	1	5	5	5	0	0	0	0	0	0	0	0	0	0	0	0	1	0	1	1	3	2	1	1	4	3	3	1	1	1	1	1	1	1	1	1	1	1	1	1	1	1
O00391	O00391	5	5	5	Sulfhydryl oxidase 1	QSOX1	Sulfhydryl oxidase 1	1	5	5	5	1	2	0	0	0	1	1	2	1	0	0	1	1	1	1	2	3	1	2	1	1	1	1	1	1	1	1	1	2	1	2	1	2	1	2	0	1	0
O00410	O00410	13	13	13	Importin-5	IPO5	Importin-5	1	13	13	13	6	7	5	2	4	3	8	8	6	6	8	6	3	2	1	4	4	2	2	3	2	4	3	1	3	1	2	2	5	3	2	2	2	3	3	2	1	0
O00429	O00429	7	7	7	Dynamin-1-like protein	DNM1L	Dynamin-1-like protein	1	7	7	7	3	3	1	0	0	2	4	3	3	4	4	3	2	1	0	3	4	3	4	3	2	2	2	2	4	3	3	3	2	3	3	3	0	1	3	2	0	0
O00461	O00461	6	6	6	Golgi integral membrane protein 4	GOLIM4	Golgi integral membrane protein 4	1	6	6	6	2	3	2	1	1	4	4	3	3	3	3	2	4	4	5	5	5	5	4	4	3	5	3	4	1	0	0	0	0	0	0	2	0	2	1	0	0	0
O00468	O00468	79	79	79	Agrin;Agrin N-terminal 110 kDa subunit;Agrin C-terminal 110 kDa subunit;Agrin C-terminal 90 kDa fragment;Agrin C-terminal 22 kDa fragment	AGRN	Agrin	1	79	79	79	39	52	44	31	26	33	41	41	31	34	30	33	68	61	62	70	72	69	63	70	77	72	76	65	59	54	48	45	53	49	48	56	46	51	51	54	14	17
O00469	O00469	18	18	18	Procollagen-lysine,2-oxoglutarate 5-dioxygenase 2	PLOD2	Procollagen-lysine,2-oxoglutarate 5-dioxygenase 2	1	18	18	18	2	1	0	0	2	1	2	2	1	1	2	1	2	2	2	1	2	1	1	1	1	2	1	2	12	11	10	12	12	12	11	13	9	13	12	10	13	11
O00487	O00487	4	4	4	26S proteasome non-ATPase regulatory subunit 14	PSMD14	26S proteasome non-ATPase regulatory subunit 14	1	4	4	4	1	1	2	0	1	1	3	3	3	1	1	1	1	1	2	0	1	1	2	1	0	1	1	1	3	3	3	3	3	3	2	1	2	2	2	2	0	0
O00559	O00559	1	1	1	Receptor-binding cancer antigen expressed on SiSo cells	EBAG9	Receptor-binding cancer antigen expressed on SiSo cells	1	1	1	1	0	0	0	0	0	0	0	0	0	0	0	0	1	1	0	1	0	1	1	1	0	0	0	1	0	0	0	0	0	0	0	0	0	0	0	0	0	0
O00560	O00560	22	22	22	Syntenin-1	SDCBP	Syntenin-1	1	22	22	22	20	17	20	21	17	19	17	19	16	19	19	21	15	13	15	17	17	15	15	17	18	19	19	16	16	17	15	18	16	18	15	16	17	17	21	17	8	7
O00567	O00567	12	12	12	Nucleolar protein 56	NOP56	Nucleolar protein 56	1	12	12	12	2	6	2	1	1	0	4	5	3	2	3	2	7	3	5	3	5	3	3	5	10	4	4	3	5	4	2	2	3	2	2	3	3	4	3	2	0	0
O00571;O15523;Q9NQI0	O00571;O15523	16;12;1	16;12;1	15;11;1	ATP-dependent RNA helicase DDX3X;ATP-dependent RNA helicase DDX3Y	DDX3X;DDX3Y	ATP-dependent RNA helicase DDX3X;ATP-dependent RNA helicase DDX3Y	3	16	16	15	7	12	7	3	4	5	9	11	11	9	11	7	9	8	9	10	9	9	7	9	8	9	10	10	9	9	9	12	6	13	9	8	7	4	12	10	5	3
O00584	O00584	2	2	2	Ribonuclease T2	RNASET2	Ribonuclease T2	1	2	2	2	1	0	0	1	0	1	1	0	0	0	1	1	0	0	0	1	0	0	0	0	0	0	0	1	0	0	0	0	0	0	0	0	0	0	0	0	1	1
O00592	O00592	3	3	3	Podocalyxin	PODXL	Podocalyxin	1	3	3	3	2	2	2	2	2	2	2	2	2	2	2	2	3	2	3	3	2	2	2	3	2	2	2	2	1	1	0	0	0	1	1	0	1	1	2	0	1	0
O00629	O00629	1	1	1	Importin subunit alpha-3	KPNA4	Importin subunit alpha-3	1	1	1	1	1	1	1	0	0	0	1	1	1	1	1	1	1	1	1	1	1	1	1	1	1	1	1	1	1	1	1	1	0	1	1	0	1	0	1	1	0	1
O00743	O00743	4	4	4	Serine/threonine-protein phosphatase 6 catalytic subunit;Serine/threonine-protein phosphatase 6 catalytic subunit, N-terminally processed	PPP6C	Serine/threonine-protein phosphatase 6 catalytic subunit	1	4	4	4	1	2	0	0	0	0	2	1	2	1	2	1	1	1	0	1	1	0	0	1	1	2	1	1	3	3	2	2	2	3	3	2	1	0	3	3	2	1
O00748	O00748	2	2	2	Cocaine esterase	CES2	Cocaine esterase	1	2	2	2	0	0	0	0	0	0	0	0	0	0	0	0	0	0	0	0	0	0	0	0	0	0	0	0	0	0	0	0	0	0	0	0	0	0	0	0	2	2
O00754	O00754	2	2	2	Lysosomal alpha-mannosidase;Lysosomal alpha-mannosidase A peptide;Lysosomal alpha-mannosidase B peptide;Lysosomal alpha-mannosidase C peptide;Lysosomal alpha-mannosidase D peptide;Lysosomal alpha-mannosidase E peptide	MAN2B1	Lysosomal alpha-mannosidase	1	2	2	2	1	1	1	1	1	1	1	1	1	1	1	1	1	1	1	1	1	1	1	0	1	1	1	1	0	0	0	0	0	0	0	0	0	0	0	0	1	0
O00767	O00767	2	2	2	Acyl-CoA desaturase	SCD	Acyl-CoA desaturase	1	2	2	2	0	0	0	0	0	0	0	0	0	0	0	0	2	0	1	1	1	2	0	0	1	1	0	0	0	0	0	0	0	1	0	0	0	0	0	0	0	0
O14493;O95484;P56747	O14493;O95484;P56747	2;1;1	1;0;0	1;0;0	Claudin-4;Claudin-9;Claudin-6	CLDN4;CLDN9;CLDN6	Claudin-4;Claudin-9;Claudin-6	3	2	1	1	0	0	0	0	0	0	0	0	0	0	0	0	2	1	2	2	2	2	2	2	0	2	2	2	1	2	2	1	2	2	2	1	2	2	1	2	0	1
O14495	O14495	1	1	1	Lipid phosphate phosphohydrolase 3	PPAP2B	Phospholipid phosphatase 3	1	1	1	1	1	1	1	0	0	0	1	1	1	1	1	1	0	0	0	0	0	0	0	0	0	0	0	0	0	0	0	0	0	0	0	0	0	0	0	0	0	0
O14578	O14578	5	5	5	Citron Rho-interacting kinase	CIT	Citron Rho-interacting kinase	1	5	5	5	0	0	1	0	0	0	2	1	0	0	1	1	0	0	0	1	1	1	0	0	0	1	1	0	0	0	0	1	0	1	0	0	0	0	0	0	0	1
P47813;O14602	P47813;O14602	2;2	2;2	2;2	Eukaryotic translation initiation factor 1A, X-chromosomal;Eukaryotic translation initiation factor 1A, Y-chromosomal	EIF1AX;EIF1AY	Eukaryotic translation initiation factor 1A, X-chromosomal;Eukaryotic translation initiation factor 1A, Y-chromosomal	2	2	2	2	1	1	2	1	0	1	1	1	1	1	1	1	1	0	0	0	0	0	0	0	0	1	0	0	0	0	0	0	0	0	0	0	0	0	0	0	0	0
O14610	O14610	1	1	1	Guanine nucleotide-binding protein G(I)/G(S)/G(O) subunit gamma-T2	GNGT2	Guanine nucleotide-binding protein G(I)/G(S)/G(O) subunit gamma-T2	1	1	1	1	0	0	0	0	0	0	0	0	0	0	0	0	1	1	1	1	0	1	1	1	1	1	1	1	0	0	0	0	0	0	0	0	0	0	0	0	1	1
Q5TA81;O14633	Q5TA81;O14633	1;1	1;1	1;1	Late cornified envelope protein 2C;Late cornified envelope protein 2B	LCE2C;LCE2B	Late cornified envelope protein 2C;Late cornified envelope protein 2B	2	1	1	1	0	0	0	0	0	0	0	0	0	1	0	1	0	0	0	0	0	0	0	0	0	0	0	0	0	0	0	0	0	0	0	0	0	0	1	0	0	0
O14654	O14654	20	20	20	Insulin receptor substrate 4	IRS4	Insulin receptor substrate 4	1	20	20	20	13	14	13	9	11	12	18	17	16	17	15	16	1	1	1	1	1	1	1	1	1	2	1	0	0	0	0	0	0	0	0	0	0	0	0	0	1	0
O14656	O14656	5	5	5	Torsin-1A	TOR1A	Torsin-1A	1	5	5	5	1	1	0	0	0	0	1	1	2	1	1	0	5	3	4	5	5	4	2	4	3	4	4	4	2	2	2	2	2	1	0	1	1	1	2	1	2	3
O14657	O14657	2	2	2	Torsin-1B	TOR1B	Torsin-1B	1	2	2	2	0	0	0	0	0	0	0	0	0	0	0	0	1	2	1	2	2	2	2	2	2	2	1	1	1	2	1	1	1	1	1	1	0	1	1	1	2	2
O14662	O14662	3	3	3	Syntaxin-16	STX16	Syntaxin-16	1	3	3	3	1	0	2	0	0	0	0	2	1	2	2	1	2	2	2	2	2	2	2	2	2	2	2	2	0	0	1	0	0	0	0	1	0	1	0	0	0	0
O14672	O14672	26	26	26	Disintegrin and metalloproteinase domain-containing protein 10	ADAM10	Disintegrin and metalloproteinase domain-containing protein 10	1	26	26	26	23	21	24	19	24	23	26	23	25	25	23	24	15	11	12	14	14	12	15	15	9	14	12	12	16	20	22	21	24	23	20	20	24	22	21	22	4	2
O14684	O14684	4	4	4	Prostaglandin E synthase	PTGES	Prostaglandin E synthase	1	4	4	4	0	0	0	0	0	0	0	0	0	0	0	0	1	1	1	1	1	1	0	1	1	1	0	0	4	4	4	3	3	2	4	4	4	4	3	4	2	3
O14735	O14735	3	3	3	CDP-diacylglycerol--inositol 3-phosphatidyltransferase	CDIPT	CDP-diacylglycerol--inositol 3-phosphatidyltransferase	1	3	3	3	1	0	0	0	0	0	1	1	1	1	1	0	2	1	2	2	1	2	1	1	0	1	1	0	1	1	0	0	0	1	1	0	0	1	1	1	1	1
O14737	O14737	5	5	5	Programmed cell death protein 5	PDCD5	Programmed cell death protein 5	1	5	5	5	4	3	5	4	5	5	5	5	5	5	4	5	0	0	1	0	0	1	0	0	0	1	0	0	0	0	0	0	0	0	0	0	0	0	0	0	0	0
O14744	O14744	6	6	6	Protein arginine N-methyltransferase 5;Protein arginine N-methyltransferase 5, N-terminally processed	PRMT5	Protein arginine N-methyltransferase 5	1	6	6	6	2	2	1	0	0	1	2	2	2	1	1	1	2	2	2	2	3	2	1	1	2	3	3	3	2	0	0	1	0	3	1	2	1	1	1	1	0	0
O14745	O14745	13	13	13	Na(+)/H(+) exchange regulatory cofactor NHE-RF1	SLC9A3R1	Na(+)/H(+) exchange regulatory cofactor NHE-RF1	1	13	13	13	7	9	8	7	5	8	8	9	12	9	11	8	6	6	6	7	6	6	6	4	6	8	9	5	0	1	0	2	2	2	0	1	0	5	0	0	2	3
O14763	O14763	4	4	4	Tumor necrosis factor receptor superfamily member 10B	TNFRSF10B	Tumor necrosis factor receptor superfamily member 10B	1	4	4	4	2	4	3	2	3	4	4	4	4	3	4	4	0	0	0	0	0	0	0	0	0	0	0	0	1	1	2	2	1	0	2	1	0	2	3	3	1	0
O14786	O14786	12	12	12	Neuropilin-1	NRP1	Neuropilin-1	1	12	12	12	9	12	9	9	9	10	11	11	12	11	12	12	3	3	3	3	3	2	1	2	2	2	1	2	0	0	0	0	0	0	1	0	1	0	1	0	0	0
O14817	O14817	6	6	6	Tetraspanin-4	TSPAN4	Tetraspanin-4	1	6	6	6	5	5	5	5	4	5	6	5	6	5	6	6	4	4	5	6	6	5	6	6	6	6	5	3	5	5	5	4	5	5	5	5	5	6	5	5	1	2
O14818;Q8TAA3	O14818	9;4	9;4	9;4	Proteasome subunit alpha type-7	PSMA7	Proteasome subunit alpha type-7	2	9	9	9	7	8	7	8	8	8	6	8	8	5	7	6	6	5	6	6	7	4	6	6	5	6	4	6	9	8	9	9	8	8	8	8	8	3	7	6	4	3
O14828	O14828	8	8	8	Secretory carrier-associated membrane protein 3	SCAMP3	Secretory carrier-associated membrane protein 3	1	8	8	8	6	5	7	5	4	7	6	6	8	7	6	7	4	3	3	3	5	3	3	4	3	3	3	4	4	4	5	4	4	5	4	5	4	4	4	4	2	1
O14896	O14896	2	2	2	Interferon regulatory factor 6	IRF6	Interferon regulatory factor 6	1	2	2	2	0	0	0	0	0	0	0	0	0	0	0	0	0	0	0	0	0	0	0	0	0	0	0	0	0	1	1	2	0	1	1	0	2	1	0	1	1	2
O14908;Q8TF64	O14908	7;1	7;1	7;1	PDZ domain-containing protein GIPC1	GIPC1	PDZ domain-containing protein GIPC1	2	7	7	7	3	4	5	1	2	4	5	6	5	4	3	4	0	0	0	0	1	0	0	0	2	1	0	1	0	1	0	0	1	1	1	1	1	0	1	1	1	4
O14910	O14910	5	2	2	Protein lin-7 homolog A	LIN7A	Protein lin-7 homolog A	1	5	2	2	3	4	5	2	2	4	4	3	3	4	4	2	2	2	2	3	1	3	2	0	2	2	3	1	0	1	1	1	1	1	0	0	0	1	0	1	1	2
O14925;Q5SRD1	O14925;Q5SRD1	1;1	1;1	1;1	Mitochondrial import inner membrane translocase subunit Tim23;Putative mitochondrial import inner membrane translocase subunit Tim23B	TIMM23;TIMM23B	Mitochondrial import inner membrane translocase subunit Tim23;Putative mitochondrial import inner membrane translocase subunit Tim23B	2	1	1	1	0	0	0	0	0	0	0	0	0	0	0	0	0	0	0	0	0	0	0	0	0	0	0	0	0	0	0	0	0	0	0	0	0	0	0	0	1	1
O14936	O14936	17	17	17	Peripheral plasma membrane protein CASK	CASK	Peripheral plasma membrane protein CASK	1	17	17	17	12	14	12	8	10	9	14	14	12	11	9	10	5	4	4	3	5	3	2	2	4	6	4	4	0	2	2	4	1	1	3	0	2	2	2	0	4	4
P19105;O14950;P24844	P19105;O14950;P24844	6;6;4	6;6;4	6;6;4	Myosin regulatory light chain 12A;Myosin regulatory light chain 12B;Myosin regulatory light polypeptide 9	MYL12A;MYL12B;MYL9	Myosin regulatory light chain 12A;Myosin regulatory light chain 12B;Myosin regulatory light polypeptide 9	3	6	6	6	1	2	2	2	1	3	4	4	3	4	5	4	3	3	2	4	4	3	3	3	1	3	3	3	6	4	6	6	3	6	5	6	5	2	5	6	2	2
O14957	O14957	1	1	1	Cytochrome b-c1 complex subunit 10	UQCR11	Cytochrome b-c1 complex subunit 10	1	1	1	1	0	0	0	0	0	0	0	0	0	0	0	0	0	0	0	0	0	0	0	0	0	0	0	0	0	0	0	0	0	0	0	0	0	0	0	0	1	1
O14964	O14964	15	15	15	Hepatocyte growth factor-regulated tyrosine kinase substrate	HGS	Hepatocyte growth factor-regulated tyrosine kinase substrate	1	15	15	15	14	13	13	13	12	14	14	14	14	12	12	14	3	2	1	3	3	2	2	2	1	3	2	2	8	9	10	9	10	6	6	8	7	9	8	6	1	0
O14975	O14975	5	5	5	Very long-chain acyl-CoA synthetase	SLC27A2	Very long-chain acyl-CoA synthetase	1	5	5	5	0	0	0	0	0	0	0	0	0	0	0	0	5	4	3	5	3	3	2	5	3	3	4	4	1	0	0	0	0	0	0	0	0	0	0	1	0	0
O14980	O14980	8	8	8	Exportin-1	XPO1	Exportin-1	1	8	8	8	3	4	3	2	1	2	5	4	3	3	4	2	4	3	3	5	4	3	5	1	3	6	5	3	4	2	4	5	4	2	3	4	2	3	2	2	0	0
O14983	O14983	9	1	1	Sarcoplasmic/endoplasmic reticulum calcium ATPase 1	ATP2A1	Sarcoplasmic/endoplasmic reticulum calcium ATPase 1	1	9	1	1	1	4	2	1	7	2	6	3	4	2	4	3	6	5	5	6	6	5	5	4	6	6	6	4	5	5	4	5	4	5	3	4	4	6	5	6	4	3
O15031;O60486;Q9Y4D7	O15031	22;1;1	22;1;1	22;1;1	Plexin-B2	PLXNB2	Plexin-B2	3	22	22	22	11	14	12	8	7	14	13	18	16	10	14	12	8	5	4	7	6	6	4	6	7	5	5	5	4	4	4	1	9	4	5	5	2	8	7	5	5	5
O15042	O15042	2	2	2	U2 snRNP-associated SURP motif-containing protein	U2SURP	U2 snRNP-associated SURP motif-containing protein	1	2	2	2	1	1	1	0	0	0	1	1	1	1	1	2	1	0	0	1	0	0	1	0	0	0	0	0	0	0	0	0	0	0	0	0	0	0	0	0	0	0
O15047	O15047	1	1	1	Histone-lysine N-methyltransferase SETD1A	SETD1A	Histone-lysine N-methyltransferase SETD1A	1	1	1	1	0	0	1	0	1	1	1	0	1	1	0	1	1	1	1	1	1	1	1	1	1	1	1	0	0	0	0	0	0	0	0	0	0	0	0	0	0	0
O15067	O15067	3	3	3	Phosphoribosylformylglycinamidine synthase	PFAS	Phosphoribosylformylglycinamidine synthase	1	3	3	3	2	0	0	0	0	0	0	2	1	1	1	1	0	2	1	1	2	2	1	2	1	1	1	1	0	0	1	0	1	0	0	0	0	0	1	0	0	0
O15118	O15118	4	4	4	Niemann-Pick C1 protein	NPC1	NPC intracellular cholesterol transporter 1	1	4	4	4	2	2	1	0	1	0	1	0	0	0	1	0	1	1	2	2	3	2	1	1	1	3	2	2	0	0	2	0	0	1	0	0	0	1	0	1	2	3
O15126	O15126	6	6	6	Secretory carrier-associated membrane protein 1	SCAMP1	Secretory carrier-associated membrane protein 1	1	6	6	6	3	3	4	2	3	3	3	3	4	4	4	3	4	2	3	4	6	6	5	4	5	6	4	3	3	4	4	3	3	3	3	2	3	2	3	2	1	0
O15127	O15127	3	3	3	Secretory carrier-associated membrane protein 2	SCAMP2	Secretory carrier-associated membrane protein 2	1	3	3	3	2	2	3	2	2	3	2	2	2	2	2	2	3	2	3	3	2	2	2	2	3	2	3	3	2	2	2	1	2	1	1	2	1	1	2	1	0	0
O15143	O15143	6	6	6	Actin-related protein 2/3 complex subunit 1B	ARPC1B	Actin-related protein 2/3 complex subunit 1B	1	6	6	6	1	1	1	0	0	0	1	2	2	2	0	1	1	1	1	1	2	1	1	1	1	1	1	1	5	4	5	6	5	5	5	5	5	3	4	4	1	1
O15144	O15144	7	7	7	Actin-related protein 2/3 complex subunit 2	ARPC2	Actin-related protein 2/3 complex subunit 2	1	7	7	7	2	4	5	1	1	0	4	4	3	4	2	4	2	1	2	2	3	1	1	2	0	1	1	1	6	6	7	6	6	6	6	6	6	5	6	6	2	1
O15145	O15145	4	4	4	Actin-related protein 2/3 complex subunit 3	ARPC3	Actin-related protein 2/3 complex subunit 3	1	4	4	4	1	2	1	1	1	1	1	3	3	1	1	2	1	1	1	0	1	1	1	1	0	1	1	1	3	1	2	2	2	3	2	2	1	2	2	2	2	2
O15155	O15155	2	2	2	BET1 homolog	BET1	BET1 homolog	1	2	2	2	0	2	2	1	1	0	1	1	0	0	1	1	2	1	1	2	2	2	2	2	2	2	2	2	0	0	0	0	0	0	0	0	0	0	0	0	0	0
O15162	O15162	4	4	4	Phospholipid scramblase 1	PLSCR1	Phospholipid scramblase 1	1	4	4	4	2	4	4	0	2	3	3	2	4	3	4	4	2	1	2	2	2	2	2	2	2	2	2	2	1	1	1	1	0	0	1	0	1	1	1	1	0	1
O15173	O15173	6	5	5	Membrane-associated progesterone receptor component 2	PGRMC2	Membrane-associated progesterone receptor component 2	1	6	5	5	4	3	4	4	4	4	5	4	4	4	4	4	4	3	4	5	5	5	5	5	4	5	3	4	5	1	2	2	3	2	2	3	1	4	2	1	4	4
P84022;Q99717;Q15797;Q15796;O15198	P84022;Q99717;Q15797;Q15796;O15198	1;1;1;1;1	1;1;1;1;1	1;1;1;1;1	Mothers against decapentaplegic homolog 3;Mothers against decapentaplegic homolog 5;Mothers against decapentaplegic homolog 1;Mothers against decapentaplegic homolog 2;Mothers against decapentaplegic homolog 9	SMAD3;SMAD5;SMAD1;SMAD2;SMAD9	Mothers against decapentaplegic homolog 3;Mothers against decapentaplegic homolog 5;Mothers against decapentaplegic homolog 1;Mothers against decapentaplegic homolog 2;Mothers against decapentaplegic homolog 9	5	1	1	1	1	1	0	0	0	0	1	0	1	1	1	0	0	0	0	0	0	0	0	0	0	0	0	0	0	0	0	0	0	0	0	0	0	0	0	0	0	0
O15228	O15228	7	7	7	Dihydroxyacetone phosphate acyltransferase	GNPAT	Dihydroxyacetone phosphate acyltransferase	1	7	7	7	0	0	0	0	1	0	0	0	0	0	0	0	0	0	0	1	0	1	0	0	0	0	0	0	0	0	0	0	0	0	0	0	0	0	1	0	5	3
O15230	O15230	135	135	133	Laminin subunit alpha-5	LAMA5	Laminin subunit alpha-5	1	135	135	133	48	92	55	31	22	37	57	49	35	37	26	31	110	107	104	112	122	117	109	110	133	123	124	116	73	57	48	52	54	53	44	62	52	54	63	59	14	17
O15240	O15240	3	3	3	Neurosecretory protein VGF;Neuroendocrine regulatory peptide-1;Neuroendocrine regulatory peptide-2;Antimicrobial peptide VGF[554-577]	VGF	Neurosecretory protein VGF	1	3	3	3	0	0	0	0	0	0	0	0	0	0	1	0	1	0	0	1	1	0	1	1	0	2	0	0	0	0	0	0	0	0	0	0	0	0	0	0	0	0
O15254	O15254	3	3	3	Peroxisomal acyl-coenzyme A oxidase 3	ACOX3	Peroxisomal acyl-coenzyme A oxidase 3	1	3	3	3	0	0	0	0	1	0	0	0	0	0	0	1	0	0	0	1	0	1	0	0	0	0	0	1	0	0	0	0	0	0	0	0	0	0	0	0	2	1
O15258	O15258	4	4	4	Protein RER1	RER1	Protein RER1	1	4	4	4	1	2	2	1	1	1	1	2	1	1	1	2	3	3	2	3	2	3	2	3	2	1	3	2	3	1	2	3	3	2	2	3	2	3	2	0	1	1
O15260	O15260	5	5	5	Surfeit locus protein 4	SURF4	Surfeit locus protein 4	1	5	5	5	4	5	5	4	5	5	5	5	5	5	5	5	5	5	4	5	5	5	5	5	4	4	4	5	4	5	5	5	5	4	4	4	3	4	3	3	3	2
O15269	O15269	9	9	9	Serine palmitoyltransferase 1	SPTLC1	Serine palmitoyltransferase 1	1	9	9	9	0	0	1	0	0	1	1	2	0	1	1	0	6	4	4	4	6	5	4	4	8	3	4	4	2	2	0	1	1	1	0	3	0	2	1	1	1	1
O15270	O15270	15	15	15	Serine palmitoyltransferase 2	SPTLC2	Serine palmitoyltransferase 2	1	15	15	15	0	0	0	0	0	0	0	0	0	0	1	0	7	8	9	9	10	8	5	5	8	8	7	7	4	2	2	4	2	2	3	6	3	6	2	3	3	3
O15294	O15294	2	2	2	UDP-N-acetylglucosamine--peptide N-acetylglucosaminyltransferase 110 kDa subunit	OGT	UDP-N-acetylglucosamine--peptide N-acetylglucosaminyltransferase 110 kDa subunit	1	2	2	2	0	0	0	0	0	0	0	0	0	0	0	0	0	0	1	2	0	0	1	0	0	1	1	1	0	0	0	0	0	0	0	0	0	0	0	0	0	0
O15321	O15321	2	2	2	Transmembrane 9 superfamily member 1	TM9SF1	Transmembrane 9 superfamily member 1	1	2	2	2	0	0	0	0	0	0	0	0	0	1	0	0	2	1	2	1	1	1	2	1	1	1	2	2	0	0	0	0	0	0	1	1	0	1	0	0	0	0
O15371	O15371	2	2	2	Eukaryotic translation initiation factor 3 subunit D	EIF3D	Eukaryotic translation initiation factor 3 subunit D	1	2	2	2	0	0	1	0	0	0	0	2	0	1	0	1	1	1	1	1	1	1	1	1	1	1	1	1	1	1	1	0	1	1	0	0	0	0	1	0	0	0
O15394	O15394	5	5	5	Neural cell adhesion molecule 2	NCAM2	Neural cell adhesion molecule 2	1	5	5	5	0	0	0	0	0	0	0	0	0	0	0	0	3	3	2	3	3	2	2	3	2	4	3	3	0	0	0	0	0	0	0	0	0	0	0	0	0	0
O15400	O15400	6	6	6	Syntaxin-7	STX7	Syntaxin-7	1	6	6	6	5	6	4	5	4	4	5	5	5	5	6	6	2	2	3	3	2	3	4	2	2	3	3	3	0	0	0	0	0	0	0	0	0	0	0	1	0	0
O15427	O15427	9	9	9	Monocarboxylate transporter 4	SLC16A3	Monocarboxylate transporter 4	1	9	9	9	0	0	0	0	0	0	0	0	0	0	0	0	0	1	1	1	0	1	2	0	1	1	0	1	6	6	5	6	6	6	5	6	5	6	6	5	7	6
O15431	O15431	2	2	2	High affinity copper uptake protein 1	SLC31A1	High affinity copper uptake protein 1	1	2	2	2	2	2	2	2	2	2	2	2	2	2	2	2	2	2	2	2	1	2	1	2	2	2	2	2	2	2	2	2	2	2	2	2	1	0	2	0	0	1
O15438	O15438	7	7	7	Canalicular multispecific organic anion transporter 2	ABCC3	Canalicular multispecific organic anion transporter 2	1	7	7	7	0	0	0	0	0	0	0	0	0	0	1	0	0	0	0	0	0	0	0	0	0	0	0	0	2	2	0	1	1	0	2	0	0	3	1	3	2	3
O15460	O15460	7	7	7	Prolyl 4-hydroxylase subunit alpha-2	P4HA2	Prolyl 4-hydroxylase subunit alpha-2	1	7	7	7	1	1	2	1	1	1	2	1	0	1	1	1	2	2	1	2	1	2	1	1	1	1	1	2	2	2	2	2	3	2	2	3	2	2	3	3	5	5
O15484	O15484	5	5	5	Calpain-5	CAPN5	Calpain-5	1	5	5	5	2	2	3	1	1	2	2	4	3	2	3	3	4	3	3	4	5	4	4	3	2	4	2	3	2	2	1	0	0	1	1	0	0	1	0	0	0	0
O15498	O15498	3	3	3	Synaptobrevin homolog YKT6	YKT6	Synaptobrevin homolog YKT6	1	3	3	3	2	2	0	0	1	2	2	2	3	2	2	3	0	0	0	1	0	0	0	1	0	1	0	0	1	1	1	0	1	0	0	0	0	0	1	1	0	0
O15551	O15551	5	5	4	Claudin-3	CLDN3	Claudin-3	1	5	5	4	0	0	0	0	0	0	0	0	0	0	0	0	5	4	5	5	5	5	5	5	3	5	4	5	1	1	1	1	1	1	1	1	1	1	1	1	0	1
O43143	O43143	11	11	11	Pre-mRNA-splicing factor ATP-dependent RNA helicase DHX15	DHX15	Pre-mRNA-splicing factor ATP-dependent RNA helicase DHX15	1	11	11	11	4	4	2	0	1	1	6	3	2	2	3	2	7	2	8	8	8	7	6	8	3	6	7	4	6	5	4	5	5	7	6	6	4	3	10	4	1	1
O43169	O43169	5	5	5	Cytochrome b5 type B	CYB5B	Cytochrome b5 type B	1	5	5	5	2	5	3	3	2	3	5	4	4	4	3	5	3	3	2	4	4	3	4	4	4	4	3	2	4	1	3	2	2	2	3	4	2	3	2	2	2	1
O43175	O43175	19	19	19	D-3-phosphoglycerate dehydrogenase	PHGDH	D-3-phosphoglycerate dehydrogenase	1	19	19	19	15	16	16	9	11	13	18	15	15	16	17	15	8	4	5	7	9	4	9	6	5	8	8	6	5	3	5	7	3	4	4	4	5	2	5	4	4	5
O43242	O43242	11	11	11	26S proteasome non-ATPase regulatory subunit 3	PSMD3	26S proteasome non-ATPase regulatory subunit 3	1	11	11	11	2	5	3	1	1	2	4	3	4	4	4	2	3	2	3	3	4	5	4	3	3	3	4	2	9	6	8	9	5	7	6	7	6	5	9	7	0	1
O43278	O43278	4	4	4	Kunitz-type protease inhibitor 1	SPINT1	Kunitz-type protease inhibitor 1	1	4	4	4	0	0	0	0	0	0	0	0	0	0	0	0	2	1	0	2	1	2	1	1	2	2	2	2	1	1	3	1	1	1	0	1	2	2	1	2	0	1
O43291	O43291	7	7	7	Kunitz-type protease inhibitor 2	SPINT2	Kunitz-type protease inhibitor 2	1	7	7	7	1	0	3	1	2	3	2	2	4	2	3	2	6	7	6	6	7	6	6	6	6	7	7	6	2	3	1	1	1	1	0	3	3	3	3	3	2	4
O43324	O43324	5	5	5	Eukaryotic translation elongation factor 1 epsilon-1	EEF1E1	Eukaryotic translation elongation factor 1 epsilon-1	1	5	5	5	4	5	4	3	3	4	4	4	3	4	4	4	2	0	1	2	3	1	2	2	3	3	2	0	1	2	3	2	3	3	2	2	2	0	0	0	0	0
O43390	O43390	5	5	2	Heterogeneous nuclear ribonucleoprotein R	HNRNPR	Heterogeneous nuclear ribonucleoprotein R	1	5	5	2	1	2	3	1	1	1	2	2	2	2	2	2	4	4	2	4	4	2	2	3	3	4	2	2	2	0	1	2	3	1	1	3	0	1	1	0	1	1
O43399	O43399	3	3	3	Tumor protein D54	TPD52L2	Tumor protein D54	1	3	3	3	1	1	2	0	1	1	1	3	1	2	2	1	0	0	0	0	0	0	0	0	0	0	0	0	0	0	0	0	0	0	0	0	0	0	0	0	0	0
O43402	O43402	3	3	3	ER membrane protein complex subunit 8	EMC8	ER membrane protein complex subunit 8	1	3	3	3	0	0	0	0	0	0	0	0	0	0	0	0	1	0	1	1	1	1	0	0	0	0	1	0	0	0	0	0	0	0	0	0	0	0	0	0	2	2
O43491	O43491	39	39	35	Band 4.1-like protein 2	EPB41L2	Band 4.1-like protein 2	1	39	39	35	26	31	31	19	23	28	30	32	29	31	30	26	2	2	2	2	2	1	1	1	2	0	1	0	0	0	0	0	0	1	1	1	1	2	0	0	2	0
O43493	O43493	6	6	6	Trans-Golgi network integral membrane protein 2	TGOLN2	Trans-Golgi network integral membrane protein 2	1	6	6	6	3	4	4	4	3	4	5	6	3	4	5	4	5	5	5	6	5	5	6	6	5	6	5	6	4	4	2	2	5	4	4	3	4	5	3	3	2	1
O43504	O43504	1	1	1	Ragulator complex protein LAMTOR5	LAMTOR5	Ragulator complex protein LAMTOR5	1	1	1	1	1	1	1	0	1	0	1	1	1	1	1	1	0	0	0	0	0	1	0	0	0	0	0	0	0	0	0	0	0	0	0	0	0	0	0	0	0	0
O43570	O43570	8	8	8	Carbonic anhydrase 12	CA12	Carbonic anhydrase 12	1	8	8	8	0	0	0	0	0	0	0	0	0	0	0	0	7	7	7	7	8	7	7	7	8	7	6	6	4	2	4	3	5	3	4	3	2	4	3	4	2	2
O43583	O43583	2	2	2	Density-regulated protein	DENR	Density-regulated protein	1	2	2	2	1	1	1	1	1	1	1	1	2	1	1	1	0	0	0	0	0	0	0	0	0	0	0	0	0	0	0	0	0	0	0	0	0	0	0	0	0	0
O43598	O43598	4	4	4	2-deoxynucleoside 5-phosphate N-hydrolase 1	DNPH1	2-deoxynucleoside 5-phosphate N-hydrolase 1	1	4	4	4	4	3	4	3	3	3	3	3	4	3	4	2	0	0	0	0	0	0	0	0	0	0	0	0	0	0	0	0	0	1	0	1	0	0	0	0	0	0
O43615	O43615	3	3	3	Mitochondrial import inner membrane translocase subunit TIM44	TIMM44	Mitochondrial import inner membrane translocase subunit TIM44	1	3	3	3	0	0	0	0	0	0	0	0	1	1	0	0	0	0	0	0	0	0	0	0	0	0	0	0	0	0	0	0	0	0	0	0	0	0	0	0	3	1
O43633	O43633	9	9	9	Charged multivesicular body protein 2a	CHMP2A	Charged multivesicular body protein 2a	1	9	9	9	9	8	9	8	9	8	9	9	9	8	7	7	3	2	5	2	2	3	3	4	2	4	3	3	2	2	2	5	4	3	2	0	3	3	3	2	1	1
O43653	O43653	3	3	3	Prostate stem cell antigen	PSCA	Prostate stem cell antigen	1	3	3	3	0	0	0	0	0	0	0	0	0	0	0	0	0	0	0	0	0	0	0	0	0	0	0	0	3	3	3	2	2	3	3	3	3	3	2	3	0	0
O43657	O43657	11	11	11	Tetraspanin-6	TSPAN6	Tetraspanin-6	1	11	11	11	10	8	10	10	11	11	10	10	10	11	10	11	5	5	5	6	5	6	6	6	5	5	5	5	5	6	7	7	7	7	7	5	7	7	8	7	2	2
O43678	O43678	1	1	1	NADH dehydrogenase [ubiquinone] 1 alpha subcomplex subunit 2	NDUFA2	NADH dehydrogenase [ubiquinone] 1 alpha subcomplex subunit 2	1	1	1	1	0	0	0	0	0	0	0	0	0	0	0	0	0	0	0	0	0	0	0	0	0	0	0	0	0	0	0	0	0	0	0	0	0	0	0	0	0	1
O43684	O43684	3	3	3	Mitotic checkpoint protein BUB3	BUB3	Mitotic checkpoint protein BUB3	1	3	3	3	1	2	0	1	1	1	2	2	2	1	1	2	1	1	1	2	1	0	0	0	0	1	0	1	2	1	3	2	2	3	2	2	2	1	1	1	0	1
O43707	O43707	39	39	25	Alpha-actinin-4	ACTN4	Alpha-actinin-4	1	39	39	25	15	14	17	15	15	16	22	20	17	21	19	17	11	11	10	18	14	16	9	7	11	18	15	13	18	20	21	14	20	21	15	21	16	21	15	17	27	27
O43747	O43747	5	5	5	AP-1 complex subunit gamma-1	AP1G1	AP-1 complex subunit gamma-1	1	5	5	5	2	2	0	0	0	0	2	5	3	2	3	2	3	1	1	4	4	3	3	3	3	4	2	1	0	0	1	0	1	0	0	1	0	0	1	0	0	0
O43752	O43752	6	6	6	Syntaxin-6	STX6	Syntaxin-6	1	6	6	6	2	3	3	1	1	2	4	5	4	1	3	4	1	0	3	2	4	0	1	2	1	2	1	1	1	0	1	0	1	0	0	0	1	1	0	0	0	0
O43759	O43759	2	2	2	Synaptogyrin-1	SYNGR1	Synaptogyrin-1	1	2	2	2	2	2	1	1	1	1	1	1	2	1	1	1	2	1	1	1	2	2	2	2	1	1	2	2	0	0	0	0	0	0	0	0	0	0	0	0	0	0
O43760	O43760	5	5	5	Synaptogyrin-2	SYNGR2	Synaptogyrin-2	1	5	5	5	5	4	4	4	3	3	3	4	4	4	3	3	5	4	4	4	4	4	4	4	4	4	4	5	3	4	4	4	4	4	3	4	4	3	3	3	3	2
O43765	O43765	3	3	3	Small glutamine-rich tetratricopeptide repeat-containing protein alpha	SGTA	Small glutamine-rich tetratricopeptide repeat-containing protein alpha	1	3	3	3	2	1	2	1	2	2	2	2	1	2	1	2	0	0	0	0	0	0	0	0	0	0	0	0	0	0	0	0	0	0	0	0	0	0	0	0	0	0
O43768;P56211	O43768	4;1	4;1	4;1	Alpha-endosulfine	ENSA	Alpha-endosulfine	2	4	4	4	2	2	2	2	3	3	2	3	3	2	3	3	0	0	0	0	0	0	0	0	0	0	0	0	0	0	0	0	0	0	0	0	0	0	0	0	0	0
O43776	O43776	8	8	8	Asparagine--tRNA ligase, cytoplasmic	NARS	Asparagine--tRNA ligase, cytoplasmic	1	8	8	8	5	4	3	1	1	3	5	7	5	4	5	2	5	5	4	7	7	7	6	6	5	6	6	5	4	3	6	5	3	5	3	5	3	2	2	2	1	2
O43795;Q9UBC5	O43795	20;2	20;2	20;2	Unconventional myosin-Ib	MYO1B	Unconventional myosin-Ib	2	20	20	20	6	7	3	0	0	0	9	11	7	9	7	3	7	8	9	9	10	7	7	5	4	6	7	6	12	12	14	11	11	13	10	14	9	11	11	10	11	11
O43813	O43813	3	3	3	LanC-like protein 1	LANCL1	Glutathione S-transferase LANCL1	1	3	3	3	2	2	2	1	2	2	2	2	2	2	3	2	0	0	0	0	0	0	0	0	0	0	0	1	1	1	1	2	2	1	2	1	2	0	2	1	0	0
O43826	O43826	3	3	3	Glucose-6-phosphate translocase	SLC37A4	Glucose-6-phosphate exchanger SLC37A4	1	3	3	3	0	1	0	0	0	0	0	0	0	0	0	0	1	1	0	2	1	1	1	1	1	1	1	1	1	1	1	1	1	1	1	1	0	1	1	1	0	0
O43837	O43837	2	2	2	Isocitrate dehydrogenase [NAD] subunit beta, mitochondrial	IDH3B	Isocitrate dehydrogenase [NAD] subunit beta, mitochondrial	1	2	2	2	0	0	0	0	0	0	0	0	0	0	0	0	0	0	0	0	0	0	0	0	0	0	0	0	0	0	0	0	0	0	0	0	0	0	0	0	1	1
O43852	O43852	15	15	15	Calumenin	CALU	Calumenin	1	15	15	15	9	10	10	10	9	9	9	12	10	10	9	11	8	6	8	8	6	7	6	3	6	7	8	8	8	8	7	10	8	10	9	11	7	12	8	9	10	8
O43854	O43854	30	30	30	EGF-like repeat and discoidin I-like domain-containing protein 3	EDIL3	EGF-like repeat and discoidin I-like domain-containing protein 3	1	30	30	30	29	29	30	27	29	27	30	29	28	27	27	28	5	6	4	7	8	7	8	8	7	9	8	7	0	0	0	0	1	0	0	2	0	1	0	0	1	0
O43865;Q96HN2	O43865;Q96HN2	3;3	3;3	3;3	Putative adenosylhomocysteinase 2;Putative adenosylhomocysteinase 3	AHCYL1;AHCYL2	S-adenosylhomocysteine hydrolase-like protein 1;Adenosylhomocysteinase 3	2	3	3	3	1	1	1	0	1	1	2	2	3	1	1	1	1	1	0	1	1	1	1	2	1	1	2	1	0	0	0	0	3	1	0	2	0	3	0	2	1	0
O43920	O43920	1	1	1	NADH dehydrogenase [ubiquinone] iron-sulfur protein 5	NDUFS5	NADH dehydrogenase [ubiquinone] iron-sulfur protein 5	1	1	1	1	0	0	0	0	0	0	0	0	0	0	0	0	0	0	0	0	0	0	0	0	0	0	0	0	0	0	0	0	0	0	0	0	0	0	0	0	1	1
O60220	O60220	1	1	1	Mitochondrial import inner membrane translocase subunit Tim8 A	TIMM8A	Mitochondrial import inner membrane translocase subunit Tim8 A	1	1	1	1	0	0	0	0	0	0	0	0	0	0	0	0	0	0	0	0	0	0	0	0	0	0	0	0	0	0	0	0	0	0	0	0	0	0	0	0	0	0
O60232	O60232	3	3	3	Sjoegren syndrome/scleroderma autoantigen 1	SSSCA1	Protein ZNRD2	1	3	3	3	1	1	1	0	0	0	1	2	1	1	1	1	2	2	2	2	3	2	2	2	2	3	2	2	0	1	1	1	2	0	1	0	0	0	1	0	1	1
O60245	O60245	2	2	2	Protocadherin-7	PCDH7	Protocadherin-7	1	2	2	2	1	1	2	1	1	2	1	2	2	1	1	1	0	0	0	0	0	0	0	0	0	0	0	0	0	0	0	0	0	0	0	0	0	0	0	0	0	0
O60262	O60262	3	3	3	Guanine nucleotide-binding protein G(I)/G(S)/G(O) subunit gamma-7	GNG7	Guanine nucleotide-binding protein G(I)/G(S)/G(O) subunit gamma-7	1	3	3	3	2	2	3	2	2	2	2	2	2	1	2	2	2	1	2	2	0	2	1	2	2	1	2	2	0	0	0	0	1	0	0	0	0	0	0	0	1	1
O60264;P28370	O60264	22;6	22;6	22;6	SWI/SNF-related matrix-associated actin-dependent regulator of chromatin subfamily A member 5	SMARCA5	SWI/SNF-related matrix-associated actin-dependent regulator of chromatin subfamily A member 5	2	22	22	22	3	9	1	1	1	2	6	6	4	7	4	2	17	13	11	18	15	15	14	15	20	15	15	15	0	2	1	0	0	0	0	0	0	0	0	0	1	0
O60266	O60266	1	1	1	Adenylate cyclase type 3	ADCY3	Adenylate cyclase type 3	1	1	1	1	0	0	0	0	0	0	0	0	0	0	0	0	0	0	0	0	0	0	0	0	0	0	0	0	0	0	0	0	0	0	0	0	0	0	0	0	0	0
O60279	O60279	1	1	1	Sushi domain-containing protein 5	SUSD5	Sushi domain-containing protein 5	1	1	1	1	1	1	1	1	1	1	1	1	1	1	1	0	0	0	0	0	0	0	0	0	0	0	0	0	0	0	0	0	0	0	0	0	0	0	0	0	0	0
O60281	O60281	2	2	2	Zinc finger protein 292	ZNF292	Zinc finger protein 292	1	2	2	2	0	0	0	0	0	0	1	1	0	0	0	0	0	0	0	0	0	0	0	0	1	0	0	2	1	0	0	1	0	0	0	0	0	0	0	0	0	0
O60291	O60291	2	2	2	E3 ubiquitin-protein ligase MGRN1	MGRN1	E3 ubiquitin-protein ligase MGRN1	1	2	2	2	1	1	1	0	1	1	1	1	2	0	1	1	1	0	0	1	1	1	0	0	0	1	0	0	0	0	0	0	0	0	0	0	0	1	0	0	0	0
O60361	O60361	5	1	1	Putative nucleoside diphosphate kinase	NME2P1	Putative nucleoside diphosphate kinase	1	5	1	1	4	4	4	4	4	4	4	4	4	4	4	4	2	2	2	2	2	2	2	2	2	2	3	3	2	4	3	3	3	4	2	2	2	2	4	3	3	3
O60476	O60476	6	6	6	Mannosyl-oligosaccharide 1,2-alpha-mannosidase IB	MAN1A2	Mannosyl-oligosaccharide 1,2-alpha-mannosidase IB	1	6	6	6	0	0	0	0	0	0	0	0	1	0	0	0	4	2	2	4	5	3	2	2	3	3	4	3	1	0	1	0	1	0	0	2	0	0	1	1	0	0
O60487	O60487	2	2	2	Myelin protein zero-like protein 2	MPZL2	Myelin protein zero-like protein 2	1	2	2	2	0	0	0	0	0	0	0	1	0	0	0	0	0	0	1	0	0	0	1	0	1	0	0	1	2	2	2	2	2	2	2	2	2	1	2	2	1	1
O60488	O60488	15	13	13	Long-chain-fatty-acid--CoA ligase 4	ACSL4	Long-chain-fatty-acid--CoA ligase 4	1	15	13	13	9	8	5	3	2	4	7	11	6	7	6	5	2	2	2	2	2	3	2	3	2	1	1	2	5	8	9	6	9	9	10	6	7	5	8	9	6	7
O60493;Q9UMY4	O60493	3;1	3;1	3;1	Sorting nexin-3	SNX3	Sorting nexin-3	2	3	3	3	2	1	0	0	1	1	2	2	1	2	2	2	1	1	1	2	0	2	2	1	0	1	2	1	0	0	0	0	0	0	0	0	0	0	0	0	0	0
O60499	O60499	4	4	4	Syntaxin-10	STX10	Syntaxin-10	1	4	4	4	2	1	1	1	0	2	1	2	2	1	1	2	1	1	2	3	1	1	1	1	0	1	1	2	0	0	0	0	0	0	0	0	0	0	0	0	0	0
O60568	O60568	22	22	22	Procollagen-lysine,2-oxoglutarate 5-dioxygenase 3	PLOD3	Multifunctional procollagen lysine hydroxylase and glycosyltransferase LH3	1	22	22	22	1	2	1	2	1	1	1	1	1	1	1	1	9	12	11	12	12	10	10	10	10	14	12	11	8	10	5	9	8	8	6	10	4	5	6	9	11	13
O60610	O60610	7	7	7	Protein diaphanous homolog 1	DIAPH1	Protein diaphanous homolog 1	1	7	7	7	1	1	1	0	0	0	1	4	0	0	1	0	0	0	1	2	2	2	1	2	2	3	1	1	5	3	2	3	3	2	1	1	0	2	2	2	2	0
O60613	O60613	7	7	7	15 kDa selenoprotein	SEP15	Selenoprotein F	1	7	7	7	0	1	2	1	0	2	1	3	3	1	1	1	2	1	0	3	1	2	0	0	2	0	1	0	5	5	2	3	4	4	4	4	3	4	4	4	4	4
O60635	O60635	2	2	2	Tetraspanin-1	TSPAN1	Tetraspanin-1	1	2	2	2	0	0	0	0	0	0	0	0	0	0	0	0	0	0	0	0	0	0	0	0	0	0	0	0	1	2	1	2	1	1	1	2	1	1	2	1	0	0
O60636	O60636	1	1	1	Tetraspanin-2	TSPAN2	Tetraspanin-2	1	1	1	1	1	1	1	1	1	1	1	1	1	1	1	1	0	0	0	0	0	0	0	0	0	0	0	0	0	0	0	0	0	0	0	0	0	0	0	0	0	0
O60637	O60637	5	5	5	Tetraspanin-3	TSPAN3	Tetraspanin-3	1	5	5	5	4	4	4	3	4	3	4	4	3	4	3	4	2	1	1	1	1	0	1	1	2	0	0	0	0	0	0	0	0	1	0	0	0	0	0	2	0	0
O60669	O60669	3	3	3	Monocarboxylate transporter 2	SLC16A7	Monocarboxylate transporter 2	1	3	3	3	0	0	0	0	0	0	0	0	1	0	0	0	0	0	0	0	0	0	0	0	0	0	0	0	1	3	2	1	3	2	3	1	1	2	2	2	0	1
O60684;O15131;P52294	O60684;O15131;P52294	5;3;3	5;3;3	5;3;3	Importin subunit alpha-7;Importin subunit alpha-6;Importin subunit alpha-5;Importin subunit alpha-5, N-terminally processed	KPNA6;KPNA5;KPNA1	Importin subunit alpha-7;Importin subunit alpha-6;Importin subunit alpha-5	3	5	5	5	2	0	0	0	0	0	2	0	0	0	1	0	0	1	2	2	2	1	1	0	2	1	2	0	2	3	2	3	3	4	3	3	2	1	3	1	0	0
O60701	O60701	6	6	6	UDP-glucose 6-dehydrogenase	UGDH	UDP-glucose 6-dehydrogenase	1	6	6	6	4	5	2	0	0	1	4	4	3	4	4	5	3	2	3	4	5	2	3	3	4	3	3	1	0	1	1	1	1	1	0	1	1	0	1	1	0	0
O60716	O60716	26	26	26	Catenin delta-1	CTNND1	Catenin delta-1	1	26	26	26	20	20	21	14	16	18	24	24	23	22	22	20	12	13	9	17	15	13	12	12	16	17	15	15	12	17	18	17	18	16	15	13	16	18	17	15	5	7
O60762	O60762	9	9	9	Dolichol-phosphate mannosyltransferase subunit 1	DPM1	Dolichol-phosphate mannosyltransferase subunit 1	1	9	9	9	2	4	1	1	0	1	5	3	2	2	3	2	6	7	6	7	6	5	4	3	6	5	6	7	3	2	2	2	2	2	2	6	1	6	2	3	6	7
Q99879;Q99877;Q93079;Q5QNW6;P62807;P58876;O60814;P57053	Q99879;Q99877;Q93079;Q5QNW6;P62807;P58876;O60814;P57053	13;13;13;13;13;13;13;11	13;13;13;13;13;13;13;11	0;0;0;0;0;0;0;0	Histone H2B type 1-M;Histone H2B type 1-N;Histone H2B type 1-H;Histone H2B type 2-F;Histone H2B type 1-C/E/F/G/I;Histone H2B type 1-D;Histone H2B type 1-K;Histone H2B type F-S	HIST1H2BM;HIST1H2BN;HIST1H2BH;HIST2H2BF;HIST1H2BC;HIST1H2BD;HIST1H2BK;H2BFS	Histone H2B type 1-M;Histone H2B type 1-N;Histone H2B type 1-H;Histone H2B type 2-F;Histone H2B type 1-C/E/F/G/I;Histone H2B type 1-D;Histone H2B type 1-K;Histone H2B type F-S	8	13	13	0	12	12	12	12	11	11	11	12	11	10	11	11	11	12	13	12	10	12	11	11	13	10	13	12	8	7	9	9	8	8	10	10	10	10	10	10	4	6
O60832	O60832	3	3	3	H/ACA ribonucleoprotein complex subunit 4	DKC1	H/ACA ribonucleoprotein complex subunit DKC1	1	3	3	3	0	0	0	0	0	0	1	0	0	0	0	0	2	1	2	2	2	1	0	1	3	1	1	2	1	0	0	0	0	0	0	1	0	0	0	0	0	0
O60869	O60869	2	2	2	Endothelial differentiation-related factor 1	EDF1	Endothelial differentiation-related factor 1	1	2	2	2	2	0	1	1	1	2	1	2	1	2	1	2	0	0	0	0	0	0	0	0	0	0	0	0	0	0	0	0	0	0	0	0	0	0	0	0	0	0
O60884	O60884	19	19	19	DnaJ homolog subfamily A member 2	DNAJA2	DnaJ homolog subfamily A member 2	1	19	19	19	16	16	15	14	13	16	16	16	14	16	17	16	4	5	6	4	4	3	5	1	3	4	4	5	9	6	7	9	5	7	7	6	6	8	8	8	1	2
O60888	O60888	3	3	3	Protein CutA	CUTA	Protein CutA	1	3	3	3	2	2	2	2	1	2	3	2	2	2	2	3	1	0	0	0	2	0	0	0	1	0	0	0	0	0	0	0	1	0	0	0	0	0	0	0	1	1
O60941;Q9Y4J8	O60941;Q9Y4J8	2;1	2;1	2;1	Dystrobrevin beta;Dystrobrevin alpha	DTNB;DTNA	Dystrobrevin beta;Dystrobrevin alpha	2	2	2	2	0	1	1	0	0	0	1	1	0	1	1	0	0	0	0	0	0	0	0	0	0	0	0	0	1	1	1	1	1	1	1	0	0	0	1	0	1	1
O75044;P0DMP2;P0DJJ0;Q7Z6B7	O75044;P0DMP2;P0DJJ0	7;4;4;2	7;4;4;2	7;4;4;2	SLIT-ROBO Rho GTPase-activating protein 2;SLIT-ROBO Rho GTPase-activating protein 2B;SLIT-ROBO Rho GTPase-activating protein 2C	SRGAP2;SRGAP2B;SRGAP2C	SLIT-ROBO Rho GTPase-activating protein 2;SLIT-ROBO Rho GTPase-activating protein 2B;SLIT-ROBO Rho GTPase-activating protein 2C	4	7	7	7	5	4	3	2	3	3	7	5	4	3	6	4	2	0	1	1	1	0	0	1	0	1	0	0	0	0	2	2	1	3	1	0	2	2	1	1	1	2
O75054	O75054	27	27	27	Immunoglobulin superfamily member 3	IGSF3	Immunoglobulin superfamily member 3	1	27	27	27	17	18	20	11	17	19	21	17	20	22	20	19	24	20	22	22	23	22	23	23	22	23	22	22	0	1	1	0	1	3	1	0	1	0	1	3	0	1
O75063	O75063	4	4	4	Glycosaminoglycan xylosylkinase	FAM20B	Glycosaminoglycan xylosylkinase	1	4	4	4	0	0	0	0	0	0	0	0	0	0	0	0	3	3	3	3	3	3	2	2	3	3	3	4	2	1	1	1	1	0	1	2	1	1	1	1	0	0
O75083	O75083	19	19	19	WD repeat-containing protein 1	WDR1	WD repeat-containing protein 1	1	19	19	19	10	8	9	8	8	9	10	10	8	7	9	8	3	1	3	3	6	4	4	4	3	6	3	2	13	15	14	16	15	16	15	15	15	11	14	14	4	5
O75084;Q14332;Q9UP38	O75084;Q14332	4;3;1	4;3;1	4;3;1	Frizzled-7;Frizzled-2	FZD7;FZD2	Frizzled-7;Frizzled-2	3	4	4	4	4	4	4	4	4	4	4	4	4	4	4	4	0	0	0	0	0	0	0	0	0	0	1	0	0	0	0	0	0	0	0	0	0	0	0	1	0	1
O75110	O75110	2	2	2	Probable phospholipid-transporting ATPase IIA	ATP9A	Probable phospholipid-transporting ATPase IIA	1	2	2	2	0	0	0	0	0	0	0	0	0	0	0	0	0	0	1	0	0	0	0	0	0	0	0	0	0	0	0	0	0	0	0	0	0	0	0	0	0	0
O75131;Q96A23;O95741;Q9UBL6	O75131	23;1;1;1	22;0;0;0	22;0;0;0	Copine-3	CPNE3	Copine-3	4	23	22	22	13	17	17	15	15	17	15	16	19	16	16	18	16	15	14	18	16	14	16	14	18	18	16	13	17	18	18	16	16	15	14	14	15	16	18	17	11	11
O75165	O75165	15	15	15	DnaJ homolog subfamily C member 13	DNAJC13	DnaJ homolog subfamily C member 13	1	15	15	15	1	1	0	1	0	0	1	1	1	1	1	1	8	6	7	10	11	8	6	8	8	9	7	4	1	3	3	2	1	3	0	3	2	2	1	3	1	0
O75190;Q8WWF6	O75190	3;1	3;1	3;1	DnaJ homolog subfamily B member 6	DNAJB6	DnaJ homolog subfamily B member 6	2	3	3	3	1	2	2	1	2	1	2	1	1	1	1	2	1	0	0	1	1	0	0	0	0	0	0	0	0	0	0	0	0	0	0	0	0	0	0	0	0	0
O75223	O75223	3	3	3	Gamma-glutamylcyclotransferase	GGCT	Gamma-glutamylcyclotransferase	1	3	3	3	1	2	2	2	2	3	2	2	2	2	2	2	0	0	0	0	0	0	0	0	0	0	0	0	1	0	0	0	0	1	0	1	0	0	1	0	0	0
O75306	O75306	4	4	4	NADH dehydrogenase [ubiquinone] iron-sulfur protein 2, mitochondrial	NDUFS2	NADH dehydrogenase [ubiquinone] iron-sulfur protein 2, mitochondrial	1	4	4	4	0	0	0	0	0	0	0	0	0	0	0	0	0	0	0	0	0	0	0	0	0	0	0	0	0	0	0	0	0	0	0	0	0	0	0	0	3	4
O75340	O75340	12	12	12	Programmed cell death protein 6	PDCD6	Programmed cell death protein 6	1	12	12	12	9	10	10	9	9	10	12	12	11	10	12	11	10	11	9	11	10	10	12	10	11	12	10	11	10	11	10	10	10	11	9	10	10	11	10	11	5	5
O75347	O75347	6	6	6	Tubulin-specific chaperone A	TBCA	Tubulin-specific chaperone A	1	6	6	6	5	4	3	4	4	5	4	4	4	5	3	5	1	0	0	0	0	0	0	1	0	0	0	0	0	0	0	1	1	0	0	0	0	0	1	0	0	0
O75348	O75348	1	1	1	V-type proton ATPase subunit G 1	ATP6V1G1	V-type proton ATPase subunit G 1	1	1	1	1	0	0	0	0	0	0	0	1	1	0	1	1	0	0	0	0	0	0	0	0	0	0	0	0	0	0	0	0	0	0	0	0	0	0	0	0	0	0
O75351;Q6PIW4	O75351	15;1	14;0	14;0	Vacuolar protein sorting-associated protein 4B	VPS4B	Vacuolar protein sorting-associated protein 4B	2	15	14	14	14	14	13	11	12	12	14	15	14	13	13	14	9	7	7	8	10	9	7	6	8	8	7	8	2	5	4	2	3	5	4	3	3	6	4	4	3	3
O75352	O75352	4	4	4	Mannose-P-dolichol utilization defect 1 protein	MPDU1	Mannose-P-dolichol utilization defect 1 protein	1	4	4	4	3	3	3	3	2	3	3	3	3	3	4	4	4	4	3	4	4	3	3	4	4	4	4	4	4	3	4	2	4	2	3	4	3	3	3	4	3	3
O75366;P09327	O75366	7;1	7;1	7;1	Advillin	AVIL	Advillin	2	7	7	7	0	0	0	0	0	0	0	0	0	0	0	0	0	0	0	0	0	0	0	0	0	0	0	0	6	4	5	6	6	5	5	7	7	3	6	5	1	1
O75367	O75367	12	12	10	Core histone macro-H2A.1	H2AFY	Core histone macro-H2A.1	1	12	12	10	7	9	10	6	6	6	7	8	7	7	7	6	6	6	6	7	9	8	7	7	10	8	7	5	4	4	3	4	4	4	3	4	4	4	6	5	1	1
O75368	O75368	3	3	3	SH3 domain-binding glutamic acid-rich-like protein	SH3BGRL	SH3 domain-binding glutamic acid-rich-like protein	1	3	3	3	3	0	3	2	2	3	2	2	2	1	2	2	0	0	0	0	0	0	0	0	0	0	0	0	0	0	1	0	0	0	0	0	0	0	0	1	0	0
O75369	O75369	50	45	43	Filamin-B	FLNB	Filamin-B	1	50	45	43	4	6	5	4	4	4	5	10	5	4	5	6	6	5	3	5	9	3	5	5	2	10	7	5	15	16	16	15	23	22	24	14	21	12	18	23	31	30
O75390	O75390	9	9	9	Citrate synthase, mitochondrial	CS	Citrate synthase, mitochondrial	1	9	9	9	0	0	0	0	0	1	0	0	0	1	2	0	0	0	0	0	0	0	0	0	0	0	0	0	1	2	1	1	1	2	1	1	1	1	3	0	7	6
O75396	O75396	3	3	3	Vesicle-trafficking protein SEC22b	SEC22B	Vesicle-trafficking protein SEC22b	1	3	3	3	1	1	2	2	2	1	2	1	1	2	2	1	2	2	2	2	2	2	2	2	2	2	2	1	0	0	0	0	0	0	0	0	1	0	1	1	1	1
O75439	O75439	6	6	6	Mitochondrial-processing peptidase subunit beta	PMPCB	Mitochondrial-processing peptidase subunit beta	1	6	6	6	0	0	0	0	0	0	0	0	0	0	0	0	0	0	0	0	0	0	0	0	0	0	0	0	0	0	0	0	0	0	0	0	0	0	0	0	4	4
O75477	O75477	9	9	7	Erlin-1	ERLIN1	Erlin-1	1	9	9	7	2	2	2	2	2	3	4	4	3	3	3	3	4	4	3	4	4	4	5	4	3	5	4	5	4	4	3	2	4	3	2	3	2	3	1	2	4	4
O75487	O75487	19	19	17	Glypican-4;Secreted glypican-4	GPC4	Glypican-4	1	19	19	17	16	15	18	16	16	17	16	17	17	15	15	17	1	2	1	2	1	2	2	1	11	2	2	1	0	0	0	0	0	0	0	0	0	2	0	1	1	1
O75489	O75489	6	6	6	NADH dehydrogenase [ubiquinone] iron-sulfur protein 3, mitochondrial	NDUFS3	NADH dehydrogenase [ubiquinone] iron-sulfur protein 3, mitochondrial	1	6	6	6	1	1	1	1	1	1	0	0	1	1	1	1	0	0	0	0	0	0	0	0	0	1	0	0	0	0	0	0	0	1	0	1	0	0	0	0	5	4
O75494	O75494	1	1	1	Serine/arginine-rich splicing factor 10	SRSF10	Serine/arginine-rich splicing factor 10	1	1	1	1	0	0	0	0	0	0	0	0	0	0	0	1	1	1	0	1	1	1	1	1	1	1	1	1	0	0	0	0	0	0	0	0	0	0	0	0	0	0
O75503	O75503	1	1	1	Ceroid-lipofuscinosis neuronal protein 5	CLN5	Ceroid-lipofuscinosis neuronal protein 5	1	1	1	1	0	0	0	0	0	0	0	0	0	0	0	0	0	0	0	0	0	0	0	0	0	0	0	0	0	0	0	0	0	0	0	0	0	0	0	0	0	0
O75521	O75521	4	4	4	Enoyl-CoA delta isomerase 2, mitochondrial	ECI2	Enoyl-CoA delta isomerase 2	1	4	4	4	0	0	0	0	0	0	0	0	0	0	0	0	0	0	0	2	0	0	0	0	1	0	1	0	1	0	0	0	0	0	1	1	0	0	1	1	3	3
O75531;Q5JUR7	O75531	11;1	11;1	11;1	Barrier-to-autointegration factor;Barrier-to-autointegration factor, N-terminally processed	BANF1	Barrier-to-autointegration factor	2	11	11	11	9	11	10	10	11	8	8	8	9	8	9	7	8	8	9	8	9	9	9	8	11	10	9	9	5	6	5	5	5	5	6	5	5	5	4	4	1	3
O75533	O75533	5	5	5	Splicing factor 3B subunit 1	SF3B1	Splicing factor 3B subunit 1	1	5	5	5	0	1	1	0	0	2	0	1	0	0	0	0	4	3	2	3	3	3	3	4	4	3	3	2	1	1	1	1	1	1	2	1	1	1	2	1	0	0
O75592	O75592	2	2	2	E3 ubiquitin-protein ligase MYCBP2	MYCBP2	E3 ubiquitin-protein ligase MYCBP2	1	2	2	2	0	0	0	0	0	0	0	0	0	0	0	0	0	0	0	0	0	0	0	0	0	0	0	0	1	1	1	2	1	1	1	1	1	1	1	1	1	1
O75608	O75608	2	2	2	Acyl-protein thioesterase 1	LYPLA1	Acyl-protein thioesterase 1	1	2	2	2	1	0	2	0	0	0	1	2	1	1	1	1	0	0	0	0	0	0	0	1	0	0	0	0	1	1	2	2	2	2	1	2	1	1	2	1	1	0
O75629	O75629	1	1	1	Protein CREG1	CREG1	Protein CREG1	1	1	1	1	1	1	0	1	1	0	1	1	1	1	1	1	0	0	0	0	0	0	0	0	0	0	0	0	1	1	1	1	0	1	1	1	1	1	1	1	0	0
O75643	O75643	39	39	39	U5 small nuclear ribonucleoprotein 200 kDa helicase	SNRNP200	U5 small nuclear ribonucleoprotein 200 kDa helicase	1	39	39	39	7	22	12	4	2	2	20	19	12	8	15	14	24	22	26	28	29	22	28	21	30	25	25	22	17	16	15	14	10	17	11	14	10	7	15	14	3	4
O75674	O75674	6	6	6	TOM1-like protein 1	TOM1L1	TOM1-like protein 1	1	6	6	6	5	3	5	1	5	6	5	5	4	5	5	5	0	0	0	0	0	0	1	0	1	1	0	0	1	2	4	1	4	2	2	1	2	1	1	3	0	1
O75695	O75695	8	8	8	Protein XRP2	RP2	Protein XRP2	1	8	8	8	5	6	8	7	5	5	7	7	6	6	7	6	0	1	0	0	1	0	0	1	0	0	0	0	1	1	1	0	0	0	3	0	0	1	1	0	1	2
O75712	O75712	1	1	1	Gap junction beta-3 protein	GJB3	Gap junction beta-3 protein	1	1	1	1	0	0	0	0	0	0	0	0	0	0	0	0	0	0	0	0	0	0	0	0	0	0	0	0	0	1	1	1	0	0	1	1	1	1	1	1	0	1
O75781	O75781	3	3	3	Paralemmin-1	PALM	Paralemmin-1	1	3	3	3	1	2	3	3	2	3	3	2	3	2	2	2	0	1	0	0	0	0	0	0	0	0	0	0	0	0	0	0	0	0	0	0	0	0	0	0	0	0
O75787	O75787	6	6	6	Renin receptor	ATP6AP2	Renin receptor	1	6	6	6	1	1	1	1	1	1	1	3	2	1	2	1	3	1	2	3	3	3	2	2	3	3	4	2	1	2	1	2	1	1	1	1	1	0	2	2	2	3
O75844	O75844	9	9	9	CAAX prenyl protease 1 homolog	ZMPSTE24	CAAX prenyl protease 1 homolog	1	9	9	9	1	5	2	2	0	1	4	5	3	2	2	3	5	4	5	8	7	7	4	3	6	5	6	3	8	6	6	4	5	5	5	7	2	7	4	4	3	3
O75874	O75874	12	12	11	Isocitrate dehydrogenase [NADP] cytoplasmic	IDH1	Isocitrate dehydrogenase [NADP] cytoplasmic	1	12	12	11	6	7	6	3	6	6	5	9	9	7	6	6	3	2	2	5	5	2	3	5	3	5	3	3	11	11	10	5	10	10	8	10	10	8	9	9	7	8
O75882	O75882	12	12	12	Attractin	ATRN	Attractin	1	12	12	12	5	6	8	2	4	5	4	9	6	6	8	7	1	0	2	3	2	2	2	1	0	1	2	1	10	8	8	10	9	9	11	8	10	7	10	9	2	2
O75915	O75915	4	4	4	PRA1 family protein 3	ARL6IP5	PRA1 family protein 3	1	4	4	4	3	3	3	1	2	2	2	3	1	2	2	2	3	2	2	1	1	2	2	1	3	1	1	3	3	2	2	3	2	2	3	3	2	3	3	2	2	2
O75947	O75947	9	9	9	ATP synthase subunit d, mitochondrial	ATP5H	ATP synthase subunit d, mitochondrial	1	9	9	9	0	1	0	1	0	0	0	0	0	0	0	1	0	0	0	0	0	0	0	0	0	1	0	0	1	0	0	0	0	0	1	0	0	0	0	0	8	8
O75954	O75954	5	5	5	Tetraspanin-9	TSPAN9	Tetraspanin-9	1	5	5	5	5	4	5	5	5	5	5	4	5	5	5	5	1	0	2	1	1	0	1	2	2	1	2	1	3	4	4	4	4	4	4	4	4	4	4	4	0	1
O75955	O75955	17	17	17	Flotillin-1	FLOT1	Flotillin-1	1	17	17	17	8	10	12	7	11	10	13	11	13	11	12	12	10	9	11	9	14	10	11	9	11	13	11	10	3	5	3	5	4	5	4	6	7	7	5	5	6	5
O75976	O75976	18	18	18	Carboxypeptidase D	CPD	Carboxypeptidase D	1	18	18	18	11	11	9	5	9	10	11	11	11	8	11	11	11	4	9	11	7	9	4	6	4	7	6	5	9	11	11	11	11	9	8	10	9	12	9	10	9	7
O76003	O76003	4	4	4	Glutaredoxin-3	GLRX3	Glutaredoxin-3	1	4	4	4	2	2	2	2	1	2	3	3	3	2	2	2	0	0	0	0	0	1	0	0	0	1	0	0	0	0	2	0	1	0	1	0	0	1	1	2	0	0
O76021	O76021	5	5	5	Ribosomal L1 domain-containing protein 1	RSL1D1	Ribosomal L1 domain-containing protein 1	1	5	5	5	1	2	1	0	0	1	1	0	1	1	1	1	4	2	3	4	4	3	3	2	5	3	3	3	4	2	2	2	1	2	3	4	2	2	1	2	0	0
O76082	O76082	2	2	2	Solute carrier family 22 member 5	SLC22A5	Solute carrier family 22 member 5	1	2	2	2	0	1	1	1	1	1	1	2	2	1	1	1	1	0	0	1	2	1	1	0	1	2	1	1	1	1	1	1	2	1	1	1	1	1	1	1	1	1
O76094	O76094	2	2	2	Signal recognition particle subunit SRP72	SRP72	Signal recognition particle subunit SRP72	1	2	2	2	0	0	0	0	1	1	1	1	1	1	1	1	2	1	2	1	2	2	1	1	1	2	2	1	1	0	1	0	0	0	1	0	0	0	0	0	0	0
O94760	O94760	10	10	9	N(G),N(G)-dimethylarginine dimethylaminohydrolase 1	DDAH1	N(G),N(G)-dimethylarginine dimethylaminohydrolase 1	1	10	10	9	8	8	8	5	7	8	7	7	7	8	6	8	2	1	1	0	1	0	0	0	0	0	0	0	1	1	0	0	1	0	0	0	0	1	0	0	0	0
O94776;Q9BTC8	O94776	3;1	3;1	2;0	Metastasis-associated protein MTA2	MTA2	Metastasis-associated protein MTA2	2	3	3	2	0	0	0	0	0	0	0	0	0	1	0	0	3	2	2	2	0	1	2	2	1	2	1	2	0	0	0	0	0	0	0	1	0	0	1	0	0	0
O94804	O94804	6	6	5	Serine/threonine-protein kinase 10	STK10	Serine/threonine-protein kinase 10	1	6	6	5	2	2	1	0	0	1	3	3	3	3	2	3	2	2	1	1	1	1	1	2	2	0	2	2	1	0	0	1	0	0	1	0	0	0	0	1	1	3
O94813	O94813	32	32	32	Slit homolog 2 protein;Slit homolog 2 protein N-product;Slit homolog 2 protein C-product	SLIT2	Slit homolog 2 protein	1	32	32	32	26	31	30	25	23	23	28	28	26	23	25	26	0	0	0	0	0	0	0	0	3	0	0	0	1	0	0	0	0	0	0	1	0	0	0	0	1	1
O94826	O94826	2	2	2	Mitochondrial import receptor subunit TOM70	TOMM70A	Mitochondrial import receptor subunit TOM70	1	2	2	2	0	0	0	0	0	0	0	1	0	0	0	1	0	0	0	0	0	0	0	0	0	0	0	0	0	0	0	0	0	1	0	0	0	0	0	0	0	0
O94832;B0I1T2	O94832	22;1	22;1	22;1	Unconventional myosin-Id	MYO1D	Unconventional myosin-Id	2	22	22	22	6	11	7	3	2	3	13	14	11	8	7	7	5	4	6	7	7	7	5	5	6	6	5	3	1	4	3	5	5	1	3	4	2	3	4	3	8	9
O94901	O94901	6	6	6	SUN domain-containing protein 1	SUN1	SUN domain-containing protein 1	1	6	6	6	0	0	0	0	0	0	0	0	0	0	0	0	0	2	1	0	1	1	0	0	1	1	0	0	1	0	1	0	0	0	0	2	0	2	1	1	3	3
O94905	O94905	6	4	4	Erlin-2	ERLIN2	Erlin-2	1	6	4	4	3	4	3	3	2	3	6	5	4	3	5	4	3	2	2	3	3	2	2	2	3	2	2	2	4	3	2	2	4	4	2	3	3	3	4	3	5	5
O94906	O94906	12	12	12	Pre-mRNA-processing factor 6	PRPF6	Pre-mRNA-processing factor 6	1	12	12	12	2	5	0	1	0	0	4	3	1	3	2	2	6	4	3	8	6	6	6	6	10	5	9	3	0	0	1	1	0	1	2	3	0	1	1	1	0	0
O94907;Q9UBU2	O94907	5;1	5;1	5;1	Dickkopf-related protein 1	DKK1	Dickkopf-related protein 1	2	5	5	5	0	0	0	0	0	0	0	0	0	0	0	0	4	2	4	4	5	5	5	5	4	4	4	4	1	1	1	1	1	2	1	1	1	2	1	2	0	1
O94919	O94919	7	7	7	Endonuclease domain-containing 1 protein	ENDOD1	Endonuclease domain-containing 1 protein	1	7	7	7	0	1	3	0	0	1	2	2	0	1	2	1	4	3	3	4	4	4	4	3	5	4	4	2	5	4	5	4	5	4	2	4	4	4	2	3	0	0
O94955	O94955	2	2	2	Rho-related BTB domain-containing protein 3	RHOBTB3	Rho-related BTB domain-containing protein 3	1	2	2	2	0	0	0	0	0	0	0	1	0	0	0	0	2	1	1	2	2	0	1	2	0	2	1	1	0	0	0	0	0	0	0	0	0	0	0	0	0	0
O94979	O94979	1	1	1	Protein transport protein Sec31A	SEC31A	Protein transport protein Sec31A	1	1	1	1	0	0	0	0	0	0	0	0	0	0	0	0	0	0	0	0	0	0	0	0	0	0	0	0	0	0	0	0	0	0	0	1	0	0	0	0	0	0
O94991	O94991	3	3	3	SLIT and NTRK-like protein 5	SLITRK5	SLIT and NTRK-like protein 5	1	3	3	3	2	2	3	0	2	2	2	3	3	2	1	2	0	0	0	0	0	0	0	0	0	0	0	0	0	0	0	0	0	0	0	0	0	0	0	1	0	0
O95070	O95070	3	3	3	Protein YIF1A	YIF1A	Protein YIF1A	1	3	3	3	0	0	0	0	0	0	0	0	0	0	0	0	2	2	2	2	3	2	3	2	3	3	3	3	0	1	0	0	1	0	0	2	0	1	0	0	0	1
O95071	O95071	4	4	4	E3 ubiquitin-protein ligase UBR5	UBR5	E3 ubiquitin-protein ligase UBR5	1	4	4	4	0	1	0	0	0	0	0	0	0	0	0	0	1	1	2	2	2	1	3	4	2	2	2	0	1	1	2	1	1	1	0	1	2	0	0	0	0	0
O95084	O95084	7	7	7	Serine protease 23	PRSS23	Serine protease 23	1	7	7	7	2	5	3	2	1	2	3	2	2	3	3	2	5	3	5	4	5	5	5	5	4	5	4	4	0	0	0	0	0	0	0	0	0	0	0	0	0	0
O95163	O95163	2	2	2	Elongator complex protein 1	IKBKAP	Elongator complex protein 1	1	2	2	2	1	1	1	1	1	1	1	1	1	1	1	1	1	1	1	1	1	1	1	1	1	1	1	1	1	0	0	0	0	0	0	0	0	0	0	0	0	0
O95164	O95164	3	3	3	Ubiquitin-like protein 3	UBL3	Ubiquitin-like protein 3	1	3	3	3	0	0	0	0	0	0	0	1	2	0	0	0	1	1	2	1	1	1	2	1	2	2	1	2	0	0	0	0	0	0	0	0	0	0	0	0	0	0
Q9H0R8;O95166	Q9H0R8;O95166	2;2	2;2	1;1	Gamma-aminobutyric acid receptor-associated protein-like 1;Gamma-aminobutyric acid receptor-associated protein	GABARAPL1;GABARAP	Gamma-aminobutyric acid receptor-associated protein-like 1;Gamma-aminobutyric acid receptor-associated protein	2	2	2	1	0	1	1	1	0	0	1	1	2	0	2	1	0	0	0	0	0	0	0	0	0	1	0	0	0	0	0	0	0	0	0	0	0	0	0	0	0	0
O95168	O95168	1	1	1	NADH dehydrogenase [ubiquinone] 1 beta subcomplex subunit 4	NDUFB4	NADH dehydrogenase [ubiquinone] 1 beta subcomplex subunit 4	1	1	1	1	0	0	0	0	0	0	0	0	0	0	0	0	0	0	0	0	0	0	0	0	0	0	0	0	0	0	0	0	0	0	0	0	0	0	0	0	1	1
O95169	O95169	3	3	3	NADH dehydrogenase [ubiquinone] 1 beta subcomplex subunit 8, mitochondrial	NDUFB8	NADH dehydrogenase [ubiquinone] 1 beta subcomplex subunit 8, mitochondrial	1	3	3	3	0	0	0	0	0	0	0	0	0	0	0	0	0	0	0	0	0	0	0	0	0	0	0	0	0	0	0	0	0	0	0	0	0	0	0	0	2	2
O95196	O95196	7	7	6	Chondroitin sulfate proteoglycan 5	CSPG5	Chondroitin sulfate proteoglycan 5	1	7	7	6	5	3	6	4	5	5	5	5	7	6	6	6	0	1	0	1	1	1	1	1	0	1	1	0	0	0	0	0	0	0	0	0	0	0	0	0	0	0
O95197	O95197	4	4	4	Reticulon-3	RTN3	Reticulon-3	1	4	4	4	2	1	2	1	2	2	2	2	2	2	2	1	3	3	3	3	3	3	3	3	2	3	3	3	2	2	2	2	1	2	2	2	2	1	2	2	1	1
O95202	O95202	6	6	6	LETM1 and EF-hand domain-containing protein 1, mitochondrial	LETM1	Mitochondrial proton/calcium exchanger protein	1	6	6	6	0	0	0	0	0	0	0	0	0	0	0	0	0	0	0	0	0	0	0	0	0	1	0	0	0	1	0	0	0	0	0	0	0	0	0	0	2	4
O95214	O95214	1	1	1	Leptin receptor overlapping transcript-like 1	LEPROTL1	Leptin receptor overlapping transcript-like 1	1	1	1	1	0	0	1	0	0	0	1	0	0	0	0	0	0	0	0	0	0	0	0	0	0	0	0	0	0	0	1	1	1	1	0	0	0	0	0	0	0	0
O95235	O95235	5	5	5	Kinesin-like protein KIF20A	KIF20A	Kinesin-like protein KIF20A	1	5	5	5	2	1	1	0	0	0	3	4	2	1	3	2	0	0	0	0	1	1	0	0	0	0	0	1	0	0	0	0	0	0	0	0	0	0	0	0	0	0
O95274	O95274	2	2	2	Ly6/PLAUR domain-containing protein 3	LYPD3	Ly6/PLAUR domain-containing protein 3	1	2	2	2	0	0	0	0	0	0	0	0	0	0	0	0	1	1	1	2	2	2	1	2	2	2	2	1	1	1	0	1	1	1	1	1	0	0	0	1	0	0
O95297	O95297	7	7	7	Myelin protein zero-like protein 1	MPZL1	Myelin protein zero-like protein 1	1	7	7	7	7	7	7	6	6	6	6	7	7	7	7	7	3	5	5	4	4	4	5	5	4	4	4	4	4	5	6	5	6	6	5	6	5	4	6	6	4	4
O95298;E9PQ53	O95298;E9PQ53	2;1	2;1	2;1	NADH dehydrogenase [ubiquinone] 1 subunit C2;NADH dehydrogenase [ubiquinone] 1 subunit C2, isoform 2	NDUFC2;NDUFC2-KCTD14	NADH dehydrogenase [ubiquinone] 1 subunit C2;NADH dehydrogenase [ubiquinone] 1 subunit C2, isoform 2	2	2	2	2	0	0	0	0	0	0	0	0	0	0	0	0	0	0	0	0	0	0	0	0	0	0	0	0	0	0	0	0	0	0	0	0	0	0	0	0	1	0
O95299	O95299	3	3	3	NADH dehydrogenase [ubiquinone] 1 alpha subcomplex subunit 10, mitochondrial	NDUFA10	NADH dehydrogenase [ubiquinone] 1 alpha subcomplex subunit 10, mitochondrial	1	3	3	3	0	0	0	0	0	0	0	0	0	0	0	0	0	0	0	0	0	0	0	0	0	0	0	0	0	0	0	0	0	0	0	0	0	0	0	0	1	1
O95347	O95347	2	2	2	Structural maintenance of chromosomes protein 2	SMC2	Structural maintenance of chromosomes protein 2	1	2	2	2	0	0	0	0	0	0	0	0	0	0	0	0	0	0	0	0	0	0	0	0	2	0	0	0	0	0	0	0	0	0	0	0	0	0	0	0	0	0
O95373	O95373	7	7	7	Importin-7	IPO7	Importin-7	1	7	7	7	3	5	2	1	1	2	4	4	4	3	3	3	4	2	4	4	4	3	2	2	3	3	3	3	4	3	4	4	3	4	4	5	4	4	5	4	1	3
O95379	O95379	2	2	2	Tumor necrosis factor alpha-induced protein 8	TNFAIP8	Tumor necrosis factor alpha-induced protein 8	1	2	2	2	0	1	1	0	0	1	1	1	1	1	1	1	0	0	0	0	0	0	0	0	0	0	0	0	0	0	0	0	1	0	0	0	0	0	0	0	0	0
O95415	O95415	1	1	1	Brain protein I3	BRI3	Brain protein I3	1	1	1	1	0	1	1	0	0	1	1	1	1	1	1	1	1	1	1	1	1	1	1	1	1	1	1	1	0	0	0	0	0	0	0	0	0	0	0	0	0	1
O95433	O95433	2	2	2	Activator of 90 kDa heat shock protein ATPase homolog 1	AHSA1	Activator of 90 kDa heat shock protein ATPase homolog 1	1	2	2	2	1	1	1	0	0	0	1	1	1	1	1	1	0	0	0	0	0	0	0	0	0	0	0	0	0	1	0	0	1	1	0	0	0	0	0	0	0	0
O95470	O95470	2	2	2	Sphingosine-1-phosphate lyase 1	SGPL1	Sphingosine-1-phosphate lyase 1	1	2	2	2	0	1	0	0	0	0	0	1	0	0	1	0	0	1	1	1	1	0	1	0	1	1	2	1	1	0	0	0	1	0	0	0	1	1	0	0	0	0
O95471	O95471	2	2	2	Claudin-7	CLDN7	Claudin-7	1	2	2	2	1	0	0	0	0	0	0	1	0	0	1	1	1	1	1	1	1	1	1	1	1	1	1	1	2	1	1	1	2	1	1	0	0	1	1	1	1	1
O95479	O95479	3	3	3	GDH/6PGL endoplasmic bifunctional protein;Glucose 1-dehydrogenase;6-phosphogluconolactonase	H6PD	GDH/6PGL endoplasmic bifunctional protein	1	3	3	3	0	0	0	0	0	0	0	0	0	0	0	0	0	0	0	0	0	0	0	0	0	0	0	0	0	0	0	0	0	0	0	0	0	0	0	0	2	1
O95490;O94910	O95490	24;1	24;1	24;1	Latrophilin-2	LPHN2	Adhesion G protein-coupled receptor L2	2	24	24	24	16	16	20	14	14	19	15	15	16	20	17	18	1	1	1	1	1	2	1	1	1	1	1	1	0	1	0	0	0	1	0	0	0	0	1	1	0	0
O95562	O95562	1	1	1	Vesicle transport protein SFT2B	SFT2D2	Vesicle transport protein SFT2B	1	1	1	1	0	1	0	1	1	1	1	1	1	1	1	0	0	0	0	0	0	0	0	0	0	0	0	0	0	0	0	0	0	0	0	0	0	0	0	0	0	0
O95573	O95573	19	19	17	Long-chain-fatty-acid--CoA ligase 3	ACSL3	Long-chain-fatty-acid--CoA ligase 3	1	19	19	17	3	6	2	1	0	2	3	4	4	1	5	3	10	8	9	10	8	11	9	5	7	8	6	8	12	10	6	4	8	5	6	9	2	11	6	9	12	12
O95630	O95630	6	6	6	STAM-binding protein	STAMBP	STAM-binding protein	1	6	6	6	4	3	4	6	5	4	6	6	4	5	5	6	1	0	0	1	1	0	0	0	1	0	0	0	0	0	0	1	0	0	0	0	0	0	0	1	0	0
O95716	O95716	8	6	4	Ras-related protein Rab-3D	RAB3D	Ras-related protein Rab-3D	1	8	6	4	1	1	1	1	1	1	1	1	1	1	1	2	7	4	6	7	7	7	5	5	4	8	6	5	3	1	3	6	2	3	2	3	2	3	3	0	3	2
O95721	O95721	3	3	3	Synaptosomal-associated protein 29	SNAP29	Synaptosomal-associated protein 29	1	3	3	3	2	2	3	2	1	3	1	3	2	3	2	3	1	1	1	1	1	0	1	1	1	1	1	1	0	0	0	1	0	0	0	0	0	0	0	0	0	0
O95747	O95747	3	3	3	Serine/threonine-protein kinase OSR1	OXSR1	Serine/threonine-protein kinase OSR1	1	3	3	3	0	1	0	0	0	0	2	3	2	3	2	3	0	1	0	0	0	0	0	1	1	1	0	0	0	0	1	1	0	1	1	0	0	0	1	0	0	0
O95757	O95757	6	2	2	Heat shock 70 kDa protein 4L	HSPA4L	Heat shock 70 kDa protein 4L	1	6	2	2	1	2	2	1	2	2	5	4	3	2	3	3	1	0	1	1	1	1	0	0	0	1	1	0	1	1	0	2	1	2	1	1	0	0	2	0	1	0
O95782;O94973	O95782	16;6	16;6	16;6	AP-2 complex subunit alpha-1	AP2A1	AP-2 complex subunit alpha-1	2	16	16	16	9	10	7	2	2	8	9	11	9	8	7	7	6	4	5	8	7	6	6	5	4	8	5	6	5	2	2	3	2	5	3	4	3	3	7	5	3	2
O95819;Q9NRD5	O95819	29;1	29;1	19;1	Mitogen-activated protein kinase kinase kinase kinase 4	MAP4K4	Mitogen-activated protein kinase kinase kinase kinase 4	2	29	29	19	15	24	23	11	13	18	21	24	25	23	20	21	8	4	4	8	5	3	8	5	6	6	5	2	2	4	5	5	5	5	5	1	4	5	4	4	1	1
O95831	O95831	1	1	1	Apoptosis-inducing factor 1, mitochondrial	AIFM1	Apoptosis-inducing factor 1, mitochondrial	1	1	1	1	0	1	0	0	0	0	0	1	0	0	0	0	0	0	0	0	0	0	0	0	0	0	0	0	0	0	0	0	0	0	0	0	0	0	0	0	0	1
O95832	O95832	2	2	2	Claudin-1	CLDN1	Claudin-1	1	2	2	2	0	0	0	0	0	0	0	0	0	0	0	0	0	0	0	0	0	0	0	0	0	0	0	0	0	1	1	0	2	1	1	0	1	2	0	2	0	0
O95834	O95834	4	4	4	Echinoderm microtubule-associated protein-like 2	EML2	Echinoderm microtubule-associated protein-like 2	1	4	4	4	2	2	2	1	2	2	2	2	2	3	2	1	0	0	1	1	1	0	0	2	1	2	1	1	1	0	0	0	0	1	0	1	1	1	0	0	0	0
O95857	O95857	2	2	2	Tetraspanin-13	TSPAN13	Tetraspanin-13	1	2	2	2	1	1	1	1	1	1	1	1	1	1	1	1	2	2	2	2	2	2	2	2	1	2	2	2	1	0	1	1	1	1	1	1	0	1	1	1	0	0
O95858	O95858	3	3	3	Tetraspanin-15	TSPAN15	Tetraspanin-15	1	3	3	3	2	2	2	2	2	2	2	2	2	2	2	2	2	3	3	3	3	3	3	3	2	3	2	3	0	0	0	0	0	0	0	0	0	0	0	0	0	0
O95861	O95861	4	4	4	3(2),5-bisphosphate nucleotidase 1	BPNT1	3(2),5-bisphosphate nucleotidase 1	1	4	4	4	2	0	1	1	1	1	2	2	2	0	2	2	0	0	0	0	0	0	0	0	0	0	0	0	0	1	0	1	1	1	0	1	0	0	0	1	1	2
O95864	O95864	5	5	5	Fatty acid desaturase 2	FADS2	Acyl-CoA 6-desaturase	1	5	5	5	0	0	0	0	0	0	0	0	0	0	0	0	0	0	0	0	0	0	0	0	0	0	0	0	2	1	2	2	1	1	1	2	2	2	1	1	4	4
O95865	O95865	5	4	4	N(G),N(G)-dimethylarginine dimethylaminohydrolase 2	DDAH2	N(G),N(G)-dimethylarginine dimethylaminohydrolase 2	1	5	4	4	4	5	4	4	3	4	5	5	4	4	4	5	2	0	0	1	1	1	2	0	0	2	1	1	0	0	0	0	0	0	0	0	0	0	0	0	0	0
O95881	O95881	5	5	5	Thioredoxin domain-containing protein 12	TXNDC12	Thioredoxin domain-containing protein 12	1	5	5	5	1	2	2	1	1	1	2	2	2	0	1	1	1	2	2	2	2	1	1	0	1	1	1	2	2	1	1	2	1	1	1	1	1	3	2	1	4	4
O96000	O96000	3	3	3	NADH dehydrogenase [ubiquinone] 1 beta subcomplex subunit 10	NDUFB10	NADH dehydrogenase [ubiquinone] 1 beta subcomplex subunit 10	1	3	3	3	0	0	1	0	0	0	0	0	0	0	0	0	0	0	0	0	0	1	1	0	0	0	0	0	0	0	0	0	0	0	0	0	0	0	0	0	3	3
O96005	O96005	10	10	10	Cleft lip and palate transmembrane protein 1	CLPTM1	Cleft lip and palate transmembrane protein 1	1	10	10	10	0	0	0	0	0	0	0	0	0	0	0	0	7	5	6	7	6	6	5	3	6	8	6	8	5	2	3	1	1	1	2	6	2	3	1	2	5	6
O96008	O96008	5	5	5	Mitochondrial import receptor subunit TOM40 homolog	TOMM40	Mitochondrial import receptor subunit TOM40 homolog	1	5	5	5	0	0	0	0	0	0	0	0	0	0	0	0	0	0	0	0	0	0	0	0	0	0	0	1	0	1	0	0	0	0	0	1	0	0	0	0	3	3
O96011	O96011	8	8	8	Peroxisomal membrane protein 11B	PEX11B	Peroxisomal membrane protein 11B	1	8	8	8	1	1	0	0	0	1	1	2	0	0	0	0	4	3	4	4	5	4	3	3	3	3	2	1	0	0	0	0	0	0	0	0	0	0	0	0	3	4
P00156	P00156	1	1	1	Cytochrome b	MT-CYB	Cytochrome b	1	1	1	1	0	0	0	0	0	0	0	0	0	0	0	0	0	0	0	0	0	0	0	0	0	0	0	0	0	0	0	0	0	0	0	0	0	0	0	0	1	0
P00338	P00338	27	27	25	L-lactate dehydrogenase A chain	LDHA	L-lactate dehydrogenase A chain	1	27	27	25	21	22	20	20	21	19	23	22	23	19	24	19	16	14	12	16	17	14	15	15	13	17	15	15	19	17	16	19	19	22	19	17	17	18	19	19	19	18
P00367	P00367	17	17	5	Glutamate dehydrogenase 1, mitochondrial	GLUD1	Glutamate dehydrogenase 1, mitochondrial	1	17	17	5	0	0	0	0	0	1	2	2	2	1	1	0	1	1	0	0	0	0	1	0	0	1	1	0	1	2	0	1	0	1	2	2	2	2	1	0	16	16
P00387	P00387	8	8	8	NADH-cytochrome b5 reductase 3;NADH-cytochrome b5 reductase 3 membrane-bound form;NADH-cytochrome b5 reductase 3 soluble form	CYB5R3	NADH-cytochrome b5 reductase 3	1	8	8	8	2	5	3	1	0	3	4	3	4	4	4	3	6	5	4	8	7	6	5	3	4	4	5	5	6	5	3	3	5	3	2	6	3	4	4	4	4	5
P00390	P00390	3	3	3	Glutathione reductase, mitochondrial	GSR	Glutathione reductase, mitochondrial	1	3	3	3	0	1	0	0	0	0	1	0	1	0	0	0	0	0	1	0	1	1	0	0	0	0	0	0	0	0	0	0	0	0	0	0	0	0	0	0	0	0
P00395	P00395	1	1	1	Cytochrome c oxidase subunit 1	MT-CO1	Cytochrome c oxidase subunit 1	1	1	1	1	0	0	0	0	0	0	0	0	0	0	0	0	0	0	0	0	0	0	0	0	0	0	0	0	0	0	0	0	0	0	0	0	0	0	0	0	1	0
P00403	P00403	3	3	3	Cytochrome c oxidase subunit 2	MT-CO2	Cytochrome c oxidase subunit 2	1	3	3	3	0	1	0	1	0	1	1	1	0	0	1	1	2	2	1	2	2	2	0	1	1	1	1	1	0	0	0	0	0	1	1	2	1	1	1	0	3	3
P00441	P00441	6	6	6	Superoxide dismutase [Cu-Zn]	SOD1	Superoxide dismutase [Cu-Zn]	1	6	6	6	6	6	6	6	6	6	6	6	4	6	6	6	0	1	0	1	1	0	0	0	0	0	0	1	2	1	1	2	3	1	2	2	1	3	1	1	0	0
P00450	P00450	12	12	6	Ceruloplasmin	CP	Ceruloplasmin	1	12	12	6	3	2	1	1	1	1	1	2	2	1	2	1	0	0	1	1	0	0	0	0	1	0	0	0	10	11	10	11	11	11	10	12	10	11	11	11	3	3
P00488;P16452	P00488	8;1	8;1	8;1	Coagulation factor XIII A chain	F13A1	Coagulation factor XIII A chain	2	8	8	8	4	3	3	3	3	4	3	3	3	3	4	3	4	3	5	5	5	6	5	5	5	5	5	3	6	6	7	6	5	6	7	5	6	5	6	7	1	0
P00491	P00491	8	8	8	Purine nucleoside phosphorylase	PNP	Purine nucleoside phosphorylase	1	8	8	8	6	5	6	4	6	6	6	7	6	7	7	7	0	0	0	0	1	0	0	0	0	0	0	0	0	0	0	0	0	0	1	0	0	0	0	3	1	1
P00492	P00492	9	9	9	Hypoxanthine-guanine phosphoribosyltransferase	HPRT1	Hypoxanthine-guanine phosphoribosyltransferase	1	9	9	9	7	9	9	9	9	8	9	8	9	8	9	9	1	1	0	2	1	1	1	1	2	1	1	1	4	4	3	3	3	4	4	5	5	3	4	2	4	2
P00505	P00505	14	14	14	Aspartate aminotransferase, mitochondrial	GOT2	Aspartate aminotransferase, mitochondrial	1	14	14	14	1	0	2	1	2	1	3	1	2	1	3	1	0	0	0	0	0	0	0	0	0	0	0	0	0	0	0	0	0	0	0	1	0	0	0	0	10	7
P00533	P00533	11	11	11	Epidermal growth factor receptor	EGFR	Epidermal growth factor receptor	1	11	11	11	3	3	2	0	2	2	5	7	4	6	3	3	0	0	0	0	0	0	0	0	0	0	0	0	5	4	5	4	5	3	4	6	4	3	3	3	5	6
P00558;P07205	P00558	23;6	23;6	23;6	Phosphoglycerate kinase 1	PGK1	Phosphoglycerate kinase 1	2	23	23	23	17	18	18	16	16	20	19	18	19	17	17	15	10	12	9	12	14	12	12	13	11	10	11	9	18	18	17	18	16	17	18	15	14	12	18	15	12	11
P00734	P00734	16	5	5	Prothrombin;Activation peptide fragment 1;Activation peptide fragment 2;Thrombin light chain;Thrombin heavy chain	F2	Prothrombin	1	16	5	5	8	8	8	8	8	8	9	9	9	8	10	10	9	9	9	9	9	9	9	10	9	9	9	9	11	12	13	12	12	13	13	12	13	13	12	13	6	5
P00736;Q9NZP8	P00736;Q9NZP8	2;1	2;1	2;1	Complement C1r subcomponent;Complement C1r subcomponent heavy chain;Complement C1r subcomponent light chain;Complement C1r subcomponent-like protein	C1R;C1RL	Complement C1r subcomponent;Complement C1r subcomponent-like protein	2	2	2	2	0	0	0	0	0	0	0	0	0	0	0	0	0	0	0	0	0	0	0	0	0	0	0	0	2	2	2	2	2	2	2	2	2	2	2	2	1	2
P00738;P00739	P00738;P00739	7;4	7;4	7;4	Haptoglobin;Haptoglobin alpha chain;Haptoglobin beta chain;Haptoglobin-related protein	HP;HPR	Haptoglobin;Haptoglobin-related protein	2	7	7	7	0	1	0	0	0	0	0	0	2	2	0	1	3	3	3	3	3	2	2	2	2	4	3	4	3	4	4	4	3	4	4	4	5	4	4	4	4	4
P00740	P00740	1	1	1	Coagulation factor IX;Coagulation factor IXa light chain;Coagulation factor IXa heavy chain	F9	Coagulation factor IX	1	1	1	1	0	0	0	0	0	0	0	0	0	0	0	0	0	0	0	0	0	0	0	0	0	0	0	0	1	1	1	1	1	1	1	1	1	1	1	1	0	0
P00742	P00742	4	4	4	Coagulation factor X;Factor X light chain;Factor X heavy chain;Activated factor Xa heavy chain	F10	Coagulation factor X	1	4	4	4	4	1	2	3	3	3	4	3	3	4	2	3	2	2	2	3	4	2	2	2	1	3	2	2	2	2	2	2	2	2	2	2	2	2	2	2	1	0
P00747	P00747	9	2	2	Plasminogen;Plasmin heavy chain A;Activation peptide;Angiostatin;Plasmin heavy chain A, short form;Plasmin light chain B	PLG	Plasminogen	1	9	2	2	3	4	3	4	3	1	3	2	2	2	2	1	2	2	2	2	3	2	2	3	4	2	2	1	6	6	6	6	6	6	5	6	6	6	6	5	3	1
P00749	P00749	5	5	5	Urokinase-type plasminogen activator;Urokinase-type plasminogen activator long chain A;Urokinase-type plasminogen activator short chain A;Urokinase-type plasminogen activator chain B	PLAU	Urokinase-type plasminogen activator	1	5	5	5	0	0	0	0	0	0	1	0	1	0	1	0	0	0	0	0	0	0	0	0	0	0	0	0	1	3	1	1	0	1	1	0	1	2	1	1	0	1
P00750	P00750	1	1	1	Tissue-type plasminogen activator;Tissue-type plasminogen activator chain A;Tissue-type plasminogen activator chain B	PLAT	Tissue-type plasminogen activator	1	1	1	1	0	0	0	0	0	0	0	0	0	0	0	0	0	0	0	0	0	0	0	0	0	0	0	0	0	0	0	0	0	0	0	1	1	0	1	1	0	0
P00918	P00918	8	8	8	Carbonic anhydrase 2	CA2	Carbonic anhydrase 2	1	8	8	8	7	5	7	7	6	7	7	7	7	7	7	7	0	0	0	2	1	1	0	1	0	1	0	1	1	1	2	2	2	3	2	2	1	3	3	4	2	3
P00966	P00966	8	8	8	Argininosuccinate synthase	ASS1	Argininosuccinate synthase	1	8	8	8	2	3	1	0	1	2	4	2	2	2	3	1	2	2	1	2	3	2	2	3	3	3	2	2	4	4	5	5	4	3	5	5	3	3	5	5	0	0
P01008	P01008	11	7	7	Antithrombin-III	SERPINC1	Antithrombin-III	1	11	7	7	3	3	3	2	3	2	2	2	3	3	3	2	3	4	3	3	3	4	4	3	2	4	4	3	9	9	8	9	9	7	8	5	7	8	7	8	4	4
P01009	P01009	3	3	3	Alpha-1-antitrypsin;Short peptide from AAT	SERPINA1	Alpha-1-antitrypsin	1	3	3	3	0	0	0	0	0	0	0	0	1	0	0	0	0	0	0	1	0	0	1	1	0	0	0	0	2	2	2	1	2	2	2	2	2	3	2	2	2	2
P01023	P01023	17	9	6	Alpha-2-macroglobulin	A2M	Alpha-2-macroglobulin	1	17	9	6	14	14	12	11	12	11	10	12	11	12	9	11	11	11	11	11	12	10	11	11	9	11	10	13	10	11	11	12	11	11	11	12	11	11	11	12	5	5
P01024	P01024	37	25	25	Complement C3;Complement C3 beta chain;C3-beta-c;Complement C3 alpha chain;C3a anaphylatoxin;Acylation stimulating protein;Complement C3b alpha chain;Complement C3c alpha chain fragment 1;Complement C3dg fragment;Complement C3g fragment;Complement C3d fragment;Complement C3f fragment;Complement C3c alpha chain fragment 2	C3	Complement C3	1	37	25	25	12	9	10	10	9	8	12	10	11	11	13	8	14	11	13	13	15	13	11	12	9	13	11	13	27	25	27	25	31	27	28	29	31	27	30	28	17	16
P01031	P01031	12	7	7	Complement C5;Complement C5 beta chain;Complement C5 alpha chain;C5a anaphylatoxin;Complement C5 alpha chain	C5	Complement C5	1	12	7	7	4	3	3	3	4	2	4	6	3	4	5	3	4	5	5	6	6	4	5	5	4	4	5	5	10	10	10	10	10	11	10	9	10	9	10	9	2	2
P01033	P01033	6	6	6	Metalloproteinase inhibitor 1	TIMP1	Metalloproteinase inhibitor 1	1	6	6	6	0	0	0	0	0	0	0	0	0	1	0	0	0	0	0	0	0	0	0	0	0	0	0	0	5	4	4	5	4	4	5	5	3	5	5	6	3	3
P01042	P01042	2	1	1	Kininogen-1;Kininogen-1 heavy chain;T-kinin;Bradykinin;Lysyl-bradykinin;Kininogen-1 light chain;Low molecular weight growth-promoting factor	KNG1	Kininogen-1	1	2	1	1	0	0	0	0	0	0	0	0	0	0	0	0	0	0	0	0	0	0	0	0	0	0	0	0	1	1	1	1	1	1	1	1	1	1	1	1	1	1
P01111	P01111	9	9	2	GTPase NRas	NRAS	GTPase NRas	1	9	9	2	8	8	9	8	9	9	8	8	8	8	8	8	5	5	5	5	6	5	5	5	5	5	4	5	5	5	6	6	6	7	7	6	5	4	4	6	1	3
P01112	P01112	8	2	1	GTPase HRas;GTPase HRas, N-terminally processed	HRAS	GTPase HRas	1	8	2	1	6	6	7	6	7	7	6	6	6	6	6	6	3	3	3	3	4	3	3	3	3	3	2	3	4	4	5	5	5	5	5	4	4	3	3	5	1	1
P01130	P01130	8	8	8	Low-density lipoprotein receptor	LDLR	Low-density lipoprotein receptor	1	8	8	8	0	0	0	0	0	0	1	0	0	1	2	1	2	1	2	3	2	2	1	0	2	3	2	3	3	6	4	5	4	2	4	3	4	5	3	3	0	2
P01266	P01266	2	2	2	Thyroglobulin	TG	Thyroglobulin	1	2	2	2	2	2	2	1	2	1	2	2	2	2	2	2	2	2	2	2	2	2	2	2	2	2	2	2	0	0	0	0	0	0	0	0	0	0	0	0	0	0
P01308;F8WCM5	P01308;F8WCM5	2;1	2;1	2;1	Insulin;Insulin B chain;Insulin A chain;Insulin, isoform 2	INS;INS-IGF2	Insulin;Insulin, isoform 2	2	2	2	2	1	1	0	0	0	0	0	0	0	0	0	0	0	0	0	0	0	0	0	0	0	0	0	0	2	2	2	2	2	2	2	2	2	2	2	2	0	0
P01344	P01344	2	2	2	Insulin-like growth factor II;Insulin-like growth factor II;Insulin-like growth factor II Ala-25 Del;Preptin	IGF2	Insulin-like growth factor II	1	2	2	2	2	2	2	2	2	2	2	2	2	2	1	2	1	1	1	2	2	1	1	1	2	0	1	1	0	0	0	0	0	0	0	0	0	0	0	0	0	0
P01591	P01591	3	3	3	Immunoglobulin J chain	IGJ	Immunoglobulin J chain	1	3	3	3	1	1	1	1	2	2	1	1	2	1	1	2	2	2	2	2	2	2	2	2	1	2	1	2	2	2	2	2	2	2	2	2	2	2	2	2	3	2
P01833	P01833	2	2	2	Polymeric immunoglobulin receptor;Secretory component	PIGR	Polymeric immunoglobulin receptor	1	2	2	2	0	0	0	0	0	0	0	0	2	0	0	0	0	0	0	0	0	0	0	0	0	0	0	0	0	0	0	0	0	0	0	0	0	0	0	0	0	0
P0DOX7;P01834	P0DOX7;P01834	1;1	1;1	1;1	Ig kappa chain C region	IGKC	Immunoglobulin kappa light chain;Immunoglobulin kappa constant	2	1	1	1	0	0	0	0	1	0	0	0	1	0	0	0	0	0	0	0	0	0	0	0	0	0	0	0	0	0	0	0	0	0	0	0	0	0	0	0	0	0
P01860	P01860	2	2	1	Ig gamma-3 chain C region	IGHG3	Immunoglobulin heavy constant gamma 3	1	2	2	1	2	0	0	0	0	0	0	0	1	0	1	0	2	1	1	0	0	1	2	1	1	1	1	1	2	2	2	2	2	2	2	2	2	2	2	2	2	2
P01861;P0DOX5;P01859;P01857	P01861;P0DOX5;P01859;P01857	2;1;1;1	1;0;0;0	1;0;0;0	Ig gamma-4 chain C region;Ig gamma-2 chain C region;Ig gamma-1 chain C region	IGHG4;IGHG2;IGHG1	Immunoglobulin heavy constant gamma 4;Immunoglobulin gamma-1 heavy chain;Immunoglobulin heavy constant gamma 2;Immunoglobulin heavy constant gamma 1	4	2	1	1	2	1	1	1	1	1	1	1	2	1	2	1	1	1	1	0	0	0	1	1	1	1	0	0	1	1	1	1	1	1	1	1	1	1	1	1	1	1
P01876	P01876	3	3	3	Ig alpha-1 chain C region	IGHA1	Immunoglobulin heavy constant alpha 1	1	3	3	3	0	0	0	1	0	0	0	0	3	1	0	1	0	0	0	0	0	0	0	0	0	0	0	0	0	0	0	0	0	0	0	0	0	0	0	0	0	0
P01889	P01889	10	3	3	HLA class I histocompatibility antigen, B-7 alpha chain	HLA-B	HLA class I histocompatibility antigen, B alpha chain	1	10	3	3	8	8	7	8	6	8	8	9	8	8	7	8	1	1	1	2	1	1	1	1	2	2	1	1	6	5	6	7	5	6	6	5	5	7	7	6	7	8
P02452;CON__Q862S4	P02452	7;1	7;1	7;1	Collagen alpha-1(I) chain	COL1A1	Collagen alpha-1(I) chain	2	7	7	7	5	3	3	5	4	3	3	3	2	2	1	1	1	1	1	0	1	2	1	0	1	3	3	1	2	3	1	2	4	0	2	4	1	3	2	2	2	1
P02462	P02462	6	6	5	Collagen alpha-1(IV) chain;Arresten	COL4A1	Collagen alpha-1(IV) chain	1	6	6	5	6	4	4	6	3	4	4	5	3	4	4	5	0	0	1	1	0	0	0	0	0	0	0	0	3	2	2	1	2	2	2	1	2	1	2	3	0	2
P02649	P02649	7	3	3	Apolipoprotein E	APOE	Apolipoprotein E	1	7	3	3	7	6	7	5	7	6	7	5	4	5	4	4	4	4	4	4	4	5	5	5	3	4	3	4	0	0	0	0	1	1	0	1	0	0	0	1	2	3
P02656	P02656	1	1	1	Apolipoprotein C-III	APOC3	Apolipoprotein C-III	1	1	1	1	1	1	1	1	1	1	1	1	1	1	1	1	1	1	1	1	1	1	1	1	1	1	1	1	0	0	0	0	0	0	0	0	0	0	0	0	0	0
P02679	P02679	3	3	3	Fibrinogen gamma chain	FGG	Fibrinogen gamma chain	1	3	3	3	2	2	2	0	2	2	3	2	1	3	1	1	3	3	3	3	3	3	3	3	3	3	3	3	1	2	0	1	1	1	1	1	1	1	1	1	1	0
P02730	P02730	1	1	1	Band 3 anion transport protein	SLC4A1	Band 3 anion transport protein	1	1	1	1	1	1	1	1	1	1	1	1	1	1	1	1	0	1	1	1	1	1	1	1	0	1	1	0	0	0	0	0	0	1	0	1	0	0	0	0	1	0
P02746	P02746	1	1	1	Complement C1q subcomponent subunit B	C1QB	Complement C1q subcomponent subunit B	1	1	1	1	0	0	0	0	0	0	0	0	0	0	0	0	0	0	0	0	0	0	0	0	0	0	0	0	1	1	1	1	1	1	1	1	1	1	1	1	1	1
P02748	P02748	3	1	1	Complement component C9;Complement component C9a;Complement component C9b	C9	Complement component C9	1	3	1	1	2	2	2	2	1	0	2	2	2	2	2	2	2	2	2	1	1	0	2	1	2	1	1	1	3	3	3	3	3	3	3	3	3	2	3	3	2	3
P02749	P02749	3	1	1	Beta-2-glycoprotein 1	APOH	Beta-2-glycoprotein 1	1	3	1	1	2	2	2	2	2	1	2	2	2	2	1	2	2	2	2	2	2	2	2	2	1	2	2	2	2	2	3	2	2	2	1	1	1	1	2	1	2	2
P02751	P02751	108	108	108	Fibronectin;Anastellin;Ugl-Y1;Ugl-Y2;Ugl-Y3	FN1	Fibronectin	1	108	108	108	92	96	94	95	82	91	94	93	90	95	96	89	57	58	69	68	70	62	56	58	54	71	63	64	95	82	82	80	83	82	80	79	80	80	77	83	39	58
P02753	P02753	2	2	2	Retinol-binding protein 4;Plasma retinol-binding protein(1-182);Plasma retinol-binding protein(1-181);Plasma retinol-binding protein(1-179);Plasma retinol-binding protein(1-176)	RBP4	Retinol-binding protein 4	1	2	2	2	1	1	0	1	1	1	1	0	0	0	0	0	0	0	0	0	0	0	0	1	0	0	0	0	1	0	0	0	0	0	1	0	1	0	1	1	0	0
P02766	P02766	1	1	1	Transthyretin	TTR	Transthyretin	1	1	1	1	0	0	0	0	0	0	0	0	0	0	0	0	0	0	0	0	0	0	0	0	0	0	0	0	1	0	1	1	1	1	1	1	1	1	1	1	0	0
P02786;Q9UP52	P02786	33;1	33;1	33;1	Transferrin receptor protein 1;Transferrin receptor protein 1, serum form	TFRC	Transferrin receptor protein 1	2	33	33	33	14	14	16	9	13	15	12	19	13	11	14	16	27	27	28	31	31	28	30	28	29	28	28	27	15	12	17	14	16	13	15	16	13	15	14	14	7	7
P02787	P02787	2	1	1	Serotransferrin	TF	Serotransferrin	1	2	1	1	1	1	1	0	1	0	0	1	0	0	0	0	1	1	1	1	1	1	1	1	0	1	1	1	0	1	1	1	0	0	1	1	1	2	0	0	1	1
P02788	P02788	10	8	8	Lactotransferrin;Lactoferricin-H;Kaliocin-1;Lactoferroxin-A;Lactoferroxin-B;Lactoferroxin-C	LTF	Lactotransferrin	1	10	8	8	2	2	2	2	3	2	2	2	10	3	2	4	1	2	2	2	2	2	2	2	0	1	2	0	1	1	2	2	1	1	2	1	2	2	1	2	0	0
P02794	P02794	9	9	9	Ferritin heavy chain;Ferritin heavy chain, N-terminally processed	FTH1	Ferritin heavy chain	1	9	9	9	2	4	4	3	2	4	3	4	4	3	4	2	2	2	2	2	2	2	2	3	2	2	2	2	3	6	9	4	6	7	5	4	5	6	4	7	1	1
P02795;P80297;P13640;CON__P67983;Q8N339;P80294;P04731	P02795;P80297;P13640;CON__P67983;Q8N339	4;3;3;2;2;1;1	4;3;3;2;2;1;1	2;1;1;0;0;1;1	Metallothionein-2;Metallothionein-1X;Metallothionein-1G;Metallothionein-1M	MT2A;MT1X;MT1G;MT1M	Metallothionein-2;Metallothionein-1X;Metallothionein-1G;;Metallothionein-1M	7	4	4	2	2	2	1	1	1	1	2	2	2	2	2	1	1	1	1	2	1	1	1	1	1	1	1	1	3	4	4	4	4	4	4	4	4	4	4	4	4	4
P02808	P02808	2	2	2	Statherin	STATH	Statherin	1	2	2	2	0	0	0	1	1	0	0	0	1	0	0	1	0	0	0	0	0	0	0	0	0	0	0	0	0	0	0	0	0	0	0	0	0	0	0	0	0	0
P03973	P03973	3	3	3	Antileukoproteinase	SLPI	Antileukoproteinase	1	3	3	3	0	0	0	0	1	0	0	0	0	0	0	1	0	0	0	0	0	0	0	0	0	0	0	0	3	3	3	3	3	2	3	3	3	3	3	3	2	2
P04004	P04004	6	3	3	Vitronectin;Vitronectin V65 subunit;Vitronectin V10 subunit;Somatomedin-B	VTN	Vitronectin	1	6	3	3	2	2	3	2	3	3	3	3	3	3	2	3	3	3	2	3	3	2	3	3	2	2	2	2	3	3	3	3	3	4	4	4	3	4	4	4	3	4
P04040	P04040	16	16	16	Catalase	CAT	Catalase	1	16	16	16	4	6	6	3	3	3	5	5	5	3	4	6	7	5	4	7	7	5	5	2	4	5	4	6	1	1	0	2	1	0	2	3	0	3	1	3	14	13
P04062	P04062	5	5	5	Glucosylceramidase	GBA	Lysosomal acid glucosylceramidase	1	5	5	5	1	0	0	0	0	0	0	0	0	0	0	0	3	2	2	4	2	4	3	3	2	2	2	1	0	0	1	1	0	0	0	0	0	0	1	0	2	2
P04066	P04066	5	5	5	Tissue alpha-L-fucosidase	FUCA1	Tissue alpha-L-fucosidase	1	5	5	5	0	0	0	0	1	0	0	0	0	0	1	0	0	0	2	0	2	1	3	2	1	3	3	1	0	0	0	0	0	0	0	0	0	0	0	0	0	0
P04070	P04070	3	3	3	Vitamin K-dependent protein C;Vitamin K-dependent protein C light chain;Vitamin K-dependent protein C heavy chain;Activation peptide	PROC	Vitamin K-dependent protein C	1	3	3	3	1	0	1	0	1	1	1	1	1	1	0	0	0	0	0	0	0	0	0	0	0	0	0	0	3	3	3	3	3	3	3	3	3	1	3	3	1	1
P04075	P04075	24	24	20	Fructose-bisphosphate aldolase A	ALDOA	Fructose-bisphosphate aldolase A	1	24	24	20	22	22	20	23	21	21	21	21	23	21	22	23	16	17	14	17	20	15	14	13	16	17	14	13	16	17	14	14	14	15	12	16	12	17	15	16	10	9
P04080	P04080	1	1	1	Cystatin-B	CSTB	Cystatin-B	1	1	1	1	1	1	1	1	1	1	1	1	1	1	1	1	0	0	0	0	0	0	0	0	0	0	0	1	0	1	1	0	1	0	0	0	0	1	0	0	1	1
P04083	P04083	30	30	30	Annexin A1	ANXA1	Annexin A1	1	30	30	30	15	13	15	13	13	14	17	16	13	16	16	13	3	1	2	2	3	2	0	1	2	3	2	4	24	23	23	25	24	24	24	24	24	24	25	25	21	21
P04114	P04114	22	19	19	Apolipoprotein B-100;Apolipoprotein B-48	APOB	Apolipoprotein B-100	1	22	19	19	6	5	5	4	6	5	8	8	5	5	6	5	7	7	7	7	7	8	8	8	5	7	7	6	14	11	15	14	12	13	12	15	13	12	14	12	12	13
P04155	P04155	3	3	3	Trefoil factor 1	TFF1	Trefoil factor 1	1	3	3	3	0	0	0	0	0	0	0	0	0	0	0	0	1	2	2	2	2	3	2	2	2	2	2	2	0	0	0	0	0	0	0	0	0	0	0	0	0	0
P04156	P04156	3	3	3	Major prion protein	PRNP	Major prion protein	1	3	3	3	3	2	3	3	3	3	3	3	3	3	3	3	0	0	0	0	1	0	0	0	0	0	0	0	3	3	3	3	3	3	3	3	3	2	3	2	1	1
P04179	P04179	3	3	3	Superoxide dismutase [Mn], mitochondrial	SOD2	Superoxide dismutase [Mn], mitochondrial	1	3	3	3	0	1	0	2	0	0	1	0	0	0	1	0	1	1	1	1	1	1	0	0	0	1	0	0	0	0	0	0	0	0	0	1	0	0	0	0	2	2
P04181	P04181	7	7	7	Ornithine aminotransferase, mitochondrial;Ornithine aminotransferase, hepatic form;Ornithine aminotransferase, renal form	OAT	Ornithine aminotransferase, mitochondrial	1	7	7	7	0	0	0	0	0	0	0	0	0	0	0	0	0	0	0	0	0	0	0	0	0	0	0	0	0	0	0	1	0	1	0	0	1	0	1	0	7	6
P04259	P04259	45	1	1	Keratin, type II cytoskeletal 6B	KRT6B	Keratin, type II cytoskeletal 6B	1	45	1	1	32	26	16	32	30	24	27	41	29	27	28	25	34	22	17	17	24	17	19	17	15	24	19	37	32	36	34	36	34	35	35	34	38	39	39	34	38	35
P04264;CON__P04264	P04264;CON__P04264	54;52	50;48	39;37	Keratin, type II cytoskeletal 1	KRT1	Keratin, type II cytoskeletal 1;	2	54	50	39	49	46	41	50	42	43	42	45	48	49	41	49	45	43	36	40	45	36	41	41	37	40	42	43	40	34	30	24	33	41	35	37	38	34	45	30	36	20
P04350	P04350	21	3	2	Tubulin beta-4A chain	TUBB4A	Tubulin beta-4A chain	1	21	3	2	16	18	19	14	17	14	18	19	18	17	18	19	19	17	19	19	18	17	18	18	17	19	17	14	18	18	17	18	17	17	17	17	18	18	17	19	8	10
P04406;O14556	P04406	19;1	19;1	19;1	Glyceraldehyde-3-phosphate dehydrogenase	GAPDH	Glyceraldehyde-3-phosphate dehydrogenase	2	19	19	19	14	14	14	12	14	14	16	16	14	14	14	14	14	10	11	15	14	12	13	15	14	12	13	12	17	18	18	17	17	18	18	19	19	16	18	18	10	12
P04439	P04439	14	14	7	HLA class I histocompatibility antigen, A-3 alpha chain	HLA-A	HLA class I histocompatibility antigen, A alpha chain	1	14	14	7	8	8	6	8	6	7	8	9	6	9	6	8	4	2	3	5	4	4	4	4	6	3	4	4	10	11	10	11	9	11	9	9	9	10	11	10	7	10
P04626	P04626	5	5	5	Receptor tyrosine-protein kinase erbB-2	ERBB2	Receptor tyrosine-protein kinase erbB-2	1	5	5	5	0	0	0	0	0	0	2	2	0	1	2	1	2	2	2	2	1	2	0	0	1	2	1	0	0	0	0	0	0	0	0	0	0	0	0	0	0	0
P04632;Q96L46	P04632	6;1	6;1	6;1	Calpain small subunit 1	CAPNS1	Calpain small subunit 1	2	6	6	6	3	4	4	4	4	4	5	5	5	5	4	4	3	4	3	3	4	3	3	2	2	3	3	3	4	3	4	3	3	5	3	4	3	5	5	3	3	3
P04732	P04732	3	1	1	Metallothionein-1E	MT1E	Metallothionein-1E	1	3	1	1	1	1	1	1	1	1	1	1	1	1	1	1	1	1	1	2	1	1	1	1	1	1	1	1	2	2	2	2	2	2	2	2	2	2	2	2	2	2
P04792	P04792	12	12	12	Heat shock protein beta-1	HSPB1	Heat shock protein beta-1	1	12	12	12	4	4	4	5	4	4	4	4	3	4	4	3	8	9	9	9	9	8	9	9	9	9	7	9	6	3	6	6	6	5	7	3	5	4	5	4	7	7
P04843	P04843	26	26	26	Dolichyl-diphosphooligosaccharide--protein glycosyltransferase subunit 1	RPN1	Dolichyl-diphosphooligosaccharide--protein glycosyltransferase subunit 1	1	26	26	26	15	18	14	11	12	15	21	18	16	15	12	15	18	16	17	22	22	17	17	19	21	21	21	18	22	19	20	17	18	18	18	19	15	20	18	17	19	21
P04844	P04844	21	21	21	Dolichyl-diphosphooligosaccharide--protein glycosyltransferase subunit 2	RPN2	Dolichyl-diphosphooligosaccharide--protein glycosyltransferase subunit 2	1	21	21	21	8	11	8	12	5	8	11	10	9	10	10	10	12	10	11	15	14	11	12	10	13	14	11	11	17	16	14	13	15	12	13	17	12	17	14	15	10	12
P04899	P04899	21	21	13	Guanine nucleotide-binding protein G(i) subunit alpha-2	GNAI2	Guanine nucleotide-binding protein G(i) subunit alpha-2	1	21	21	13	20	18	18	19	17	17	17	17	19	16	17	19	11	9	9	11	12	11	12	11	12	12	11	10	15	19	15	16	15	18	16	16	16	20	15	18	10	10
P05023;Q13733	P05023	49;8	49;8	31;0	Sodium/potassium-transporting ATPase subunit alpha-1	ATP1A1	Sodium/potassium-transporting ATPase subunit alpha-1	2	49	49	31	42	43	44	40	43	43	44	40	44	42	42	43	34	33	34	35	39	34	34	37	37	39	37	34	38	34	33	37	37	34	34	35	34	37	34	34	32	30
P05026	P05026	12	12	12	Sodium/potassium-transporting ATPase subunit beta-1	ATP1B1	Sodium/potassium-transporting ATPase subunit beta-1	1	12	12	12	7	8	9	7	8	8	8	8	8	8	8	8	8	7	9	9	9	9	7	9	7	7	9	7	8	5	7	8	7	8	5	6	6	7	6	8	6	8
P05067	P05067	6	5	5	Amyloid beta A4 protein;N-APP;Soluble APP-alpha;Soluble APP-beta;C99;Beta-amyloid protein 42;Beta-amyloid protein 40;C83;P3(42);P3(40);C80;Gamma-secretase C-terminal fragment 59;Gamma-secretase C-terminal fragment 57;Gamma-secretase C-terminal fragment 50;C31	APP	Amyloid-beta precursor protein	1	6	5	5	3	2	3	5	5	4	4	3	4	4	3	2	4	1	3	3	4	2	2	2	1	2	2	2	3	1	3	3	4	4	4	4	3	4	4	3	3	3
P05089	P05089	4	4	4	Arginase-1	ARG1	Arginase-1	1	4	4	4	2	0	1	4	1	1	0	1	3	2	1	3	0	0	0	0	0	0	0	0	1	0	0	0	0	0	0	0	0	0	0	0	0	1	0	0	0	0
P05090	P05090	4	4	4	Apolipoprotein D	APOD	Apolipoprotein D	1	4	4	4	0	4	0	0	0	1	0	0	0	3	1	2	0	0	0	0	0	0	0	0	0	0	0	0	0	0	0	0	1	0	0	2	1	1	1	0	0	0
P05091	P05091	2	2	2	Aldehyde dehydrogenase, mitochondrial	ALDH2	Aldehyde dehydrogenase, mitochondrial	1	2	2	2	1	1	1	1	0	0	1	1	1	1	1	1	0	0	0	0	0	0	0	0	0	0	0	0	0	0	0	0	0	0	0	0	0	0	0	0	0	0
P05106	P05106	22	22	22	Integrin beta-3	ITGB3	Integrin beta-3	1	22	22	22	21	21	21	22	21	21	22	21	21	20	21	22	14	16	14	15	16	15	13	14	14	16	15	13	1	1	3	3	0	2	5	3	3	1	3	3	1	2
P05109	P05109	2	2	2	Protein S100-A8;Protein S100-A8, N-terminally processed	S100A8	Protein S100-A8	1	2	2	2	2	1	1	1	1	0	0	0	0	1	0	0	0	0	0	0	0	0	0	0	0	0	0	0	1	1	1	0	1	0	0	0	0	0	2	0	1	1
P05121	P05121	1	1	1	Plasminogen activator inhibitor 1	SERPINE1	Plasminogen activator inhibitor 1	1	1	1	1	0	0	0	0	0	0	0	0	0	0	0	0	0	0	0	0	0	0	0	0	0	0	0	0	0	0	0	0	0	0	1	0	0	0	0	0	0	0
P05141;Q9H0C2	P05141	13;3	13;3	5;0	ADP/ATP translocase 2;ADP/ATP translocase 2, N-terminally processed	SLC25A5	ADP/ATP translocase 2	2	13	13	5	4	6	3	4	3	4	6	5	5	5	5	4	5	5	4	7	9	5	5	5	5	6	4	2	2	1	1	1	1	2	1	1	1	2	0	1	10	7
P05160	P05160	3	2	2	Coagulation factor XIII B chain	F13B	Coagulation factor XIII B chain	1	3	2	2	1	1	1	1	1	1	1	1	1	1	1	1	0	1	0	0	1	1	1	1	0	1	1	0	1	0	0	0	1	2	1	1	0	1	1	0	1	2
P05166	P05166	4	4	4	Propionyl-CoA carboxylase beta chain, mitochondrial	PCCB	Propionyl-CoA carboxylase beta chain, mitochondrial	1	4	4	4	0	0	0	0	0	0	0	0	0	0	0	0	0	0	0	0	0	0	0	0	0	0	0	0	0	0	0	0	0	0	0	0	0	0	0	0	4	2
P05186	P05186	2	2	2	Alkaline phosphatase, tissue-nonspecific isozyme	ALPL	Alkaline phosphatase, tissue-nonspecific isozyme	1	2	2	2	2	2	2	2	2	2	2	2	2	2	2	2	1	0	0	0	0	0	1	0	0	0	1	0	0	1	0	0	0	0	0	0	0	1	0	0	0	0
P05198	P05198	1	1	1	Eukaryotic translation initiation factor 2 subunit 1	EIF2S1	Eukaryotic translation initiation factor 2 subunit 1	1	1	1	1	1	1	1	0	1	1	1	1	1	0	1	1	1	0	0	1	1	1	1	0	1	1	1	0	1	1	1	1	1	1	0	1	1	0	1	1	0	1
P05362	P05362	1	1	1	Intercellular adhesion molecule 1	ICAM1	Intercellular adhesion molecule 1	1	1	1	1	1	0	0	0	0	0	0	1	0	0	1	0	1	0	0	1	1	0	0	0	1	0	0	0	0	1	1	0	0	0	1	0	0	0	1	1	0	0
P05386	P05386	3	3	3	60S acidic ribosomal protein P1	RPLP1	60S acidic ribosomal protein P1	1	3	3	3	3	3	3	1	2	2	2	2	3	2	3	1	1	1	1	1	1	1	1	1	1	1	1	1	2	2	2	2	1	2	1	2	1	1	2	1	1	1
P05387	P05387	5	5	5	60S acidic ribosomal protein P2	RPLP2	60S acidic ribosomal protein P2	1	5	5	5	4	4	3	3	3	3	4	4	3	4	5	4	2	2	2	4	3	2	3	2	2	3	2	2	3	4	4	3	3	2	3	5	3	4	3	3	1	1
P05388;Q8NHW5	P05388;Q8NHW5	9;7	9;7	9;7	60S acidic ribosomal protein P0;60S acidic ribosomal protein P0-like	RPLP0;RPLP0P6	60S acidic ribosomal protein P0;60S acidic ribosomal protein P0-like	2	9	9	9	5	5	5	3	5	5	9	8	8	7	7	5	5	4	5	5	6	4	6	5	5	6	4	5	7	7	6	7	6	6	6	6	5	6	7	7	3	3
P05455	P05455	4	4	4	Lupus La protein	SSB	Lupus La protein	1	4	4	4	3	2	2	0	1	3	2	3	2	3	3	2	1	1	1	1	2	2	1	2	3	2	2	1	1	1	0	1	0	1	0	0	1	0	0	0	0	0
P05546	P05546	6	5	5	Heparin cofactor 2	SERPIND1	Heparin cofactor 2	1	6	5	5	1	0	0	0	0	0	0	0	0	0	0	0	0	0	0	0	0	0	0	0	0	0	0	0	6	6	6	6	6	6	6	6	6	5	6	6	4	3
P05556	P05556	35	35	35	Integrin beta-1	ITGB1	Integrin beta-1	1	35	35	35	24	24	28	22	24	25	25	30	29	26	27	26	21	19	20	22	20	21	21	20	18	21	21	19	26	29	27	28	27	28	27	26	26	29	30	28	21	20
P05771;P05129	P05771	10;1	10;1	6;0	Protein kinase C beta type	PRKCB	Protein kinase C beta type	2	10	10	6	7	8	9	6	6	8	9	8	9	7	9	7	2	1	1	0	0	1	2	0	0	1	2	2	0	1	0	0	0	0	0	0	0	0	0	0	0	0
P05783;CON__H-INV:HIT000015463;CON__Q92764;CON__Q497I4;Q92764	P05783	21;2;2;2;2	19;2;1;1;1	13;2;1;1;1	Keratin, type I cytoskeletal 18	KRT18	Keratin, type I cytoskeletal 18	5	21	19	13	1	2	1	2	2	1	2	1	2	2	1	1	16	18	17	17	18	16	14	17	15	17	15	16	11	13	12	13	11	11	14	9	10	16	14	13	13	15
P05976;P08590	P05976	3;1	3;1	3;1	Myosin light chain 1/3, skeletal muscle isoform	MYL1	Myosin light chain 1/3, skeletal muscle isoform	2	3	3	3	1	1	1	0	3	0	1	1	1	1	1	0	0	0	0	1	1	1	0	0	0	1	1	0	1	1	1	1	1	1	1	1	1	1	1	1	0	0
P06132	P06132	3	3	3	Uroporphyrinogen decarboxylase	UROD	Uroporphyrinogen decarboxylase	1	3	3	3	2	2	1	1	1	2	2	2	2	2	2	2	1	0	1	1	1	2	1	0	1	1	1	1	1	1	0	2	0	2	0	1	1	0	1	0	0	0
P06213	P06213	4	4	4	Insulin receptor;Insulin receptor subunit alpha;Insulin receptor subunit beta	INSR	Insulin receptor	1	4	4	4	0	1	1	1	0	1	2	2	1	2	2	2	1	0	1	1	1	0	1	0	1	1	1	0	0	0	0	0	0	0	0	0	0	0	0	0	0	0
P06241	P06241	16	10	10	Tyrosine-protein kinase Fyn	FYN	Tyrosine-protein kinase Fyn	1	16	10	10	8	12	11	6	7	9	14	14	12	12	13	14	3	1	2	3	3	2	3	2	1	1	2	2	2	3	3	2	3	2	2	2	3	3	3	1	2	2
P06280	P06280	4	4	4	Alpha-galactosidase A	GLA	Alpha-galactosidase A	1	4	4	4	0	0	0	0	0	0	1	0	0	1	1	0	0	0	0	0	0	0	0	0	0	0	0	0	0	0	0	1	1	1	1	0	0	0	1	1	1	1
P06396	P06396	17	2	2	Gelsolin	GSN	Gelsolin	1	17	2	2	10	9	7	8	7	6	7	9	6	8	8	5	9	8	8	9	7	8	9	9	9	8	9	9	11	11	13	12	12	13	10	13	14	12	12	10	9	8
P06454	P06454	3	3	3	Prothymosin alpha;Prothymosin alpha, N-terminally processed;Thymosin alpha-1	PTMA	Prothymosin alpha	1	3	3	3	3	3	3	3	3	3	3	3	3	3	3	3	0	1	0	2	1	2	0	0	0	1	1	0	0	0	0	0	0	0	0	0	0	0	0	0	0	1
P06493;P11802;Q00534;P50750;Q96Q40;O94921;Q07002;Q00536;Q9NYV4;Q14004	P06493	5;1;1;1;1;1;1;1;1;1	5;1;1;1;1;1;1;1;1;1	3;0;0;0;0;0;0;0;0;0	Cyclin-dependent kinase 1	CDK1	Cyclin-dependent kinase 1	10	5	5	3	5	5	4	4	3	4	5	5	5	4	5	4	2	2	1	3	2	2	3	2	3	2	3	2	2	2	2	2	3	4	2	2	2	2	2	2	2	1
P06576	P06576	19	19	19	ATP synthase subunit beta, mitochondrial	ATP5B	ATP synthase subunit beta, mitochondrial	1	19	19	19	0	2	0	0	1	1	2	1	1	1	3	2	2	0	1	4	6	3	1	2	4	5	3	1	8	4	6	6	2	6	6	4	6	5	5	5	17	17
P06681	P06681	1	1	1	Complement C2;Complement C2b fragment;Complement C2a fragment	C2	Complement C2	1	1	1	1	0	0	0	0	0	0	0	0	0	0	0	0	0	0	0	0	0	0	0	0	0	0	0	0	1	1	1	1	1	1	1	1	1	1	1	1	0	0
P06702	P06702	4	4	4	Protein S100-A9	S100A9	Protein S100-A9	1	4	4	4	4	2	1	3	3	1	1	1	2	2	2	0	1	0	1	1	0	0	0	0	0	1	2	0	2	2	2	0	2	2	1	2	1	3	4	2	0	0
P06703	P06703	5	5	5	Protein S100-A6	S100A6	Protein S100-A6	1	5	5	5	3	1	0	1	1	0	0	0	0	0	0	0	1	0	0	2	0	0	0	0	1	1	1	0	4	4	4	5	5	5	5	5	4	5	5	5	3	3
P06730;A6NMX2	P06730;A6NMX2	2;1	2;1	2;1	Eukaryotic translation initiation factor 4E;Eukaryotic translation initiation factor 4E type 1B	EIF4E;EIF4E1B	Eukaryotic translation initiation factor 4E;Eukaryotic translation initiation factor 4E type 1B	2	2	2	2	1	0	0	0	1	1	1	1	0	1	2	2	0	1	1	1	1	1	0	1	1	1	0	1	1	2	2	0	0	2	2	0	2	1	2	2	1	1
P06733;P09104	P06733	33;3	33;3	30;0	Alpha-enolase	ENO1	Alpha-enolase	2	33	33	30	24	23	23	24	23	24	24	21	20	23	24	23	17	16	15	20	21	16	16	18	16	21	17	15	20	25	22	24	21	26	22	22	20	22	22	24	21	24
P06737	P06737	26	20	19	Glycogen phosphorylase, liver form	PYGL	Glycogen phosphorylase, liver form	1	26	20	19	17	13	15	8	13	13	19	15	13	13	15	16	9	7	9	10	11	9	9	10	9	11	8	7	15	14	15	16	15	14	12	12	10	9	12	13	5	5
P06744	P06744	16	16	11	Glucose-6-phosphate isomerase	GPI	Glucose-6-phosphate isomerase	1	16	16	11	11	10	13	12	12	11	12	14	13	13	13	13	3	2	2	4	4	2	2	3	3	5	4	4	9	12	11	9	12	12	11	11	10	13	11	10	9	5
P06748	P06748	5	5	5	Nucleophosmin	NPM1	Nucleophosmin	1	5	5	5	5	5	4	4	4	4	4	3	4	3	3	3	4	4	4	4	5	4	3	3	4	4	5	4	2	2	3	2	2	2	3	3	2	2	3	3	2	4
P06753	P06753	4	1	1	Tropomyosin alpha-3 chain	TPM3	Tropomyosin alpha-3 chain	1	4	1	1	1	1	2	1	1	1	1	1	1	2	2	1	1	0	0	1	1	1	2	0	0	1	1	1	0	1	0	1	0	0	0	0	0	0	1	0	4	4
P06756	P06756	35	35	35	Integrin alpha-V;Integrin alpha-V heavy chain;Integrin alpha-V light chain	ITGAV	Integrin alpha-V	1	35	35	35	28	30	31	23	29	32	30	29	29	29	29	25	17	16	17	19	21	18	17	19	11	20	17	16	16	22	18	19	21	18	20	17	20	21	19	19	17	13
P06865	P06865	11	11	11	Beta-hexosaminidase subunit alpha	HEXA	Beta-hexosaminidase subunit alpha	1	11	11	11	2	1	2	1	1	2	1	2	1	1	2	1	1	2	1	2	3	3	1	1	1	2	2	2	0	1	0	0	1	2	0	2	0	2	0	0	3	2
Q16778;P33778;P23527;P06899;Q6DRA6;Q6DN03	Q16778;P33778;P23527;P06899	12;12;12;12;5;5	2;2;2;2;2;2	0;0;0;0;0;0	Histone H2B type 2-E;Histone H2B type 1-B;Histone H2B type 1-O;Histone H2B type 1-J	HIST2H2BE;HIST1H2BB;HIST1H2BO;HIST1H2BJ	Histone H2B type 2-E;Histone H2B type 1-B;Histone H2B type 1-O;Histone H2B type 1-J	6	12	2	0	11	11	11	11	10	10	10	11	10	9	10	10	10	10	11	11	9	11	10	11	12	9	12	11	8	8	9	10	9	8	10	10	10	10	10	11	4	6
P07099	P07099	13	13	13	Epoxide hydrolase 1	EPHX1	Epoxide hydrolase 1	1	13	13	13	6	8	6	4	3	6	8	6	5	4	8	5	2	2	1	2	1	3	2	1	2	2	2	1	9	8	10	9	11	10	8	12	8	10	10	10	6	5
P07108	P07108	3	3	3	Acyl-CoA-binding protein	DBI	Acyl-CoA-binding protein	1	3	3	3	1	2	3	2	3	3	2	3	3	3	2	3	1	0	0	0	0	0	0	0	0	0	0	0	1	0	1	1	2	1	0	1	1	1	1	1	0	1
P07195;Q6ZMR3;P07864;Q9BYZ2	P07195	21;1;1;1	19;0;0;0	19;0;0;0	L-lactate dehydrogenase B chain	LDHB	L-lactate dehydrogenase B chain	4	21	19	19	16	18	16	17	17	16	17	16	17	15	18	17	10	10	12	11	12	12	12	12	9	11	12	9	13	15	14	15	10	12	14	14	13	11	14	14	13	11
P07203	P07203	3	3	3	Glutathione peroxidase 1	GPX1	Glutathione peroxidase 1	1	3	3	3	0	1	0	1	0	0	0	1	0	1	1	0	0	0	0	0	0	0	0	0	0	0	1	0	0	0	0	0	0	0	0	0	0	0	0	0	0	0
P07237	P07237	34	34	34	Protein disulfide-isomerase	P4HB	Protein disulfide-isomerase	1	34	34	34	18	21	18	20	15	17	19	21	18	18	19	19	24	24	22	24	24	24	23	23	21	25	20	21	26	26	24	23	24	21	19	24	21	27	24	24	27	25
P07311	P07311	2	2	2	Acylphosphatase-1	ACYP1	Acylphosphatase-1	1	2	2	2	1	1	1	2	1	1	2	2	2	2	1	2	0	0	0	0	0	0	0	0	0	0	0	0	0	0	0	0	0	0	0	0	0	0	0	0	0	0
P07339	P07339	11	11	11	Cathepsin D;Cathepsin D light chain;Cathepsin D heavy chain	CTSD	Cathepsin D	1	11	11	11	2	1	2	4	1	1	4	3	3	1	3	6	8	6	6	9	9	6	8	7	7	9	6	6	7	6	5	7	8	5	5	7	3	8	5	7	9	9
P07355;A6NMY6	P07355;A6NMY6	32;21	32;21	32;21	Annexin A2;Putative annexin A2-like protein	ANXA2;ANXA2P2	Annexin A2;Putative annexin A2-like protein	2	32	32	32	22	23	26	24	20	22	25	25	25	25	23	23	16	20	20	22	22	20	21	22	21	22	21	20	27	29	26	25	28	30	28	27	27	28	28	29	24	24
P07357	P07357	3	3	3	Complement component C8 alpha chain	C8A	Complement component C8 alpha chain	1	3	3	3	0	0	0	0	0	0	0	0	0	0	0	0	0	0	0	0	0	0	0	0	0	0	0	0	3	3	3	3	2	3	3	3	3	3	3	3	1	1
P07358	P07358	8	8	8	Complement component C8 beta chain	C8B	Complement component C8 beta chain	1	8	8	8	0	1	1	0	2	1	2	1	1	2	1	2	1	1	2	2	2	3	2	1	1	2	2	1	8	7	8	8	8	8	8	8	8	7	8	8	2	1
P07360	P07360	1	1	1	Complement component C8 gamma chain	C8G	Complement component C8 gamma chain	1	1	1	1	0	0	0	0	0	0	0	0	0	0	0	0	0	0	0	0	0	0	0	0	0	0	0	0	1	1	1	1	1	1	1	1	1	1	1	1	0	0
P07384	P07384	9	9	9	Calpain-1 catalytic subunit	CAPN1	Calpain-1 catalytic subunit	1	9	9	9	1	0	2	2	0	0	3	3	1	2	2	1	4	3	2	4	3	4	4	2	4	3	4	3	3	1	1	2	2	1	4	3	2	2	4	1	3	3
P07437;A6NNZ2	P07437	23;8	5;0	5;0	Tubulin beta chain	TUBB	Tubulin beta chain	2	23	5	5	21	20	22	18	19	18	19	22	20	21	21	20	23	21	21	23	21	21	21	22	20	22	21	20	21	22	21	21	20	21	21	21	20	21	20	21	11	12
P07602	P07602	9	9	9	Prosaposin;Saposin-A;Saposin-B-Val;Saposin-B;Saposin-C;Saposin-D	PSAP	Prosaposin	1	9	9	9	5	4	4	3	2	2	3	4	3	3	3	4	4	4	3	4	5	4	3	3	3	3	4	5	6	3	4	4	4	5	5	4	5	5	5	5	5	5
P07686	P07686	12	12	12	Beta-hexosaminidase subunit beta;Beta-hexosaminidase subunit beta chain B;Beta-hexosaminidase subunit beta chain A	HEXB	Beta-hexosaminidase subunit beta	1	12	12	12	1	3	2	1	2	2	4	2	4	3	3	2	2	2	3	4	4	3	1	2	5	3	3	3	5	6	5	5	3	5	5	5	3	4	5	7	7	6
P07737	P07737	11	11	7	Profilin-1	PFN1	Profilin-1	1	11	11	7	10	9	8	8	8	8	9	9	9	8	10	9	9	7	6	10	8	8	8	9	8	10	8	8	8	9	9	8	9	9	8	8	8	9	8	8	8	8
P07741	P07741	11	11	11	Adenine phosphoribosyltransferase	APRT	Adenine phosphoribosyltransferase	1	11	11	11	7	8	8	7	6	6	8	7	8	7	7	6	8	6	7	7	7	7	5	7	9	7	7	6	7	8	8	7	5	8	6	8	6	5	9	7	4	2
P07814	P07814	38	38	38	Bifunctional glutamate/proline--tRNA ligase;Glutamate--tRNA ligase;Proline--tRNA ligase	EPRS	Bifunctional glutamate/proline--tRNA ligase	1	38	38	38	14	25	20	7	7	15	20	19	17	19	19	13	11	11	13	13	11	10	15	11	12	18	14	12	27	23	24	26	23	26	28	28	29	18	28	28	8	5
P07900;Q14568;Q58FG0	P07900	41;8;4	41;8;4	26;2;2	Heat shock protein HSP 90-alpha	HSP90AA1	Heat shock protein HSP 90-alpha	3	41	41	26	31	32	35	29	30	31	35	36	35	34	33	30	23	19	18	21	21	16	17	19	22	24	23	15	24	26	28	25	26	22	21	23	29	21	27	23	17	17
P07910;P0DMR1;O60812;B7ZW38;B2RXH8	P07910;P0DMR1;O60812;B7ZW38;B2RXH8	2;1;1;1;1	2;1;1;1;1	2;1;1;1;1	Heterogeneous nuclear ribonucleoproteins C1/C2;Heterogeneous nuclear ribonucleoprotein C-like 4;Heterogeneous nuclear ribonucleoprotein C-like 1;Heterogeneous nuclear ribonucleoprotein C-like 3;Heterogeneous nuclear ribonucleoprotein C-like 2	HNRNPC;HNRNPCL4;HNRNPCL1;HNRNPCL3;HNRNPCL2	Heterogeneous nuclear ribonucleoproteins C1/C2;Heterogeneous nuclear ribonucleoprotein C-like 4;Heterogeneous nuclear ribonucleoprotein C-like 1;Heterogeneous nuclear ribonucleoprotein C-like 3;Heterogeneous nuclear ribonucleoprotein C-like 2	5	2	2	2	1	1	1	1	1	1	2	1	2	1	1	1	1	1	1	1	1	1	1	1	1	1	1	1	2	2	2	1	2	2	2	2	2	2	2	2	0	1
P07919;A0A096LP55	P07919;A0A096LP55	2;1	2;1	2;1	Cytochrome b-c1 complex subunit 6, mitochondrial;Cytochrome b-c1 complex subunit 6	UQCRH;UQCRHL	Cytochrome b-c1 complex subunit 6, mitochondrial;Cytochrome b-c1 complex subunit 6-like, mitochondrial	2	2	2	2	0	0	0	0	0	0	0	0	0	0	0	0	0	0	0	0	0	0	0	0	0	0	0	0	0	0	0	0	0	0	0	0	0	0	0	0	2	2
P07942	P07942	70	70	70	Laminin subunit beta-1	LAMB1	Laminin subunit beta-1	1	70	70	70	21	45	39	17	17	16	26	27	16	17	12	15	56	55	52	56	55	55	47	54	69	60	59	57	35	26	21	24	28	25	23	30	24	29	30	21	5	9
P07947;P09769	P07947	16;1	16;1	8;0	Tyrosine-protein kinase Yes	YES1	Tyrosine-protein kinase Yes	2	16	16	8	13	14	13	7	11	14	16	16	15	15	15	14	9	6	8	10	9	7	10	7	5	8	9	7	7	9	7	5	11	7	6	6	7	8	7	8	4	5
P07948;P08631	P07948	16;3	14;1	14;1	Tyrosine-protein kinase Lyn	LYN	Tyrosine-protein kinase Lyn	2	16	14	14	8	13	13	6	12	10	13	14	13	12	11	15	3	3	4	3	4	3	4	3	2	3	3	4	5	6	6	6	7	6	5	6	4	7	6	7	5	6
P07951	P07951	7	2	0	Tropomyosin beta chain	TPM2	Tropomyosin beta chain	1	7	2	0	1	2	2	1	4	2	2	2	1	2	3	2	1	0	0	1	2	1	2	1	0	1	2	1	0	1	0	1	0	0	0	0	0	0	1	0	4	5
P07954	P07954	11	11	11	Fumarate hydratase, mitochondrial	FH	Fumarate hydratase, mitochondrial	1	11	11	11	0	1	0	0	0	0	1	1	1	0	1	1	0	1	1	1	0	1	2	1	1	1	1	1	2	1	1	2	2	2	1	2	3	2	1	0	8	8
P07996;P35442	P07996	41;2	12;1	12;1	Thrombospondin-1	THBS1	Thrombospondin-1	2	41	12	12	9	10	8	7	6	8	11	5	7	7	7	5	31	34	28	34	32	27	30	32	27	33	34	26	24	16	19	19	20	17	17	18	26	19	18	21	3	5
P08069	P08069	9	9	9	Insulin-like growth factor 1 receptor;Insulin-like growth factor 1 receptor alpha chain;Insulin-like growth factor 1 receptor beta chain	IGF1R	Insulin-like growth factor 1 receptor	1	9	9	9	2	3	4	0	1	2	4	3	3	4	4	5	2	2	2	4	3	3	2	3	4	3	3	4	0	1	1	0	1	1	1	1	1	1	1	1	0	0
P08123	P08123	3	3	3	Collagen alpha-2(I) chain	COL1A2	Collagen alpha-2(I) chain	1	3	3	3	1	1	1	1	0	1	0	0	1	1	0	0	0	0	0	0	0	0	0	0	0	1	0	0	2	0	0	0	2	0	1	1	0	1	0	1	0	0
P08133	P08133	41	41	41	Annexin A6	ANXA6	Annexin A6	1	41	41	41	36	36	38	34	36	35	37	36	36	36	36	34	31	26	28	33	31	28	30	29	29	32	31	26	3	4	4	3	5	4	3	5	3	6	1	5	4	3
P08134	P08134	9	1	1	Rho-related GTP-binding protein RhoC	RHOC	Rho-related GTP-binding protein RhoC	1	9	1	1	9	8	8	8	8	7	8	9	9	8	8	9	5	6	5	7	6	5	7	6	6	6	6	6	6	8	7	6	8	6	7	6	6	7	6	6	6	4
P08174	P08174	9	9	9	Complement decay-accelerating factor	CD55	Complement decay-accelerating factor	1	9	9	9	7	8	7	7	8	7	7	9	8	8	6	8	6	5	4	5	5	6	5	4	5	5	5	5	3	3	3	3	3	2	2	2	2	4	2	2	5	3
P08195	P08195	35	35	35	4F2 cell-surface antigen heavy chain	SLC3A2	4F2 cell-surface antigen heavy chain	1	35	35	35	26	27	30	28	29	30	28	27	29	28	31	30	30	28	28	33	32	32	30	29	33	31	32	28	32	32	31	31	32	30	31	31	31	32	32	32	22	21
P08236	P08236	3	3	3	Beta-glucuronidase	GUSB	Beta-glucuronidase	1	3	3	3	0	0	0	0	0	0	1	0	0	1	0	0	0	0	0	0	0	0	0	0	0	0	0	0	2	3	1	2	3	3	2	0	2	0	2	3	1	0
P08237	P08237	7	6	6	ATP-dependent 6-phosphofructokinase, muscle type	PFKM	ATP-dependent 6-phosphofructokinase, muscle type	1	7	6	6	2	2	1	0	4	0	4	2	2	1	2	1	2	2	2	4	3	2	3	1	4	3	3	1	1	0	1	1	1	1	2	1	1	1	1	2	0	0
P08238;Q58FF7;Q58FG1	P08238	38;13;1	21;5;0	20;5;0	Heat shock protein HSP 90-beta	HSP90AB1	Heat shock protein HSP 90-beta	3	38	21	20	30	34	33	24	26	28	35	33	32	29	27	29	24	23	22	24	27	24	22	23	26	26	23	22	24	23	26	25	26	24	23	23	25	26	26	23	16	16
P08243	P08243	6	6	6	Asparagine synthetase [glutamine-hydrolyzing]	ASNS	Asparagine synthetase [glutamine-hydrolyzing]	1	6	6	6	3	4	3	2	2	3	4	4	3	2	2	2	3	3	3	4	5	3	4	3	3	3	4	3	5	4	4	4	5	4	3	4	3	3	4	5	2	3
P08514	P08514	3	3	3	Integrin alpha-IIb;Integrin alpha-IIb heavy chain;Integrin alpha-IIb light chain, form 1;Integrin alpha-IIb light chain, form 2	ITGA2B	Integrin alpha-IIb	1	3	3	3	2	2	2	2	2	2	2	2	2	2	2	2	2	2	2	2	2	2	1	2	2	2	1	2	1	0	0	0	0	0	0	0	0	0	0	1	0	0
P08559;P29803	P08559	4;1	4;1	4;1	Pyruvate dehydrogenase E1 component subunit alpha, somatic form, mitochondrial	PDHA1	Pyruvate dehydrogenase E1 component subunit alpha, somatic form, mitochondrial	2	4	4	4	0	0	0	0	0	0	0	0	0	0	0	0	0	0	0	0	0	0	0	0	0	0	0	0	0	0	0	0	0	0	0	0	0	0	0	0	3	3
P08567	P08567	5	5	5	Pleckstrin	PLEK	Pleckstrin	1	5	5	5	3	3	3	3	2	2	3	3	3	3	3	3	0	0	0	0	0	0	0	0	1	0	0	0	4	4	4	4	3	4	5	4	4	4	4	3	0	1
P08572	P08572	14	14	13	Collagen alpha-2(IV) chain;Canstatin	COL4A2	Collagen alpha-2(IV) chain	1	14	14	13	12	13	13	13	13	13	12	13	12	14	14	14	0	1	0	1	0	0	0	0	0	1	0	0	13	12	12	12	12	12	12	11	12	12	12	12	8	9
P08575	P08575	2	2	2	Receptor-type tyrosine-protein phosphatase C	PTPRC	Receptor-type tyrosine-protein phosphatase C	1	2	2	2	1	1	0	0	0	0	1	1	1	0	1	1	0	0	0	0	0	0	0	0	0	0	0	0	0	0	0	0	0	0	0	0	0	0	0	0	0	0
P08603	P08603	1	1	1	Complement factor H	CFH	Complement factor H	1	1	1	1	0	0	0	0	0	0	1	1	0	1	0	0	1	1	0	1	0	1	0	0	0	1	0	0	0	0	0	0	0	0	0	0	0	0	0	0	0	0
P08621	P08621	5	5	5	U1 small nuclear ribonucleoprotein 70 kDa	SNRNP70	U1 small nuclear ribonucleoprotein 70 kDa	1	5	5	5	3	4	3	2	1	1	4	4	4	3	3	3	3	4	5	3	4	4	2	4	3	4	4	2	0	1	1	1	0	0	0	1	0	0	0	1	0	0
P08648	P08648	17	17	17	Integrin alpha-5;Integrin alpha-5 heavy chain;Integrin alpha-5 light chain	ITGA5	Integrin alpha-5	1	17	17	17	14	13	13	14	13	13	14	14	14	13	15	14	2	1	1	1	1	1	1	1	3	1	1	1	8	11	10	10	11	15	14	7	11	12	12	12	1	2
P08670;P41219;Q16352;P07196;P07197	P08670	17;3;1;1;1	14;1;1;1;1	12;1;0;0;0	Vimentin	VIM	Vimentin	5	17	14	12	11	12	11	11	9	9	12	12	12	11	11	10	3	3	2	4	3	3	3	3	4	3	4	4	1	1	3	3	4	3	3	3	1	5	2	5	8	11
P08708	P08708	1	1	1	40S ribosomal protein S17	RPS17	40S ribosomal protein S17	1	1	1	1	0	1	0	0	0	1	1	1	1	1	0	0	1	1	0	1	1	1	1	1	1	1	1	0	0	1	1	1	0	0	1	1	1	0	1	1	0	0
P08754;P11488;P19087;A8MTJ3	P08754	20;2;2;2	14;0;0;0	14;0;0;0	Guanine nucleotide-binding protein G(k) subunit alpha	GNAI3	Guanine nucleotide-binding protein G(i) subunit alpha	4	20	14	14	18	17	17	18	16	16	20	18	18	17	19	17	15	13	13	16	16	15	12	13	16	16	14	11	13	17	14	15	12	15	14	14	12	15	15	14	13	12
P08758	P08758	28	28	28	Annexin A5	ANXA5	Annexin A5	1	28	28	28	26	26	27	25	25	25	27	27	25	26	27	26	18	15	15	19	18	18	15	16	18	21	19	15	27	24	26	26	26	27	25	26	27	27	23	25	18	13
P08865	P08865	12	12	12	40S ribosomal protein SA	RPSA	40S ribosomal protein SA	1	12	12	12	8	7	8	7	7	7	9	8	9	7	8	7	6	6	6	6	7	5	6	8	7	7	5	4	10	10	11	11	10	12	11	9	7	8	9	8	3	4
P08922	P08922	1	1	1	Proto-oncogene tyrosine-protein kinase ROS	ROS1	Proto-oncogene tyrosine-protein kinase ROS	1	1	1	1	0	0	0	0	0	0	0	0	0	0	0	0	0	0	0	0	0	0	0	0	0	0	0	0	0	0	0	0	0	0	0	0	0	0	0	0	0	0
P08962	P08962	5	5	5	CD63 antigen	CD63	CD63 antigen	1	5	5	5	4	4	3	4	3	4	4	4	4	3	4	3	0	0	0	0	1	1	0	0	0	0	1	0	1	3	2	2	2	2	3	1	3	3	2	3	1	2
P09001	P09001	1	1	1	39S ribosomal protein L3, mitochondrial	MRPL3	39S ribosomal protein L3, mitochondrial	1	1	1	1	0	0	0	0	0	0	0	0	0	0	0	0	0	0	0	0	0	0	0	0	0	0	0	0	0	0	0	0	0	0	0	0	0	0	0	0	0	1
P09110	P09110	4	4	4	3-ketoacyl-CoA thiolase, peroxisomal	ACAA1	3-ketoacyl-CoA thiolase, peroxisomal	1	4	4	4	0	0	0	0	0	0	0	0	0	0	0	0	1	1	1	1	1	2	1	0	1	1	1	1	1	0	0	0	0	0	0	0	0	0	0	0	3	1
P09211	P09211	12	12	12	Glutathione S-transferase P	GSTP1	Glutathione S-transferase P	1	12	12	12	4	7	7	7	6	5	5	7	7	6	7	8	0	0	1	2	0	0	0	0	0	0	0	1	8	7	7	8	8	7	10	8	7	7	8	9	4	7
P09382	P09382	7	7	7	Galectin-1	LGALS1	Galectin-1	1	7	7	7	1	1	2	0	1	1	1	1	2	2	2	2	1	0	0	2	3	1	1	1	2	2	1	2	6	7	5	7	7	7	7	7	7	7	6	7	4	5
P09467	P09467	2	2	2	Fructose-1,6-bisphosphatase 1	FBP1	Fructose-1,6-bisphosphatase 1	1	2	2	2	0	0	0	0	0	0	0	0	0	0	0	0	1	1	1	1	1	1	1	1	1	1	1	1	0	0	0	0	0	0	0	0	0	0	0	0	0	0
P09471	P09471	4	2	2	Guanine nucleotide-binding protein G(o) subunit alpha	GNAO1	Guanine nucleotide-binding protein G(o) subunit alpha	1	4	2	2	3	3	3	3	2	3	4	4	3	4	4	4	2	3	2	2	2	2	2	2	2	2	2	2	2	2	1	2	2	2	2	2	1	2	2	2	3	3
P09496	P09496	3	3	3	Clathrin light chain A	CLTA	Clathrin light chain A	1	3	3	3	3	3	3	3	3	2	1	2	3	3	2	3	0	0	0	2	0	0	0	0	0	2	1	0	0	0	0	0	1	0	0	1	0	0	1	0	0	0
P09497	P09497	4	4	4	Clathrin light chain B	CLTB	Clathrin light chain B	1	4	4	4	3	1	1	2	4	2	2	4	2	4	2	2	0	0	0	1	0	1	1	0	0	0	0	0	0	0	1	0	0	0	2	1	1	2	0	1	0	0
P09525	P09525	23	23	23	Annexin A4	ANXA4	Annexin A4	1	23	23	23	19	18	18	16	19	20	20	19	20	18	21	18	13	9	10	13	17	12	14	15	15	14	14	11	17	20	19	20	19	19	18	18	17	21	20	17	10	12
P09543	P09543	23	23	23	2,3-cyclic-nucleotide 3-phosphodiesterase	CNP	2,3-cyclic-nucleotide 3-phosphodiesterase	1	23	23	23	21	22	20	19	16	20	21	20	21	20	18	17	7	8	9	14	11	9	6	8	8	12	11	8	5	7	9	4	9	9	9	7	3	8	7	5	9	9
P09622	P09622	11	11	11	Dihydrolipoyl dehydrogenase, mitochondrial	DLD	Dihydrolipoyl dehydrogenase, mitochondrial	1	11	11	11	0	0	0	0	0	0	0	0	0	0	0	0	0	0	0	0	0	0	0	0	0	0	0	0	0	1	0	0	0	0	0	0	0	1	0	0	8	6
P09651;Q32P51	P09651;Q32P51	4;2	4;2	4;2	Heterogeneous nuclear ribonucleoprotein A1;Heterogeneous nuclear ribonucleoprotein A1, N-terminally processed;Heterogeneous nuclear ribonucleoprotein A1-like 2	HNRNPA1;HNRNPA1L2	Heterogeneous nuclear ribonucleoprotein A1;Heterogeneous nuclear ribonucleoprotein A1-like 2	2	4	4	4	1	3	2	0	1	3	3	2	3	3	3	2	1	0	0	0	1	0	0	0	0	0	0	0	0	0	1	1	1	1	1	1	0	1	1	1	0	1
P09758	P09758	12	12	12	Tumor-associated calcium signal transducer 2	TACSTD2	Tumor-associated calcium signal transducer 2	1	12	12	12	0	0	0	0	0	0	0	0	0	0	0	0	9	9	10	10	8	10	9	8	7	8	10	10	11	10	11	9	10	10	10	11	11	9	10	11	8	9
P09871	P09871	3	3	2	Complement C1s subcomponent;Complement C1s subcomponent heavy chain;Complement C1s subcomponent light chain	C1S	Complement C1s subcomponent	1	3	3	2	0	0	0	0	0	0	0	0	0	0	0	0	0	1	0	1	1	0	1	0	1	0	1	0	2	3	2	2	2	2	2	2	2	2	2	1	1	1
P09874	P09874	32	32	32	Poly [ADP-ribose] polymerase 1	PARP1	Poly [ADP-ribose] polymerase 1	1	32	32	32	28	29	26	25	26	22	28	27	24	23	25	24	15	13	13	18	18	14	14	13	20	15	12	12	18	15	10	11	12	12	11	18	8	15	10	13	3	3
P09936	P09936	6	6	6	Ubiquitin carboxyl-terminal hydrolase isozyme L1	UCHL1	Ubiquitin carboxyl-terminal hydrolase isozyme L1	1	6	6	6	5	5	5	3	3	4	5	5	4	2	3	3	0	0	0	1	0	0	1	1	0	1	0	0	0	0	0	0	0	0	0	0	0	0	0	0	0	0
P09960	P09960	8	8	8	Leukotriene A-4 hydrolase	LTA4H	Leukotriene A-4 hydrolase	1	8	8	8	4	5	1	2	3	2	5	3	5	4	4	4	0	0	0	2	1	1	1	1	1	2	1	2	1	0	2	1	1	3	2	1	1	0	1	2	1	1
P09972	P09972	7	3	3	Fructose-bisphosphate aldolase C	ALDOC	Fructose-bisphosphate aldolase C	1	7	3	3	5	6	4	4	4	5	5	6	5	4	5	4	2	2	2	2	2	2	2	2	3	3	3	3	4	4	5	5	5	4	3	4	3	6	4	4	1	2
P0C0L4;P0C0L5	P0C0L4;P0C0L5	21;20	10;10	10;10	Complement C4-A;Complement C4 beta chain;Complement C4-A alpha chain;C4a anaphylatoxin;C4b-A;C4d-A;Complement C4 gamma chain;Complement C4-B;Complement C4 beta chain;Complement C4-B alpha chain;C4a anaphylatoxin;C4b-B;C4d-B;Complement C4 gamma chain	C4A;C4B	Complement C4-A;Complement C4-B	2	21	10	10	13	11	10	10	10	10	10	10	10	10	9	11	9	9	9	11	11	10	9	10	9	10	11	8	18	17	17	17	17	17	17	17	17	18	17	17	10	14
Q71UI9;P0C0S5	Q71UI9;P0C0S5	6;6	4;4	4;4	Histone H2A.V;Histone H2A.Z	H2AFV;H2AFZ	Histone H2A.V;Histone H2A.Z	2	6	4	4	6	6	6	6	6	5	6	6	6	5	5	6	4	5	4	5	4	4	5	4	5	5	5	5	3	3	3	4	3	3	3	3	3	5	4	4	2	2
Q99878;Q96KK5;Q9BTM1;P0C0S8	Q99878;Q96KK5;Q9BTM1;P0C0S8	10;10;10;10	10;10;10;10	0;0;0;0	Histone H2A type 1-J;Histone H2A type 1-H;Histone H2A.J;Histone H2A type 1	HIST1H2AJ;HIST1H2AH;H2AFJ;HIST1H2AG	Histone H2A type 1-J;Histone H2A type 1-H;Histone H2A.J;Histone H2A type 1	4	10	10	0	9	9	9	9	9	9	9	9	9	9	9	9	10	10	8	10	9	10	10	10	10	10	10	10	7	8	7	8	7	8	8	6	6	7	7	7	4	4
P0DJI8;P0DJI9	P0DJI8;P0DJI9	2;1	2;1	2;1	Serum amyloid A-1 protein;Amyloid protein A;Serum amyloid protein A(2-104);Serum amyloid protein A(3-104);Serum amyloid protein A(2-103);Serum amyloid protein A(2-102);Serum amyloid protein A(4-101);Serum amyloid A-2 protein	SAA1;SAA2	Serum amyloid A-1 protein;Serum amyloid A-2 proteincur	2	2	2	2	0	0	0	0	0	0	0	0	0	0	0	0	0	0	0	0	0	0	0	0	0	0	0	1	1	1	1	1	1	1	0	0	2	1	1	1	1	1
Q01105;P0DME0	Q01105;P0DME0	3;3	3;3	3;3	Protein SET;Protein SETSIP	SET;SETSIP	Protein SET;Protein SETSIP	2	3	3	3	1	1	1	1	1	1	1	1	1	2	1	1	1	1	1	2	1	1	1	1	1	2	1	0	0	0	0	0	0	0	0	0	0	0	0	0	0	0
P0DMV9;P0DMV8	P0DMV9;P0DMV8	44;44	44;44	24;24	Heat shock 70 kDa protein 1B;Heat shock 70 kDa protein 1A	HSPA1B;HSPA1A	Heat shock 70 kDa protein 1B;Heat shock 70 kDa protein 1A	2	44	44	24	41	39	41	41	40	40	40	42	42	41	41	44	28	27	24	28	30	28	29	32	33	29	29	29	27	28	29	27	27	26	29	27	26	26	24	26	13	14
P0DN76;Q01081;Q8WU68	P0DN76;Q01081;Q8WU68	4;4;2	4;4;2	4;4;2	Splicing factor U2AF 35 kDa subunit;Splicing factor U2AF 26 kDa subunit	U2AF1;U2AF1L4	Splicing factor U2AF 35 kDa subunit-like protein;Splicing factor U2AF 35 kDa subunit;Splicing factor U2AF 26 kDa subunit	3	4	4	4	1	2	1	0	1	1	3	2	1	1	2	2	2	2	1	3	4	2	2	2	1	3	2	3	0	0	1	0	1	0	2	1	1	0	0	0	0	0
P0DN79;P35520	P0DN79;P35520	2;2	2;2	2;2	Cystathionine beta-synthase	CBS	Cystathionine beta-synthase-like protein;Cystathionine beta-synthase	2	2	2	2	0	0	0	0	0	0	2	2	2	1	1	0	0	0	0	0	0	0	0	0	0	1	0	0	0	0	0	0	0	0	0	0	0	0	0	0	0	0
P0DOX8;P01709;P01706;B9A064;P0DOY3;P0DOY2;P0CG04;P0CF74;A0M8Q6	P0DOX8;P01709;P01706;B9A064	4;2;2;2;1;1;1;1;1	3;1;1;2;1;1;1;1;1	3;1;1;2;1;1;1;1;1	Ig lambda chain V-II region MGC;Ig lambda chain V-II region BOH;Immunoglobulin lambda-like polypeptide 5	IGLL5	Immunoglobulin lambda-1 light chain;Immunoglobulin lambda variable 2-8;Immunoglobulin lambda variable 2-11;Immunoglobulin lambda-like polypeptide 5	9	4	3	3	2	2	3	1	1	1	2	2	3	0	1	1	1	1	1	1	1	1	1	1	1	1	1	2	2	2	2	2	1	1	1	1	1	2	0	0	0	0
P0DP25;P0DP24;P0DP23;P27482;P02585	P0DP25;P0DP24;P0DP23	14;14;14;2;1	14;14;14;2;1	14;14;14;2;1			Calmodulin-3;Calmodulin-2;Calmodulin-1	5	14	14	14	12	12	14	12	11	11	12	13	12	13	12	12	8	8	8	9	8	9	8	7	8	9	9	8	8	9	8	7	10	8	9	7	7	8	7	8	7	6
P10114	P10114	7	1	1	Ras-related protein Rap-2a	RAP2A	Ras-related protein Rap-2a	1	7	1	1	5	6	7	5	6	7	7	7	7	6	7	6	5	2	2	4	4	4	3	3	3	3	3	3	2	4	3	4	3	5	3	4	4	3	3	3	2	3
P10253	P10253	8	8	8	Lysosomal alpha-glucosidase;76 kDa lysosomal alpha-glucosidase;70 kDa lysosomal alpha-glucosidase	GAA	Lysosomal alpha-glucosidase	1	8	8	8	0	1	1	0	1	0	2	1	0	2	2	0	6	4	5	5	4	5	5	4	3	5	4	5	0	0	0	0	0	0	0	0	0	0	0	0	1	1
P10301	P10301	3	1	1	Ras-related protein R-Ras	RRAS	Ras-related protein R-Ras	1	3	1	1	1	2	3	2	2	2	2	2	2	2	2	2	3	2	2	3	2	2	2	2	2	1	2	2	1	1	3	2	2	1	1	1	2	1	2	1	3	3
P10321	P10321	12	8	5	HLA class I histocompatibility antigen, Cw-7 alpha chain	HLA-C	HLA class I histocompatibility antigen, C alpha chain	1	12	8	5	9	9	8	8	9	8	9	10	8	7	8	7	2	2	2	4	3	3	3	3	4	4	3	4	8	9	6	9	7	8	8	7	8	7	8	7	7	7
P10415	P10415	2	2	2	Apoptosis regulator Bcl-2	BCL2	Apoptosis regulator Bcl-2	1	2	2	2	0	0	0	0	0	0	0	0	0	0	0	0	1	0	1	1	1	2	1	1	0	1	1	1	0	0	0	0	0	0	0	0	0	0	0	0	0	0
P10515	P10515	5	5	5	Dihydrolipoyllysine-residue acetyltransferase component of pyruvate dehydrogenase complex, mitochondrial	DLAT	Dihydrolipoyllysine-residue acetyltransferase component of pyruvate dehydrogenase complex, mitochondrial	1	5	5	5	0	2	2	0	1	0	1	1	0	0	0	0	2	2	2	2	2	3	2	2	2	2	2	2	0	2	2	1	2	2	0	1	0	0	2	0	4	3
P10586	P10586	14	14	8	Receptor-type tyrosine-protein phosphatase F	PTPRF	Receptor-type tyrosine-protein phosphatase F	1	14	14	8	5	8	7	2	5	5	9	8	7	9	8	6	7	6	7	7	7	7	5	6	3	7	5	7	1	1	1	1	2	1	1	0	1	3	0	0	0	0
P10599	P10599	7	7	7	Thioredoxin	TXN	Thioredoxin	1	7	7	7	7	6	4	7	6	5	5	5	6	6	6	6	2	2	1	3	3	3	2	3	1	4	2	3	6	6	3	5	4	5	4	4	4	5	4	4	3	3
P10619	P10619	2	2	2	Lysosomal protective protein;Lysosomal protective protein 32 kDa chain;Lysosomal protective protein 20 kDa chain	CTSA	Lysosomal protective protein	1	2	2	2	0	0	0	0	0	0	0	0	0	0	0	0	1	1	0	0	1	1	0	0	0	1	1	0	1	1	0	1	0	1	0	0	0	0	0	0	1	1
P10620	P10620	5	5	5	Microsomal glutathione S-transferase 1	MGST1	Microsomal glutathione S-transferase 1	1	5	5	5	0	0	0	0	0	0	0	0	0	0	0	0	3	2	3	3	3	3	3	2	3	1	3	1	3	3	3	2	3	2	2	4	3	3	3	3	4	3
P10643	P10643	3	2	2	Complement component C7	C7	Complement component C7	1	3	2	2	1	1	1	1	1	1	1	1	1	1	1	1	0	1	0	1	1	0	1	1	1	1	1	0	3	3	3	3	3	3	3	3	3	3	3	3	1	2
P10644	P10644	3	3	3	cAMP-dependent protein kinase type I-alpha regulatory subunit;cAMP-dependent protein kinase type I-alpha regulatory subunit, N-terminally processed	PRKAR1A	cAMP-dependent protein kinase type I-alpha regulatory subunit	1	3	3	3	2	2	2	1	1	1	0	1	1	1	1	1	1	1	2	2	1	2	1	2	2	1	1	2	0	1	0	0	0	0	0	0	0	0	0	0	0	0
P10768	P10768	8	8	8	S-formylglutathione hydrolase	ESD	S-formylglutathione hydrolase	1	8	8	8	3	3	4	2	1	2	3	5	2	3	3	3	2	1	2	4	3	4	2	4	2	3	3	2	5	3	5	4	3	3	4	4	2	3	4	3	2	2
P10809	P10809	29	29	29	60 kDa heat shock protein, mitochondrial	HSPD1	60 kDa heat shock protein, mitochondrial	1	29	29	29	2	3	1	1	0	1	4	2	3	5	2	3	0	1	1	4	4	4	1	1	2	3	1	1	4	5	5	3	5	5	2	7	1	11	5	5	21	21
P10909	P10909	11	11	11	Clusterin;Clusterin beta chain;Clusterin alpha chain	CLU	Clusterin	1	11	11	11	6	6	7	4	6	5	6	6	6	6	5	7	9	10	10	10	9	10	9	8	9	9	7	9	8	10	8	7	10	9	8	9	8	7	8	8	3	3
P11021	P11021	39	38	38	78 kDa glucose-regulated protein	HSPA5	Endoplasmic reticulum chaperone BiP	1	39	38	38	21	22	19	20	18	22	23	21	22	21	20	22	26	27	26	30	29	28	24	24	29	31	28	25	28	30	26	29	29	32	27	28	26	30	26	29	27	29
P11047;REV__Q9NQS7;Q9Y6N6	P11047	78;1;1	78;1;1	78;1;1	Laminin subunit gamma-1	LAMC1	Laminin subunit gamma-1	3	78	78	78	41	56	45	38	29	37	44	47	31	35	31	29	62	56	59	68	67	65	61	63	76	68	69	62	48	31	29	35	33	33	32	42	36	37	38	32	12	16
P11117	P11117	3	3	3	Lysosomal acid phosphatase	ACP2	Lysosomal acid phosphatase	1	3	3	3	2	2	2	1	1	1	2	3	2	2	3	2	1	0	1	1	1	1	1	1	1	0	1	2	0	0	0	0	1	0	0	0	0	0	0	0	0	0
P11142	P11142	43	40	29	Heat shock cognate 71 kDa protein	HSPA8	Heat shock cognate 71 kDa protein	1	43	40	29	40	41	39	36	40	37	37	41	38	36	40	42	32	30	30	32	33	31	31	33	31	33	32	31	35	36	36	36	35	34	35	34	33	35	35	35	18	20
P11166	P11166	11	11	10	Solute carrier family 2, facilitated glucose transporter member 1	SLC2A1	Solute carrier family 2, facilitated glucose transporter member 1	1	11	11	10	8	7	8	6	7	7	7	7	6	8	7	8	9	9	8	10	11	9	9	9	8	10	8	8	5	6	6	6	6	6	6	6	5	6	5	6	2	2
P11171	P11171	12	10	10	Protein 4.1	EPB41	Protein 4.1	1	12	10	10	9	8	7	7	6	8	7	7	8	7	6	9	3	2	2	2	3	2	2	2	2	1	2	2	0	1	1	0	1	1	1	0	0	1	0	0	0	0
P11177	P11177	6	6	6	Pyruvate dehydrogenase E1 component subunit beta, mitochondrial	PDHB	Pyruvate dehydrogenase E1 component subunit beta, mitochondrial	1	6	6	6	0	0	0	0	0	0	0	0	0	0	0	0	0	0	0	0	0	0	0	0	0	0	0	0	0	0	0	0	0	0	0	0	0	0	0	0	5	5
P11182	P11182	2	2	2	Lipoamide acyltransferase component of branched-chain alpha-keto acid dehydrogenase complex, mitochondrial	DBT	Lipoamide acyltransferase component of branched-chain alpha-keto acid dehydrogenase complex, mitochondrial	1	2	2	2	1	0	0	0	0	0	0	1	0	0	0	0	0	0	0	0	0	0	0	0	0	1	0	0	0	0	0	0	0	0	0	0	0	0	0	0	1	1
P11216	P11216	31	31	23	Glycogen phosphorylase, brain form	PYGB	Glycogen phosphorylase, brain form	1	31	31	23	7	8	5	2	5	2	9	6	6	4	6	8	7	6	7	6	11	7	9	8	7	9	5	6	29	28	28	28	29	28	29	27	29	24	28	28	13	12
P11217	P11217	12	3	3	Glycogen phosphorylase, muscle form	PYGM	Glycogen phosphorylase, muscle form	1	12	3	3	5	5	4	3	7	3	6	4	4	4	5	6	2	3	2	4	6	2	4	3	4	4	1	1	9	10	10	8	9	8	8	8	8	8	9	8	1	1
P11233	P11233	9	9	4	Ras-related protein Ral-A	RALA	Ras-related protein Ral-A	1	9	9	4	8	9	6	8	7	7	8	8	8	9	8	7	6	7	7	7	7	6	6	6	5	8	8	6	5	6	5	7	6	5	4	4	5	5	4	6	3	3
P11234	P11234	8	3	3	Ras-related protein Ral-B	RALB	Ras-related protein Ral-B	1	8	3	3	7	8	6	7	6	6	7	7	8	8	7	6	3	6	4	5	4	4	6	4	4	5	5	5	3	5	3	6	5	5	4	4	3	4	3	4	3	3
P11279	P11279	5	5	5	Lysosome-associated membrane glycoprotein 1	LAMP1	Lysosome-associated membrane glycoprotein 1	1	5	5	5	3	2	3	3	2	3	3	3	1	2	2	3	5	5	5	5	5	4	5	4	5	5	5	3	2	4	3	4	3	3	3	3	3	4	3	4	4	5
P11310	P11310	4	4	4	Medium-chain specific acyl-CoA dehydrogenase, mitochondrial	ACADM	Medium-chain specific acyl-CoA dehydrogenase, mitochondrial	1	4	4	4	0	0	0	0	0	0	0	0	0	0	0	0	0	0	0	0	0	0	0	0	0	0	0	0	0	0	0	0	0	0	0	0	0	0	0	0	3	3
P11387;Q969P6	P11387	26;3	26;3	26;3	DNA topoisomerase 1	TOP1	DNA topoisomerase 1	2	26	26	26	18	18	20	17	17	14	20	18	16	13	18	17	20	18	18	19	20	17	19	18	25	19	16	16	14	11	8	8	12	7	12	14	12	12	11	11	0	0
P11388	P11388	34	34	28	DNA topoisomerase 2-alpha	TOP2A	DNA topoisomerase 2-alpha	1	34	34	28	10	21	13	5	6	9	18	14	11	13	12	9	21	12	16	19	20	12	11	16	33	13	16	13	0	0	0	0	1	3	0	1	0	0	1	1	1	0
P11413	P11413	12	12	12	Glucose-6-phosphate 1-dehydrogenase	G6PD	Glucose-6-phosphate 1-dehydrogenase	1	12	12	12	3	3	4	1	2	3	4	5	1	4	4	2	7	9	8	7	9	8	10	10	5	8	7	6	5	7	5	6	6	6	5	5	2	4	6	5	4	5
P11498	P11498	2	2	2	Pyruvate carboxylase, mitochondrial	PC	Pyruvate carboxylase, mitochondrial	1	2	2	2	0	0	0	0	0	0	0	0	0	0	0	0	0	0	0	0	0	0	0	0	0	0	0	0	0	0	0	0	0	0	0	0	0	0	0	0	2	2
P11532	P11532	2	2	2	Dystrophin	DMD	Dystrophin	1	2	2	2	1	1	0	0	1	0	1	1	1	1	1	1	0	1	0	1	2	1	1	1	0	0	0	0	0	0	1	0	1	1	0	1	0	1	1	0	1	0
P11586	P11586	21	21	21	C-1-tetrahydrofolate synthase, cytoplasmic;Methylenetetrahydrofolate dehydrogenase;Methenyltetrahydrofolate cyclohydrolase;Formyltetrahydrofolate synthetase;C-1-tetrahydrofolate synthase, cytoplasmic, N-terminally processed	MTHFD1	C-1-tetrahydrofolate synthase, cytoplasmic	1	21	21	21	7	12	10	4	2	5	13	12	7	6	11	7	9	7	10	10	11	11	10	9	9	9	11	9	5	8	7	8	7	7	9	7	8	4	8	7	2	3
P11717	P11717	61	61	61	Cation-independent mannose-6-phosphate receptor	IGF2R	Cation-independent mannose-6-phosphate receptor	1	61	61	61	36	45	50	33	38	39	41	42	42	41	43	41	35	29	31	37	41	33	29	34	27	39	34	31	44	40	42	32	41	37	36	35	28	33	31	28	8	3
P11766	P11766	5	5	5	Alcohol dehydrogenase class-3	ADH5	Alcohol dehydrogenase class-3	1	5	5	5	3	2	3	2	3	2	3	4	1	2	3	2	1	1	1	1	2	1	2	2	1	1	1	1	1	0	1	2	0	2	2	0	0	0	1	1	0	0
P11940;Q9H361;Q13310	P11940;Q9H361;Q13310	6;3;3	6;3;3	6;3;3	Polyadenylate-binding protein 1;Polyadenylate-binding protein 3;Polyadenylate-binding protein 4	PABPC1;PABPC3;PABPC4	Polyadenylate-binding protein 1;Polyadenylate-binding protein 3;Polyadenylate-binding protein 4	3	6	6	6	3	3	3	2	3	3	3	3	3	2	2	4	1	2	1	1	2	1	1	2	1	2	1	1	3	2	4	3	2	3	2	0	1	2	3	3	0	0
P12004	P12004	4	4	4	Proliferating cell nuclear antigen	PCNA	Proliferating cell nuclear antigen	1	4	4	4	3	3	4	2	3	3	4	4	4	2	4	1	0	0	0	0	0	0	0	0	1	0	0	1	2	1	2	2	2	3	2	3	2	1	2	3	1	1
P12109	P12109	12	12	12	Collagen alpha-1(VI) chain	COL6A1	Collagen alpha-1(VI) chain	1	12	12	12	3	6	5	4	6	4	5	7	3	3	6	3	10	11	11	12	12	10	11	10	11	11	10	11	0	1	0	0	0	0	0	0	0	0	0	0	1	1
P12110	P12110	5	5	5	Collagen alpha-2(VI) chain	COL6A2	Collagen alpha-2(VI) chain	1	5	5	5	0	0	0	0	0	0	0	2	1	2	0	0	5	5	5	4	5	5	5	5	4	4	4	4	0	0	0	0	0	0	1	0	1	0	0	0	0	0
P12111	P12111	12	12	12	Collagen alpha-3(VI) chain	COL6A3	Collagen alpha-3(VI) chain	1	12	12	12	2	3	0	0	1	0	2	4	2	2	3	0	11	10	11	12	12	10	12	10	7	11	11	9	0	1	0	0	0	0	0	1	0	0	0	0	1	1
P12236	P12236	9	2	1	ADP/ATP translocase 3;ADP/ATP translocase 3, N-terminally processed	SLC25A6	ADP/ATP translocase 3	1	9	2	1	3	5	3	3	3	4	5	6	4	4	5	5	3	4	3	4	6	4	4	4	3	5	3	2	2	1	1	1	1	2	1	1	1	2	0	1	4	3
P12259	P12259	22	9	9	Coagulation factor V;Coagulation factor V heavy chain;Coagulation factor V light chain	F5	Coagulation factor V	1	22	9	9	13	13	13	13	13	13	13	13	13	12	11	12	10	10	10	11	11	10	10	11	9	11	9	9	14	17	16	16	15	16	17	16	16	14	15	17	5	6
P12268	P12268	13	13	13	Inosine-5-monophosphate dehydrogenase 2	IMPDH2	Inosine-5-monophosphate dehydrogenase 2	1	13	13	13	6	5	4	4	3	6	6	7	7	7	6	6	9	8	7	9	10	9	8	7	6	9	6	7	10	9	7	10	6	9	11	6	8	6	7	6	2	2
P12273	P12273	5	5	5	Prolactin-inducible protein	PIP	Prolactin-inducible protein	1	5	5	5	2	5	0	3	3	2	3	4	3	4	4	3	0	0	0	0	0	0	0	0	0	0	0	0	0	2	0	0	0	0	0	0	0	2	3	0	0	0
P12277	P12277	15	15	15	Creatine kinase B-type	CKB	Creatine kinase B-type	1	15	15	15	13	15	15	14	12	14	15	15	15	14	15	15	0	0	0	0	1	0	0	0	0	0	0	0	0	1	1	1	1	0	0	1	1	1	1	2	0	0
P12429	P12429	17	17	17	Annexin A3	ANXA3	Annexin A3	1	17	17	17	1	2	2	1	2	1	2	3	5	3	2	3	4	2	3	6	3	6	3	3	1	5	4	3	11	11	12	10	12	10	11	7	11	14	12	10	9	9
P12532;P17540	P12532	9;3	8;2	8;2	Creatine kinase U-type, mitochondrial	CKMT1A	Creatine kinase U-type, mitochondrial	2	9	8	8	5	6	3	7	5	6	7	6	5	4	5	8	6	4	4	7	5	4	6	5	5	6	5	7	8	9	6	5	8	6	9	7	5	7	7	8	4	5
P12814	P12814	32	18	17	Alpha-actinin-1	ACTN1	Alpha-actinin-1	1	32	18	17	11	12	11	11	13	11	12	15	11	12	13	12	10	8	7	11	9	10	8	5	8	12	10	8	16	17	18	14	16	16	13	17	13	18	14	17	25	22
P12830	P12830	8	8	8	Cadherin-1;E-Cad/CTF1;E-Cad/CTF2;E-Cad/CTF3	CDH1	Cadherin-1	1	8	8	8	0	0	0	0	0	0	1	1	1	0	1	0	5	5	5	5	6	5	5	5	5	7	5	6	2	2	2	4	5	3	3	1	3	2	2	2	1	2
P12882	P12882	47	46	5	Myosin-1	MYH1	Myosin-1	1	47	46	5	0	0	0	2	47	1	2	3	1	4	1	2	3	4	4	5	4	3	3	3	4	3	4	3	2	1	1	1	1	2	2	1	2	1	1	1	2	2
P12883	P12883	38	24	5	Myosin-7	MYH7	Myosin-7	1	38	24	5	1	0	0	1	37	1	1	0	0	1	0	0	4	4	4	4	3	3	3	3	3	3	3	2	2	1	1	1	1	2	2	1	2	1	1	0	2	2
P12931	P12931	10	6	6	Proto-oncogene tyrosine-protein kinase Src	SRC	Proto-oncogene tyrosine-protein kinase Src	1	10	6	6	7	8	7	5	6	5	9	9	9	9	8	7	4	3	3	4	4	3	4	3	3	4	4	3	4	7	7	4	5	6	6	6	4	4	5	5	3	3
P12955	P12955	4	4	4	Xaa-Pro dipeptidase	PEPD	Xaa-Pro dipeptidase	1	4	4	4	2	1	2	2	2	2	3	4	3	3	3	3	0	0	1	1	0	0	0	0	0	0	0	1	1	2	2	1	1	2	1	1	1	1	1	1	0	0
P12956	P12956	13	13	13	X-ray repair cross-complementing protein 6	XRCC6	X-ray repair cross-complementing protein 6	1	13	13	13	3	11	5	1	1	3	4	5	5	5	4	3	8	4	6	7	8	6	6	6	10	5	7	5	7	5	8	3	3	4	5	4	5	3	6	5	0	0
P13010	P13010	16	16	16	X-ray repair cross-complementing protein 5	XRCC5	X-ray repair cross-complementing protein 5	1	16	16	16	4	6	4	0	0	0	7	6	1	2	2	1	7	5	4	9	7	5	5	4	12	8	8	3	8	9	9	11	9	8	9	8	9	7	10	10	0	0
P13073	P13073	4	4	4	Cytochrome c oxidase subunit 4 isoform 1, mitochondrial	COX4I1	Cytochrome c oxidase subunit 4 isoform 1, mitochondrial	1	4	4	4	0	0	0	0	0	0	2	0	0	0	0	0	0	0	0	1	0	0	0	0	0	0	0	0	0	0	0	0	1	0	0	0	0	0	0	0	3	2
P13164;Q01629;Q01628	P13164;Q01629;Q01628	1;1;1	1;1;1	1;1;1	Interferon-induced transmembrane protein 1;Interferon-induced transmembrane protein 2;Interferon-induced transmembrane protein 3	IFITM1;IFITM2;IFITM3	Interferon-induced transmembrane protein 1;Interferon-induced transmembrane protein 2;Interferon-induced transmembrane protein 3	3	1	1	1	0	1	1	0	0	1	1	1	1	1	1	0	0	0	0	1	1	0	0	0	0	1	1	0	1	1	1	1	1	1	1	1	1	1	1	1	0	0
P13224	P13224	1	1	1	Platelet glycoprotein Ib beta chain	GP1BB	Platelet glycoprotein Ib beta chain	1	1	1	1	1	1	1	1	1	1	1	1	1	1	1	1	0	0	0	0	0	0	0	0	1	0	0	0	0	0	0	0	0	0	0	0	0	0	0	0	0	0
P13473	P13473	5	5	5	Lysosome-associated membrane glycoprotein 2	LAMP2	Lysosome-associated membrane glycoprotein 2	1	5	5	5	4	3	3	3	3	4	3	3	4	3	4	4	2	2	1	2	2	2	2	2	2	2	2	2	3	2	5	4	4	5	4	5	4	5	3	5	2	3
P13489	P13489	7	7	7	Ribonuclease inhibitor	RNH1	Ribonuclease inhibitor	1	7	7	7	1	2	0	0	0	1	1	3	3	1	3	2	0	1	1	0	0	2	0	0	0	0	0	0	1	2	2	1	2	1	2	2	3	2	1	3	2	1
P13497;O43897;Q9Y6L7	P13497	4;1;1	4;1;1	4;1;1	Bone morphogenetic protein 1	BMP1	Bone morphogenetic protein 1	3	4	4	4	1	0	1	0	1	1	1	0	1	0	1	0	0	0	0	0	0	1	0	0	0	0	0	0	0	1	1	3	0	2	4	1	3	0	1	3	0	0
P13533	P13533	36	2	2	Myosin-6	MYH6	Myosin-6	1	36	2	2	1	0	0	1	35	2	1	0	1	1	0	0	4	5	5	3	3	4	4	4	4	4	4	3	2	1	1	2	1	2	2	1	2	2	1	0	2	2
P13535	P13535	30	2	1	Myosin-8	MYH8	Myosin-8	1	30	2	1	0	0	0	1	30	1	1	1	0	3	1	0	3	4	2	3	4	3	2	2	1	2	3	3	1	1	1	1	1	1	1	1	1	0	1	1	2	2
P13591	P13591	12	12	12	Neural cell adhesion molecule 1	NCAM1	Neural cell adhesion molecule 1	1	12	12	12	10	9	9	6	6	6	11	10	10	9	11	9	1	0	0	1	1	1	1	1	0	1	0	1	0	0	1	0	0	0	0	0	1	1	1	0	1	1
P13611	P13611	23	23	23	Versican core protein	VCAN	Versican core protein	1	23	23	23	19	21	22	19	17	18	23	22	21	21	21	21	1	1	1	1	1	0	1	1	1	1	1	1	1	0	0	1	0	0	1	1	1	0	1	1	2	0
P13612	P13612	13	13	13	Integrin alpha-4	ITGA4	Integrin alpha-4	1	13	13	13	10	9	9	9	8	10	9	10	11	11	9	10	1	2	1	1	3	1	3	2	2	2	2	2	1	1	1	0	1	0	2	0	0	0	1	1	0	0
P13637	P13637	18	2	1	Sodium/potassium-transporting ATPase subunit alpha-3	ATP1A3	Sodium/potassium-transporting ATPase subunit alpha-3	1	18	2	1	14	15	13	12	13	13	14	15	15	14	15	16	12	11	12	12	14	12	12	13	12	13	12	12	14	12	11	14	13	11	13	12	12	13	13	12	11	11
P13639	P13639	34	34	34	Elongation factor 2	EEF2	Elongation factor 2	1	34	34	34	25	29	26	22	21	22	28	28	28	25	26	27	21	20	19	25	26	20	24	21	26	24	23	19	30	24	26	29	27	26	31	27	26	26	27	25	16	19
P13667	P13667	38	38	38	Protein disulfide-isomerase A4	PDIA4	Protein disulfide-isomerase A4	1	38	38	38	15	16	18	17	16	18	20	18	15	16	16	18	21	22	21	26	22	22	18	17	22	23	19	17	23	22	26	23	23	22	20	27	20	26	22	23	29	26
P13671	P13671	5	5	5	Complement component C6	C6	Complement component C6	1	5	5	5	0	1	0	0	0	0	0	1	2	1	0	0	3	2	3	3	2	3	2	2	3	2	2	2	3	4	5	5	4	5	5	5	4	1	5	4	1	1
P13674	P13674	15	15	15	Prolyl 4-hydroxylase subunit alpha-1	P4HA1	Prolyl 4-hydroxylase subunit alpha-1	1	15	15	15	2	5	2	0	2	3	3	5	2	2	3	3	6	6	6	6	7	7	7	6	6	7	6	5	9	7	7	9	7	9	6	9	7	7	9	10	9	9
P13693;Q56UQ5	P13693;Q56UQ5	3;2	3;2	3;2	Translationally-controlled tumor protein;TPT1-like protein	TPT1	Translationally-controlled tumor protein;TPT1-like protein	2	3	3	3	2	3	2	2	3	1	3	3	3	3	3	1	2	1	1	1	1	1	1	2	2	3	3	3	1	2	1	1	2	2	1	1	1	1	1	1	2	2
P13726	P13726	3	3	3	Tissue factor	F3	Tissue factor	1	3	3	3	0	0	0	0	0	0	0	0	0	0	0	0	0	0	0	0	0	0	0	0	0	0	0	0	3	3	3	3	3	3	3	3	3	3	2	3	0	0
P13747	P13747	3	1	1	HLA class I histocompatibility antigen, alpha chain E	HLA-E	HLA class I histocompatibility antigen, alpha chain E	1	3	1	1	2	2	2	2	2	2	2	2	2	2	2	2	1	1	1	1	1	1	1	1	1	1	1	1	2	2	2	2	2	2	2	2	2	2	2	2	3	2
P13796	P13796	8	2	2	Plastin-2	LCP1	Plastin-2	1	8	2	2	5	5	5	4	5	5	5	5	5	5	5	6	1	2	0	1	0	1	1	0	0	1	1	1	3	1	2	1	2	2	2	2	3	3	1	3	2	3
P13797	P13797	33	33	25	Plastin-3	PLS3	Plastin-3	1	33	33	25	25	26	28	24	21	26	27	27	29	26	26	26	5	4	2	4	6	4	3	2	1	7	2	4	8	8	8	6	9	10	7	8	6	8	5	6	11	10
P13798	P13798	6	6	6	Acylamino-acid-releasing enzyme	APEH	Acylamino-acid-releasing enzyme	1	6	6	6	2	3	3	3	2	3	2	2	4	2	3	3	2	0	1	1	2	1	0	0	0	2	1	1	0	1	1	1	2	0	1	0	1	1	3	3	2	2
P13804	P13804	6	6	6	Electron transfer flavoprotein subunit alpha, mitochondrial	ETFA	Electron transfer flavoprotein subunit alpha, mitochondrial	1	6	6	6	0	0	0	0	0	0	0	0	0	0	0	0	0	0	0	0	0	0	0	0	0	0	0	0	0	0	0	0	0	0	0	0	0	0	0	1	5	4
P13861	P13861	8	8	8	cAMP-dependent protein kinase type II-alpha regulatory subunit	PRKAR2A	cAMP-dependent protein kinase type II-alpha regulatory subunit	1	8	8	8	4	6	7	5	5	7	7	8	8	8	7	8	0	0	0	0	0	0	0	0	1	0	0	0	0	0	0	0	0	0	0	0	0	0	0	0	0	0
P13928;Q5VT79	P13928;Q5VT79	8;7	8;7	8;7	Annexin A8;Annexin A8-like protein 2	ANXA8;ANXA8L2	Annexin A8;Annexin A8-like protein 1	2	8	8	8	2	3	3	2	2	3	3	3	3	3	3	3	2	1	1	1	1	1	1	2	0	1	2	2	6	8	7	7	7	7	6	6	5	7	5	6	4	4
P13929	P13929	6	3	3	Beta-enolase	ENO3	Beta-enolase	1	6	3	3	4	5	4	4	4	4	5	5	5	4	5	4	2	2	3	2	3	2	2	3	2	3	3	3	3	4	3	4	4	4	4	4	4	3	4	3	2	3
P13987	P13987	5	5	5	CD59 glycoprotein	CD59	CD59 glycoprotein	1	5	5	5	4	4	4	4	4	4	4	4	4	4	4	4	3	4	3	4	4	4	3	3	4	4	3	3	4	4	4	4	4	4	4	4	4	4	4	4	4	3
P14174	P14174	4	4	4	Macrophage migration inhibitory factor	MIF	Macrophage migration inhibitory factor	1	4	4	4	3	3	3	2	3	3	3	3	3	3	3	3	2	2	1	2	2	2	0	2	1	2	1	1	2	1	1	2	1	1	2	1	1	0	2	2	2	1
P14209	P14209	4	4	4	CD99 antigen	CD99	CD99 antigen	1	4	4	4	2	3	4	2	2	3	2	3	4	3	2	3	2	2	1	1	1	1	2	2	0	2	2	0	2	2	2	2	2	2	2	2	2	2	2	2	0	0
P14314	P14314	15	15	15	Glucosidase 2 subunit beta	PRKCSH	Glucosidase 2 subunit beta	1	15	15	15	7	8	9	10	9	9	9	8	10	10	9	9	10	8	9	11	11	10	8	8	11	11	9	9	12	12	11	12	11	12	11	11	11	12	11	12	9	12
P14324	P14324	7	7	7	Farnesyl pyrophosphate synthase	FDPS	Farnesyl pyrophosphate synthase	1	7	7	7	2	2	4	4	4	2	3	6	5	4	5	5	0	0	1	1	0	0	0	0	0	0	0	0	5	5	5	6	5	4	5	6	5	6	6	5	4	5
P14373	P14373	3	3	3	Zinc finger protein RFP	TRIM27	Zinc finger protein RFP	1	3	3	3	0	0	0	0	0	0	0	0	0	0	0	0	2	0	1	1	1	0	2	1	2	1	1	0	0	0	0	0	0	0	0	0	0	0	0	0	0	0
P14384	P14384	1	1	1	Carboxypeptidase M	CPM	Carboxypeptidase M	1	1	1	1	1	1	1	1	0	1	1	1	1	1	1	1	0	0	0	0	0	0	0	0	0	0	0	0	0	0	0	0	0	0	0	0	0	0	0	0	0	0
P14406	P14406	1	1	1	Cytochrome c oxidase subunit 7A2, mitochondrial	COX7A2	Cytochrome c oxidase subunit 7A2, mitochondrial	1	1	1	1	0	0	0	0	0	0	0	0	0	0	0	0	0	0	0	0	0	0	0	0	0	0	0	0	0	0	0	0	0	0	0	0	0	1	0	0	1	1
P14543	P14543	34	34	33	Nidogen-1	NID1	Nidogen-1	1	34	34	33	19	31	20	17	15	15	22	17	16	13	14	15	11	8	9	12	12	11	10	10	13	13	12	9	6	3	3	1	4	2	2	7	3	8	3	5	0	1
P14550	P14550	2	2	2	Alcohol dehydrogenase [NADP(+)]	AKR1A1	Aldo-keto reductase family 1 member A1	1	2	2	2	1	1	1	1	1	1	1	1	1	1	1	1	0	0	0	0	1	0	0	1	1	1	0	0	1	1	1	1	0	1	1	1	1	1	1	1	1	0
P14618	P14618	40	40	39	Pyruvate kinase PKM	PKM	Pyruvate kinase PKM	1	40	40	39	31	31	28	26	27	28	33	34	30	28	30	29	22	26	24	28	25	26	23	25	25	24	26	25	33	32	33	33	33	36	33	32	32	28	34	34	24	24
P14625;Q58FF3	P14625	56;5	56;5	54;5	Endoplasmin	HSP90B1	Endoplasmin	2	56	56	54	21	23	19	19	20	17	27	27	24	21	23	20	34	31	30	34	31	31	28	30	29	31	30	30	40	34	36	38	40	39	34	42	34	43	39	42	38	39
P14866	P14866	4	4	4	Heterogeneous nuclear ribonucleoprotein L	HNRNPL	Heterogeneous nuclear ribonucleoprotein L	1	4	4	4	0	2	0	0	0	1	1	0	1	1	1	0	0	0	0	0	0	1	0	0	0	0	0	1	1	0	1	1	1	2	3	0	0	0	3	0	0	0
P14868	P14868	16	16	16	Aspartate--tRNA ligase, cytoplasmic	DARS	Aspartate--tRNA ligase, cytoplasmic	1	16	16	16	5	13	7	3	2	6	10	10	8	7	6	3	5	2	4	4	5	3	4	4	6	5	5	2	9	10	9	8	8	7	10	8	7	4	8	4	1	2
P14923	P14923	32	32	28	Junction plakoglobin	JUP	Junction plakoglobin	1	32	32	28	26	29	26	27	23	27	29	30	30	26	28	29	17	17	17	17	20	14	17	14	11	20	15	14	25	26	27	26	26	25	23	24	22	28	23	27	12	15
P14927	P14927	4	4	4	Cytochrome b-c1 complex subunit 7	UQCRB	Cytochrome b-c1 complex subunit 7	1	4	4	4	0	1	0	1	1	1	2	2	1	0	2	1	0	0	0	0	0	0	0	0	0	0	0	0	0	0	0	0	0	0	0	0	0	0	0	0	3	3
P15121	P15121	7	7	7	Aldose reductase	AKR1B1	Aldo-keto reductase family 1 member B1	1	7	7	7	6	5	4	6	5	5	5	5	5	6	5	6	1	1	1	1	0	2	2	2	0	2	0	1	3	4	4	2	1	2	2	4	2	3	3	2	1	2
P15144	P15144	56	56	56	Aminopeptidase N	ANPEP	Aminopeptidase N	1	56	56	56	11	2	1	2	2	2	3	0	0	1	1	0	1	0	1	2	1	2	1	1	0	1	1	2	47	50	49	52	49	50	50	47	52	49	52	54	42	43
P15151	P15151	6	6	6	Poliovirus receptor	PVR	Poliovirus receptor	1	6	6	6	6	6	6	5	5	5	6	6	6	6	6	5	1	0	0	0	0	0	0	0	1	1	1	0	0	2	2	1	3	3	1	1	1	1	3	2	1	1
P15260	P15260	4	4	4	Interferon gamma receptor 1	IFNGR1	Interferon gamma receptor 1	1	4	4	4	4	3	4	3	3	4	4	3	4	4	4	3	0	0	0	0	0	0	0	0	0	0	0	0	0	0	0	0	0	0	0	0	0	0	0	0	0	0
P15289	P15289	1	1	1	Arylsulfatase A;Arylsulfatase A component B;Arylsulfatase A component C	ARSA	Arylsulfatase A	1	1	1	1	0	0	0	0	0	0	0	0	0	0	0	0	0	0	0	0	0	0	0	0	0	0	0	0	0	0	0	0	0	0	0	0	0	0	0	0	0	0
P15311	P15311	32	23	22	Ezrin	EZR	Ezrin	1	32	23	22	24	24	25	22	23	23	24	25	23	23	25	25	14	14	14	15	18	16	14	15	16	13	13	14	20	24	24	19	22	22	20	19	22	21	23	20	22	22
P15374	P15374	1	1	1	Ubiquitin carboxyl-terminal hydrolase isozyme L3	UCHL3	Ubiquitin carboxyl-terminal hydrolase isozyme L3	1	1	1	1	1	1	1	1	1	1	1	1	1	1	1	1	0	0	0	0	0	0	0	0	0	0	0	0	0	0	0	0	0	0	0	0	0	0	0	0	0	0
P15514	P15514	5	5	5	Amphiregulin	AREG	Amphiregulin	1	5	5	5	0	0	0	1	0	0	0	1	1	0	0	1	0	0	0	0	0	0	0	0	1	0	0	1	2	3	4	4	4	4	3	2	4	3	4	5	1	2
P15529	P15529	8	8	8	Membrane cofactor protein	CD46	Membrane cofactor protein	1	8	8	8	5	7	7	5	7	7	7	7	8	7	7	8	2	1	1	1	1	3	1	5	1	2	2	1	5	5	3	5	5	4	4	4	4	5	3	4	4	3
P15531	P15531	10	10	5	Nucleoside diphosphate kinase A	NME1	Nucleoside diphosphate kinase A	1	10	10	5	6	9	8	8	9	8	9	9	8	9	8	8	2	3	3	5	3	2	3	3	3	3	4	4	5	6	6	4	5	7	3	4	5	4	5	6	6	5
P15559	P15559	5	5	5	NAD(P)H dehydrogenase [quinone] 1	NQO1	NAD(P)H dehydrogenase [quinone] 1	1	5	5	5	0	0	0	0	0	0	0	0	0	0	0	0	1	0	1	0	0	1	0	0	0	1	1	1	4	3	3	3	2	3	3	1	1	0	3	2	1	1
P15586	P15586	10	10	10	N-acetylglucosamine-6-sulfatase	GNS	N-acetylglucosamine-6-sulfatase	1	10	10	10	1	1	2	3	3	2	3	3	3	4	3	4	4	3	2	5	4	4	6	5	3	6	6	4	2	0	0	0	0	0	0	1	0	0	0	0	3	4
P15880	P15880	14	14	14	40S ribosomal protein S2	RPS2	40S ribosomal protein S2	1	14	14	14	8	12	7	7	8	4	9	10	8	6	10	4	12	11	11	12	13	12	11	12	13	11	12	11	14	12	12	11	12	11	12	13	9	11	11	11	8	4
P15924	P15924	50	50	50	Desmoplakin	DSP	Desmoplakin	1	50	50	50	29	11	10	35	11	21	15	13	23	15	12	36	18	13	10	14	11	9	13	14	8	15	16	25	17	11	17	15	12	14	18	12	17	12	23	15	16	6
P15941	P15941	7	7	7	Mucin-1;Mucin-1 subunit alpha;Mucin-1 subunit beta	MUC1	Mucin-1	1	7	7	7	1	0	0	0	0	0	0	0	0	0	0	0	3	1	2	3	3	3	3	3	3	3	3	1	6	6	6	6	6	6	6	6	5	6	6	6	4	5
P16070	P16070	10	10	10	CD44 antigen	CD44	CD44 antigen	1	10	10	10	7	5	7	4	4	6	5	5	7	5	5	5	5	4	4	5	4	6	5	3	4	6	4	3	8	8	9	9	9	8	9	8	8	9	8	8	6	7
P16104	P16104	10	4	2	Histone H2AX	H2AFX	Histone H2AX	1	10	4	2	9	9	9	8	7	8	8	9	9	8	9	6	9	9	7	9	7	8	9	8	8	9	8	8	6	7	6	7	5	7	7	5	6	6	6	6	3	2
P16144	P16144	59	59	59	Integrin beta-4	ITGB4	Integrin beta-4	1	59	59	59	0	0	1	0	0	0	1	1	1	1	1	0	2	0	1	3	1	0	1	1	1	3	2	1	44	53	50	49	52	51	52	50	51	47	49	49	26	26
P16152;O75828	P16152	9;2	9;2	9;2	Carbonyl reductase [NADPH] 1	CBR1	Carbonyl reductase [NADPH] 1	2	9	9	9	5	7	6	4	4	6	7	5	6	6	6	6	2	3	3	2	1	2	2	2	2	2	3	3	2	2	5	5	2	4	4	2	3	1	5	2	1	2
P16278	P16278	3	3	3	Beta-galactosidase	GLB1	Beta-galactosidase	1	3	3	3	0	0	0	0	0	0	1	0	1	0	0	0	0	0	0	1	1	0	1	0	1	1	0	0	0	0	1	0	1	0	1	0	0	0	1	0	1	1
P16422	P16422	12	12	12	Epithelial cell adhesion molecule	EPCAM	Epithelial cell adhesion molecule	1	12	12	12	0	0	1	0	0	0	0	0	1	0	2	2	12	11	11	10	11	10	10	10	10	12	10	9	8	10	6	8	8	7	7	7	8	7	7	8	4	5
P16435	P16435	14	14	14	NADPH--cytochrome P450 reductase	POR	NADPH--cytochrome P450 reductase	1	14	14	14	1	3	1	0	0	1	3	1	2	3	0	2	11	7	6	12	13	9	8	8	10	12	10	4	4	4	6	5	3	5	2	6	3	4	3	3	2	2
P16615	P16615	29	29	18	Sarcoplasmic/endoplasmic reticulum calcium ATPase 2	ATP2A2	Sarcoplasmic/endoplasmic reticulum calcium ATPase 2	1	29	29	18	3	9	6	2	8	6	14	12	11	8	11	7	18	18	15	21	20	19	16	14	21	19	17	15	17	14	15	14	14	17	9	17	10	20	14	13	17	18
P16930	P16930	2	2	2	Fumarylacetoacetase	FAH	Fumarylacetoacetase	1	2	2	2	0	0	0	0	0	1	1	2	1	1	1	1	0	0	0	0	0	0	1	0	0	0	0	0	2	2	2	2	2	2	2	2	2	1	2	2	0	0
P16949	P16949	8	8	7	Stathmin	STMN1	Stathmin	1	8	8	7	4	3	3	3	3	3	3	4	3	3	3	4	0	0	0	0	0	0	0	0	0	0	0	0	0	0	0	0	0	0	0	0	0	0	0	0	0	0
P17066;P48741	P17066;P48741	11;6	1;1	1;1	Heat shock 70 kDa protein 6;Putative heat shock 70 kDa protein 7	HSPA6;HSPA7	Heat shock 70 kDa protein 6;Putative heat shock 70 kDa protein 7	2	11	1	1	10	10	10	10	9	9	10	10	10	10	9	11	9	8	8	9	9	9	9	9	9	8	8	8	9	9	9	9	8	8	9	9	9	9	8	8	7	7
P17174	P17174	11	11	11	Aspartate aminotransferase, cytoplasmic	GOT1	Aspartate aminotransferase, cytoplasmic	1	11	11	11	6	6	6	4	7	8	6	7	6	6	6	8	1	1	1	2	1	1	2	1	1	1	1	0	1	2	0	2	3	2	0	2	0	2	0	3	1	1
P17252	P17252	6	2	2	Protein kinase C alpha type	PRKCA	Protein kinase C alpha type	1	6	2	2	4	3	5	3	4	4	4	4	3	4	6	4	0	0	0	0	0	0	0	0	0	0	0	0	0	0	0	0	0	0	0	0	0	0	0	0	0	1
P17301	P17301	32	32	32	Integrin alpha-2	ITGA2	Integrin alpha-2	1	32	32	32	12	13	19	11	11	15	19	17	16	16	15	16	21	18	22	24	23	25	20	22	20	25	23	22	26	27	28	23	27	27	26	22	24	27	26	23	18	21
P17302	P17302	11	11	11	Gap junction alpha-1 protein	GJA1	Gap junction alpha-1 protein	1	11	11	11	11	10	10	9	8	10	10	10	11	10	10	11	0	0	0	0	0	0	0	0	0	0	0	0	0	0	0	0	0	0	0	0	0	0	0	0	0	0
P17480	P17480	2	2	2	Nucleolar transcription factor 1	UBTF	Nucleolar transcription factor 1	1	2	2	2	0	1	0	0	0	0	0	0	0	0	0	0	1	1	1	2	0	1	0	1	1	1	0	1	0	0	0	0	0	0	0	0	0	0	0	0	0	0
P17612	P17612	1	1	1	cAMP-dependent protein kinase catalytic subunit alpha	PRKACA	cAMP-dependent protein kinase catalytic subunit alpha	1	1	1	1	0	0	1	0	0	0	0	0	0	0	0	0	1	0	0	1	1	1	0	1	1	0	1	0	0	0	0	0	0	0	0	0	0	0	0	0	0	0
P17655	P17655	9	9	9	Calpain-2 catalytic subunit	CAPN2	Calpain-2 catalytic subunit	1	9	9	9	2	5	2	1	0	2	2	5	3	3	3	2	0	0	0	0	0	0	1	0	0	1	0	0	5	5	5	6	7	7	7	6	6	6	6	6	3	4
P17693	P17693	3	2	2	HLA class I histocompatibility antigen, alpha chain G	HLA-G	HLA class I histocompatibility antigen, alpha chain G	1	3	2	2	3	3	3	3	3	3	3	3	3	3	3	2	1	1	1	1	1	1	1	2	1	1	1	1	1	1	1	1	2	1	1	1	1	2	1	1	1	1
P17812;Q9NRF8	P17812	10;1	10;1	10;1	CTP synthase 1	CTPS1	CTP synthase 1	2	10	10	10	4	4	3	0	0	3	4	4	5	2	4	3	1	2	2	1	2	2	2	1	3	1	2	2	3	1	4	3	2	3	4	5	3	0	4	4	0	0
P17844	P17844	6	3	3	Probable ATP-dependent RNA helicase DDX5	DDX5	Probable ATP-dependent RNA helicase DDX5	1	6	3	3	3	3	3	0	2	1	4	4	4	4	3	3	5	5	5	5	5	6	6	6	6	4	5	5	4	6	3	4	2	5	5	4	4	2	4	3	1	1
P17858	P17858	13	11	11	ATP-dependent 6-phosphofructokinase, liver type	PFKL	ATP-dependent 6-phosphofructokinase, liver type	1	13	11	11	3	3	2	0	2	3	3	5	4	4	2	4	10	5	8	11	9	7	8	10	6	6	8	6	2	2	3	3	2	3	2	4	2	1	3	2	2	2
P17900	P17900	2	2	2	Ganglioside GM2 activator;Ganglioside GM2 activator isoform short	GM2A	Ganglioside GM2 activator	1	2	2	2	0	1	0	0	0	0	1	0	0	0	0	0	1	0	2	2	1	1	1	1	1	0	1	1	0	0	0	0	1	0	0	0	0	0	0	0	2	2
P17931	P17931	4	4	4	Galectin-3	LGALS3	Galectin-3	1	4	4	4	0	0	0	0	0	0	0	0	0	0	0	0	0	0	0	0	0	0	0	1	0	0	0	0	3	4	3	3	3	4	2	3	3	3	2	3	1	2
P17980	P17980	12	12	12	26S protease regulatory subunit 6A	PSMC3	26S proteasome regulatory subunit 6A	1	12	12	12	5	7	5	2	1	4	7	6	6	4	7	4	5	6	6	4	6	4	3	3	5	5	4	4	11	7	7	8	8	7	10	9	7	5	9	8	1	3
P17987	P17987	30	30	30	T-complex protein 1 subunit alpha	TCP1	T-complex protein 1 subunit alpha	1	30	30	30	13	21	16	10	6	8	17	21	18	14	14	15	16	11	13	16	17	13	13	11	10	17	14	14	26	25	25	24	22	23	24	24	25	17	26	22	9	10
P18065	P18065	5	5	5	Insulin-like growth factor-binding protein 2	IGFBP2	Insulin-like growth factor-binding protein 2	1	5	5	5	2	1	0	2	2	0	1	0	1	2	2	2	3	2	2	2	1	2	0	1	1	2	2	1	0	0	0	0	0	0	0	0	0	0	0	0	0	0
P18077	P18077	3	3	3	60S ribosomal protein L35a	RPL35A	60S ribosomal protein L35a	1	3	3	3	1	1	1	0	1	1	0	1	1	1	2	1	3	3	3	3	3	3	3	3	3	3	3	3	3	2	3	3	3	3	3	3	3	2	3	3	3	3
P18084	P18084	23	23	23	Integrin beta-5	ITGB5	Integrin beta-5	1	23	23	23	15	17	20	14	18	22	19	20	21	21	21	20	13	10	13	16	12	13	11	12	13	14	12	12	1	3	3	2	2	3	2	1	1	5	5	9	1	1
P18085	P18085	11	6	6	ADP-ribosylation factor 4	ARF4	ADP-ribosylation factor 4	1	11	6	6	6	7	6	8	6	5	8	8	7	10	10	10	7	5	4	6	7	5	6	6	5	4	8	4	7	8	8	7	7	7	8	8	8	7	8	7	3	4
P18124	P18124	20	20	19	60S ribosomal protein L7	RPL7	60S ribosomal protein L7	1	20	20	19	9	12	8	4	6	5	9	11	5	7	8	7	17	17	18	19	19	18	17	18	18	19	18	18	14	12	10	9	10	12	11	15	11	10	13	12	6	6
P18206	P18206	35	35	35	Vinculin	VCL	Vinculin	1	35	35	35	28	29	31	27	27	27	30	27	28	29	30	29	10	9	12	12	12	8	11	13	8	15	13	12	14	14	10	13	9	10	9	10	13	13	13	14	7	11
P18433	P18433	7	7	7	Receptor-type tyrosine-protein phosphatase alpha	PTPRA	Receptor-type tyrosine-protein phosphatase alpha	1	7	7	7	2	4	5	2	2	2	3	3	3	4	4	5	1	2	1	1	1	0	1	1	1	2	1	2	0	0	1	0	0	1	0	0	1	1	1	1	0	1
P18564	P18564	11	11	11	Integrin beta-6	ITGB6	Integrin beta-6	1	11	11	11	1	1	1	1	1	1	1	1	1	1	1	1	1	1	1	1	1	1	1	1	1	1	1	1	4	7	7	7	6	6	6	3	5	10	5	8	6	6
P18583	P18583	3	3	3	Protein SON	SON	Protein SON	1	3	3	3	0	0	0	0	0	0	1	0	1	1	1	2	2	2	2	2	2	2	2	2	1	2	2	1	1	1	1	1	1	1	1	1	1	1	1	1	0	0
P18621	P18621	9	9	9	60S ribosomal protein L17	RPL17	60S ribosomal protein L17	1	9	9	9	4	5	3	3	2	3	3	4	4	2	3	3	8	7	7	7	7	7	7	7	7	8	8	6	7	5	3	4	3	3	3	5	2	3	4	3	1	2
P18669;P15259	P18669	13;4	13;4	9;2	Phosphoglycerate mutase 1	PGAM1	Phosphoglycerate mutase 1	2	13	13	9	13	12	11	11	11	11	12	11	12	11	12	12	6	8	8	7	9	6	6	5	7	10	8	7	9	9	9	8	11	8	8	11	9	10	10	9	7	7
P18754	P18754	2	2	2	Regulator of chromosome condensation	RCC1	Regulator of chromosome condensation	1	2	2	2	0	2	0	0	0	0	1	1	0	0	0	1	0	0	0	0	1	1	0	0	1	0	0	1	1	0	0	1	0	0	1	0	0	0	1	0	0	0
P18827	P18827	5	5	5	Syndecan-1	SDC1	Syndecan-1	1	5	5	5	0	1	0	0	0	0	0	1	0	0	0	0	1	1	1	1	1	1	1	1	1	2	1	1	5	4	4	5	5	5	5	5	5	4	5	5	2	3
P18859	P18859	4	4	4	ATP synthase-coupling factor 6, mitochondrial	ATP5J	ATP synthase-coupling factor 6, mitochondrial	1	4	4	4	0	0	0	0	0	0	0	0	0	0	1	0	0	0	0	0	0	0	0	0	1	0	0	0	0	0	0	0	0	0	0	0	0	0	0	0	3	3
P19022	P19022	9	9	7	Cadherin-2	CDH2	Cadherin-2	1	9	9	7	4	5	6	3	3	6	6	7	7	7	4	7	0	0	0	0	0	0	0	0	0	0	0	0	0	0	0	0	0	0	1	1	0	0	0	0	0	0
P19086	P19086	3	2	2	Guanine nucleotide-binding protein G(z) subunit alpha	GNAZ	Guanine nucleotide-binding protein G(z) subunit alpha	1	3	2	2	2	1	0	1	0	2	2	2	2	1	1	1	1	0	0	0	0	0	0	0	1	0	1	1	0	0	0	0	0	0	0	0	0	0	0	0	0	0
P19237	P19237	2	2	2	Troponin I, slow skeletal muscle	TNNI1	Troponin I, slow skeletal muscle	1	2	2	2	0	0	0	0	1	0	0	0	0	0	0	0	1	0	0	1	1	0	1	1	0	1	1	0	0	0	0	0	0	0	0	0	0	0	0	0	0	0
P19256	P19256	1	1	1	Lymphocyte function-associated antigen 3	CD58	Lymphocyte function-associated antigen 3	1	1	1	1	1	1	1	1	1	1	1	1	1	1	1	1	0	0	0	0	0	0	0	0	0	0	0	0	0	0	0	0	0	0	0	0	0	0	0	0	0	0
P19338	P19338	12	12	12	Nucleolin	NCL	Nucleolin	1	12	12	12	6	8	7	3	8	4	5	8	7	8	8	5	5	5	5	3	5	3	3	2	5	4	5	5	2	4	2	2	2	1	1	2	1	1	2	5	0	1
P19404	P19404	2	2	2	NADH dehydrogenase [ubiquinone] flavoprotein 2, mitochondrial	NDUFV2	NADH dehydrogenase [ubiquinone] flavoprotein 2, mitochondrial	1	2	2	2	0	0	0	0	0	0	0	0	0	0	0	0	0	0	0	0	0	0	0	0	0	0	0	0	0	0	0	0	0	0	0	0	0	0	0	0	2	2
P19525	P19525	1	1	1	Interferon-induced, double-stranded RNA-activated protein kinase	EIF2AK2	Interferon-induced, double-stranded RNA-activated protein kinase	1	1	1	1	0	0	0	0	0	0	0	0	0	0	0	0	1	1	1	1	1	1	1	1	1	1	1	1	0	0	0	0	0	1	0	0	0	0	0	0	0	0
P19623	P19623	3	3	3	Spermidine synthase	SRM	Spermidine synthase	1	3	3	3	2	3	2	0	2	1	2	3	3	2	0	2	1	0	1	1	0	1	1	2	1	1	1	1	1	1	2	2	1	0	1	1	0	1	1	1	2	2
P19784	P19784	4	3	3	Casein kinase II subunit alpha	CSNK2A2	Casein kinase II subunit alpha	1	4	3	3	2	2	1	1	1	2	1	2	1	1	2	1	3	3	2	3	3	2	3	3	2	4	3	3	2	2	1	0	1	0	1	2	0	1	1	0	0	1
P19823	P19823	13	3	3	Inter-alpha-trypsin inhibitor heavy chain H2	ITIH2	Inter-alpha-trypsin inhibitor heavy chain H2	1	13	3	3	7	7	5	7	7	6	7	6	8	6	8	5	8	7	6	7	7	5	7	7	5	8	9	7	9	10	9	10	10	10	10	9	9	9	11	10	4	3
P19827	P19827	5	2	2	Inter-alpha-trypsin inhibitor heavy chain H1	ITIH1	Inter-alpha-trypsin inhibitor heavy chain H1	1	5	2	2	3	3	2	2	2	1	3	3	3	3	4	1	1	2	1	0	2	1	2	1	2	2	2	2	4	5	5	4	5	5	3	5	5	5	5	5	2	2
P20020;Q16720;Q01814	P20020	26;7;6	26;7;6	15;0;0	Plasma membrane calcium-transporting ATPase 1	ATP2B1	Plasma membrane calcium-transporting ATPase 1	3	26	26	15	15	23	19	14	14	18	21	23	21	17	21	16	15	18	15	20	18	16	17	17	11	17	18	16	7	10	10	9	12	11	11	11	9	10	8	10	11	13
P20073	P20073	17	17	17	Annexin A7	ANXA7	Annexin A7	1	17	17	17	15	15	15	15	16	15	16	16	16	15	15	15	13	10	11	13	14	11	13	13	12	14	13	13	12	13	13	15	12	13	12	13	13	14	12	12	4	7
P20336	P20336	4	1	1	Ras-related protein Rab-3A	RAB3A	Ras-related protein Rab-3A	1	4	1	1	0	0	0	0	0	0	0	0	0	1	0	1	3	1	3	3	3	3	2	1	2	4	2	3	2	2	2	3	1	1	1	2	1	2	1	0	2	1
P20337	P20337	2	1	1	Ras-related protein Rab-3B	RAB3B	Ras-related protein Rab-3B	1	2	1	1	0	0	0	0	0	0	0	0	0	0	0	0	1	0	1	1	1	1	1	0	0	1	1	1	0	0	0	1	0	0	0	0	0	0	0	0	0	1
P20338	P20338	5	5	5	Ras-related protein Rab-4A	RAB4A	Ras-related protein Rab-4A	1	5	5	5	2	2	2	1	1	2	3	4	4	1	2	3	3	3	4	4	4	4	3	4	2	4	3	3	0	1	1	0	0	0	0	1	0	1	0	1	1	1
P20339	P20339	8	5	5	Ras-related protein Rab-5A	RAB5A	Ras-related protein Rab-5A	1	8	5	5	4	5	5	5	5	6	6	6	6	4	5	6	3	3	3	2	2	2	2	2	2	2	2	2	2	1	2	1	2	2	1	2	1	2	2	1	1	1
P20340;Q9NRW1;Q14964	P20340;Q9NRW1	3;3;1	3;3;1	3;3;1	Ras-related protein Rab-6A;Ras-related protein Rab-6B	RAB6A;RAB6B	Ras-related protein Rab-6A;Ras-related protein Rab-6B	3	3	3	3	1	1	1	2	1	1	2	1	1	2	1	1	2	2	1	2	2	1	2	2	2	1	1	2	1	1	2	1	2	1	1	1	1	1	1	2	1	1
P20618	P20618	12	12	12	Proteasome subunit beta type-1	PSMB1	Proteasome subunit beta type-1	1	12	12	12	8	6	7	6	6	6	7	7	8	7	9	9	4	4	4	3	7	4	5	5	2	3	3	4	8	9	9	11	9	10	8	9	11	6	10	10	2	2
P20645	P20645	9	9	9	Cation-dependent mannose-6-phosphate receptor	M6PR	Cation-dependent mannose-6-phosphate receptor	1	9	9	9	5	7	4	7	5	6	6	4	6	6	5	6	8	7	7	9	8	7	7	7	8	8	8	7	6	6	8	7	6	8	7	6	6	7	7	7	1	1
P20648	P20648	4	1	1	Potassium-transporting ATPase alpha chain 1	ATP4A	Potassium-transporting ATPase alpha chain 1	1	4	1	1	2	2	2	2	2	2	2	2	2	2	3	3	2	2	2	2	2	2	2	2	2	2	2	2	3	3	2	3	3	3	3	3	3	3	3	2	2	2
P20674	P20674	5	5	5	Cytochrome c oxidase subunit 5A, mitochondrial	COX5A	Cytochrome c oxidase subunit 5A, mitochondrial	1	5	5	5	0	0	0	0	0	0	0	0	1	0	0	1	1	1	0	1	0	0	0	0	0	1	0	0	0	0	0	0	0	0	1	1	0	1	0	0	5	5
P20742	P20742	8	2	2	Pregnancy zone protein	PZP	Pregnancy zone protein	1	8	2	2	7	7	6	5	6	6	4	4	4	6	4	5	5	4	5	5	5	4	4	4	5	5	5	6	6	6	7	6	6	6	7	6	6	5	5	5	2	2
P20908	P20908	2	2	2	Collagen alpha-1(V) chain	COL5A1	Collagen alpha-1(V) chain	1	2	2	2	1	1	1	1	1	1	1	1	0	0	0	0	0	1	0	1	0	0	0	0	1	0	0	0	0	0	0	0	0	0	0	0	0	0	0	0	0	0
P21266	P21266	7	7	6	Glutathione S-transferase Mu 3	GSTM3	Glutathione S-transferase Mu 3	1	7	7	6	4	4	5	4	4	5	4	4	4	4	5	4	2	1	3	2	4	3	2	2	2	4	3	5	0	0	0	0	0	0	0	0	0	0	0	0	0	0
P21281	P21281	2	2	2	V-type proton ATPase subunit B, brain isoform	ATP6V1B2	V-type proton ATPase subunit B, brain isoform	1	2	2	2	1	0	0	0	0	1	1	1	1	0	1	1	0	0	0	0	0	0	0	0	0	0	0	0	0	1	0	2	0	0	2	0	1	1	2	0	0	0
P21291	P21291	3	3	3	Cysteine and glycine-rich protein 1	CSRP1	Cysteine and glycine-rich protein 1	1	3	3	3	0	0	0	0	0	0	1	1	0	1	1	1	1	1	1	1	1	1	1	1	1	1	1	1	0	0	0	0	0	0	0	0	0	0	0	0	1	1
P21333	P21333	70	70	62	Filamin-A	FLNA	Filamin-A	1	70	70	62	51	51	49	35	42	43	48	51	50	47	48	46	25	23	22	27	23	19	23	25	19	29	22	24	32	29	29	39	36	28	34	27	28	21	34	33	23	23
P21397	P21397	5	5	5	Amine oxidase [flavin-containing] A	MAOA	Amine oxidase [flavin-containing] A	1	5	5	5	0	0	0	0	0	0	0	0	0	0	0	0	0	0	0	1	0	0	0	0	0	0	0	0	0	0	0	0	0	0	1	0	0	1	0	0	3	3
P21399	P21399	4	4	4	Cytoplasmic aconitate hydratase	ACO1	Cytoplasmic aconitate hydratase	1	4	4	4	3	3	3	1	1	2	4	3	2	4	4	3	3	3	3	3	4	3	3	3	4	3	3	3	0	0	0	0	0	0	0	0	1	0	0	0	0	1
P21439	P21439	1	1	1	Multidrug resistance protein 3	ABCB4	Phosphatidylcholine translocator ABCB4	1	1	1	1	1	1	1	1	1	1	1	1	1	1	1	1	1	1	1	1	1	1	1	1	1	1	1	1	0	0	0	0	0	0	0	0	0	0	0	0	0	0
P21589	P21589	20	20	20	5-nucleotidase	NT5E	5-nucleotidase	1	20	20	20	0	0	0	0	0	0	1	0	0	0	0	0	1	1	3	2	2	2	3	2	1	2	2	3	18	19	20	18	18	20	20	19	19	17	19	18	14	12
P21741	P21741	8	8	8	Midkine	MDK	Midkine	1	8	8	8	6	6	6	6	7	7	4	5	5	5	5	5	7	5	6	7	7	7	7	6	4	6	7	6	0	0	0	0	0	0	0	0	0	0	0	0	0	0
P21796	P21796	16	16	16	Voltage-dependent anion-selective channel protein 1	VDAC1	Voltage-dependent anion-selective channel protein 1	1	16	16	16	3	2	2	1	2	1	5	4	4	2	3	6	5	5	5	6	5	6	3	4	5	6	6	6	6	6	7	6	5	3	6	7	3	8	5	5	14	12
P21810	P21810	9	9	9	Biglycan	BGN	Biglycan	1	9	9	9	0	0	1	0	0	0	0	1	0	0	0	1	6	6	7	7	6	7	7	8	9	8	7	7	0	0	0	0	0	0	0	0	0	0	0	0	0	0
P21817	P21817	3	3	3	Ryanodine receptor 1	RYR1	Ryanodine receptor 1	1	3	3	3	1	0	1	1	1	1	1	2	1	2	1	1	2	2	2	2	2	2	2	2	2	2	2	2	2	2	2	2	2	2	2	2	2	1	2	2	0	2
P21912	P21912	4	4	4	Succinate dehydrogenase [ubiquinone] iron-sulfur subunit, mitochondrial	SDHB	Succinate dehydrogenase [ubiquinone] iron-sulfur subunit, mitochondrial	1	4	4	4	1	0	1	0	1	0	1	1	1	1	1	1	0	0	0	0	0	0	0	0	0	0	0	0	0	0	0	0	0	0	0	0	0	0	0	0	4	4
P21926	P21926	8	8	8	CD9 antigen	CD9	CD9 antigen	1	8	8	8	6	7	8	6	7	6	7	5	7	7	6	8	6	5	6	6	6	6	6	6	6	6	6	5	7	7	6	4	6	6	7	6	6	6	6	7	4	4
P21964	P21964	6	6	6	Catechol O-methyltransferase	COMT	Catechol O-methyltransferase	1	6	6	6	6	6	3	0	1	1	6	5	5	6	5	3	3	4	4	4	5	5	5	3	5	4	4	3	2	3	2	2	2	2	2	3	2	3	3	2	4	3
P22061	P22061	4	4	4	Protein-L-isoaspartate(D-aspartate) O-methyltransferase	PCMT1	Protein-L-isoaspartate(D-aspartate) O-methyltransferase	1	4	4	4	0	1	1	0	0	1	1	3	1	0	0	2	0	0	0	0	0	0	0	0	0	0	0	0	0	0	0	0	0	0	0	0	1	0	0	0	0	0
P22087	P22087	7	7	6	rRNA 2-O-methyltransferase fibrillarin	FBL	rRNA 2-O-methyltransferase fibrillarin	1	7	7	6	2	2	2	3	1	1	2	1	2	2	0	2	5	5	5	5	5	4	5	5	7	5	4	5	3	1	2	2	0	1	1	1	1	2	1	0	0	0
P22102	P22102	9	9	9	Trifunctional purine biosynthetic protein adenosine-3;Phosphoribosylamine--glycine ligase;Phosphoribosylformylglycinamidine cyclo-ligase;Phosphoribosylglycinamide formyltransferase	GART	Trifunctional purine biosynthetic protein adenosine-3	1	9	9	9	6	6	5	7	4	7	5	8	6	9	6	7	1	1	1	1	1	1	0	1	2	1	2	1	4	7	7	7	6	5	5	6	5	3	7	7	2	2
P22223	P22223	1	1	1	Cadherin-3	CDH3	Cadherin-3	1	1	1	1	0	0	0	0	0	0	0	0	0	0	1	0	0	0	0	0	1	0	0	0	0	0	0	1	0	1	1	1	1	1	1	0	1	0	1	1	0	0
P22234	P22234	22	22	22	Multifunctional protein ADE2;Phosphoribosylaminoimidazole-succinocarboxamide synthase;Phosphoribosylaminoimidazole carboxylase	PAICS	Multifunctional protein ADE2	1	22	22	22	13	10	13	8	11	12	14	13	15	15	14	12	6	3	6	8	8	6	4	5	6	8	9	6	11	8	9	9	11	10	12	9	8	9	11	11	8	7
P22307	P22307	5	5	5	Non-specific lipid-transfer protein	SCP2	Non-specific lipid-transfer protein	1	5	5	5	1	0	0	0	0	0	1	0	1	1	1	1	2	1	1	4	2	3	0	2	1	2	2	3	2	0	2	0	1	1	1	3	0	2	2	2	4	4
P22314	P22314	25	25	25	Ubiquitin-like modifier-activating enzyme 1	UBA1	Ubiquitin-like modifier-activating enzyme 1	1	25	25	25	21	22	21	18	19	18	22	23	20	21	22	22	6	6	3	6	8	6	8	7	6	7	8	3	17	17	19	18	17	16	20	19	17	15	21	18	2	3
P22352	P22352	6	6	6	Glutathione peroxidase 3	GPX3	Glutathione peroxidase 3	1	6	6	6	3	2	2	2	2	2	1	1	2	1	1	2	3	4	4	4	4	3	4	4	3	4	3	4	4	4	4	4	4	4	4	4	4	4	4	4	4	4
P22392	P22392	9	4	2	Nucleoside diphosphate kinase B	NME2	Nucleoside diphosphate kinase B	1	9	4	2	7	8	8	8	8	8	8	8	7	7	8	7	4	5	4	6	5	4	5	4	5	5	5	5	4	6	6	5	6	7	3	3	4	3	6	7	6	6
P22413	P22413	27	27	27	Ectonucleotide pyrophosphatase/phosphodiesterase family member 1;Alkaline phosphodiesterase I;Nucleotide pyrophosphatase	ENPP1	Ectonucleotide pyrophosphatase/phosphodiesterase family member 1	1	27	27	27	18	18	18	17	17	20	21	21	22	22	20	22	1	1	1	2	1	3	1	1	1	2	0	2	0	0	0	0	1	0	0	0	1	0	0	0	1	2
P22528;P35321	P22528;P35321	3;2	3;2	3;2	Cornifin-B;Cornifin-A	SPRR1B;SPRR1A	Cornifin-B;Cornifin-A	2	3	3	3	0	0	0	1	0	0	1	1	0	0	0	2	0	0	0	0	0	0	0	0	0	0	0	0	0	0	1	0	0	2	0	1	0	1	1	1	3	3
P22532;P35326;P35325;P22531;Q96RM1	P22532;P35326;P35325;P22531	4;3;3;3;1	4;3;3;3;1	2;1;1;1;0	Small proline-rich protein 2D;Small proline-rich protein 2A;Small proline-rich protein 2B;Small proline-rich protein 2E	SPRR2D;SPRR2A;SPRR2B;SPRR2E	Small proline-rich protein 2D;Small proline-rich protein 2A;Small proline-rich protein 2B;Small proline-rich protein 2E	5	4	4	2	2	0	0	1	1	2	2	2	0	2	0	1	2	1	0	0	0	0	0	0	0	1	2	1	0	1	0	0	1	1	0	2	0	0	2	1	3	2
P22695	P22695	11	11	11	Cytochrome b-c1 complex subunit 2, mitochondrial	UQCRC2	Cytochrome b-c1 complex subunit 2, mitochondrial	1	11	11	11	0	1	1	0	0	2	2	1	2	1	2	0	0	0	0	2	3	1	0	0	0	2	0	0	0	1	0	0	0	1	0	2	0	3	0	0	8	9
P22735	P22735	19	19	19	Protein-glutamine gamma-glutamyltransferase K	TGM1	Protein-glutamine gamma-glutamyltransferase K	1	19	19	19	1	0	0	2	1	2	0	0	0	2	1	5	0	0	1	0	0	0	0	0	0	1	0	0	11	9	9	10	13	12	12	10	7	15	9	9	9	15
P23229	P23229	42	42	42	Integrin alpha-6;Integrin alpha-6 heavy chain;Integrin alpha-6 light chain;Processed integrin alpha-6	ITGA6	Integrin alpha-6	1	42	42	42	23	23	27	26	27	27	25	31	26	24	25	24	3	5	4	7	7	5	5	5	4	8	5	5	30	35	37	35	38	37	30	29	30	35	31	31	15	22
P23246	P23246	2	2	2	Splicing factor, proline- and glutamine-rich	SFPQ	Splicing factor, proline- and glutamine-rich	1	2	2	2	2	1	1	0	0	0	1	1	1	0	1	0	0	0	0	0	0	0	0	0	0	0	1	0	0	1	1	0	1	1	0	0	0	1	1	0	0	0
P23284	P23284	14	14	14	Peptidyl-prolyl cis-trans isomerase B	PPIB	Peptidyl-prolyl cis-trans isomerase B	1	14	14	14	7	7	8	7	8	8	7	8	8	8	8	9	8	8	8	10	11	8	10	9	9	8	8	6	9	11	10	10	11	10	9	11	11	12	9	13	8	8
P23297	P23297	2	2	2	Protein S100-A1	S100A1	Protein S100-A1	1	2	2	2	2	2	2	2	2	2	2	2	2	2	2	2	0	0	0	0	1	0	0	0	0	0	0	0	0	0	0	0	0	0	0	0	0	0	0	0	0	0
P23368	P23368	7	7	7	NAD-dependent malic enzyme, mitochondrial	ME2	NAD-dependent malic enzyme, mitochondrial	1	7	7	7	0	0	0	0	0	0	0	0	0	0	0	0	0	0	0	0	0	0	0	0	0	0	0	0	0	0	0	0	0	0	0	0	0	0	0	0	4	3
P23381	P23381	5	5	5	Tryptophan--tRNA ligase, cytoplasmic;T1-TrpRS;T2-TrpRS	WARS	Tryptophan--tRNA ligase, cytoplasmic	1	5	5	5	2	2	0	1	1	0	4	4	3	1	4	1	1	0	2	2	1	0	1	2	1	1	0	1	2	0	1	2	2	1	2	1	1	0	2	3	0	0
P23396	P23396	16	16	16	40S ribosomal protein S3	RPS3	40S ribosomal protein S3	1	16	16	16	5	10	3	1	4	3	9	8	6	6	5	4	13	12	12	13	12	14	11	10	12	11	12	10	14	11	8	12	10	10	10	13	9	12	10	9	5	4
P23458	P23458	4	4	4	Tyrosine-protein kinase JAK1	JAK1	Tyrosine-protein kinase JAK1	1	4	4	4	4	3	4	1	0	3	3	4	3	2	4	4	1	1	2	1	1	1	1	1	1	1	2	1	0	0	0	0	0	1	0	0	0	0	0	0	0	0
P23470	P23470	3	3	3	Receptor-type tyrosine-protein phosphatase gamma	PTPRG	Receptor-type tyrosine-protein phosphatase gamma	1	3	3	3	0	2	2	0	0	2	1	2	1	1	1	3	0	0	0	0	0	0	0	0	0	0	0	0	0	0	0	0	0	0	0	0	1	1	0	0	0	0
P23526	P23526	15	15	15	Adenosylhomocysteinase	AHCY	Adenosylhomocysteinase	1	15	15	15	14	14	13	11	11	12	14	11	12	10	10	11	11	12	11	11	12	11	11	11	12	11	11	11	11	12	10	10	11	11	12	9	9	6	9	9	9	5
P23528	P23528	13	13	10	Cofilin-1	CFL1	Cofilin-1	1	13	13	10	11	12	12	12	10	12	11	12	12	12	13	11	7	7	5	7	8	7	7	6	6	6	7	7	8	10	8	10	9	9	9	7	7	9	11	6	4	5
P23634	P23634	21	10	10	Plasma membrane calcium-transporting ATPase 4	ATP2B4	Plasma membrane calcium-transporting ATPase 4	1	21	10	10	12	17	14	10	10	12	16	14	16	13	17	13	15	14	12	17	14	15	15	16	10	17	17	13	5	8	8	9	11	8	9	10	8	10	11	7	9	11
P23743	P23743	2	2	2	Diacylglycerol kinase alpha	DGKA	Diacylglycerol kinase alpha	1	2	2	2	0	0	0	0	0	0	0	0	0	0	0	0	0	0	0	0	0	0	0	0	0	0	1	0	0	0	0	0	1	1	0	0	0	0	0	0	0	0
P23771	P23771	2	2	2	Trans-acting T-cell-specific transcription factor GATA-3	GATA3	Trans-acting T-cell-specific transcription factor GATA-3	1	2	2	2	0	0	0	0	0	0	0	0	0	0	0	0	2	1	2	2	2	1	1	2	1	2	2	1	0	0	0	0	0	0	0	0	0	0	0	0	0	0
P23786	P23786	3	3	3	Carnitine O-palmitoyltransferase 2, mitochondrial	CPT2	Carnitine O-palmitoyltransferase 2, mitochondrial	1	3	3	3	0	0	0	0	0	0	0	0	0	0	1	0	0	0	0	0	0	0	0	0	0	0	0	0	0	0	0	0	0	0	0	0	0	0	0	0	2	1
P23921	P23921	2	2	2	Ribonucleoside-diphosphate reductase large subunit	RRM1	Ribonucleoside-diphosphate reductase large subunit	1	2	2	2	1	1	1	0	0	0	1	2	1	1	1	0	0	0	0	1	0	0	0	0	0	0	0	0	2	0	0	1	0	1	0	1	0	0	1	1	0	0
P24043	P24043	2	2	2	Laminin subunit alpha-2	LAMA2	Laminin subunit alpha-2	1	2	2	2	0	0	0	0	1	0	0	0	0	0	0	0	1	1	2	2	2	2	2	1	1	2	1	2	0	0	0	0	0	1	0	0	0	0	0	0	1	1
P24390	P24390	3	3	3	ER lumen protein-retaining receptor 1	KDELR1	ER lumen protein-retaining receptor 1	1	3	3	3	1	2	1	1	1	0	2	1	2	1	1	1	3	2	3	3	3	3	2	3	3	3	3	2	2	1	1	1	2	1	1	0	1	1	2	2	0	1
P24534	P24534	4	4	4	Elongation factor 1-beta	EEF1B2	Elongation factor 1-beta	1	4	4	4	4	4	4	3	3	4	4	4	3	3	4	4	0	1	1	1	1	1	0	0	1	1	0	0	0	1	0	0	1	0	0	1	1	0	0	1	0	1
P24539	P24539	7	7	7	ATP synthase F(0) complex subunit B1, mitochondrial	ATP5F1	ATP synthase F(0) complex subunit B1, mitochondrial	1	7	7	7	0	0	0	0	0	0	0	2	0	0	0	0	1	1	1	3	2	1	0	0	1	1	1	1	0	0	0	0	0	0	0	0	0	1	0	0	4	6
P24666	P24666	4	4	4	Low molecular weight phosphotyrosine protein phosphatase	ACP1	Low molecular weight phosphotyrosine protein phosphatase	1	4	4	4	1	3	3	2	2	2	4	3	3	4	2	3	0	0	0	0	0	1	1	1	0	1	0	0	0	0	0	0	0	0	1	0	0	0	0	0	1	0
P24752	P24752	11	11	11	Acetyl-CoA acetyltransferase, mitochondrial	ACAT1	Acetyl-CoA acetyltransferase, mitochondrial	1	11	11	11	0	0	0	0	0	0	0	1	0	1	0	1	0	0	0	0	1	0	0	0	0	0	0	0	1	0	0	0	0	0	0	0	0	0	0	0	9	8
P24928	P24928	4	4	4	DNA-directed RNA polymerase II subunit RPB1	POLR2A	DNA-directed RNA polymerase II subunit RPB1	1	4	4	4	0	0	0	0	0	0	0	0	0	0	0	0	3	2	2	2	3	2	1	1	4	4	2	2	0	0	0	0	0	0	0	0	0	0	0	0	0	1
P25106	P25106	2	2	2	Atypical chemokine receptor 3	ACKR3	Atypical chemokine receptor 3	1	2	2	2	0	0	0	0	0	0	0	0	0	0	0	0	2	2	1	2	2	2	2	2	2	2	2	2	0	0	0	0	0	0	0	0	0	0	0	0	0	0
P25205	P25205	10	10	10	DNA replication licensing factor MCM3	MCM3	DNA replication licensing factor MCM3	1	10	10	10	0	2	0	0	0	0	3	3	2	1	2	0	4	4	2	2	3	4	4	3	7	3	2	4	2	1	0	2	1	1	2	1	0	0	0	0	1	0
P25311	P25311	5	5	5	Zinc-alpha-2-glycoprotein	AZGP1	Zinc-alpha-2-glycoprotein	1	5	5	5	1	2	1	3	2	1	2	2	2	3	3	2	1	1	1	1	1	0	1	1	1	1	1	2	0	0	0	0	0	0	0	0	0	1	0	0	0	0
P25325	P25325	1	1	1	3-mercaptopyruvate sulfurtransferase	MPST	3-mercaptopyruvate sulfurtransferase	1	1	1	1	0	0	0	0	0	0	0	0	0	0	0	0	0	0	0	0	0	0	0	0	0	0	0	0	0	0	0	0	0	0	0	0	0	0	0	0	1	1
P25391	P25391	9	9	9	Laminin subunit alpha-1	LAMA1	Laminin subunit alpha-1	1	9	9	9	3	8	3	1	1	1	3	3	0	1	1	1	2	1	1	1	1	1	1	1	1	1	1	1	0	0	0	0	0	0	0	0	0	0	0	0	0	0
P25398	P25398	4	4	4	40S ribosomal protein S12	RPS12	40S ribosomal protein S12	1	4	4	4	2	2	1	3	2	2	2	3	2	2	1	1	1	2	2	2	2	1	1	1	0	1	1	1	2	1	1	0	0	1	1	1	0	0	0	2	0	1
P25445	P25445	5	5	5	Tumor necrosis factor receptor superfamily member 6	FAS	Tumor necrosis factor receptor superfamily member 6	1	5	5	5	2	3	3	1	2	3	3	2	3	3	2	3	0	0	0	0	0	0	0	0	0	0	0	1	3	3	3	3	3	3	2	4	3	3	2	3	3	3
P25685	P25685	4	3	3	DnaJ homolog subfamily B member 1	DNAJB1	DnaJ homolog subfamily B member 1	1	4	3	3	3	3	2	1	0	2	3	3	1	3	3	2	1	1	2	1	0	1	1	1	1	2	1	1	0	1	0	0	0	0	0	0	0	0	0	0	0	1
P25705	P25705	22	22	22	ATP synthase subunit alpha, mitochondrial	ATP5A1	ATP synthase subunit alpha, mitochondrial	1	22	22	22	0	2	0	0	1	1	2	0	1	0	0	1	2	0	2	3	2	3	1	1	2	1	1	2	1	0	0	1	0	1	0	2	2	6	1	1	17	18
P25786	P25786	13	13	13	Proteasome subunit alpha type-1	PSMA1	Proteasome subunit alpha type-1	1	13	13	13	6	7	6	4	7	4	8	11	9	6	9	8	8	6	7	9	6	5	5	6	7	7	8	8	9	10	7	8	7	6	7	5	7	5	7	7	2	2
P25787	P25787	9	9	9	Proteasome subunit alpha type-2	PSMA2	Proteasome subunit alpha type-2	1	9	9	9	5	6	7	5	4	8	6	7	6	6	6	6	8	6	6	5	8	7	8	8	8	8	7	5	7	8	6	7	6	9	6	6	8	4	9	8	0	0
P25788	P25788	9	9	9	Proteasome subunit alpha type-3	PSMA3	Proteasome subunit alpha type-3	1	9	9	9	6	6	5	4	5	6	7	7	4	6	7	4	3	3	4	3	6	4	5	7	2	4	3	3	7	6	6	7	5	5	5	7	7	2	7	7	2	1
P25789	P25789	12	12	12	Proteasome subunit alpha type-4	PSMA4	Proteasome subunit alpha type-4	1	12	12	12	10	7	9	7	9	7	10	8	8	5	9	7	5	3	4	9	8	6	8	8	4	8	7	4	9	10	8	9	9	11	10	11	7	6	8	8	2	2
P25815	P25815	3	3	3	Protein S100-P	S100P	Protein S100-P	1	3	3	3	0	0	0	0	0	0	0	0	0	0	0	0	0	0	0	0	0	0	0	0	0	0	0	0	2	2	1	1	1	1	2	1	1	1	1	2	1	1
P25929	P25929	5	5	5	Neuropeptide Y receptor type 1	NPY1R	Neuropeptide Y receptor type 1	1	5	5	5	0	0	0	0	0	0	0	0	0	0	0	0	4	4	4	4	4	4	3	4	3	4	3	2	0	0	0	0	0	0	1	0	0	0	0	0	0	0
P25940	P25940	3	3	3	Collagen alpha-3(V) chain	COL5A3	Collagen alpha-3(V) chain	1	3	3	3	0	1	0	0	0	0	0	0	0	0	1	0	0	1	0	1	1	0	0	0	0	0	0	0	0	0	0	0	1	0	1	0	0	1	0	0	0	0
P26006	P26006	27	27	27	Integrin alpha-3;Integrin alpha-3 heavy chain;Integrin alpha-3 light chain	ITGA3	Integrin alpha-3	1	27	27	27	3	5	8	2	3	6	8	5	6	6	9	8	9	7	7	10	11	7	7	7	8	9	9	5	20	22	21	22	26	22	21	20	21	24	22	22	13	14
P26038	P26038	41	41	31	Moesin	MSN	Moesin	1	41	41	31	31	31	32	30	26	30	33	32	31	29	30	31	12	12	11	13	12	11	11	11	11	12	9	10	22	26	27	21	24	30	21	18	20	25	20	26	21	25
P26232	P26232	6	1	1	Catenin alpha-2	CTNNA2	Catenin alpha-2	1	6	1	1	6	6	6	6	5	6	6	5	6	5	6	6	5	3	3	4	4	3	3	3	4	4	5	4	3	3	4	3	4	5	3	3	2	3	3	2	0	1
P26358	P26358	6	6	6	DNA (cytosine-5)-methyltransferase 1	DNMT1	DNA (cytosine-5)-methyltransferase 1	1	6	6	6	0	2	1	0	0	1	2	1	1	1	0	0	2	2	2	4	3	2	2	3	6	3	4	4	1	0	1	0	1	0	0	0	0	1	0	0	1	1
P26373	P26373	7	7	7	60S ribosomal protein L13	RPL13	60S ribosomal protein L13	1	7	7	7	4	4	4	3	3	3	4	5	5	4	2	3	6	6	6	6	6	5	5	5	5	5	6	5	6	4	3	3	3	3	3	3	4	4	3	4	4	4
P26572	P26572	3	3	3	Alpha-1,3-mannosyl-glycoprotein 2-beta-N-acetylglucosaminyltransferase	MGAT1	Alpha-1,3-mannosyl-glycoprotein 2-beta-N-acetylglucosaminyltransferase	1	3	3	3	0	0	0	0	0	0	0	0	0	0	0	0	2	2	3	3	3	2	3	2	3	2	3	1	0	0	0	0	1	0	0	1	1	0	0	0	0	0
P26639;A2RTX5	P26639	10;1	10;1	10;1	Threonine--tRNA ligase, cytoplasmic	TARS	Threonine--tRNA ligase 1, cytoplasmic	2	10	10	10	8	5	6	2	3	4	7	5	8	5	6	7	3	1	3	2	3	2	2	2	2	3	2	1	5	5	7	7	5	6	7	7	3	3	8	6	3	4
P26640	P26640	13	13	13	Valine--tRNA ligase	VARS	Valine--tRNA ligase	1	13	13	13	0	1	1	1	1	1	2	3	2	1	1	0	3	2	2	5	3	2	3	3	4	3	3	3	9	6	8	10	6	9	10	8	6	1	6	6	0	1
P26641	P26641	17	17	17	Elongation factor 1-gamma	EEF1G	Elongation factor 1-gamma	1	17	17	17	11	11	12	6	8	9	12	10	12	7	12	10	11	8	8	12	11	8	9	10	10	9	11	8	9	11	12	12	10	12	12	12	11	9	13	14	3	3
P26885	P26885	5	5	5	Peptidyl-prolyl cis-trans isomerase FKBP2	FKBP2	Peptidyl-prolyl cis-trans isomerase FKBP2	1	5	5	5	2	1	2	0	2	1	2	2	2	0	1	2	3	2	4	4	4	3	2	1	2	4	2	3	2	1	3	3	3	3	2	3	2	4	2	2	3	4
P27105	P27105	15	15	15	Erythrocyte band 7 integral membrane protein	STOM	Erythrocyte band 7 integral membrane protein	1	15	15	15	10	10	12	12	11	12	12	11	12	12	12	12	9	9	8	9	11	10	9	10	8	11	11	8	13	13	12	12	13	12	11	13	13	13	12	12	10	10
P27169	P27169	2	2	2	Serum paraoxonase/arylesterase 1	PON1	Serum paraoxonase/arylesterase 1	1	2	2	2	0	0	0	0	0	0	0	0	0	0	0	0	0	0	0	0	0	0	0	0	0	0	0	0	2	2	2	2	2	2	2	2	2	2	2	2	0	0
P27348	P27348	18	14	14	14-3-3 protein theta	YWHAQ	14-3-3 protein theta	1	18	14	14	17	17	17	17	16	18	17	17	17	16	17	18	12	9	8	10	10	7	6	8	9	11	8	8	9	11	9	12	9	10	12	9	11	8	11	13	5	4
P27635;Q96L21	P27635	9;2	9;2	9;2	60S ribosomal protein L10	RPL10	60S ribosomal protein L10	2	9	9	9	1	2	2	1	4	3	3	3	4	3	4	4	9	8	8	8	9	7	6	6	8	6	9	7	8	7	6	7	5	7	6	7	6	7	6	7	4	5
P27701	P27701	6	6	6	CD82 antigen	CD82	CD82 antigen	1	6	6	6	5	4	5	5	5	5	5	5	5	5	5	5	4	4	3	2	3	2	4	3	2	4	4	4	5	6	6	6	6	6	6	6	5	6	6	6	4	4
P27708	P27708	22	22	22	CAD protein;Glutamine-dependent carbamoyl-phosphate synthase;Aspartate carbamoyltransferase;Dihydroorotase	CAD	CAD protein	1	22	22	22	4	9	7	1	0	4	9	6	9	6	8	7	6	10	11	11	11	8	10	11	9	10	12	7	10	14	14	15	12	12	14	14	12	9	15	14	1	0
P27797	P27797	23	23	23	Calreticulin	CALR	Calreticulin	1	23	23	23	13	12	15	14	15	14	15	15	15	13	14	13	19	18	18	19	20	19	18	19	16	17	18	18	18	17	19	18	19	17	18	18	18	21	17	17	19	17
P27824;O14967	P27824	34;1	34;1	34;1	Calnexin	CANX	Calnexin	2	34	34	34	20	22	25	23	20	23	24	19	23	17	20	23	28	30	27	30	29	30	27	27	30	30	29	29	26	25	25	25	26	25	25	27	24	27	24	25	24	26
P28062	P28062	3	3	3	Proteasome subunit beta type-8	PSMB8	Proteasome subunit beta type-8	1	3	3	3	0	0	0	0	0	0	0	0	0	0	0	0	0	0	0	0	0	0	0	0	0	0	0	0	2	3	2	3	3	3	3	2	3	1	2	2	1	0
P28066	P28066	9	9	9	Proteasome subunit alpha type-5	PSMA5	Proteasome subunit alpha type-5	1	9	9	9	8	9	8	6	8	7	9	9	8	8	8	7	7	7	7	7	7	7	6	6	7	7	7	7	8	7	7	8	9	8	7	7	7	6	7	5	4	4
P28070	P28070	5	5	5	Proteasome subunit beta type-4	PSMB4	Proteasome subunit beta type-4	1	5	5	5	3	5	4	3	3	4	5	4	4	4	4	5	1	1	1	1	1	1	1	1	2	0	1	1	5	4	2	3	4	3	4	4	4	0	3	2	0	0
P28072	P28072	5	5	5	Proteasome subunit beta type-6	PSMB6	Proteasome subunit beta type-6	1	5	5	5	4	3	3	2	3	4	3	4	4	3	5	4	0	1	1	0	0	1	2	0	0	1	0	0	5	4	4	4	3	4	3	4	3	2	4	4	3	2
P28074	P28074	10	10	10	Proteasome subunit beta type-5	PSMB5	Proteasome subunit beta type-5	1	10	10	10	9	9	8	6	6	7	8	7	7	5	10	7	4	3	4	5	5	4	5	6	5	5	6	4	5	6	5	6	7	8	6	5	7	3	6	6	1	1
P28161;Q03013;P46439	P28161	4;1;1	3;1;0	2;0;0	Glutathione S-transferase Mu 2	GSTM2	Glutathione S-transferase Mu 2	3	4	3	2	3	3	4	3	4	4	4	4	3	4	4	3	1	1	1	2	2	2	2	3	2	2	2	2	0	0	0	0	0	0	0	0	0	0	0	0	0	0
P28288	P28288	6	6	6	ATP-binding cassette sub-family D member 3	ABCD3	ATP-binding cassette sub-family D member 3	1	6	6	6	1	0	0	0	0	0	2	2	1	0	0	0	4	1	2	2	2	1	1	1	1	1	2	1	2	1	1	1	1	1	2	2	1	1	2	2	6	6
P28331	P28331	7	7	7	NADH-ubiquinone oxidoreductase 75 kDa subunit, mitochondrial	NDUFS1	NADH-ubiquinone oxidoreductase 75 kDa subunit, mitochondrial	1	7	7	7	0	0	0	0	0	0	0	0	0	0	0	0	0	0	0	0	0	0	0	0	0	0	0	0	0	0	0	1	1	0	1	0	0	0	0	0	6	3
P28482;P27361	P28482;P27361	2;1	2;1	2;1	Mitogen-activated protein kinase 1;Mitogen-activated protein kinase 3	MAPK1;MAPK3	Mitogen-activated protein kinase 1;Mitogen-activated protein kinase 3	2	2	2	2	0	1	2	0	0	1	2	2	0	1	1	0	1	0	0	0	1	1	1	1	1	1	0	0	1	0	1	0	0	0	0	1	0	0	0	0	0	0
P28676	P28676	3	3	3	Grancalcin	GCA	Grancalcin	1	3	3	3	3	3	3	3	3	3	2	3	2	2	3	2	1	1	1	2	3	1	2	2	1	2	1	1	0	0	0	0	0	0	0	0	0	0	0	0	0	0
P28799	P28799	2	2	2	Granulins;Acrogranin;Paragranulin;Granulin-1;Granulin-2;Granulin-3;Granulin-4;Granulin-5;Granulin-6;Granulin-7	GRN	Progranulin	1	2	2	2	0	1	0	0	0	0	0	1	0	0	1	2	0	0	0	1	0	0	0	0	0	1	0	0	0	0	1	0	0	0	0	0	0	0	0	0	1	2
P28838	P28838	10	10	10	Cytosol aminopeptidase	LAP3	Cytosol aminopeptidase	1	10	10	10	3	4	5	2	3	5	4	3	4	3	5	4	1	2	1	4	3	3	2	4	2	3	2	3	0	1	1	0	1	1	0	0	0	0	1	0	1	1
P29033	P29033	1	1	1	Gap junction beta-2 protein	GJB2	Gap junction beta-2 protein	1	1	1	1	0	0	0	0	0	0	0	0	0	0	0	0	0	0	1	0	1	1	1	1	0	0	0	0	1	0	0	1	0	0	0	1	0	1	0	0	0	0
P29034	P29034	4	4	4	Protein S100-A2	S100A2	Protein S100-A2	1	4	4	4	0	0	0	0	0	0	0	0	0	0	0	0	0	0	0	0	0	1	0	0	0	0	0	1	3	3	3	4	3	4	4	4	4	4	4	3	4	4
P29144	P29144	6	6	6	Tripeptidyl-peptidase 2	TPP2	Tripeptidyl-peptidase 2	1	6	6	6	1	1	0	1	0	0	2	3	0	1	2	1	4	1	3	4	5	3	4	3	3	5	4	1	0	2	1	3	1	2	3	1	1	1	3	1	0	0
P29218	P29218	2	2	2	Inositol monophosphatase 1	IMPA1	Inositol monophosphatase 1	1	2	2	2	0	0	0	0	0	0	0	0	0	0	0	0	0	0	0	0	0	0	0	0	0	0	0	0	0	0	0	0	0	0	0	0	0	0	0	0	0	0
P29317	P29317	15	15	13	Ephrin type-A receptor 2	EPHA2	Ephrin type-A receptor 2	1	15	15	13	6	10	12	2	4	5	11	10	8	11	12	10	1	2	3	2	3	3	2	1	3	3	1	3	3	8	10	11	8	8	9	6	8	9	8	8	2	3
P29323;P54762	P29323	9;4	7;2	6;2	Ephrin type-B receptor 2	EPHB2	Ephrin type-B receptor 2	2	9	7	6	4	4	3	2	3	4	5	5	3	5	5	5	1	1	2	2	2	2	1	1	1	2	1	2	1	2	2	2	2	2	2	2	2	2	1	1	1	3
P29373	P29373	2	2	2	Cellular retinoic acid-binding protein 2	CRABP2	Cellular retinoic acid-binding protein 2	1	2	2	2	0	0	0	0	0	0	0	0	0	0	1	0	2	1	1	2	2	2	0	1	0	2	2	1	0	1	1	0	0	0	1	0	1	0	1	0	2	2
P29401	P29401	7	7	7	Transketolase	TKT	Transketolase	1	7	7	7	5	5	4	4	3	6	4	5	6	4	6	4	2	0	2	3	2	2	1	0	2	3	0	1	3	3	3	4	3	1	2	2	5	2	5	4	2	2
P29692	P29692	5	5	5	Elongation factor 1-delta	EEF1D	Elongation factor 1-delta	1	5	5	5	4	4	3	3	3	3	4	4	4	4	4	4	1	1	0	0	0	0	0	1	0	1	0	0	0	1	1	0	1	1	0	0	0	0	1	0	2	1
P29966	P29966	14	14	13	Myristoylated alanine-rich C-kinase substrate	MARCKS	Myristoylated alanine-rich C-kinase substrate	1	14	14	13	13	12	12	13	12	13	14	13	13	11	13	13	0	0	0	0	0	0	0	0	0	0	0	0	2	3	5	5	6	4	5	4	4	7	5	7	4	3
P29972	P29972	1	1	1	Aquaporin-1	AQP1	Aquaporin-1	1	1	1	1	0	0	0	0	0	0	0	0	0	0	0	0	1	1	1	1	1	1	1	1	1	1	1	1	0	0	0	0	0	0	0	0	0	0	0	0	0	0
P29992;O95837	P29992	16;6	8;3	8;3	Guanine nucleotide-binding protein subunit alpha-11	GNA11	Guanine nucleotide-binding protein subunit alpha-11	2	16	8	8	13	11	6	7	7	9	15	12	13	11	13	11	6	5	6	9	9	6	7	5	8	10	7	5	5	8	7	9	6	7	5	8	7	9	8	7	5	8
P30040	P30040	10	10	10	Endoplasmic reticulum resident protein 29	ERP29	Endoplasmic reticulum resident protein 29	1	10	10	10	5	7	7	6	4	4	6	6	6	5	7	6	8	9	9	10	9	10	7	9	8	9	10	9	9	8	8	10	10	9	10	10	9	9	10	10	9	8
P30041	P30041	11	11	11	Peroxiredoxin-6	PRDX6	Peroxiredoxin-6	1	11	11	11	6	8	8	6	6	7	7	8	10	6	6	7	5	4	5	4	4	4	4	3	3	5	4	4	7	6	7	7	7	8	6	6	6	6	6	6	7	7
P30043	P30043	2	2	2	Flavin reductase (NADPH)	BLVRB	Flavin reductase (NADPH)	1	2	2	2	1	1	1	1	1	1	1	1	1	1	1	1	2	1	0	1	1	1	1	1	1	1	1	0	0	0	0	0	0	0	0	0	0	0	0	0	0	0
P30044	P30044	5	5	5	Peroxiredoxin-5, mitochondrial	PRDX5	Peroxiredoxin-5, mitochondrial	1	5	5	5	1	2	2	0	1	0	3	2	1	1	1	1	0	0	0	0	0	0	0	0	1	0	1	0	1	1	0	1	1	0	0	3	0	1	1	1	4	3
P30046;A6NHG4	P30046;A6NHG4	4;3	4;3	4;3	D-dopachrome decarboxylase;D-dopachrome decarboxylase-like protein	DDT;DDTL	D-dopachrome decarboxylase;D-dopachrome decarboxylase-like protein	2	4	4	4	4	3	3	4	3	3	4	3	4	3	4	4	0	0	0	0	0	0	0	0	0	0	0	0	1	1	1	1	1	1	1	0	0	1	0	1	1	1
P30048	P30048	5	5	5	Thioredoxin-dependent peroxide reductase, mitochondrial	PRDX3	Thioredoxin-dependent peroxide reductase, mitochondrial	1	5	5	5	0	1	0	0	0	0	1	0	0	1	1	0	0	0	0	0	0	0	0	0	0	0	0	0	0	0	0	0	0	0	0	0	0	0	0	0	5	4
P30049	P30049	1	1	1	ATP synthase subunit delta, mitochondrial	ATP5D	ATP synthase subunit delta, mitochondrial	1	1	1	1	0	0	0	0	0	0	0	0	0	0	0	0	0	0	0	0	0	0	0	0	0	0	0	0	0	0	0	0	0	0	0	1	0	0	0	0	1	1
P30050	P30050	5	5	5	60S ribosomal protein L12	RPL12	60S ribosomal protein L12	1	5	5	5	3	4	2	0	2	3	4	4	3	4	3	1	2	0	1	2	3	1	3	1	3	3	2	1	4	3	4	4	5	4	4	3	3	2	5	4	1	2
P30084	P30084	5	5	5	Enoyl-CoA hydratase, mitochondrial	ECHS1	Enoyl-CoA hydratase, mitochondrial	1	5	5	5	1	0	1	0	0	0	0	1	1	1	1	1	0	0	0	0	0	0	0	0	0	1	0	0	0	0	0	0	0	0	0	1	0	1	0	0	4	4
P30085	P30085	3	3	3	UMP-CMP kinase	CMPK1	UMP-CMP kinase	1	3	3	3	1	1	0	0	0	1	1	2	1	1	1	1	0	0	0	0	0	0	0	0	0	0	0	0	0	1	1	1	1	1	1	0	0	0	1	0	1	1
P30086	P30086	10	10	10	Phosphatidylethanolamine-binding protein 1;Hippocampal cholinergic neurostimulating peptide	PEBP1	Phosphatidylethanolamine-binding protein 1	1	10	10	10	10	10	9	10	10	10	10	10	9	10	10	10	4	3	3	4	2	3	3	2	4	5	5	2	1	3	2	0	3	1	2	1	2	4	3	2	2	1
P30101	P30101	34	34	34	Protein disulfide-isomerase A3	PDIA3	Protein disulfide-isomerase A3	1	34	34	34	18	21	16	20	19	20	21	24	17	21	22	20	19	20	15	21	21	22	20	21	20	23	19	17	27	27	25	27	28	26	28	29	28	28	28	26	29	28
P30153;P30154	P30153	19;5	19;5	19;5	Serine/threonine-protein phosphatase 2A 65 kDa regulatory subunit A alpha isoform	PPP2R1A	Serine/threonine-protein phosphatase 2A 65 kDa regulatory subunit A alpha isoform	2	19	19	19	11	13	12	5	6	13	14	15	13	13	15	12	6	8	8	9	10	9	10	9	7	10	9	8	10	9	12	13	11	8	8	10	11	8	11	10	3	4
P30405;Q9UNP9	P30405;Q9UNP9	2;1	2;1	2;1	Peptidyl-prolyl cis-trans isomerase F, mitochondrial;Peptidyl-prolyl cis-trans isomerase E	PPIF;PPIE	Peptidyl-prolyl cis-trans isomerase F, mitochondrial;Peptidyl-prolyl cis-trans isomerase E	2	2	2	2	0	0	0	0	0	0	0	0	0	0	0	0	0	0	0	0	0	0	0	0	0	0	0	0	0	0	0	0	0	0	0	0	0	0	0	0	2	2
P30518	P30518	1	1	1	Vasopressin V2 receptor	AVPR2	Vasopressin V2 receptor	1	1	1	1	0	0	0	0	0	0	0	0	0	0	0	0	0	0	0	0	0	0	0	0	0	0	0	0	0	0	0	0	1	0	0	0	0	0	0	0	0	0
P30520	P30520	4	4	4	Adenylosuccinate synthetase isozyme 2	ADSS	Adenylosuccinate synthetase isozyme 2	1	4	4	4	1	0	0	1	1	1	2	0	1	1	1	0	0	0	0	0	0	0	0	0	0	0	0	0	2	1	1	2	3	2	1	1	2	2	2	2	1	2
P30530	P30530	5	5	5	Tyrosine-protein kinase receptor UFO	AXL	Tyrosine-protein kinase receptor UFO	1	5	5	5	0	0	0	0	0	0	0	0	0	0	0	0	0	0	0	0	0	0	0	0	0	0	0	0	5	5	5	5	5	5	5	5	5	5	4	5	3	5
P30533	P30533	6	6	6	Alpha-2-macroglobulin receptor-associated protein	LRPAP1	Alpha-2-macroglobulin receptor-associated protein	1	6	6	6	2	0	0	1	0	0	1	0	0	0	0	0	2	1	1	3	3	2	2	2	1	3	2	2	2	1	2	2	3	2	2	2	1	2	0	1	3	2
P30536	P30536	2	2	2	Translocator protein	TSPO	Translocator protein	1	2	2	2	0	1	0	0	0	0	1	1	0	0	1	0	0	0	0	1	1	0	0	0	1	0	1	0	1	0	0	1	0	1	1	0	0	1	0	1	2	1
P30566	P30566	4	4	4	Adenylosuccinate lyase	ADSL	Adenylosuccinate lyase	1	4	4	4	3	3	4	1	3	2	4	4	4	4	3	2	0	0	0	1	1	0	0	0	0	0	1	0	1	1	1	1	0	1	1	1	0	0	1	1	0	0
P30626	P30626	10	10	10	Sorcin	SRI	Sorcin	1	10	10	10	8	9	9	7	8	8	8	8	9	9	9	10	7	4	6	7	8	6	7	6	8	6	6	4	9	8	8	8	8	8	8	7	9	9	8	10	3	3
P30825	P30825	7	7	6	High affinity cationic amino acid transporter 1	SLC7A1	High affinity cationic amino acid transporter 1	1	7	7	6	7	7	7	7	7	7	6	7	7	7	6	6	4	5	5	4	5	4	4	3	3	5	4	4	4	4	6	4	6	6	4	5	4	5	6	3	5	3
P30837	P30837	6	6	6	Aldehyde dehydrogenase X, mitochondrial	ALDH1B1	Aldehyde dehydrogenase X, mitochondrial	1	6	6	6	0	0	0	0	0	0	0	0	0	0	0	0	0	0	0	0	0	0	0	0	0	0	0	0	0	0	0	0	0	0	0	0	0	0	0	0	3	3
P30876	P30876	3	3	3	DNA-directed RNA polymerase II subunit RPB2	POLR2B	DNA-directed RNA polymerase II subunit RPB2	1	3	3	3	0	1	0	0	0	0	0	0	0	0	0	0	2	2	2	2	3	1	2	2	3	2	2	2	0	0	0	1	0	0	0	0	0	0	0	0	0	0
P31025;Q5VSP4	P31025;Q5VSP4	2;1	2;1	2;1	Lipocalin-1;Putative lipocalin 1-like protein 1	LCN1;LCN1P1	Lipocalin-1;Putative lipocalin 1-like protein 1	2	2	2	2	0	0	0	0	0	0	0	0	1	0	0	2	0	0	0	0	0	0	0	0	0	0	0	0	0	0	0	0	0	0	0	0	0	0	0	0	0	0
P31040	P31040	7	7	7	Succinate dehydrogenase [ubiquinone] flavoprotein subunit, mitochondrial	SDHA	Succinate dehydrogenase [ubiquinone] flavoprotein subunit, mitochondrial	1	7	7	7	0	0	0	0	0	0	0	0	0	0	0	0	0	0	0	1	1	0	0	0	0	0	0	0	1	0	1	1	0	1	0	0	0	0	0	0	6	4
P31146	P31146	4	4	4	Coronin-1A	CORO1A	Coronin-1A	1	4	4	4	3	4	1	0	1	1	2	2	2	2	3	1	0	1	0	1	2	1	0	0	0	0	1	1	2	2	2	4	4	3	4	2	3	2	4	3	0	0
P31150	P31150	21	12	12	Rab GDP dissociation inhibitor alpha	GDI1	Rab GDP dissociation inhibitor alpha	1	21	12	12	18	17	18	18	18	18	18	20	19	18	19	19	5	2	3	6	4	4	3	4	5	5	6	4	5	4	7	6	6	5	5	5	3	5	4	4	1	4
P31151;Q86SG5	P31151;Q86SG5	3;2	3;2	3;2	Protein S100-A7;Protein S100-A7A	S100A7;S100A7A	Protein S100-A7;Protein S100-A7A	2	3	3	3	1	0	0	0	0	0	0	0	0	0	0	0	0	0	0	0	0	0	0	0	0	0	0	0	0	0	0	1	1	0	0	0	0	0	1	0	0	0
P31153	P31153	2	2	2	S-adenosylmethionine synthase isoform type-2	MAT2A	S-adenosylmethionine synthase isoform type-2	1	2	2	2	1	1	1	1	1	2	2	2	2	1	1	2	1	1	2	2	1	2	2	2	1	2	2	1	2	1	1	1	1	2	2	0	0	1	2	2	1	1
P31431	P31431	7	7	7	Syndecan-4	SDC4	Syndecan-4	1	7	7	7	6	5	6	6	7	7	7	7	7	7	7	7	5	5	5	5	4	5	4	4	5	5	5	6	5	4	4	4	5	4	3	5	4	5	4	4	1	1
P31689	P31689	20	20	20	DnaJ homolog subfamily A member 1	DNAJA1	DnaJ homolog subfamily A member 1	1	20	20	20	17	19	18	19	20	19	19	19	20	19	19	19	4	3	6	5	7	5	6	4	4	8	6	5	7	10	10	11	9	12	10	6	8	8	7	9	1	2
P31930	P31930	10	10	10	Cytochrome b-c1 complex subunit 1, mitochondrial	UQCRC1	Cytochrome b-c1 complex subunit 1, mitochondrial	1	10	10	10	0	0	1	0	0	0	1	0	0	0	0	0	0	0	1	0	1	0	1	0	1	0	0	0	0	0	0	0	0	0	0	1	0	0	1	0	9	9
P31937	P31937	1	1	1	3-hydroxyisobutyrate dehydrogenase, mitochondrial	HIBADH	3-hydroxyisobutyrate dehydrogenase, mitochondrial	1	1	1	1	0	0	0	0	0	0	0	0	0	0	0	0	0	0	0	0	0	0	0	0	0	0	0	0	0	0	0	0	0	0	0	0	0	0	0	0	0	0
P31939	P31939	17	17	17	Bifunctional purine biosynthesis protein PURH;Phosphoribosylaminoimidazolecarboxamide formyltransferase;IMP cyclohydrolase	ATIC	Bifunctional purine biosynthesis protein ATIC	1	17	17	17	13	15	10	9	10	14	14	16	15	15	14	14	7	7	8	9	9	9	8	9	8	10	11	9	14	10	14	13	11	11	14	15	12	6	12	14	6	7
P31943;P52597	P31943	6;2	6;2	3;1	Heterogeneous nuclear ribonucleoprotein H;Heterogeneous nuclear ribonucleoprotein H, N-terminally processed	HNRNPH1	Heterogeneous nuclear ribonucleoprotein H	2	6	6	3	4	3	4	3	3	3	3	5	4	4	4	4	3	3	2	3	3	2	1	4	3	4	2	1	2	3	2	4	2	3	4	5	4	2	4	3	1	1
P31944	P31944	5	5	5	Caspase-14;Caspase-14 subunit p17, mature form;Caspase-14 subunit p10, mature form;Caspase-14 subunit p20, intermediate form;Caspase-14 subunit p8, intermediate form	CASP14	Caspase-14	1	5	5	5	1	1	0	3	1	1	0	1	1	1	0	3	0	0	0	0	0	0	0	0	0	0	0	0	0	0	0	0	0	0	0	0	0	0	0	0	0	0
P31946	P31946	15	10	10	14-3-3 protein beta/alpha;14-3-3 protein beta/alpha, N-terminally processed	YWHAB	14-3-3 protein beta/alpha	1	15	10	10	14	14	14	14	14	15	13	13	14	13	13	15	9	8	8	10	10	6	8	7	10	9	9	8	11	12	9	11	10	10	10	9	10	11	9	11	5	7
P31947	P31947	14	11	11	14-3-3 protein sigma	SFN	14-3-3 protein sigma	1	14	11	11	5	4	4	4	3	4	5	3	3	3	3	4	4	3	3	5	3	2	2	2	4	2	4	2	13	13	12	12	12	13	12	13	12	12	11	12	8	7
P31948	P31948	16	16	16	Stress-induced-phosphoprotein 1	STIP1	Stress-induced-phosphoprotein 1	1	16	16	16	10	12	14	8	12	10	13	12	11	10	11	11	5	4	4	7	3	6	6	4	5	8	6	3	0	0	0	0	2	2	0	2	0	0	0	2	2	4
P31949	P31949	7	7	7	Protein S100-A11;Protein S100-A11, N-terminally processed	S100A11	Protein S100-A11	1	7	7	7	3	3	4	4	2	3	4	3	3	3	3	1	3	3	2	4	4	4	3	3	3	4	4	5	6	7	6	6	7	6	5	5	5	6	5	5	5	6
P32119	P32119	9	8	8	Peroxiredoxin-2	PRDX2	Peroxiredoxin-2	1	9	8	8	8	8	8	7	7	7	9	8	8	5	8	7	7	6	7	8	7	6	4	3	7	7	6	6	3	4	6	3	4	4	4	4	2	6	4	4	6	6
P32322	P32322	1	1	1	Pyrroline-5-carboxylate reductase 1, mitochondrial	PYCR1	Pyrroline-5-carboxylate reductase 1, mitochondrial	1	1	1	1	0	0	0	0	0	0	0	0	0	0	0	0	0	0	0	0	0	0	0	0	0	0	0	0	0	0	0	0	0	0	0	0	0	0	0	0	0	0
P32455	P32455	1	1	1	Interferon-induced guanylate-binding protein 1	GBP1	Guanylate-binding protein 1	1	1	1	1	0	0	0	1	0	0	0	0	1	0	0	1	0	1	0	0	0	0	0	0	0	0	1	1	0	0	0	0	0	0	0	0	0	0	0	0	0	0
P32856	P32856	3	3	3	Syntaxin-2	STX2	Syntaxin-2	1	3	3	3	1	2	2	1	2	2	1	2	3	2	2	3	1	2	2	2	2	1	2	2	1	2	1	1	0	0	0	0	0	0	0	0	0	0	0	0	1	0
P32926	P32926	18	18	18	Desmoglein-3	DSG3	Desmoglein-3	1	18	18	18	0	0	0	0	0	0	0	0	0	0	0	0	0	0	0	0	0	0	0	0	0	0	0	0	13	12	11	10	14	13	13	13	10	12	12	11	6	5
P32969	P32969	9	9	9	60S ribosomal protein L9	RPL9	60S ribosomal protein L9	1	9	9	9	3	1	3	0	0	2	2	3	4	3	4	4	8	8	8	6	7	6	8	7	7	8	8	7	7	6	3	2	5	6	2	8	3	5	3	2	1	3
P32970	P32970	4	4	4	CD70 antigen	CD70	CD70 antigen	1	4	4	4	0	0	0	0	0	0	0	0	0	0	0	0	0	0	0	0	0	0	0	0	0	0	0	0	3	2	3	2	3	4	2	3	2	3	2	1	3	2
P33121;Q9ULC5	P33121	5;1	5;1	5;1	Long-chain-fatty-acid--CoA ligase 1	ACSL1	Long-chain-fatty-acid--CoA ligase 1	2	5	5	5	0	0	0	0	1	0	0	1	0	0	0	0	0	0	0	0	0	0	0	0	0	0	0	0	4	3	3	3	3	2	4	3	2	2	4	3	2	2
P33176	P33176	8	8	4	Kinesin-1 heavy chain	KIF5B	Kinesin-1 heavy chain	1	8	8	4	1	2	2	1	0	2	5	4	2	3	2	2	1	0	0	1	1	1	0	0	0	1	0	0	1	1	1	2	1	1	1	1	2	1	2	1	1	0
P33527	P33527	12	12	12	Multidrug resistance-associated protein 1	ABCC1	Multidrug resistance-associated protein 1	1	12	12	12	2	6	6	3	0	3	4	6	5	7	4	5	1	1	3	4	3	1	1	0	0	3	2	1	2	2	2	3	4	3	1	3	0	4	2	1	6	4
P33908	P33908	1	1	1	Mannosyl-oligosaccharide 1,2-alpha-mannosidase IA	MAN1A1	Mannosyl-oligosaccharide 1,2-alpha-mannosidase IA	1	1	1	1	0	0	0	0	0	0	0	0	0	0	0	0	0	0	0	0	0	0	0	0	0	0	0	0	0	0	0	0	1	0	1	0	0	0	1	1	0	0
P33947;O43731	P33947	4;1	4;1	4;1	ER lumen protein-retaining receptor 2	KDELR2	ER lumen protein-retaining receptor 2	2	4	4	4	1	1	0	0	0	0	1	1	1	1	1	1	3	2	2	4	4	3	4	3	3	3	3	1	2	2	2	0	0	0	0	2	0	1	1	0	0	0
P33993	P33993	3	3	3	DNA replication licensing factor MCM7	MCM7	DNA replication licensing factor MCM7	1	3	3	3	0	2	0	0	0	0	1	1	0	0	0	0	3	3	2	2	1	3	3	3	2	2	2	3	0	0	0	0	1	1	1	1	0	0	0	0	0	0
P34059	P34059	3	3	3	N-acetylgalactosamine-6-sulfatase	GALNS	N-acetylgalactosamine-6-sulfatase	1	3	3	3	0	0	0	0	0	0	0	0	0	0	0	0	0	0	0	1	0	1	0	0	0	1	1	0	0	0	0	0	0	0	1	0	0	0	0	1	0	1
P34096	P34096	1	1	1	Ribonuclease 4	RNASE4	Ribonuclease 4	1	1	1	1	1	0	0	1	1	1	0	0	0	0	1	1	0	0	0	1	0	0	0	0	0	0	0	0	0	0	0	0	0	0	0	0	0	0	0	0	0	0
P34741	P34741	5	5	5	Syndecan-2	SDC2	Syndecan-2	1	5	5	5	5	3	5	3	4	5	4	4	5	3	4	3	0	0	0	0	0	0	0	0	1	0	0	0	0	0	0	0	0	0	0	0	0	0	0	0	0	0
P34897	P34897	14	14	14	Serine hydroxymethyltransferase, mitochondrial	SHMT2	Serine hydroxymethyltransferase, mitochondrial	1	14	14	14	0	0	0	0	0	0	1	0	0	0	0	0	0	0	0	0	0	0	0	0	0	0	0	0	1	0	0	1	0	0	0	2	1	0	1	0	11	8
P34932	P34932	23	23	20	Heat shock 70 kDa protein 4	HSPA4	Heat shock 70 kDa protein 4	1	23	23	20	12	14	14	8	13	16	19	17	16	14	17	14	3	3	3	4	2	4	3	2	5	2	2	3	8	11	10	9	6	9	13	8	11	6	10	11	4	4
P35052	P35052	6	6	6	Glypican-1;Secreted glypican-1	GPC1	Glypican-1	1	6	6	6	3	1	3	2	3	3	2	3	3	3	3	3	0	0	0	1	1	2	1	1	5	0	2	2	4	4	2	1	2	4	3	2	2	4	3	2	0	1
P35080	P35080	1	1	1	Profilin-2	PFN2	Profilin-2	1	1	1	1	1	1	1	1	1	1	1	1	1	1	1	1	1	0	1	1	1	0	0	1	0	1	0	0	0	1	0	0	1	1	0	1	0	0	0	1	0	0
P35221;Q9UI47	P35221	32;1	32;1	27;1	Catenin alpha-1	CTNNA1	Catenin alpha-1	2	32	32	27	25	25	27	20	22	27	26	26	28	30	27	28	23	19	19	24	26	20	19	20	19	21	21	21	12	13	17	19	20	19	19	13	14	16	14	16	5	8
P35222	P35222	23	19	19	Catenin beta-1	CTNNB1	Catenin beta-1	1	23	19	19	15	17	17	17	16	18	19	20	18	16	19	19	10	9	8	10	11	8	10	6	8	14	10	8	5	9	12	9	13	11	7	7	6	13	11	11	5	6
P35232	P35232	14	14	14	Prohibitin	PHB	Prohibitin	1	14	14	14	3	3	2	2	4	4	5	4	4	4	5	3	2	1	1	4	4	4	3	4	1	3	2	3	2	1	0	0	0	0	0	1	0	1	0	0	9	7
P35240	P35240	4	4	4	Merlin	NF2	Merlin	1	4	4	4	3	3	4	2	3	4	3	4	4	3	4	4	0	0	0	0	0	0	0	0	1	0	0	0	0	0	0	0	0	0	0	0	0	0	0	0	1	1
P35241	P35241	29	18	18	Radixin	RDX	Radixin	1	29	18	18	24	22	24	22	22	23	24	26	22	23	24	26	8	7	7	7	10	8	8	9	6	10	6	8	10	14	14	11	18	16	14	10	10	13	11	13	10	12
P35249	P35249	3	3	3	Replication factor C subunit 4	RFC4	Replication factor C subunit 4	1	3	3	3	0	1	0	0	0	0	0	0	0	1	0	0	1	2	1	1	1	1	2	1	2	2	2	1	0	0	0	1	0	0	0	0	0	0	0	0	1	1
P35250	P35250	4	4	4	Replication factor C subunit 2	RFC2	Replication factor C subunit 2	1	4	4	4	1	2	0	0	0	0	3	2	0	2	1	2	2	2	2	3	3	2	3	2	2	3	3	1	0	1	0	0	0	1	0	1	1	0	0	1	0	0
P35251	P35251	1	1	1	Replication factor C subunit 1	RFC1	Replication factor C subunit 1	1	1	1	1	0	0	0	0	0	0	1	1	0	0	0	0	1	1	1	1	1	1	1	1	1	1	1	1	0	0	0	0	0	0	0	0	0	0	0	0	0	0
P35268	P35268	2	2	2	60S ribosomal protein L22	RPL22	60S ribosomal protein L22	1	2	2	2	0	1	1	1	0	0	1	1	1	0	2	1	1	1	2	2	2	2	1	2	2	1	2	1	1	0	1	1	0	0	1	1	0	0	0	1	1	1
P35270	P35270	1	1	1	Sepiapterin reductase	SPR	Sepiapterin reductase	1	1	1	1	0	0	0	0	0	0	0	0	0	0	0	0	0	0	0	0	0	0	0	0	0	0	0	0	0	0	0	0	0	0	0	0	0	0	0	0	0	0
P35443	P35443	4	3	3	Thrombospondin-4	THBS4	Thrombospondin-4	1	4	3	3	2	2	1	2	2	1	2	1	1	2	3	0	3	2	3	0	1	1	2	2	0	2	3	3	0	0	0	0	0	0	0	0	0	0	1	0	0	0
P35527;CON__P35527	P35527;CON__P35527	44;43	44;43	43;42	Keratin, type I cytoskeletal 9	KRT9	Keratin, type I cytoskeletal 9;	2	44	44	43	40	32	22	44	29	32	25	34	40	35	26	41	32	28	25	23	29	20	27	25	22	26	27	33	33	19	24	17	19	34	26	25	30	21	33	23	20	12
P35556	P35556	4	4	4	Fibrillin-2	FBN2	Fibrillin-2	1	4	4	4	0	0	0	0	0	0	0	0	0	0	0	0	0	0	0	0	0	0	0	0	0	0	0	0	0	2	0	1	1	3	1	0	0	0	0	0	0	0
P35579	P35579	76	76	56	Myosin-9	MYH9	Myosin-9	1	76	76	56	26	38	28	15	14	19	34	41	34	25	34	27	37	36	33	41	42	34	32	36	38	38	36	37	47	46	45	50	53	48	49	51	46	38	43	45	22	28
P35580	P35580	47	31	29	Myosin-10	MYH10	Myosin-10	1	47	31	29	18	22	20	9	8	11	24	25	19	15	15	16	20	20	19	21	20	21	17	18	19	24	22	19	35	27	34	29	27	35	31	31	28	22	27	27	14	11
P35606	P35606	17	17	17	Coatomer subunit beta	COPB2	Coatomer subunit beta	1	17	17	17	1	3	3	1	1	0	2	5	2	3	7	2	3	2	3	2	4	1	3	2	2	4	2	2	12	10	12	15	13	15	13	13	15	3	13	14	1	1
P35609	P35609	14	4	3	Alpha-actinin-2	ACTN2	Alpha-actinin-2	1	14	4	3	4	4	4	6	10	4	4	7	7	5	5	5	4	3	4	4	6	5	4	2	5	7	5	4	7	5	7	5	8	7	4	7	6	7	4	5	8	9
P35613	P35613	11	11	11	Basigin	BSG	Basigin	1	11	11	11	10	11	11	11	11	11	10	11	10	10	10	10	6	6	5	7	6	6	7	5	5	6	6	6	10	11	11	10	10	11	10	11	11	10	11	10	6	7
P35625	P35625	4	4	4	Metalloproteinase inhibitor 3	TIMP3	Metalloproteinase inhibitor 3	1	4	4	4	0	1	0	0	0	1	0	0	0	0	1	0	0	0	0	1	0	0	0	0	0	2	0	0	1	1	1	1	1	1	2	1	1	1	2	2	0	0
P35637;Q92804	P35637	6;1	6;1	6;1	RNA-binding protein FUS	FUS	RNA-binding protein FUS	2	6	6	6	0	1	0	1	1	0	0	4	2	1	2	1	0	0	0	0	0	0	0	0	0	0	0	0	1	1	3	5	4	2	0	0	2	1	1	2	4	5
P35998	P35998	12	12	12	26S protease regulatory subunit 7	PSMC2	26S proteasome regulatory subunit 7	1	12	12	12	4	5	4	0	1	4	5	4	6	5	5	4	8	7	7	7	7	6	6	9	6	9	8	7	9	6	7	7	7	8	9	6	7	5	7	5	1	1
P36021	P36021	1	1	1	Monocarboxylate transporter 8	SLC16A2	Monocarboxylate transporter 8	1	1	1	1	1	1	1	1	1	1	1	1	1	1	1	0	1	1	1	1	1	1	1	1	1	1	1	1	0	0	0	0	1	0	0	0	0	1	0	1	0	0
P36383	P36383	5	5	5	Gap junction gamma-1 protein	GJC1	Gap junction gamma-1 protein	1	5	5	5	4	4	5	4	5	5	4	5	5	5	4	5	0	0	0	0	0	0	0	0	0	0	0	0	0	0	0	0	0	0	0	0	0	0	0	0	0	0
P36406	P36406	2	2	2	E3 ubiquitin-protein ligase TRIM23	TRIM23	E3 ubiquitin-protein ligase TRIM23	1	2	2	2	1	1	1	1	1	2	1	1	1	1	1	1	0	0	0	0	1	0	0	0	0	1	0	0	2	2	2	2	2	1	2	2	2	2	2	2	0	0
P36507;Q02750	P36507;Q02750	2;1	2;1	2;1	Dual specificity mitogen-activated protein kinase kinase 2;Dual specificity mitogen-activated protein kinase kinase 1	MAP2K2;MAP2K1	Dual specificity mitogen-activated protein kinase kinase 2;Dual specificity mitogen-activated protein kinase kinase 1	2	2	2	2	1	2	2	1	0	1	2	2	2	2	2	2	0	0	0	0	1	0	0	0	0	0	0	1	1	1	1	1	1	1	1	1	1	1	1	1	0	0
P36542	P36542	4	4	4	ATP synthase subunit gamma, mitochondrial	ATP5C1	ATP synthase subunit gamma, mitochondrial	1	4	4	4	0	0	0	0	0	0	0	0	0	0	0	0	0	0	0	0	0	0	0	0	0	0	0	0	0	0	0	0	0	2	0	0	0	0	0	0	4	2
P36543	P36543	2	2	2	V-type proton ATPase subunit E 1	ATP6V1E1	V-type proton ATPase subunit E 1	1	2	2	2	1	1	1	1	1	1	1	1	1	1	1	1	1	0	1	1	1	1	1	1	1	1	1	1	0	0	0	0	0	0	0	0	0	0	0	0	0	1
P36578	P36578	21	21	21	60S ribosomal protein L4	RPL4	60S ribosomal protein L4	1	21	21	21	6	10	10	8	9	8	10	10	11	11	13	11	18	17	15	18	20	16	16	18	19	18	18	14	17	14	8	8	13	12	11	19	7	15	14	14	9	7
P36776	P36776	11	11	11	Lon protease homolog, mitochondrial	LONP1	Lon protease homolog, mitochondrial	1	11	11	11	0	0	0	1	0	1	0	0	0	0	0	1	1	1	1	1	1	0	1	2	0	1	1	1	0	0	0	0	0	0	0	0	0	0	0	0	9	8
P36871	P36871	13	13	13	Phosphoglucomutase-1	PGM1	Phosphoglucomutase-1	1	13	13	13	12	11	12	10	10	10	11	12	11	9	10	11	4	5	5	5	6	7	7	7	6	5	8	6	4	7	6	4	4	5	6	4	4	5	4	2	0	0
P36873	P36873	14	14	2	Serine/threonine-protein phosphatase PP1-gamma catalytic subunit	PPP1CC	Serine/threonine-protein phosphatase PP1-gamma catalytic subunit	1	14	14	2	11	11	11	8	8	10	12	11	10	12	14	9	11	11	8	10	9	10	9	11	7	11	10	9	10	10	11	13	10	10	11	10	10	11	10	10	7	10
P36897	P36897	3	3	3	TGF-beta receptor type-1	TGFBR1	TGF-beta receptor type-1	1	3	3	3	0	1	1	0	1	1	1	2	1	1	2	0	0	0	0	1	0	0	0	0	0	0	0	0	0	1	0	1	1	1	0	2	1	2	0	1	0	0
P36952	P36952	15	15	15	Serpin B5	SERPINB5	Serpin B5	1	15	15	15	0	0	0	0	0	0	0	0	0	0	0	0	1	1	1	1	2	2	2	2	2	1	1	1	10	10	9	9	11	10	10	9	10	9	10	8	5	6
P36955	P36955	4	1	1	Pigment epithelium-derived factor	SERPINF1	Pigment epithelium-derived factor	1	4	1	1	1	1	2	1	2	2	2	2	2	3	1	2	1	1	0	0	1	0	0	0	0	0	0	0	2	3	3	3	2	2	1	1	3	0	3	2	2	1
P36957	P36957	4	4	4	Dihydrolipoyllysine-residue succinyltransferase component of 2-oxoglutarate dehydrogenase complex, mitochondrial	DLST	Dihydrolipoyllysine-residue succinyltransferase component of 2-oxoglutarate dehydrogenase complex, mitochondrial	1	4	4	4	0	0	0	0	0	0	1	0	1	0	1	0	1	1	1	1	1	1	0	1	1	1	1	1	1	1	2	2	1	1	2	1	1	1	2	1	3	4
P37108	P37108	1	1	1	Signal recognition particle 14 kDa protein	SRP14	Signal recognition particle 14 kDa protein	1	1	1	1	1	1	0	0	1	0	1	1	1	0	1	1	1	0	1	1	1	0	0	1	1	1	0	0	0	0	0	0	0	0	0	0	0	0	1	0	0	0
P37235;P84074;P61601	P37235;P84074;P61601	2;2;1	2;2;1	2;2;1	Hippocalcin-like protein 1;Neuron-specific calcium-binding protein hippocalcin;Neurocalcin-delta	HPCAL1;HPCA;NCALD	Hippocalcin-like protein 1;Neuron-specific calcium-binding protein hippocalcin;Neurocalcin-delta	3	2	2	2	1	1	1	1	1	1	1	1	1	1	1	1	1	0	1	0	0	0	1	1	1	0	1	1	1	1	1	2	2	1	1	1	1	1	1	1	1	1
P37268	P37268	10	10	10	Squalene synthase	FDFT1	Squalene synthase	1	10	10	10	0	0	0	0	0	0	0	0	0	0	0	0	3	3	4	4	4	5	5	2	2	4	2	2	6	5	5	5	3	7	5	8	4	7	5	5	6	4
P37802	P37802	14	14	13	Transgelin-2	TAGLN2	Transgelin-2	1	14	14	13	12	10	12	11	12	12	11	13	11	11	10	12	7	7	7	8	8	6	7	7	6	9	10	8	6	8	8	9	8	10	9	8	8	8	7	8	6	5
P37837	P37837	7	7	7	Transaldolase	TALDO1	Transaldolase	1	7	7	7	3	2	5	4	5	4	3	3	4	5	4	5	0	0	0	0	0	0	0	0	0	0	1	0	1	2	0	1	1	1	0	0	1	0	0	1	0	0
P38117	P38117	10	10	10	Electron transfer flavoprotein subunit beta	ETFB	Electron transfer flavoprotein subunit beta	1	10	10	10	0	0	0	0	0	0	0	0	0	0	0	0	0	0	0	0	0	0	0	0	0	0	0	0	1	0	0	1	0	0	0	0	0	0	0	0	10	10
P38606	P38606	8	8	8	V-type proton ATPase catalytic subunit A	ATP6V1A	V-type proton ATPase catalytic subunit A	1	8	8	8	1	2	3	1	3	2	2	3	1	3	3	2	2	2	2	2	3	0	2	2	1	4	2	1	6	4	5	4	5	7	6	4	2	1	6	5	1	0
P38646	P38646	23	23	23	Stress-70 protein, mitochondrial	HSPA9	Stress-70 protein, mitochondrial	1	23	23	23	0	0	1	0	0	0	2	0	0	0	0	0	2	1	2	4	1	0	0	1	0	0	0	2	1	2	2	2	2	2	1	3	2	1	1	1	20	18
P38919	P38919	9	8	8	Eukaryotic initiation factor 4A-III;Eukaryotic initiation factor 4A-III, N-terminally processed	EIF4A3	Eukaryotic initiation factor 4A-III	1	9	8	8	3	2	3	1	1	1	3	6	3	4	3	2	3	2	3	3	3	3	2	3	1	3	2	3	7	5	6	7	7	5	6	5	5	4	6	6	0	0
P39019	P39019	4	4	4	40S ribosomal protein S19	RPS19	40S ribosomal protein S19	1	4	4	4	1	1	2	1	2	1	1	1	1	0	0	1	0	0	0	0	0	0	0	0	0	0	1	0	0	0	0	0	0	0	0	0	0	0	0	0	1	1
P39023	P39023	22	22	20	60S ribosomal protein L3	RPL3	60S ribosomal protein L3	1	22	22	20	8	13	8	5	7	7	13	10	9	4	11	4	20	19	17	20	20	18	18	19	19	18	19	17	15	13	8	9	13	10	9	13	9	12	10	11	9	9
P39060;REV__Q08AN1;REV__Q14152	P39060	27;1;1	27;1;1	27;1;1	Collagen alpha-1(XVIII) chain;Endostatin	COL18A1	Collagen alpha-1(XVIII) chain	3	27	27	27	23	25	23	22	23	21	24	25	23	22	20	18	22	23	22	23	23	22	20	21	25	21	23	21	2	1	3	2	2	5	3	3	1	2	4	2	2	1
P39656	P39656	15	15	15	Dolichyl-diphosphooligosaccharide--protein glycosyltransferase 48 kDa subunit	DDOST	Dolichyl-diphosphooligosaccharide--protein glycosyltransferase 48 kDa subunit	1	15	15	15	7	9	7	6	2	4	9	9	4	7	7	7	9	8	9	13	13	9	10	12	11	13	11	7	11	9	8	8	8	6	7	9	7	10	9	8	8	8
P39687;Q92688	P39687;Q92688	2;1	2;1	2;1	Acidic leucine-rich nuclear phosphoprotein 32 family member A;Acidic leucine-rich nuclear phosphoprotein 32 family member B	ANP32A;ANP32B	Acidic leucine-rich nuclear phosphoprotein 32 family member A;Acidic leucine-rich nuclear phosphoprotein 32 family member B	2	2	2	2	1	1	1	1	2	2	1	2	2	1	1	2	0	0	0	0	1	1	1	1	0	0	1	1	0	0	0	0	0	0	0	0	0	0	0	0	0	0
P39748	P39748	2	1	1	Flap endonuclease 1	FEN1	Flap endonuclease 1	1	2	1	1	0	1	1	0	0	0	0	2	1	0	1	1	0	1	1	0	0	0	1	0	1	0	0	0	0	0	0	0	0	0	0	0	0	0	0	0	0	0
P40227;Q92526	P40227	19;6	19;6	19;6	T-complex protein 1 subunit zeta	CCT6A	T-complex protein 1 subunit zeta	2	19	19	19	13	15	14	8	11	8	15	14	16	13	12	10	9	10	9	9	12	11	12	10	11	12	8	9	13	13	16	13	12	14	13	12	13	11	16	16	4	6
P40261	P40261	11	11	11	Nicotinamide N-methyltransferase	NNMT	Nicotinamide N-methyltransferase	1	11	11	11	1	1	1	1	0	1	1	1	2	1	1	1	1	1	1	1	0	2	1	1	0	2	0	2	11	10	10	11	9	9	8	9	9	6	10	10	3	4
P40429;Q6NVV1	P40429	8;3	8;3	8;3	60S ribosomal protein L13a	RPL13A	60S ribosomal protein L13a	2	8	8	8	3	4	4	3	3	3	3	3	2	3	4	3	7	5	7	6	5	6	6	6	7	5	6	6	5	5	3	3	5	5	4	5	4	4	4	3	3	6
P40616	P40616	3	3	3	ADP-ribosylation factor-like protein 1	ARL1	ADP-ribosylation factor-like protein 1	1	3	3	3	1	2	0	0	0	0	2	2	1	0	2	1	2	2	2	2	2	3	3	2	1	2	2	3	1	2	0	1	0	1	1	1	1	0	1	0	0	0
P40763	P40763	3	3	3	Signal transducer and activator of transcription 3	STAT3	Signal transducer and activator of transcription 3	1	3	3	3	0	0	0	0	0	0	0	0	0	0	0	0	0	0	0	0	0	0	0	0	0	0	0	0	2	2	2	2	0	0	2	1	2	0	2	2	0	0
P40925	P40925	9	9	9	Malate dehydrogenase, cytoplasmic	MDH1	Malate dehydrogenase, cytoplasmic	1	9	9	9	8	8	8	8	8	9	8	8	8	8	8	8	2	2	2	3	4	2	2	3	1	3	2	2	4	5	3	3	4	4	4	5	2	7	5	6	3	2
P40926	P40926	17	17	17	Malate dehydrogenase, mitochondrial	MDH2	Malate dehydrogenase, mitochondrial	1	17	17	17	4	1	3	4	3	4	8	4	7	6	9	7	0	0	2	5	4	3	2	1	3	3	1	2	2	2	0	2	3	4	2	6	1	3	4	1	14	13
P40937	P40937	1	1	1	Replication factor C subunit 5	RFC5	Replication factor C subunit 5	1	1	1	1	0	0	0	0	0	0	0	0	0	0	0	0	0	0	0	1	0	0	0	0	0	0	0	0	0	0	0	0	0	0	0	0	0	0	0	0	0	0
P40938	P40938	2	2	2	Replication factor C subunit 3	RFC3	Replication factor C subunit 3	1	2	2	2	0	1	1	0	0	0	1	1	1	1	1	0	2	2	2	2	2	2	2	1	2	2	2	1	0	0	1	1	1	1	0	0	1	0	1	1	0	0
P40939	P40939	17	17	17	Trifunctional enzyme subunit alpha, mitochondrial;Long-chain enoyl-CoA hydratase;Long chain 3-hydroxyacyl-CoA dehydrogenase	HADHA	Trifunctional enzyme subunit alpha, mitochondrial	1	17	17	17	0	0	0	0	0	0	0	0	0	0	0	0	0	0	1	0	1	0	1	0	0	0	0	1	0	0	0	0	1	0	0	1	0	0	1	0	11	11
Q2VIR3;P41091	Q2VIR3;P41091	4;4	4;4	4;4	Putative eukaryotic translation initiation factor 2 subunit 3-like protein;Eukaryotic translation initiation factor 2 subunit 3	EIF2S3L;EIF2S3	Eukaryotic translation initiation factor 2 subunit 3B;Eukaryotic translation initiation factor 2 subunit 3	2	4	4	4	0	0	0	0	0	0	1	0	0	1	1	0	0	0	0	0	0	0	0	0	0	0	0	0	3	0	0	2	0	1	2	1	2	1	3	1	0	0
P41221;Q9H1J7	P41221	3;1	3;1	3;1	Protein Wnt-5a	WNT5A	Protein Wnt-5a	2	3	3	3	1	3	2	0	1	1	3	2	2	2	3	0	0	0	0	0	0	0	0	0	0	0	0	0	0	0	0	0	0	0	0	0	0	0	0	0	0	0
P41250	P41250	7	7	7	Glycine--tRNA ligase	GARS	Glycine--tRNA ligase	1	7	7	7	4	5	4	1	2	2	5	4	5	6	6	3	2	2	2	1	2	2	2	2	2	1	2	2	4	2	3	4	4	4	4	4	4	1	4	4	3	3
P41252	P41252	31	31	31	Isoleucine--tRNA ligase, cytoplasmic	IARS	Isoleucine--tRNA ligase, cytoplasmic	1	31	31	31	11	24	18	3	5	6	22	23	20	15	19	11	16	9	10	10	18	11	13	12	14	15	12	11	23	23	23	26	19	22	25	21	21	18	23	23	2	4
P41440	P41440	7	7	7	Folate transporter 1	SLC19A1	Reduced folate transporter	1	7	7	7	4	3	4	4	3	4	5	4	4	4	4	4	2	2	2	2	1	2	2	2	2	3	3	1	0	2	0	1	1	1	2	0	0	2	2	2	0	0
P41567;O60739	P41567;O60739	2;1	2;1	2;1	Eukaryotic translation initiation factor 1;Eukaryotic translation initiation factor 1b	EIF1;EIF1B	Eukaryotic translation initiation factor 1;Eukaryotic translation initiation factor 1b	2	2	2	2	2	2	2	2	1	2	2	2	1	2	1	1	0	0	0	0	1	0	0	0	0	0	0	0	0	0	0	0	0	0	0	0	0	0	0	0	0	0
P41732	P41732	3	3	3	Tetraspanin-7	TSPAN7	Tetraspanin-7	1	3	3	3	1	3	3	2	3	3	2	2	3	2	2	2	0	0	2	1	1	1	0	0	0	0	1	1	0	0	0	0	0	0	0	0	0	0	0	0	0	0
P42126	P42126	5	5	5	Enoyl-CoA delta isomerase 1, mitochondrial	ECI1	Enoyl-CoA delta isomerase 1, mitochondrial	1	5	5	5	0	0	0	0	0	0	0	0	0	0	0	0	1	0	0	1	2	1	1	1	1	1	1	1	0	1	0	1	0	0	0	0	1	1	1	1	3	1
P42166	P42166	7	7	7	Lamina-associated polypeptide 2, isoform alpha;Thymopoietin;Thymopentin	TMPO	Lamina-associated polypeptide 2, isoform alpha	1	7	7	7	0	2	0	1	1	2	2	1	1	1	1	1	5	6	5	6	6	6	6	4	5	4	4	5	0	0	0	0	0	0	0	0	0	0	0	0	0	0
P42356;A4QPH2;Q8N8J0	P42356	23;3;1	23;3;1	23;3;1	Phosphatidylinositol 4-kinase alpha	PI4KA	Phosphatidylinositol 4-kinase alpha	3	23	23	23	10	17	12	1	3	7	15	15	16	10	14	14	3	0	1	2	3	1	0	0	1	2	0	2	1	1	2	3	1	3	2	1	2	4	1	3	1	4
P42357	P42357	3	3	3	Histidine ammonia-lyase	HAL	Histidine ammonia-lyase	1	3	3	3	0	0	0	0	2	1	0	2	1	1	0	1	2	3	2	2	3	1	3	1	2	3	2	2	0	0	0	0	0	0	0	0	0	0	0	0	0	0
P42704	P42704	29	29	29	Leucine-rich PPR motif-containing protein, mitochondrial	LRPPRC	Leucine-rich PPR motif-containing protein, mitochondrial	1	29	29	29	1	1	1	0	1	1	1	1	1	1	1	1	1	2	2	1	1	1	1	2	0	1	1	1	0	0	0	0	0	0	0	0	0	0	0	2	21	18
P42765	P42765	4	4	4	3-ketoacyl-CoA thiolase, mitochondrial	ACAA2	3-ketoacyl-CoA thiolase, mitochondrial	1	4	4	4	0	0	0	0	0	0	0	0	0	0	0	0	0	0	0	0	0	0	0	0	0	0	0	0	0	0	0	0	0	0	0	0	0	0	0	0	4	4
P42766	P42766	3	2	2	60S ribosomal protein L35	RPL35	60S ribosomal protein L35	1	3	2	2	2	2	1	2	1	1	2	3	3	3	3	3	2	3	2	3	3	3	2	3	1	2	1	1	2	2	1	1	2	2	1	2	2	1	1	1	1	0
P42785	P42785	4	4	4	Lysosomal Pro-X carboxypeptidase	PRCP	Lysosomal Pro-X carboxypeptidase	1	4	4	4	1	1	0	0	0	0	1	0	2	0	0	0	1	0	0	1	1	0	1	1	1	2	1	0	1	1	0	0	1	0	0	1	0	0	1	0	1	2
P43003	P43003	3	3	3	Excitatory amino acid transporter 1	SLC1A3	Excitatory amino acid transporter 1	1	3	3	3	2	2	2	2	2	2	2	2	2	2	3	2	0	0	0	0	0	0	0	1	0	0	0	0	2	2	2	1	0	1	1	1	2	2	1	1	2	2
P43007	P43007	6	6	6	Neutral amino acid transporter A	SLC1A4	Neutral amino acid transporter A	1	6	6	6	4	3	4	3	4	5	3	3	3	5	4	5	1	0	0	0	1	0	0	1	1	1	0	0	1	1	2	2	1	0	1	1	1	1	1	2	0	0
P43034	P43034	4	4	4	Platelet-activating factor acetylhydrolase IB subunit alpha	PAFAH1B1	Platelet-activating factor acetylhydrolase IB subunit alpha	1	4	4	4	4	2	3	1	2	3	4	2	3	3	4	3	0	1	0	2	3	1	3	1	3	2	2	0	3	4	2	4	2	2	3	4	4	3	4	3	1	1
P43121	P43121	5	5	5	Cell surface glycoprotein MUC18	MCAM	Cell surface glycoprotein MUC18	1	5	5	5	2	2	4	4	1	4	3	4	3	2	4	4	0	1	1	1	1	1	1	0	1	1	1	1	1	0	0	0	0	0	0	1	0	0	0	0	0	0
P43243	P43243	6	6	6	Matrin-3	MATR3	Matrin-3	1	6	6	6	1	2	0	1	0	0	2	2	1	0	1	0	3	3	3	3	2	3	3	2	2	3	3	2	2	2	2	1	1	0	1	1	0	0	0	0	1	1
P43250;P34947;P32298	P43250	7;2;1	7;2;1	7;2;1	G protein-coupled receptor kinase 6	GRK6	G protein-coupled receptor kinase 6	3	7	7	7	3	5	5	0	2	4	7	7	7	7	6	6	3	1	1	2	2	1	2	1	1	3	1	1	0	0	0	0	0	0	0	0	0	0	0	1	0	0
P43304	P43304	7	7	7	Glycerol-3-phosphate dehydrogenase, mitochondrial	GPD2	Glycerol-3-phosphate dehydrogenase, mitochondrial	1	7	7	7	1	0	0	1	0	1	2	1	1	1	1	1	0	0	0	0	0	0	0	0	1	1	1	1	1	1	0	0	1	0	0	1	0	1	0	0	5	4
P43307	P43307	4	4	4	Translocon-associated protein subunit alpha	SSR1	Translocon-associated protein subunit alpha	1	4	4	4	2	2	2	2	1	2	2	3	1	2	3	2	3	3	3	3	3	3	3	3	3	3	3	3	3	3	3	3	3	3	3	3	3	2	3	3	3	2
P43487	P43487	3	3	3	Ran-specific GTPase-activating protein	RANBP1	Ran-specific GTPase-activating protein	1	3	3	3	3	3	3	3	3	3	3	3	3	3	3	3	0	0	0	0	0	1	0	1	1	0	0	0	1	1	1	1	0	1	2	1	2	0	1	0	0	0
P43490	P43490	5	5	5	Nicotinamide phosphoribosyltransferase	NAMPT	Nicotinamide phosphoribosyltransferase	1	5	5	5	1	1	2	0	0	0	1	2	0	1	1	2	1	1	1	2	1	0	1	0	1	1	1	1	1	0	2	1	0	2	2	2	2	1	1	3	2	2
P43686	P43686	10	10	10	26S protease regulatory subunit 6B	PSMC4	26S proteasome regulatory subunit 6B	1	10	10	10	1	3	3	0	1	1	7	6	5	2	4	5	7	6	5	6	7	4	7	4	5	6	5	3	9	8	9	9	8	9	8	7	9	5	5	7	0	0
P43897	P43897	2	2	2	Elongation factor Ts, mitochondrial	TSFM	Elongation factor Ts, mitochondrial	1	2	2	2	0	0	0	0	0	0	0	0	0	0	0	0	0	0	0	0	0	0	0	0	0	0	0	0	0	0	0	0	0	0	0	0	0	0	0	0	0	1
P45877	P45877	3	3	3	Peptidyl-prolyl cis-trans isomerase C	PPIC	Peptidyl-prolyl cis-trans isomerase C	1	3	3	3	0	0	0	0	0	0	1	0	0	0	0	0	1	1	1	1	2	1	1	1	1	1	1	1	2	1	1	1	2	2	2	2	0	2	1	0	1	1
P45880	P45880	13	13	13	Voltage-dependent anion-selective channel protein 2	VDAC2	Voltage-dependent anion-selective channel protein 2	1	13	13	13	1	3	3	1	1	1	3	3	3	2	3	3	5	4	4	5	4	5	3	4	4	5	3	5	4	2	3	2	3	5	3	3	1	6	5	2	12	8
P45974;Q92995	P45974	5;1	5;1	5;1	Ubiquitin carboxyl-terminal hydrolase 5	USP5	Ubiquitin carboxyl-terminal hydrolase 5	2	5	5	5	3	2	4	0	1	0	4	4	3	1	1	2	2	2	2	1	2	2	2	3	3	2	3	2	3	2	1	3	3	2	2	3	2	3	4	4	1	0
P46060	P46060	3	3	3	Ran GTPase-activating protein 1	RANGAP1	Ran GTPase-activating protein 1	1	3	3	3	2	2	2	0	0	1	2	1	3	1	1	3	1	1	1	1	1	1	1	1	0	1	0	0	1	0	1	0	1	1	1	1	1	1	1	1	0	0
P46063	P46063	2	2	2	ATP-dependent DNA helicase Q1	RECQL	ATP-dependent DNA helicase Q1	1	2	2	2	0	0	0	0	0	0	0	0	0	0	0	0	0	0	0	0	0	0	0	0	1	0	0	0	0	0	1	1	1	1	1	1	1	0	1	1	0	0
P46108	P46108	4	4	4	Adapter molecule crk	CRK	Adapter molecule crk	1	4	4	4	2	2	4	2	2	2	1	2	1	2	2	4	0	0	0	1	1	0	0	1	0	0	0	0	0	0	0	0	0	1	0	0	0	0	0	0	1	1
P46109	P46109	3	3	3	Crk-like protein	CRKL	Crk-like protein	1	3	3	3	2	3	3	2	3	2	3	3	2	3	1	3	0	0	0	0	0	0	0	0	0	0	0	0	0	0	0	0	0	0	0	0	0	0	0	1	0	0
P46459	P46459	3	3	3	Vesicle-fusing ATPase	NSF	Vesicle-fusing ATPase	1	3	3	3	1	1	0	0	0	0	2	1	1	0	1	1	0	0	0	0	0	0	1	0	0	0	0	1	0	0	0	0	0	0	0	0	0	0	0	0	0	0
P46531	P46531	11	11	11	Neurogenic locus notch homolog protein 1;Notch 1 extracellular truncation;Notch 1 intracellular domain	NOTCH1	Neurogenic locus notch homolog protein 1	1	11	11	11	1	2	5	1	2	2	4	7	5	5	5	4	2	3	6	2	5	5	5	3	2	5	3	3	1	3	3	4	3	4	2	1	2	3	3	4	0	1
P46776	P46776	6	6	6	60S ribosomal protein L27a	RPL27A	60S ribosomal protein L27a	1	6	6	6	4	2	2	2	3	3	3	3	3	5	4	4	6	6	6	6	6	6	6	6	5	5	6	6	6	6	5	6	4	5	4	6	3	5	6	5	3	3
P46777	P46777	11	11	11	60S ribosomal protein L5	RPL5	60S ribosomal protein L5	1	11	11	11	3	6	3	2	1	5	6	4	3	2	4	2	8	9	9	8	8	8	8	8	8	8	8	8	8	6	7	8	6	6	5	8	7	7	6	7	3	4
P46778	P46778	4	4	4	60S ribosomal protein L21	RPL21	60S ribosomal protein L21	1	4	4	4	1	1	1	1	0	1	1	1	1	1	1	1	4	3	3	3	4	3	3	4	3	2	4	2	2	2	1	2	2	2	2	2	1	3	2	1	1	1
P46779	P46779	7	7	7	60S ribosomal protein L28	RPL28	60S ribosomal protein L28	1	7	7	7	3	3	2	0	2	2	2	2	2	1	3	2	6	5	5	6	6	7	6	6	6	6	6	6	5	6	5	6	5	4	3	6	2	4	5	5	3	3
P46781	P46781	12	12	12	40S ribosomal protein S9	RPS9	40S ribosomal protein S9	1	12	12	12	5	8	4	6	5	6	4	5	3	5	6	5	9	9	9	10	8	10	9	9	11	9	10	8	8	7	5	8	7	8	9	9	7	11	9	7	7	6
P46782	P46782	4	4	4	40S ribosomal protein S5;40S ribosomal protein S5, N-terminally processed	RPS5	40S ribosomal protein S5	1	4	4	4	2	2	3	1	2	3	3	3	3	4	3	3	2	1	3	3	2	1	3	2	3	2	4	1	2	3	2	1	2	2	2	1	3	1	1	2	1	1
P46783	P46783	3	3	3	40S ribosomal protein S10	RPS10	40S ribosomal protein S10	1	3	3	3	0	1	1	0	1	1	2	2	1	1	1	1	1	1	2	1	1	0	1	1	3	1	0	0	1	2	2	1	2	2	1	2	1	3	2	2	1	2
P46926;Q8TDQ7	P46926;Q8TDQ7	3;2	3;2	3;2	Glucosamine-6-phosphate isomerase 1;Glucosamine-6-phosphate isomerase 2	GNPDA1;GNPDA2	Glucosamine-6-phosphate isomerase 1;Glucosamine-6-phosphate isomerase 2	2	3	3	3	2	2	3	0	2	1	1	2	1	0	2	1	2	1	0	1	1	0	1	0	1	0	2	2	0	0	0	0	0	1	0	0	0	0	0	0	0	0
P46940	P46940	49	49	46	Ras GTPase-activating-like protein IQGAP1	IQGAP1	Ras GTPase-activating-like protein IQGAP1	1	49	49	46	26	28	25	15	17	26	33	33	30	34	34	30	27	25	22	29	28	27	22	22	24	34	25	26	19	22	16	17	24	19	16	17	14	18	18	20	24	29
P46977	P46977	15	15	15	Dolichyl-diphosphooligosaccharide--protein glycosyltransferase subunit STT3A	STT3A	Dolichyl-diphosphooligosaccharide--protein glycosyltransferase subunit STT3A	1	15	15	15	7	6	5	6	4	5	8	7	8	7	9	7	10	7	7	10	8	10	8	8	8	9	9	8	12	8	9	10	7	8	9	11	7	12	8	9	8	8
P47755	P47755	3	2	2	F-actin-capping protein subunit alpha-2	CAPZA2	F-actin-capping protein subunit alpha-2	1	3	2	2	2	0	2	1	1	1	3	2	1	1	2	2	2	3	2	1	2	2	2	2	2	2	1	1	0	1	1	1	2	1	1	1	1	1	0	2	2	2
P47756	P47756	10	10	10	F-actin-capping protein subunit beta	CAPZB	F-actin-capping protein subunit beta	1	10	10	10	8	9	9	7	6	5	9	9	9	9	8	9	7	5	6	5	7	6	7	7	4	7	6	6	8	8	9	8	10	7	9	8	9	7	8	9	4	3
P47895	P47895	4	4	4	Aldehyde dehydrogenase family 1 member A3	ALDH1A3	Aldehyde dehydrogenase family 1 member A3	1	4	4	4	0	0	0	0	0	0	0	0	0	0	0	0	0	0	0	0	0	0	0	0	0	0	0	0	2	3	1	1	1	1	2	1	0	1	1	2	0	1
P47897	P47897	5	5	5	Glutamine--tRNA ligase	QARS	Glutamine--tRNA ligase	1	5	5	5	2	2	2	0	0	0	1	2	2	1	2	1	0	0	0	0	0	0	0	0	1	0	1	1	3	3	3	4	1	3	3	3	5	1	3	3	0	1
P48029	P48029	3	3	3	Sodium- and chloride-dependent creatine transporter 1	SLC6A8	Sodium- and chloride-dependent creatine transporter 1	1	3	3	3	3	2	2	1	1	3	3	3	3	3	2	3	0	0	0	0	0	0	0	0	0	0	0	1	2	3	2	1	2	2	1	1	2	2	2	3	1	1
P48047	P48047	6	6	6	ATP synthase subunit O, mitochondrial	ATP5O	ATP synthase subunit O, mitochondrial	1	6	6	6	0	0	0	0	0	0	0	0	0	0	0	0	0	0	0	0	0	0	0	0	0	0	0	0	0	0	0	0	0	0	0	1	0	0	0	0	6	6
P48059;Q7Z4I7	P48059	6;2	6;2	6;2	LIM and senescent cell antigen-like-containing domain protein 1	LIMS1	LIM and senescent cell antigen-like-containing domain protein 1	2	6	6	6	5	6	6	6	5	6	6	5	6	5	6	6	3	3	4	4	4	3	4	3	3	4	4	4	6	5	4	4	5	4	4	4	5	5	5	5	1	3
P48066	P48066	1	1	1	Sodium- and chloride-dependent GABA transporter 3	SLC6A11	Sodium- and chloride-dependent GABA transporter 3	1	1	1	1	1	1	1	1	1	1	1	1	1	1	1	1	0	0	0	0	0	0	0	0	0	0	0	0	0	0	0	0	0	0	0	0	0	0	0	0	0	0
P48147	P48147	3	3	3	Prolyl endopeptidase	PREP	Prolyl endopeptidase	1	3	3	3	0	0	0	0	0	0	1	2	1	0	1	1	0	0	0	0	0	0	0	0	0	0	0	0	0	0	0	1	0	0	1	0	1	0	1	1	0	1
P48426	P48426	5	5	3	Phosphatidylinositol 5-phosphate 4-kinase type-2 alpha	PIP4K2A	Phosphatidylinositol 5-phosphate 4-kinase type-2 alpha	1	5	5	3	4	5	5	4	4	5	5	5	5	5	5	4	2	2	2	3	1	2	2	2	2	2	2	3	0	0	0	0	0	0	0	0	0	0	0	0	0	0
P48509	P48509	5	5	5	CD151 antigen	CD151	CD151 antigen	1	5	5	5	5	5	5	4	5	5	5	5	5	5	5	5	3	4	5	5	5	5	5	5	4	5	4	5	5	4	5	5	4	4	4	4	4	5	2	3	3	3
P48643	P48643	23	23	23	T-complex protein 1 subunit epsilon	CCT5	T-complex protein 1 subunit epsilon	1	23	23	23	12	13	15	7	11	13	14	15	12	15	12	13	11	11	11	12	12	12	11	13	13	13	12	11	22	17	20	20	19	20	19	20	18	14	20	22	7	7
P48651	P48651	2	2	2	Phosphatidylserine synthase 1	PTDSS1	Phosphatidylserine synthase 1	1	2	2	2	0	0	0	0	0	0	0	1	0	0	0	0	2	2	2	2	0	2	2	1	2	2	2	2	2	0	0	0	0	0	0	1	0	0	0	0	2	1
P48729;Q8N752	P48729;Q8N752	5;3	5;3	5;3	Casein kinase I isoform alpha;Casein kinase I isoform alpha-like	CSNK1A1;CSNK1A1L	Casein kinase I isoform alpha;Casein kinase I isoform alpha-like	2	5	5	5	1	3	3	0	0	3	2	4	2	3	3	4	1	1	2	1	1	1	3	2	1	2	1	1	1	1	1	1	1	2	1	1	1	0	1	1	1	1
P48735	P48735	11	10	10	Isocitrate dehydrogenase [NADP], mitochondrial	IDH2	Isocitrate dehydrogenase [NADP], mitochondrial	1	11	10	10	1	1	1	1	1	1	0	1	1	1	0	1	1	1	1	1	2	1	2	1	1	1	1	1	2	1	1	1	1	0	1	2	1	1	2	1	2	3
P48739;Q00169	P48739	5;1	5;1	5;1	Phosphatidylinositol transfer protein beta isoform	PITPNB	Phosphatidylinositol transfer protein beta isoform	2	5	5	5	3	3	4	3	3	3	4	4	4	3	4	3	0	0	0	0	0	0	0	0	1	0	0	1	0	0	0	0	0	0	0	0	0	0	0	0	0	0
P48960	P48960	2	2	2	CD97 antigen;CD97 antigen subunit alpha;CD97 antigen subunit beta	CD97	Adhesion G protein-coupled receptor E5	1	2	2	2	1	1	0	0	0	0	0	0	0	0	0	0	0	0	0	1	0	0	0	0	0	1	0	0	0	1	1	2	0	0	1	0	1	1	1	1	0	0
P49006	P49006	10	9	9	MARCKS-related protein	MARCKSL1	MARCKS-related protein	1	10	9	9	7	8	8	7	8	7	8	8	8	7	8	9	4	3	3	3	4	4	3	3	4	4	1	3	0	1	1	0	1	1	1	0	1	1	1	1	0	0
P49023	P49023	4	4	4	Paxillin	PXN	Paxillin	1	4	4	4	0	1	0	0	0	0	1	3	2	2	0	1	0	0	0	0	0	1	1	0	0	1	1	1	0	0	0	0	0	0	0	0	0	0	0	0	0	0
P49189	P49189	9	9	9	4-trimethylaminobutyraldehyde dehydrogenase	ALDH9A1	4-trimethylaminobutyraldehyde dehydrogenase	1	9	9	9	5	6	4	4	3	3	6	4	3	3	6	5	2	2	1	2	3	2	2	2	2	2	1	1	1	2	2	0	0	1	1	0	1	0	2	1	3	0
P49207	P49207	3	3	3	60S ribosomal protein L34	RPL34	60S ribosomal protein L34	1	3	3	3	0	2	2	0	1	1	2	2	2	1	2	2	3	3	3	3	3	3	3	3	3	2	2	3	2	1	0	1	1	1	1	2	0	1	2	1	1	1
P49257	P49257	18	18	18	Protein ERGIC-53	LMAN1	Protein ERGIC-53	1	18	18	18	9	13	11	8	11	10	11	12	9	9	11	10	16	15	15	16	17	16	16	15	16	16	16	15	13	12	13	9	13	12	12	14	13	15	12	13	7	8
P49327	P49327	111	111	111	Fatty acid synthase;[Acyl-carrier-protein] S-acetyltransferase;[Acyl-carrier-protein] S-malonyltransferase;3-oxoacyl-[acyl-carrier-protein] synthase;3-oxoacyl-[acyl-carrier-protein] reductase;3-hydroxyacyl-[acyl-carrier-protein] dehydratase;Enoyl-[acyl-carrier-protein] reductase;Oleoyl-[acyl-carrier-protein] hydrolase	FASN	Fatty acid synthase	1	111	111	111	33	49	36	9	11	21	47	51	48	36	43	34	79	72	81	78	90	78	85	84	84	93	88	70	94	100	97	101	94	99	96	97	93	82	101	95	32	33
P49354	P49354	2	2	2	Protein farnesyltransferase/geranylgeranyltransferase type-1 subunit alpha	FNTA	Protein farnesyltransferase/geranylgeranyltransferase type-1 subunit alpha	1	2	2	2	2	0	2	0	0	2	1	1	1	1	1	1	0	0	0	0	0	0	0	0	0	0	0	0	0	0	1	1	2	2	1	2	1	1	1	1	0	1
P49368	P49368	27	27	27	T-complex protein 1 subunit gamma	CCT3	T-complex protein 1 subunit gamma	1	27	27	27	9	15	16	7	10	9	17	18	11	12	13	11	16	16	17	17	17	15	17	18	15	16	17	14	19	20	22	21	22	21	18	21	20	16	20	20	8	9
P49411	P49411	15	15	15	Elongation factor Tu, mitochondrial	TUFM	Elongation factor Tu, mitochondrial	1	15	15	15	1	1	0	0	0	0	1	1	0	0	0	0	0	0	0	2	1	1	0	0	0	0	1	0	1	1	0	0	1	1	0	1	2	0	0	0	14	13
P49419	P49419	4	4	4	Alpha-aminoadipic semialdehyde dehydrogenase	ALDH7A1	Alpha-aminoadipic semialdehyde dehydrogenase	1	4	4	4	1	1	2	1	0	2	2	2	1	2	2	2	1	0	0	0	1	0	0	1	0	1	0	0	2	1	2	1	1	0	1	0	1	0	1	2	3	1
P49448;A6NF36	P49448	13;1	1;0	1;0	Glutamate dehydrogenase 2, mitochondrial	GLUD2	Glutamate dehydrogenase 2, mitochondrial	2	13	1	1	0	0	0	0	0	1	1	2	2	1	1	0	1	1	0	0	0	0	1	0	0	1	1	0	1	2	1	1	1	1	1	2	2	2	1	1	12	11
P49454	P49454	4	4	4	Centromere protein F	CENPF	Centromere protein F	1	4	4	4	1	0	1	1	1	1	1	1	1	1	1	1	1	2	1	2	1	1	1	1	1	3	2	1	0	0	0	0	1	1	1	0	0	0	1	1	0	0
P49458	P49458	2	2	2	Signal recognition particle 9 kDa protein	SRP9	Signal recognition particle 9 kDa protein	1	2	2	2	2	1	2	1	2	2	2	2	2	1	2	2	2	0	0	0	0	0	0	0	1	0	0	0	0	0	0	0	0	0	0	0	0	0	0	0	0	0
P49588	P49588	13	13	13	Alanine--tRNA ligase, cytoplasmic	AARS	Alanine--tRNA ligase, cytoplasmic	1	13	13	13	5	6	7	2	2	5	9	8	8	8	7	6	3	0	1	3	3	1	3	2	2	3	0	2	2	5	3	5	4	5	6	3	6	3	5	2	1	1
P49591	P49591	6	6	6	Serine--tRNA ligase, cytoplasmic	SARS	Serine--tRNA ligase, cytoplasmic	1	6	6	6	5	6	5	5	4	5	5	5	6	6	5	6	2	2	4	4	4	4	4	4	3	4	4	3	4	2	2	2	3	3	2	0	1	0	1	4	0	1
P49711;Q8NI51	P49711	3;1	3;1	3;1	Transcriptional repressor CTCF	CTCF	Transcriptional repressor CTCF	2	3	3	3	0	1	0	0	0	0	1	0	0	0	0	0	3	0	1	1	1	1	0	1	1	1	1	2	0	0	0	0	1	0	0	0	0	0	0	0	0	0
P49720	P49720	7	7	7	Proteasome subunit beta type-3	PSMB3	Proteasome subunit beta type-3	1	7	7	7	3	2	2	2	3	3	3	3	3	3	3	3	3	2	3	4	4	3	4	4	5	4	3	3	6	5	5	5	4	4	5	5	4	1	5	5	3	1
P49721	P49721	9	9	9	Proteasome subunit beta type-2	PSMB2	Proteasome subunit beta type-2	1	9	9	9	6	4	4	5	4	4	8	6	4	2	5	4	4	4	4	5	4	3	5	5	4	4	3	3	7	6	4	8	6	6	8	7	5	2	6	5	1	2
P49748	P49748	12	12	12	Very long-chain specific acyl-CoA dehydrogenase, mitochondrial	ACADVL	Very long-chain specific acyl-CoA dehydrogenase, mitochondrial	1	12	12	12	0	0	0	0	0	0	0	0	0	1	0	0	1	0	0	1	0	1	0	0	0	0	0	0	1	0	0	0	0	0	0	0	0	0	0	0	11	10
P49755	P49755	13	13	13	Transmembrane emp24 domain-containing protein 10	TMED10	Transmembrane emp24 domain-containing protein 10	1	13	13	13	6	8	8	9	7	6	7	8	7	6	5	7	12	10	12	12	12	10	10	11	12	11	13	9	8	8	7	4	7	5	7	8	6	7	7	6	6	6
P49757	P49757	1	1	1	Protein numb homolog	NUMB	Protein numb homolog	1	1	1	1	0	1	0	0	0	1	1	1	0	1	0	1	0	0	0	0	0	0	0	0	0	0	0	0	0	0	0	0	0	0	0	0	0	0	0	0	0	0
P49768	P49768	4	4	2	Presenilin-1;Presenilin-1 NTF subunit;Presenilin-1 CTF subunit;Presenilin-1 CTF12	PSEN1	Presenilin-1	1	4	4	2	1	3	4	1	3	3	4	3	3	3	3	3	2	2	2	2	2	2	2	2	2	2	2	2	1	2	1	2	2	2	2	2	2	1	2	1	1	0
P49773	P49773	3	3	3	Histidine triad nucleotide-binding protein 1	HINT1	Histidine triad nucleotide-binding protein 1	1	3	3	3	2	2	2	2	2	2	2	2	2	2	2	2	2	1	1	2	2	2	2	1	1	2	2	2	1	1	1	1	1	1	1	1	1	1	1	1	1	2
P49821	P49821	6	6	6	NADH dehydrogenase [ubiquinone] flavoprotein 1, mitochondrial	NDUFV1	NADH dehydrogenase [ubiquinone] flavoprotein 1, mitochondrial	1	6	6	6	0	0	0	0	0	0	0	0	0	0	0	0	0	1	0	0	0	0	0	0	0	0	0	0	0	0	0	0	0	0	0	0	0	0	0	0	4	3
P50148	P50148	17	17	9	Guanine nucleotide-binding protein G(q) subunit alpha	GNAQ	Guanine nucleotide-binding protein G(q) subunit alpha	1	17	17	9	14	14	9	8	9	12	17	16	14	14	13	14	9	5	8	8	8	9	8	8	8	7	7	8	2	5	5	4	5	4	4	5	4	5	4	4	3	4
P50151	P50151	3	3	3	Guanine nucleotide-binding protein G(I)/G(S)/G(O) subunit gamma-10	GNG10	Guanine nucleotide-binding protein G(I)/G(S)/G(O) subunit gamma-10	1	3	3	3	2	2	3	2	2	3	3	3	2	3	3	3	2	1	2	2	2	2	1	1	1	1	2	2	0	0	0	0	0	0	0	0	0	0	0	0	0	0
P50213	P50213	8	8	8	Isocitrate dehydrogenase [NAD] subunit alpha, mitochondrial	IDH3A	Isocitrate dehydrogenase [NAD] subunit alpha, mitochondrial	1	8	8	8	0	0	0	1	0	0	0	0	1	1	0	1	0	0	0	0	0	0	0	0	0	0	0	0	0	1	0	1	0	1	0	0	1	0	2	0	7	6
P50395	P50395	29	29	20	Rab GDP dissociation inhibitor beta	GDI2	Rab GDP dissociation inhibitor beta	1	29	29	20	25	24	26	28	27	24	26	27	26	26	28	24	9	7	5	13	11	12	7	9	11	13	12	9	12	14	15	12	16	17	15	13	11	15	11	13	6	9
P50402	P50402	2	2	2	Emerin	EMD	Emerin	1	2	2	2	0	0	1	1	1	1	1	2	1	1	1	1	1	1	1	1	1	1	1	0	0	0	1	1	1	0	0	0	1	0	0	1	0	1	0	0	1	1
P50416	P50416	9	9	9	Carnitine O-palmitoyltransferase 1, liver isoform	CPT1A	Carnitine O-palmitoyltransferase 1, liver isoform	1	9	9	9	0	0	0	1	0	0	0	1	0	0	0	0	6	4	6	6	7	8	3	4	4	7	5	5	0	0	0	0	0	1	0	1	0	3	0	1	2	3
P50443	P50443	12	12	12	Sulfate transporter	SLC26A2	Sulfate transporter	1	12	12	12	4	3	3	2	1	4	5	5	3	5	4	3	8	6	6	7	8	7	7	7	8	8	6	7	5	7	7	6	8	5	5	6	6	5	6	6	7	6
P50454	P50454	18	18	18	Serpin H1	SERPINH1	Serpin H1	1	18	18	18	7	9	13	6	5	7	9	11	10	9	10	9	15	15	14	16	15	14	15	16	15	15	15	14	15	13	15	13	15	14	12	15	11	15	12	13	14	12
P50502;Q8NFI4;Q8IZP2	P50502;Q8NFI4;Q8IZP2	9;7;5	9;7;5	9;7;5	Hsc70-interacting protein;Putative protein FAM10A5;Putative protein FAM10A4	ST13;ST13P5;ST13P4	Hsc70-interacting protein;Putative protein FAM10A5;Putative protein FAM10A4	3	9	9	9	8	8	8	8	8	8	8	8	8	8	9	6	4	4	4	5	6	4	4	2	3	3	2	3	5	5	6	4	5	6	4	5	5	4	3	4	1	2
P50552	P50552	4	4	4	Vasodilator-stimulated phosphoprotein	VASP	Vasodilator-stimulated phosphoprotein	1	4	4	4	4	4	4	4	4	4	3	4	4	3	2	3	1	1	1	3	3	2	2	1	1	3	2	2	0	1	0	1	1	1	0	1	1	1	1	0	1	1
P50570;Q9UQ16	P50570	6;1	6;1	6;1	Dynamin-2	DNM2	Dynamin-2	2	6	6	6	0	1	1	0	0	0	4	3	2	2	1	3	1	0	0	1	2	0	1	1	1	2	1	0	0	2	1	2	1	1	1	1	1	0	1	1	0	0
P50851	P50851	2	2	1	Lipopolysaccharide-responsive and beige-like anchor protein	LRBA	Lipopolysaccharide-responsive and beige-like anchor protein	1	2	2	1	0	0	0	0	1	0	0	0	0	0	0	0	0	0	0	0	0	0	0	0	0	0	0	0	1	1	1	1	0	1	1	1	1	0	2	1	0	0
P50895	P50895	2	2	2	Basal cell adhesion molecule	BCAM	Basal cell adhesion molecule	1	2	2	2	1	1	1	1	0	1	1	1	1	1	1	1	0	0	0	0	1	0	0	0	1	1	0	0	0	0	0	0	0	0	0	0	0	0	0	0	0	0
P50897	P50897	1	1	1	Palmitoyl-protein thioesterase 1	PPT1	Palmitoyl-protein thioesterase 1	1	1	1	1	0	0	0	0	0	0	0	0	0	0	0	0	0	1	0	0	0	0	0	1	0	0	0	0	0	0	0	0	0	0	0	0	0	0	0	0	0	0
P50914	P50914	5	5	5	60S ribosomal protein L14	RPL14	60S ribosomal protein L14	1	5	5	5	4	4	3	3	3	3	4	3	3	2	3	3	5	3	4	5	3	2	2	5	4	5	4	3	5	5	5	4	4	4	3	5	4	4	4	4	4	4
P50990	P50990	31	31	31	T-complex protein 1 subunit theta	CCT8	T-complex protein 1 subunit theta	1	31	31	31	17	17	20	9	13	17	19	21	18	17	19	17	11	9	10	14	16	12	12	15	14	17	16	10	26	28	27	28	22	22	25	24	22	15	22	23	8	6
P50991	P50991	19	19	19	T-complex protein 1 subunit delta	CCT4	T-complex protein 1 subunit delta	1	19	19	19	12	15	15	9	13	15	15	16	17	16	13	14	10	9	8	10	12	11	10	12	10	10	12	7	14	18	16	16	17	13	16	16	17	13	16	14	6	6
P50995;P27216	P50995	20;1	20;1	20;1	Annexin A11	ANXA11	Annexin A11	2	20	20	20	16	18	18	16	17	17	17	19	17	17	18	17	15	15	14	13	14	17	14	14	13	16	16	17	14	15	15	15	15	14	13	16	14	16	13	15	12	13
P51148	P51148	10	10	7	Ras-related protein Rab-5C	RAB5C	Ras-related protein Rab-5C	1	10	10	7	10	9	10	9	9	9	9	10	9	10	10	10	5	5	5	5	6	6	6	6	7	6	6	5	4	5	5	5	7	5	5	5	5	6	6	5	3	4
P51149	P51149	15	15	15	Ras-related protein Rab-7a	RAB7A	Ras-related protein Rab-7a	1	15	15	15	12	13	12	12	11	13	13	13	12	13	13	10	10	10	11	12	11	10	9	9	12	12	10	10	5	5	4	6	7	5	6	6	4	6	7	4	4	3
P51151;Q9NP90	P51151	4;1	4;1	4;1	Ras-related protein Rab-9A	RAB9A	Ras-related protein Rab-9A	2	4	4	4	3	4	2	0	1	2	1	2	1	4	0	4	1	0	1	1	1	0	1	0	0	0	0	0	0	0	0	0	1	0	0	0	1	1	2	1	0	0
P51153	P51153	7	4	4	Ras-related protein Rab-13	RAB13	Ras-related protein Rab-13	1	7	4	4	4	4	4	3	4	3	5	5	5	5	4	4	7	5	7	6	6	7	6	6	5	6	6	4	1	4	3	5	3	4	4	4	3	2	5	4	3	2
P51531;P51532	P51531;P51532	3;3	3;3	3;3	Probable global transcription activator SNF2L2;Transcription activator BRG1	SMARCA2;SMARCA4	Probable global transcription activator SNF2L2;Transcription activator BRG1	2	3	3	3	0	1	0	0	0	0	1	1	1	0	0	0	2	2	2	2	3	2	2	3	1	2	3	2	0	0	0	0	0	0	0	0	0	0	0	0	1	1
P51570	P51570	4	4	4	Galactokinase	GALK1	Galactokinase	1	4	4	4	2	2	2	3	3	3	3	2	2	3	3	2	2	3	3	2	3	3	2	3	2	3	3	3	1	0	0	0	0	0	0	0	0	0	0	0	1	1
P51571	P51571	6	6	6	Translocon-associated protein subunit delta	SSR4	Translocon-associated protein subunit delta	1	6	6	6	2	2	2	3	3	2	0	3	3	2	2	4	6	4	4	6	6	6	4	6	3	5	5	4	4	5	4	4	4	4	3	4	2	4	5	3	6	5
P51572	P51572	14	14	14	B-cell receptor-associated protein 31	BCAP31	B-cell receptor-associated protein 31	1	14	14	14	6	7	6	5	6	7	8	7	6	7	4	5	10	10	10	10	9	10	11	9	9	10	10	8	8	8	7	8	8	8	8	8	8	8	8	6	5	6
P51589	P51589	1	1	1	Cytochrome P450 2J2	CYP2J2	Cytochrome P450 2J2	1	1	1	1	0	0	0	0	0	0	0	0	0	0	0	0	0	0	0	0	0	0	0	0	0	0	0	0	0	0	0	1	0	0	0	0	0	0	0	0	0	0
P51648;P48448;P30838;P43353	P51648	8;1;1;1	8;1;1;1	8;1;1;1	Fatty aldehyde dehydrogenase	ALDH3A2	Aldehyde dehydrogenase family 3 member A2	4	8	8	8	0	1	0	0	0	0	0	1	0	0	0	0	2	2	1	2	3	2	3	3	2	2	3	1	5	5	4	4	4	2	5	4	6	5	5	5	4	4
P51654	P51654	2	2	2	Glypican-3;Secreted glypican-3	GPC3	Glypican-3	1	2	2	2	1	1	1	1	1	1	1	1	1	1	1	1	1	0	0	0	0	0	0	0	0	0	0	0	1	1	1	1	1	1	1	1	1	1	1	1	0	0
P51659	P51659	25	25	25	Peroxisomal multifunctional enzyme type 2;(3R)-hydroxyacyl-CoA dehydrogenase;Enoyl-CoA hydratase 2	HSD17B4	Peroxisomal multifunctional enzyme type 2	1	25	25	25	2	3	2	2	0	1	6	8	4	3	4	5	13	9	10	16	17	15	11	8	12	13	12	9	6	3	4	3	5	4	3	10	4	8	6	9	20	20
P51665	P51665	7	7	7	26S proteasome non-ATPase regulatory subunit 7	PSMD7	26S proteasome non-ATPase regulatory subunit 7	1	7	7	7	2	3	3	1	4	2	3	4	4	3	5	3	1	0	2	1	3	1	2	2	1	1	1	0	4	3	6	6	5	4	4	1	3	0	2	2	1	1
P51674	P51674	6	6	6	Neuronal membrane glycoprotein M6-a	GPM6A	Neuronal membrane glycoprotein M6-a	1	6	6	6	6	5	6	5	5	5	6	6	6	5	6	6	1	1	2	3	3	3	2	2	0	2	2	2	0	1	1	0	0	0	0	0	0	0	0	0	0	0
P51688	P51688	3	3	3	N-sulphoglucosamine sulphohydrolase	SGSH	N-sulphoglucosamine sulphohydrolase	1	3	3	3	0	0	0	1	0	0	0	1	0	0	0	0	0	0	0	0	0	0	0	0	0	0	0	0	0	0	0	0	0	0	0	0	0	0	0	0	1	0
P51809	P51809	5	5	5	Vesicle-associated membrane protein 7	VAMP7	Vesicle-associated membrane protein 7	1	5	5	5	3	4	2	2	2	2	3	3	4	2	3	3	4	3	3	4	4	3	5	4	4	4	4	3	1	2	0	2	1	2	1	2	1	1	1	2	0	1
P51884	P51884	1	1	1	Lumican	LUM	Lumican	1	1	1	1	0	0	0	0	0	0	0	0	0	0	0	0	0	0	0	0	0	0	0	0	0	0	0	0	0	1	0	0	0	1	0	0	1	0	0	0	0	0
P51970	P51970	2	2	2	NADH dehydrogenase [ubiquinone] 1 alpha subcomplex subunit 8	NDUFA8	NADH dehydrogenase [ubiquinone] 1 alpha subcomplex subunit 8	1	2	2	2	0	0	0	0	0	0	1	0	0	0	0	1	0	0	0	0	0	0	0	0	0	0	0	0	0	0	0	0	0	0	0	0	0	0	0	0	2	2
P52209	P52209	13	13	13	6-phosphogluconate dehydrogenase, decarboxylating	PGD	6-phosphogluconate dehydrogenase, decarboxylating	1	13	13	13	8	10	10	5	6	8	9	10	9	8	9	8	3	2	2	8	6	4	6	4	4	7	5	5	8	7	8	9	6	6	7	10	7	6	7	8	5	5
P52272	P52272	8	8	8	Heterogeneous nuclear ribonucleoprotein M	HNRNPM	Heterogeneous nuclear ribonucleoprotein M	1	8	8	8	4	4	5	2	3	2	7	4	4	4	6	6	5	3	4	4	5	3	3	4	4	3	4	1	0	1	0	1	0	0	1	1	0	1	1	1	0	0
P52292	P52292	7	7	7	Importin subunit alpha-1	KPNA2	Importin subunit alpha-1	1	7	7	7	6	4	5	2	2	2	6	6	5	6	6	3	3	2	3	3	3	3	3	3	3	3	3	2	0	0	0	0	0	0	0	0	0	0	0	0	0	0
P52434	P52434	3	3	3	DNA-directed RNA polymerases I, II, and III subunit RPABC3	POLR2H	DNA-directed RNA polymerases I, II, and III subunit RPABC3	1	3	3	3	1	2	2	0	1	1	2	2	1	2	2	2	3	1	2	2	3	2	2	2	3	1	2	2	2	2	2	1	1	2	1	2	1	2	0	1	0	1
P52565	P52565	8	8	8	Rho GDP-dissociation inhibitor 1	ARHGDIA	Rho GDP-dissociation inhibitor 1	1	8	8	8	6	5	5	7	4	5	5	5	5	4	5	5	2	1	1	2	2	2	2	1	2	2	3	2	0	1	0	1	1	0	0	0	0	1	0	1	2	2
P52569	P52569	6	5	5	Cationic amino acid transporter 2	SLC7A2	Cationic amino acid transporter 2	1	6	5	5	2	2	4	1	2	3	3	3	3	4	4	2	2	2	2	3	5	3	2	3	3	5	4	2	1	1	1	1	1	1	1	1	1	1	1	1	0	0
P52701	P52701	3	3	3	DNA mismatch repair protein Msh6	MSH6	DNA mismatch repair protein Msh6	1	3	3	3	1	1	0	0	0	0	0	1	0	0	0	0	3	1	1	1	1	1	1	1	1	2	2	2	0	0	0	1	1	0	0	0	0	0	0	0	0	0
P52815	P52815	4	4	4	39S ribosomal protein L12, mitochondrial	MRPL12	39S ribosomal protein L12, mitochondrial	1	4	4	4	0	0	0	0	0	0	0	0	0	0	0	0	0	0	0	0	0	0	0	0	0	0	0	0	0	0	0	0	0	0	0	0	0	0	0	0	2	2
P52895;Q04828;P17516	P52895;Q04828	5;5;1	5;5;1	3;3;0	Aldo-keto reductase family 1 member C2;Aldo-keto reductase family 1 member C1	AKR1C2;AKR1C1	Aldo-keto reductase family 1 member C2;Aldo-keto reductase family 1 member C1	3	5	5	3	1	1	1	1	1	1	1	1	1	1	1	1	1	1	1	0	1	0	1	1	0	0	1	1	4	1	4	2	1	1	2	3	2	3	3	1	2	1
P52907	P52907	10	10	9	F-actin-capping protein subunit alpha-1	CAPZA1	F-actin-capping protein subunit alpha-1	1	10	10	9	7	5	8	9	8	8	10	8	6	9	10	8	3	3	3	3	4	3	3	3	4	3	3	3	4	5	3	5	5	7	6	5	6	4	3	7	4	3
P53004	P53004	3	3	3	Biliverdin reductase A	BLVRA	Biliverdin reductase A	1	3	3	3	1	2	1	0	1	1	0	2	1	1	3	1	2	1	1	2	2	1	1	1	0	1	1	1	1	1	2	1	3	2	2	2	2	2	2	2	0	2
P53007	P53007	3	3	3	Tricarboxylate transport protein, mitochondrial	SLC25A1	Tricarboxylate transport protein, mitochondrial	1	3	3	3	0	0	0	0	0	1	0	0	0	0	1	0	0	0	0	1	0	0	0	0	0	1	0	0	0	0	0	0	0	0	0	0	0	0	0	0	2	2
P53041	P53041	3	3	3	Serine/threonine-protein phosphatase 5	PPP5C	Serine/threonine-protein phosphatase 5	1	3	3	3	2	2	1	1	1	1	3	3	3	2	2	2	0	0	0	0	0	0	0	0	0	1	0	0	0	0	0	0	0	0	0	0	0	0	0	0	0	0
P53367	P53367	2	2	2	Arfaptin-1	ARFIP1	Arfaptin-1	1	2	2	2	1	1	1	1	1	1	1	1	1	1	1	1	2	2	2	2	2	2	2	2	2	2	2	2	0	0	0	0	0	0	0	0	0	0	0	0	2	2
P53396	P53396	34	34	34	ATP-citrate synthase	ACLY	ATP-citrate synthase	1	34	34	34	5	13	8	2	7	11	15	13	15	10	9	9	14	16	18	18	22	18	18	19	18	22	20	16	22	26	25	26	23	26	26	23	25	22	23	25	7	10
P53597	P53597	3	3	3	Succinyl-CoA ligase [ADP/GDP-forming] subunit alpha, mitochondrial	SUCLG1	Succinate--CoA ligase [ADP/GDP-forming] subunit alpha, mitochondrial	1	3	3	3	0	0	0	0	0	0	0	0	0	0	0	0	0	0	0	0	0	0	0	0	0	0	0	0	0	0	0	0	0	0	0	0	0	0	0	0	2	3
P53618	P53618	7	7	7	Coatomer subunit beta	COPB1	Coatomer subunit beta	1	7	7	7	2	3	1	1	1	2	4	4	2	1	1	2	3	2	3	3	2	3	2	1	1	3	2	3	3	4	6	5	2	4	5	3	3	1	4	4	3	0
P53621	P53621	18	18	18	Coatomer subunit alpha;Xenin;Proxenin	COPA	Coatomer subunit alpha	1	18	18	18	4	3	3	0	1	3	5	6	4	2	5	6	4	4	4	6	6	5	3	4	4	4	4	4	9	11	11	11	12	12	12	13	13	8	12	13	3	1
P53634	P53634	7	7	7	Dipeptidyl peptidase 1;Dipeptidyl peptidase 1 exclusion domain chain;Dipeptidyl peptidase 1 heavy chain;Dipeptidyl peptidase 1 light chain	CTSC	Dipeptidyl peptidase 1	1	7	7	7	1	1	1	3	1	0	2	2	0	1	2	2	2	1	1	1	1	1	1	1	1	1	1	1	3	5	4	5	4	2	6	4	4	2	3	3	6	6
P53708	P53708	4	4	4	Integrin alpha-8;Integrin alpha-8 heavy chain;Integrin alpha-8 light chain	ITGA8	Integrin alpha-8	1	4	4	4	3	1	3	2	2	2	2	1	2	2	2	1	0	0	0	0	0	0	0	0	0	0	0	0	0	1	0	0	0	0	0	0	0	0	0	1	1	0
P53794	P53794	8	8	8	Sodium/myo-inositol cotransporter	SLC5A3	Sodium/myo-inositol cotransporter	1	8	8	8	4	7	7	2	4	4	5	7	5	6	5	6	2	1	1	3	3	1	1	2	2	2	1	1	0	0	1	1	1	3	2	2	1	3	1	2	0	0
P53985	P53985	14	14	14	Monocarboxylate transporter 1	SLC16A1	Monocarboxylate transporter 1	1	14	14	14	11	14	13	13	13	14	14	14	12	13	12	12	4	5	4	7	5	6	7	3	6	6	5	5	12	11	13	12	13	13	12	12	10	14	11	10	10	10
P53990	P53990	16	16	16	IST1 homolog	IST1	IST1 homolog	1	16	16	16	15	14	16	14	14	15	16	16	16	15	16	16	8	7	8	11	11	9	9	10	6	10	9	6	3	9	10	7	10	8	9	6	8	6	9	7	0	2
P54105	P54105	1	1	1	Methylosome subunit pICln	CLNS1A	Methylosome subunit pICln	1	1	1	1	0	0	0	0	0	0	0	0	0	0	0	0	0	0	0	0	0	0	0	0	0	0	0	0	0	1	0	0	0	0	0	0	0	0	0	0	0	0
P54136	P54136	11	11	11	Arginine--tRNA ligase, cytoplasmic	RARS	Arginine--tRNA ligase, cytoplasmic	1	11	11	11	2	8	3	1	1	3	6	4	4	6	4	4	4	3	3	4	4	2	4	3	5	4	3	3	6	7	10	7	8	9	9	5	7	4	7	8	2	3
P54289	P54289	19	19	18	Voltage-dependent calcium channel subunit alpha-2/delta-1;Voltage-dependent calcium channel subunit alpha-2-1;Voltage-dependent calcium channel subunit delta-1	CACNA2D1	Voltage-dependent calcium channel subunit alpha-2/delta-1	1	19	19	18	12	14	15	11	11	11	13	13	15	14	14	14	5	1	4	6	7	2	5	5	4	5	4	5	2	2	2	1	2	2	1	1	1	2	1	1	2	3
P54577	P54577	11	11	11	Tyrosine--tRNA ligase, cytoplasmic;Tyrosine--tRNA ligase, cytoplasmic, N-terminally processed	YARS	Tyrosine--tRNA ligase, cytoplasmic	1	11	11	11	6	7	6	4	2	6	7	7	7	7	4	5	0	0	0	0	0	0	0	0	0	0	0	0	1	1	2	1	2	1	2	1	2	0	3	3	1	1
P54619	P54619	2	2	2	5-AMP-activated protein kinase subunit gamma-1	PRKAG1	5-AMP-activated protein kinase subunit gamma-1	1	2	2	2	0	0	0	0	0	0	0	0	0	0	0	0	1	0	0	1	0	0	0	0	0	0	1	0	0	0	0	0	0	0	0	0	0	0	0	0	0	0
P54707;REV__Q15772	P54707	5;1	2;1	2;1	Potassium-transporting ATPase alpha chain 2	ATP12A	Potassium-transporting ATPase alpha chain 2	2	5	2	2	3	3	3	3	3	3	3	3	3	3	4	3	2	3	3	3	3	3	3	3	2	3	3	3	4	5	4	5	5	5	5	5	5	5	5	4	3	3
P54709	P54709	16	16	16	Sodium/potassium-transporting ATPase subunit beta-3	ATP1B3	Sodium/potassium-transporting ATPase subunit beta-3	1	16	16	16	10	11	10	8	9	8	10	11	10	9	10	12	9	10	8	8	10	8	9	10	7	8	11	7	9	7	7	10	8	9	9	9	7	10	9	9	7	8
P54727;P54725	P54727	4;1	4;1	4;1	UV excision repair protein RAD23 homolog B	RAD23B	UV excision repair protein RAD23 homolog B	2	4	4	4	3	3	4	3	2	3	3	3	4	4	4	4	2	1	1	1	3	2	1	2	1	2	1	1	0	0	0	0	0	0	2	0	0	0	1	0	0	1
P54753	P54753	8	3	3	Ephrin type-B receptor 3	EPHB3	Ephrin type-B receptor 3	1	8	3	3	2	5	4	1	3	4	3	5	5	4	6	4	5	4	4	5	6	6	4	4	4	5	5	6	3	4	4	3	4	4	4	4	4	4	3	3	1	2
P54756;P29320;P29322	P54756;P29320;P29322	4;2;2	1;1;0	0;0;0	Ephrin type-A receptor 5;Ephrin type-A receptor 3;Ephrin type-A receptor 8	EPHA5;EPHA3;EPHA8	Ephrin type-A receptor 5;Ephrin type-A receptor 3;Ephrin type-A receptor 8	3	4	1	0	3	3	4	2	3	3	3	4	3	3	3	4	1	1	2	1	2	3	2	1	2	3	2	2	0	1	1	2	1	1	1	1	1	1	1	1	0	0
P54760	P54760	11	9	5	Ephrin type-B receptor 4	EPHB4	Ephrin type-B receptor 4	1	11	9	5	2	7	5	1	2	5	5	8	6	5	6	6	6	7	8	8	10	9	9	6	8	10	8	9	3	4	4	4	5	4	4	4	4	4	3	3	2	2
P54764	P54764	3	1	1	Ephrin type-A receptor 4	EPHA4	Ephrin type-A receptor 4	1	3	1	1	2	3	2	0	1	2	3	3	1	2	3	2	0	1	1	2	1	1	0	0	0	1	1	1	1	1	1	1	1	1	1	1	1	1	0	0	1	1
P54802	P54802	11	11	11	Alpha-N-acetylglucosaminidase;Alpha-N-acetylglucosaminidase 82 kDa form;Alpha-N-acetylglucosaminidase 77 kDa form	NAGLU	Alpha-N-acetylglucosaminidase	1	11	11	11	0	0	0	0	0	0	0	0	0	0	0	0	4	0	1	1	0	1	1	3	0	1	0	1	0	0	0	0	0	0	0	0	0	0	0	0	0	0
P54819	P54819	7	7	7	Adenylate kinase 2, mitochondrial;Adenylate kinase 2, mitochondrial, N-terminally processed	AK2	Adenylate kinase 2, mitochondrial	1	7	7	7	0	0	0	0	0	0	1	1	0	0	0	1	0	0	0	0	0	0	0	0	0	0	0	0	0	0	0	0	0	1	0	0	0	0	0	0	3	2
P54852	P54852	2	2	2	Epithelial membrane protein 3	EMP3	Epithelial membrane protein 3	1	2	2	2	0	0	0	0	0	0	0	0	0	0	0	0	0	0	0	0	0	0	0	0	0	0	0	0	0	1	0	0	0	0	1	1	1	1	0	1	1	1
P54886	P54886	8	8	8	Delta-1-pyrroline-5-carboxylate synthase;Glutamate 5-kinase;Gamma-glutamyl phosphate reductase	ALDH18A1	Delta-1-pyrroline-5-carboxylate synthase	1	8	8	8	0	0	1	0	0	0	2	0	1	1	0	1	2	2	1	2	1	1	2	1	2	1	1	1	0	0	0	0	0	0	0	0	0	0	0	0	5	5
P54920;Q9H115	P54920	11;2	11;2	11;2	Alpha-soluble NSF attachment protein	NAPA	Alpha-soluble NSF attachment protein	2	11	11	11	5	4	7	2	4	5	5	7	7	5	5	6	1	2	2	3	2	2	3	2	2	2	4	1	3	0	5	5	2	3	4	3	4	2	4	4	2	2
P55011;Q13621	P55011	18;1	18;1	18;1	Solute carrier family 12 member 2	SLC12A2	Solute carrier family 12 member 2	2	18	18	18	15	15	15	10	12	13	16	14	15	14	14	15	4	3	4	5	4	5	3	2	3	3	3	4	4	3	5	5	6	6	6	4	5	8	5	7	2	1
P55058	P55058	2	2	2	Phospholipid transfer protein	PLTP	Phospholipid transfer protein	1	2	2	2	0	0	0	0	0	0	0	0	0	1	0	0	1	0	0	0	0	0	0	0	0	0	0	0	2	1	1	2	1	2	2	1	2	1	2	2	1	2
P55060	P55060	6	6	6	Exportin-2	CSE1L	Exportin-2	1	6	6	6	3	2	1	0	0	0	3	3	3	2	2	1	2	0	1	2	1	1	1	1	2	1	1	0	0	0	0	0	0	1	1	0	0	0	0	1	0	0
P55072	P55072	32	32	32	Transitional endoplasmic reticulum ATPase	VCP	Transitional endoplasmic reticulum ATPase	1	32	32	32	19	20	21	16	18	18	20	24	21	19	19	22	19	18	16	20	21	18	17	17	14	19	21	17	26	25	26	25	24	25	23	25	25	21	25	22	4	9
P55083	P55083	2	2	2	Microfibril-associated glycoprotein 4	MFAP4	Microfibril-associated glycoprotein 4	1	2	2	2	2	2	2	1	1	1	1	2	2	2	1	0	1	0	0	1	1	1	1	1	1	1	1	0	1	1	1	0	1	1	0	1	1	1	1	1	0	0
P55084	P55084	7	7	7	Trifunctional enzyme subunit beta, mitochondrial;3-ketoacyl-CoA thiolase	HADHB	Trifunctional enzyme subunit beta, mitochondrial	1	7	7	7	1	0	1	1	0	0	0	0	0	0	1	0	0	0	0	0	0	0	0	0	0	0	0	0	1	0	0	0	0	0	0	0	0	0	0	0	4	3
P55145	P55145	8	8	8	Mesencephalic astrocyte-derived neurotrophic factor	MANF	Mesencephalic astrocyte-derived neurotrophic factor	1	8	8	8	4	2	4	4	4	4	6	4	0	3	5	4	2	1	0	2	0	2	2	1	1	1	0	1	7	5	7	4	4	3	5	5	6	7	4	5	7	8
P55196	P55196	17	17	17	Afadin	MLLT4	Afadin	1	17	17	17	9	12	10	2	4	7	14	12	8	10	11	11	0	0	0	0	0	0	0	0	1	0	0	0	0	1	3	2	1	0	1	2	0	2	1	1	0	0
P55209	P55209	7	6	6	Nucleosome assembly protein 1-like 1	NAP1L1	Nucleosome assembly protein 1-like 1	1	7	6	6	7	6	6	6	6	7	6	7	7	6	7	7	6	6	6	7	7	7	7	7	7	6	6	7	5	6	5	4	5	6	5	6	5	3	5	5	3	4
P55263	P55263	5	5	5	Adenosine kinase	ADK	Adenosine kinase	1	5	5	5	3	3	2	2	2	2	3	3	2	2	3	2	2	2	3	4	4	2	2	3	3	4	2	3	1	0	0	1	0	0	1	1	0	0	1	0	0	0
P55268	P55268	39	39	39	Laminin subunit beta-2	LAMB2	Laminin subunit beta-2	1	39	39	39	20	36	24	12	10	9	23	18	14	11	12	10	7	7	7	9	9	11	4	7	22	15	14	13	2	3	1	1	1	1	1	4	1	2	2	1	0	0
P55290	P55290	2	2	2	Cadherin-13	CDH13	Cadherin-13	1	2	2	2	0	0	0	0	0	0	0	0	0	0	0	0	0	0	0	0	0	0	0	0	0	0	0	0	0	1	1	0	1	1	1	1	2	0	0	1	0	0
P55735	P55735	3	3	3	Protein SEC13 homolog	SEC13	Protein SEC13 homolog	1	3	3	3	0	0	2	0	0	1	2	2	1	1	1	1	0	0	0	1	1	0	1	1	0	1	0	0	1	1	1	1	0	0	1	1	1	0	1	1	0	0
P55786	P55786	16	16	11	Puromycin-sensitive aminopeptidase	NPEPPS	Puromycin-sensitive aminopeptidase	1	16	16	11	12	12	12	11	12	12	13	12	9	11	14	12	3	2	4	5	5	3	4	5	3	5	4	3	6	6	8	9	8	9	4	7	6	6	4	4	8	7
P55809	P55809	5	5	5	Succinyl-CoA:3-ketoacid coenzyme A transferase 1, mitochondrial	OXCT1	Succinyl-CoA:3-ketoacid coenzyme A transferase 1, mitochondrial	1	5	5	5	0	0	0	0	0	0	0	0	0	0	0	0	0	0	0	0	0	0	0	0	0	0	1	0	0	0	0	0	0	1	0	0	0	0	0	0	4	3
P55884	P55884	15	15	15	Eukaryotic translation initiation factor 3 subunit B	EIF3B	Eukaryotic translation initiation factor 3 subunit B	1	15	15	15	3	5	3	1	2	2	7	4	2	4	3	3	8	6	7	7	10	9	8	10	7	8	6	7	6	7	6	7	6	6	6	5	5	5	7	5	2	2
P56134	P56134	3	3	3	ATP synthase subunit f, mitochondrial	ATP5J2	ATP synthase subunit f, mitochondrial	1	3	3	3	0	0	0	0	0	0	0	0	0	0	0	1	0	0	0	1	1	0	0	0	0	0	0	0	0	0	0	0	0	0	0	0	0	0	0	0	2	2
P56159;O00451	P56159	9;1	9;1	9;1	GDNF family receptor alpha-1	GFRA1	GDNF family receptor alpha-1	2	9	9	9	0	0	0	0	0	0	0	0	0	0	0	0	7	7	7	8	7	8	8	8	5	7	6	8	0	0	0	0	0	0	0	0	0	0	0	0	0	0
P56182	P56182	3	3	3	Ribosomal RNA processing protein 1 homolog A	RRP1	Ribosomal RNA processing protein 1 homolog A	1	3	3	3	1	1	1	1	1	1	1	1	1	1	1	1	3	2	3	2	2	1	1	2	1	1	2	1	0	0	0	0	1	0	0	1	0	0	0	0	0	1
P56192	P56192	7	7	7	Methionine--tRNA ligase, cytoplasmic	MARS	Methionine--tRNA ligase, cytoplasmic	1	7	7	7	1	6	3	1	1	3	4	3	5	3	5	5	2	2	1	2	1	1	1	2	0	2	2	1	3	6	3	3	3	3	3	4	4	2	2	3	0	0
P56199	P56199	7	7	7	Integrin alpha-1	ITGA1	Integrin alpha-1	1	7	7	7	6	4	6	4	4	4	6	6	5	5	6	7	0	0	0	0	0	0	0	0	0	0	0	0	0	0	1	0	2	0	1	1	1	3	0	3	3	2
P56385	P56385	2	2	2	ATP synthase subunit e, mitochondrial	ATP5I	ATP synthase subunit e, mitochondrial	1	2	2	2	0	0	0	0	0	0	0	0	0	0	0	0	0	0	0	0	0	0	0	0	0	0	0	0	0	0	0	0	0	0	0	0	0	0	0	0	0	1
P56749	P56749	1	1	1	Claudin-12	CLDN12	Claudin-12	1	1	1	1	1	1	1	0	1	1	1	1	1	1	1	1	0	0	0	0	0	1	0	0	0	0	1	0	0	0	0	0	0	0	0	0	0	0	0	0	1	1
P57088	P57088	4	4	4	Transmembrane protein 33	TMEM33	Transmembrane protein 33	1	4	4	4	2	4	2	1	2	2	2	2	3	2	2	2	3	4	4	4	4	2	4	3	3	3	2	4	3	4	3	3	2	2	3	3	3	4	2	4	3	3
P57729	P57729	2	2	1	Ras-related protein Rab-38	RAB38	Ras-related protein Rab-38	1	2	2	1	0	1	0	0	0	0	1	0	0	0	1	0	0	0	1	0	0	0	0	0	1	0	0	0	2	1	1	1	1	1	2	1	1	1	1	1	1	1
P58107	P58107	10	9	9	Epiplakin	EPPK1	Epiplakin	1	10	9	9	0	0	0	0	0	0	0	0	0	0	0	0	1	0	0	1	1	1	1	1	0	2	0	0	3	3	4	5	4	5	3	2	4	2	4	5	1	1
P58546	P58546	3	3	3	Myotrophin	MTPN	Myotrophin	1	3	3	3	3	3	3	3	3	2	3	3	3	3	3	3	0	0	0	0	0	0	0	0	0	0	0	0	0	1	0	0	0	0	0	2	1	0	1	0	0	0
P59768	P59768	2	2	2	Guanine nucleotide-binding protein G(I)/G(S)/G(O) subunit gamma-2	GNG2	Guanine nucleotide-binding protein G(I)/G(S)/G(O) subunit gamma-2	1	2	2	2	1	2	1	1	2	2	2	2	1	1	2	2	0	0	0	0	0	0	0	0	0	0	0	0	0	0	0	0	0	0	0	0	0	0	0	0	0	0
P59998	P59998	3	3	3	Actin-related protein 2/3 complex subunit 4	ARPC4	Actin-related protein 2/3 complex subunit 4	1	3	3	3	2	2	2	2	2	1	2	2	2	2	2	2	2	3	3	2	3	3	2	2	1	2	2	3	1	0	0	1	1	2	1	1	1	1	0	0	1	1
P60033	P60033	7	7	7	CD81 antigen	CD81	CD81 antigen	1	7	7	7	7	6	7	7	7	6	7	7	7	7	7	6	5	5	5	5	4	5	5	5	4	5	5	5	4	5	5	5	5	4	4	4	4	5	5	5	1	1
P60174	P60174	16	16	16	Triosephosphate isomerase	TPI1	Triosephosphate isomerase	1	16	16	16	14	14	14	13	16	13	14	14	14	14	14	15	7	7	7	8	9	7	5	8	10	10	7	9	12	13	12	13	11	13	11	11	11	11	13	11	8	9
P60228	P60228	13	13	13	Eukaryotic translation initiation factor 3 subunit E	EIF3E	Eukaryotic translation initiation factor 3 subunit E	1	13	13	13	3	2	2	1	1	2	6	4	3	2	2	1	7	7	7	6	6	7	7	8	6	10	6	10	4	4	7	8	5	9	6	5	5	2	7	6	2	3
P60468	P60468	2	2	2	Protein transport protein Sec61 subunit beta	SEC61B	Protein transport protein Sec61 subunit beta	1	2	2	2	1	2	2	2	1	2	2	2	2	1	1	2	1	1	1	2	2	2	1	1	0	1	1	1	1	1	1	1	1	1	1	1	1	1	1	0	0	1
P60602	P60602	1	1	1	Reactive oxygen species modulator 1	ROMO1	Reactive oxygen species modulator 1	1	1	1	1	0	0	0	0	0	0	0	0	0	0	0	0	0	0	0	0	0	0	0	0	0	0	0	0	0	0	0	0	0	0	0	0	0	0	0	0	1	1
P60660;P14649	P60660	7;2	7;2	7;2	Myosin light polypeptide 6	MYL6	Myosin light polypeptide 6	2	7	7	7	7	6	7	7	7	7	7	7	7	7	7	7	5	5	6	5	6	4	5	5	5	5	5	5	5	5	5	5	5	5	6	5	4	4	4	5	5	4
P60709;Q6S8J3;A5A3E0;P0CG38;Q9BYX7;P0CG39	P60709	25;9;7;6;4;4	25;9;7;6;4;4	2;0;0;0;0;0	Actin, cytoplasmic 1;Actin, cytoplasmic 1, N-terminally processed	ACTB	Actin, cytoplasmic 1	6	25	25	2	20	19	21	20	20	20	20	20	19	20	20	20	20	18	18	19	20	18	19	19	19	18	18	16	20	21	20	20	19	21	21	21	21	20	21	21	16	16
P60842	P60842	19	19	12	Eukaryotic initiation factor 4A-I	EIF4A1	Eukaryotic initiation factor 4A-I	1	19	19	12	10	11	10	6	8	10	14	15	14	13	13	11	11	10	11	10	12	10	11	12	8	14	10	8	16	18	14	16	12	14	16	16	16	11	17	17	8	7
P60866	P60866	2	2	2	40S ribosomal protein S20	RPS20	40S ribosomal protein S20	1	2	2	2	1	0	0	1	0	0	0	0	0	1	0	1	2	2	2	2	2	2	1	0	2	2	2	2	2	0	0	2	1	1	1	2	0	2	0	0	2	2
P60891;P21108	P60891	6;2	6;2	3;0	Ribose-phosphate pyrophosphokinase 1	PRPS1	Ribose-phosphate pyrophosphokinase 1	2	6	6	3	4	3	3	3	1	1	5	5	5	4	5	4	1	1	0	0	0	0	0	0	0	0	0	0	2	0	0	2	1	0	0	1	0	0	2	0	0	0
P60900	P60900	11	11	11	Proteasome subunit alpha type-6	PSMA6	Proteasome subunit alpha type-6	1	11	11	11	5	5	7	5	7	6	6	6	5	5	8	8	5	6	5	4	6	5	5	4	3	6	5	6	10	10	10	11	9	10	9	10	10	5	11	10	6	5
P60903	P60903	4	4	4	Protein S100-A10	S100A10	Protein S100-A10	1	4	4	4	2	2	2	2	2	0	2	2	1	0	2	0	1	1	2	1	1	1	1	1	1	1	2	2	3	3	3	4	3	4	4	3	4	4	4	3	2	2
P60953;P17081;Q9H4E5	P60953	9;1;1	8;0;0	8;0;0	Cell division control protein 42 homolog	CDC42	Cell division control protein 42 homolog	3	9	8	8	8	7	8	8	8	8	8	9	8	8	8	9	8	5	6	7	8	8	8	7	8	7	7	8	6	7	6	7	5	7	6	6	6	7	7	5	5	6
P60981	P60981	8	8	8	Destrin	DSTN	Destrin	1	8	8	8	4	4	5	3	4	4	4	4	5	2	3	3	3	2	3	4	3	3	3	1	0	4	4	3	4	5	4	5	5	5	4	4	4	4	4	5	1	1
P60983	P60983	2	2	2	Glia maturation factor beta	GMFB	Glia maturation factor beta	1	2	2	2	0	1	1	0	0	0	1	1	0	1	0	0	1	0	0	1	1	0	1	0	0	1	1	0	0	0	0	0	0	0	0	0	0	0	0	0	1	0
P61006;P59190;Q96E17	P61006	8;1;1	7;0;1	6;0;0	Ras-related protein Rab-8A	RAB8A	Ras-related protein Rab-8A	3	8	7	6	6	6	6	5	5	6	6	6	7	6	6	5	6	5	6	7	7	6	6	6	5	7	6	6	4	5	5	4	4	5	3	5	3	4	5	4	2	3
P61009	P61009	4	4	4	Signal peptidase complex subunit 3	SPCS3	Signal peptidase complex subunit 3	1	4	4	4	1	0	1	1	0	1	0	0	0	0	1	1	3	3	2	3	3	3	3	3	3	3	3	3	2	2	2	3	2	2	2	2	3	3	4	4	3	3
P61019	P61019	10	10	4	Ras-related protein Rab-2A	RAB2A	Ras-related protein Rab-2A	1	10	10	4	9	8	9	9	9	8	8	9	6	8	8	8	5	3	5	6	7	5	6	6	6	5	6	4	6	7	6	5	5	7	4	3	4	5	5	5	3	3
P61020	P61020	6	3	3	Ras-related protein Rab-5B	RAB5B	Ras-related protein Rab-5B	1	6	3	3	6	6	6	4	5	5	6	6	6	6	6	5	3	3	3	3	3	3	3	3	2	4	3	3	3	2	4	2	4	3	2	3	1	3	3	2	1	2
P61026	P61026	11	11	9	Ras-related protein Rab-10	RAB10	Ras-related protein Rab-10	1	11	11	9	7	8	8	6	9	10	10	10	9	9	10	9	5	7	5	9	7	6	6	6	6	9	7	6	4	5	5	5	6	5	6	6	5	6	6	6	4	5
P61081	P61081	5	5	5	NEDD8-conjugating enzyme Ubc12	UBE2M	NEDD8-conjugating enzyme Ubc12	1	5	5	5	2	2	3	3	2	3	4	3	2	3	3	3	1	1	1	1	1	1	0	1	1	1	1	1	3	3	2	2	1	3	1	3	2	2	3	2	2	2
P61088;Q5JXB2	P61088	7;3	7;3	7;3	Ubiquitin-conjugating enzyme E2 N	UBE2N	Ubiquitin-conjugating enzyme E2 N	2	7	7	7	4	6	4	6	4	4	4	4	7	5	5	5	4	4	3	6	5	4	2	5	4	4	3	3	1	2	1	0	0	0	1	2	1	0	2	1	4	4
P61106	P61106	11	11	11	Ras-related protein Rab-14	RAB14	Ras-related protein Rab-14	1	11	11	11	9	10	9	8	7	9	9	9	10	9	8	8	9	8	9	11	10	8	9	10	10	9	9	9	6	7	8	9	9	6	7	7	7	7	8	10	7	7
P61158;Q9P1U1;Q9C0K3	P61158	14;2;1	14;2;1	14;2;1	Actin-related protein 3	ACTR3	Actin-related protein 3	3	14	14	14	7	7	6	3	4	6	9	7	8	8	8	6	9	7	5	7	7	6	8	7	10	7	6	5	10	10	9	9	10	10	9	8	9	6	12	11	5	8
P61160	P61160	10	10	10	Actin-related protein 2	ACTR2	Actin-related protein 2	1	10	10	10	1	4	3	1	2	3	4	4	3	3	3	4	5	2	5	7	5	4	4	4	2	2	2	3	8	7	8	9	8	8	8	7	9	7	7	7	2	4
P61163	P61163	5	5	3	Alpha-centractin	ACTR1A	Alpha-centractin	1	5	5	3	1	3	3	1	2	2	4	3	3	4	3	3	3	2	2	4	3	3	3	3	2	3	3	3	3	1	2	3	1	2	3	1	2	1	3	0	2	1
P61204	P61204	13	1	1	ADP-ribosylation factor 3	ARF3	ADP-ribosylation factor 3	1	13	1	1	10	11	11	11	11	10	12	10	10	11	12	11	9	9	6	8	10	9	10	9	11	8	10	8	9	10	10	10	9	9	10	9	11	9	9	9	4	2
P61221	P61221	5	5	5	ATP-binding cassette sub-family E member 1	ABCE1	ATP-binding cassette sub-family E member 1	1	5	5	5	0	1	1	0	0	1	2	3	3	2	1	1	1	1	1	0	0	1	0	1	1	0	1	1	2	2	4	3	3	3	2	2	1	2	2	3	0	0
P61224;A6NIZ1	P61224;A6NIZ1	14;10	14;10	5;3	Ras-related protein Rap-1b;Ras-related protein Rap-1b-like protein	RAP1B	Ras-related protein Rap-1b;Ras-related protein Rap-1b-like protein	2	14	14	5	14	13	13	13	13	13	13	13	13	13	13	13	9	9	10	10	10	9	9	10	10	9	9	8	10	12	12	12	10	13	11	10	10	11	11	11	7	7
P61225	P61225	10	5	5	Ras-related protein Rap-2b	RAP2B	Ras-related protein Rap-2b	1	10	5	5	9	10	10	7	10	10	9	10	10	10	10	9	7	4	4	7	5	6	5	5	6	5	3	5	5	7	8	7	6	8	5	6	6	6	6	6	3	4
P61247	P61247	11	11	11	40S ribosomal protein S3a	RPS3A	40S ribosomal protein S3a	1	11	11	11	7	8	8	6	4	7	8	8	8	7	7	9	10	10	11	9	10	10	9	9	9	10	10	10	11	11	11	10	10	10	10	11	9	11	9	8	5	4
P61254;Q9UNX3	P61254;Q9UNX3	5;4	5;4	5;4	60S ribosomal protein L26;60S ribosomal protein L26-like 1	RPL26;RPL26L1	60S ribosomal protein L26;60S ribosomal protein L26-like 1	2	5	5	5	0	0	1	0	0	0	0	0	1	0	2	0	5	5	5	5	4	5	5	5	4	5	5	5	3	2	0	1	0	2	0	3	0	2	1	0	4	4
P61313	P61313	10	10	10	60S ribosomal protein L15	RPL15	60S ribosomal protein L15	1	10	10	10	4	4	5	4	4	4	6	6	5	5	3	3	9	8	8	8	9	9	9	7	7	8	7	7	6	8	6	7	6	5	5	6	4	5	4	4	6	5
P61353	P61353	4	4	4	60S ribosomal protein L27	RPL27	60S ribosomal protein L27	1	4	4	4	1	2	3	0	1	1	2	3	1	3	3	2	3	3	3	3	3	3	3	3	3	3	3	3	4	3	3	4	3	3	2	4	2	3	3	0	0	2
P61421	P61421	9	9	9	V-type proton ATPase subunit d 1	ATP6V0D1	V-type proton ATPase subunit d 1	1	9	9	9	4	4	5	3	2	5	5	5	5	4	3	5	7	7	6	7	7	7	7	7	7	7	7	7	4	4	4	2	2	2	4	4	2	6	4	3	2	3
P61457	P61457	1	1	1	Pterin-4-alpha-carbinolamine dehydratase	PCBD1	Pterin-4-alpha-carbinolamine dehydratase	1	1	1	1	1	1	1	1	1	1	1	1	1	1	1	1	0	0	0	0	0	0	1	0	0	1	0	1	1	0	0	0	0	0	0	0	0	0	0	0	0	0
P61513;A6NKH3	P61513;A6NKH3	2;1	2;1	2;1	60S ribosomal protein L37a;Putative 60S ribosomal protein L37a-like protein	RPL37A;RPL37AP8	60S ribosomal protein L37a;Putative 60S ribosomal protein L37a-like protein	2	2	2	2	1	2	1	1	1	1	2	2	2	2	2	2	2	1	1	2	2	1	2	2	2	2	2	1	2	2	1	2	1	2	2	2	2	1	2	1	0	1
P61586	P61586	12	12	4	Transforming protein RhoA	RHOA	Transforming protein RhoA	1	12	12	4	11	10	10	11	11	10	10	11	11	9	11	11	8	8	7	10	8	8	10	8	9	8	8	7	7	9	8	7	9	7	9	7	6	9	8	8	6	4
P61604	P61604	7	7	7	10 kDa heat shock protein, mitochondrial	HSPE1	10 kDa heat shock protein, mitochondrial	1	7	7	7	2	2	2	3	2	2	2	2	3	2	2	2	0	1	1	2	2	2	1	1	1	1	1	1	1	2	0	1	1	1	1	2	0	3	2	1	6	6
P61619;Q9H9S3	P61619	7;2	7;2	7;2	Protein transport protein Sec61 subunit alpha isoform 1	SEC61A1	Protein transport protein Sec61 subunit alpha isoform 1	2	7	7	7	2	2	0	2	1	2	2	2	2	2	2	2	4	3	3	6	6	5	3	4	4	5	5	4	5	4	2	3	4	4	4	3	1	3	3	4	3	3
P61626	P61626	6	6	6	Lysozyme C	LYZ	Lysozyme C	1	6	6	6	2	1	0	3	4	1	2	1	5	1	3	5	0	0	1	0	0	0	1	1	0	1	0	0	0	0	0	0	0	0	0	0	0	1	2	0	0	0
P61758	P61758	3	3	3	Prefoldin subunit 3	VBP1	Prefoldin subunit 3	1	3	3	3	2	3	1	1	3	2	3	2	2	3	2	2	1	1	0	1	0	1	0	0	1	1	0	0	0	0	1	0	0	0	1	0	1	0	0	0	0	0
P61764	P61764	2	2	2	Syntaxin-binding protein 1	STXBP1	Syntaxin-binding protein 1	1	2	2	2	2	2	2	1	1	1	2	2	2	1	2	1	0	0	1	0	1	1	1	1	0	1	0	0	0	0	0	0	0	0	0	0	0	0	0	0	0	0
P61769	P61769	4	4	4	Beta-2-microglobulin;Beta-2-microglobulin form pI 5.3	B2M	Beta-2-microglobulin	1	4	4	4	4	4	4	2	4	4	4	4	4	4	4	4	2	2	3	3	4	3	4	3	2	3	3	3	4	4	4	4	4	4	4	4	4	4	3	4	3	1
P61803	P61803	3	3	3	Dolichyl-diphosphooligosaccharide--protein glycosyltransferase subunit DAD1	DAD1	Dolichyl-diphosphooligosaccharide--protein glycosyltransferase subunit DAD1	1	3	3	3	3	3	3	3	3	3	3	2	3	3	3	3	3	3	3	3	3	3	3	3	2	3	3	3	2	3	2	2	3	3	3	3	3	3	3	3	3	3
P61916	P61916	6	6	6	Epididymal secretory protein E1	NPC2	NPC intracellular cholesterol transporter 2	1	6	6	6	1	1	1	1	1	0	1	0	1	1	2	1	1	1	1	1	1	1	1	1	1	1	1	1	2	1	2	0	1	2	1	1	0	2	1	2	4	3
P61956;Q6EEV6;P55854	P61956;Q6EEV6;P55854	2;1;1	2;1;1	2;1;1	Small ubiquitin-related modifier 2;Small ubiquitin-related modifier 4;Small ubiquitin-related modifier 3	SUMO2;SUMO4;SUMO3	Small ubiquitin-related modifier 2;Small ubiquitin-related modifier 4;Small ubiquitin-related modifier 3	3	2	2	2	2	2	2	2	2	2	2	2	2	2	2	2	1	1	1	1	1	1	0	0	0	1	1	1	0	0	0	0	0	0	0	0	0	0	0	0	1	0
P61962	P61962	2	2	2	DDB1- and CUL4-associated factor 7	DCAF7	DDB1- and CUL4-associated factor 7	1	2	2	2	0	1	0	0	0	0	1	1	0	1	1	0	0	0	1	1	1	0	1	0	0	0	0	0	0	0	0	0	0	0	0	0	0	0	1	0	0	0
P61966	P61966	2	2	2	AP-1 complex subunit sigma-1A	AP1S1	AP-1 complex subunit sigma-1A	1	2	2	2	0	0	0	0	0	0	0	0	0	0	0	0	0	0	0	1	0	0	0	0	1	1	0	1	0	0	0	0	0	0	0	0	0	0	0	0	0	0
P61970	P61970	6	6	6	Nuclear transport factor 2	NUTF2	Nuclear transport factor 2	1	6	6	6	5	6	4	4	4	4	6	6	5	4	5	2	1	1	1	2	2	2	1	2	2	2	2	1	4	3	5	5	3	5	5	4	5	4	4	4	1	1
P61978	P61978	10	10	10	Heterogeneous nuclear ribonucleoprotein K	HNRNPK	Heterogeneous nuclear ribonucleoprotein K	1	10	10	10	6	7	7	4	6	7	6	7	6	7	6	8	5	6	6	6	7	6	6	6	5	6	6	5	6	5	5	6	5	5	5	5	5	5	4	5	3	3
P61981	P61981	17	14	13	14-3-3 protein gamma;14-3-3 protein gamma, N-terminally processed	YWHAG	14-3-3 protein gamma	1	17	14	13	14	17	16	16	14	17	16	16	15	16	15	16	7	7	7	10	9	9	8	7	9	10	6	7	12	13	11	11	11	11	10	12	13	13	11	10	7	7
P62070	P62070	8	8	6	Ras-related protein R-Ras2	RRAS2	Ras-related protein R-Ras2	1	8	8	6	6	7	8	7	7	7	8	8	8	7	6	7	7	3	6	6	5	4	4	4	4	5	7	4	4	5	6	7	5	6	5	5	5	5	6	6	5	5
P62079	P62079	3	3	3	Tetraspanin-5	TSPAN5	Tetraspanin-5	1	3	3	3	2	3	2	1	3	3	3	3	3	3	3	3	0	0	0	0	0	0	0	0	0	0	0	0	0	1	0	0	0	0	1	0	0	0	1	0	0	0
P62081	P62081	3	3	3	40S ribosomal protein S7	RPS7	40S ribosomal protein S7	1	3	3	3	2	3	2	1	2	3	2	2	2	2	2	2	3	3	3	3	3	3	3	3	3	3	3	3	2	3	1	3	1	2	2	3	2	2	0	1	3	2
P62136	P62136	14	2	2	Serine/threonine-protein phosphatase PP1-alpha catalytic subunit	PPP1CA	Serine/threonine-protein phosphatase PP1-alpha catalytic subunit	1	14	2	2	11	11	10	7	7	9	11	10	9	11	13	8	11	11	10	9	10	10	9	10	6	11	10	10	12	10	12	14	11	11	13	12	11	12	10	10	7	9
P62140	P62140	13	3	3	Serine/threonine-protein phosphatase PP1-beta catalytic subunit	PPP1CB	Serine/threonine-protein phosphatase PP1-beta catalytic subunit	1	13	3	3	8	10	10	6	6	8	11	9	7	9	12	9	10	8	9	10	10	7	8	9	7	9	7	9	10	9	10	13	11	9	11	11	11	10	10	10	7	8
P62166	P62166	5	5	5	Neuronal calcium sensor 1	NCS1	Neuronal calcium sensor 1	1	5	5	5	4	2	4	4	3	4	3	4	4	4	3	3	1	0	0	1	0	0	0	1	0	2	1	1	0	0	0	0	0	0	0	0	0	0	0	0	0	0
P62191	P62191	9	9	9	26S protease regulatory subunit 4	PSMC1	26S proteasome regulatory subunit 4	1	9	9	9	2	5	2	0	1	2	5	4	4	2	4	2	7	6	8	5	6	6	6	6	3	5	5	6	8	6	5	8	7	7	9	6	5	0	7	8	0	0
P62195	P62195	11	11	11	26S protease regulatory subunit 8	PSMC5	26S proteasome regulatory subunit 8	1	11	11	11	2	5	4	0	1	2	4	4	4	4	4	2	8	8	8	8	7	5	7	7	6	9	7	7	6	8	8	7	6	7	6	6	5	4	8	9	2	3
P62241	P62241	11	11	11	40S ribosomal protein S8	RPS8	40S ribosomal protein S8	1	11	11	11	8	9	8	8	9	8	9	7	9	9	9	9	11	11	10	11	11	11	10	10	11	10	11	9	10	9	7	6	8	8	7	10	7	9	9	8	5	7
P62244	P62244	7	7	7	40S ribosomal protein S15a	RPS15A	40S ribosomal protein S15a	1	7	7	7	2	3	1	1	0	1	2	1	2	0	0	0	2	2	2	3	3	2	3	2	4	3	3	3	7	6	6	5	4	4	5	4	3	4	6	4	3	3
P62249	P62249	9	9	9	40S ribosomal protein S16	RPS16	40S ribosomal protein S16	1	9	9	9	6	6	6	3	3	6	6	6	4	6	5	4	6	7	6	9	9	9	6	7	9	7	8	7	7	7	7	7	7	8	6	7	6	7	6	6	3	2
P62258	P62258	25	25	22	14-3-3 protein epsilon	YWHAE	14-3-3 protein epsilon	1	25	25	22	25	23	25	24	22	24	22	22	22	23	22	24	16	14	12	13	13	13	12	13	14	13	13	14	15	15	13	14	14	13	15	12	15	16	14	12	10	12
P62263	P62263	2	2	2	40S ribosomal protein S14	RPS14	40S ribosomal protein S14	1	2	2	2	0	1	1	0	0	1	2	1	2	1	1	1	1	0	0	0	0	0	0	0	0	0	0	1	1	1	1	0	1	0	0	1	1	0	1	1	0	1
P62266	P62266	5	5	5	40S ribosomal protein S23	RPS23	40S ribosomal protein S23	1	5	5	5	2	3	1	1	2	1	3	3	3	2	2	1	2	2	1	4	4	2	3	2	4	4	3	2	4	3	3	3	3	3	3	3	2	3	3	2	0	0
P62269	P62269	8	8	8	40S ribosomal protein S18	RPS18	40S ribosomal protein S18	1	8	8	8	6	7	6	4	5	5	6	7	7	4	5	6	4	7	6	6	8	4	5	8	5	6	5	5	5	7	6	6	5	7	7	6	5	6	5	6	4	4
P62277	P62277	4	4	4	40S ribosomal protein S13	RPS13	40S ribosomal protein S13	1	4	4	4	2	3	3	1	2	3	3	4	3	3	3	3	4	3	4	4	4	4	4	4	2	4	4	4	4	4	3	3	3	4	3	3	2	3	4	3	2	2
P62280	P62280	6	6	6	40S ribosomal protein S11	RPS11	40S ribosomal protein S11	1	6	6	6	2	4	3	0	1	2	4	3	3	3	4	2	5	6	6	6	6	6	6	5	5	6	5	5	5	5	5	4	4	5	5	5	5	5	5	5	5	4
P62304	P62304	2	2	2	Small nuclear ribonucleoprotein E	SNRPE	Small nuclear ribonucleoprotein E	1	2	2	2	0	0	1	0	1	1	2	1	1	1	0	1	2	2	2	2	1	1	2	2	1	2	2	1	1	0	0	1	1	0	0	1	0	0	1	0	0	1
P62306	P62306	2	2	2	Small nuclear ribonucleoprotein F	SNRPF	Small nuclear ribonucleoprotein F	1	2	2	2	1	1	2	0	0	1	2	2	2	1	2	2	2	1	2	2	1	1	0	0	0	1	1	2	0	0	0	1	2	1	1	0	0	0	1	2	0	0
P62314	P62314	3	3	3	Small nuclear ribonucleoprotein Sm D1	SNRPD1	Small nuclear ribonucleoprotein Sm D1	1	3	3	3	2	3	2	2	0	2	1	2	3	2	0	1	1	1	2	2	2	2	3	3	2	2	1	2	1	2	1	2	1	1	1	2	1	2	3	2	0	1
P62316	P62316	1	1	1	Small nuclear ribonucleoprotein Sm D2	SNRPD2	Small nuclear ribonucleoprotein Sm D2	1	1	1	1	1	1	1	0	1	1	1	0	1	1	0	1	0	1	0	0	1	1	0	0	1	0	0	0	0	0	0	0	0	0	0	0	0	0	0	0	0	0
P62318	P62318	2	2	2	Small nuclear ribonucleoprotein Sm D3	SNRPD3	Small nuclear ribonucleoprotein Sm D3	1	2	2	2	0	1	1	1	1	1	2	2	2	2	2	1	1	1	1	1	1	1	1	1	0	1	1	1	0	0	0	0	1	0	1	0	0	1	2	0	0	1
P62328	P62328	6	6	5	Thymosin beta-4;Hematopoietic system regulatory peptide	TMSB4X	Thymosin beta-4	1	6	6	5	4	3	5	2	4	2	3	4	5	4	4	5	2	0	1	1	1	2	0	2	2	2	1	1	1	1	1	1	1	2	2	0	1	1	1	1	1	0
P62330	P62330	7	7	7	ADP-ribosylation factor 6	ARF6	ADP-ribosylation factor 6	1	7	7	7	7	7	7	6	7	7	7	7	7	7	7	5	3	4	3	6	6	4	4	4	5	4	4	3	3	5	5	5	5	5	4	5	3	4	5	4	2	3
P62333	P62333	10	10	10	26S protease regulatory subunit 10B	PSMC6	26S proteasome regulatory subunit 10B	1	10	10	10	3	5	3	0	0	2	3	7	4	3	3	2	3	3	5	4	4	4	1	4	4	4	4	1	6	8	8	6	5	8	6	4	6	3	9	7	1	1
P62424	P62424	13	13	13	60S ribosomal protein L7a	RPL7A	60S ribosomal protein L7a	1	13	13	13	6	10	5	4	5	3	5	7	5	7	7	7	13	13	13	13	12	13	13	13	11	12	12	13	9	8	6	9	5	6	6	9	6	5	6	7	5	3
P62491;P57735	P62491	10;1	1;0	1;0	Ras-related protein Rab-11A	RAB11A	Ras-related protein Rab-11A	2	10	1	1	10	9	10	9	10	9	10	9	9	9	9	9	7	6	6	8	9	5	5	7	7	9	8	6	5	7	4	6	7	4	6	6	4	5	6	7	4	3
P62495	P62495	3	3	3	Eukaryotic peptide chain release factor subunit 1	ETF1	Eukaryotic peptide chain release factor subunit 1	1	3	3	3	1	0	1	0	0	0	0	1	1	0	0	1	1	0	1	1	1	1	0	0	1	1	1	1	1	0	0	1	1	0	1	1	0	1	0	0	0	0
P62633	P62633	2	2	2	Cellular nucleic acid-binding protein	CNBP	Cellular nucleic acid-binding protein	1	2	2	2	1	2	1	1	1	1	2	2	1	2	2	1	0	0	0	0	0	0	0	0	0	0	0	0	0	0	0	0	0	0	0	0	0	0	0	0	0	0
P62701;Q8TD47;P22090	P62701	17;7;7	17;7;7	17;7;7	40S ribosomal protein S4, X isoform	RPS4X	40S ribosomal protein S4, X isoform	3	17	17	17	8	11	10	3	8	9	12	13	8	10	9	8	14	15	16	16	14	16	17	14	11	15	14	14	16	14	12	15	12	12	12	11	11	11	13	13	13	12
P62714;P60510	P62714	10;1	1;0	1;0	Serine/threonine-protein phosphatase 2A catalytic subunit beta isoform	PPP2CB	Serine/threonine-protein phosphatase 2A catalytic subunit beta isoform	2	10	1	1	4	6	6	6	4	4	8	5	5	5	6	6	3	2	3	5	3	4	5	5	4	3	3	2	8	7	6	6	6	7	8	7	8	4	8	6	0	1
P62745	P62745	9	7	7	Rho-related GTP-binding protein RhoB	RHOB	Rho-related GTP-binding protein RhoB	1	9	7	7	6	9	8	6	6	7	7	8	9	9	8	8	5	6	4	6	5	6	5	5	6	5	5	4	1	2	1	1	2	1	2	1	2	1	1	1	1	0
P62753	P62753	8	8	8	40S ribosomal protein S6	RPS6	40S ribosomal protein S6	1	8	8	8	4	3	3	1	2	4	3	3	3	3	3	3	8	6	6	7	8	6	6	7	7	5	5	5	5	5	5	4	3	4	3	5	4	2	5	4	4	3
P62760	P62760	1	1	1	Visinin-like protein 1	VSNL1	Visinin-like protein 1	1	1	1	1	0	0	0	0	0	0	0	0	0	0	0	0	0	0	0	0	0	0	0	0	0	0	0	0	0	0	0	0	0	0	0	0	0	0	0	0	1	1
P62805	P62805	15	15	15	Histone H4	HIST1H4A	Histone H4	1	15	15	15	14	14	13	13	13	13	13	13	12	14	14	12	14	14	14	14	14	14	14	15	15	15	14	15	11	14	11	10	9	10	11	10	10	10	11	11	5	6
P62820	P62820	10	9	3	Ras-related protein Rab-1A	RAB1A	Ras-related protein Rab-1A	1	10	9	3	9	8	9	8	7	8	8	8	8	9	8	7	8	7	7	8	8	7	8	8	7	8	8	7	6	6	7	6	7	7	5	5	6	5	6	5	4	6
P62826	P62826	9	9	9	GTP-binding nuclear protein Ran	RAN	GTP-binding nuclear protein Ran	1	9	9	9	7	8	8	7	7	8	7	8	7	7	7	8	6	6	6	6	7	6	6	7	7	7	6	6	7	7	7	7	5	6	7	6	6	5	6	8	5	4
P62829	P62829	2	2	2	60S ribosomal protein L23	RPL23	60S ribosomal protein L23	1	2	2	2	1	1	1	0	0	1	1	1	1	1	1	1	2	1	1	1	1	1	1	1	1	2	2	1	2	0	2	2	2	2	2	1	1	1	2	2	2	2
P62834	P62834	14	5	5	Ras-related protein Rap-1A	RAP1A	Ras-related protein Rap-1A	1	14	5	5	11	14	12	11	11	12	14	14	13	14	14	12	10	9	11	11	9	9	9	10	10	10	9	9	9	10	10	11	9	11	10	8	8	9	10	9	6	6
P62837;P61077;Q9Y2X8;P51668	P62837;P61077	4;3;1;1	4;3;1;1	4;3;1;1	Ubiquitin-conjugating enzyme E2 D2;Ubiquitin-conjugating enzyme E2 D3	UBE2D2;UBE2D3	Ubiquitin-conjugating enzyme E2 D2;Ubiquitin-conjugating enzyme E2 D3	4	4	4	4	3	3	3	3	3	3	3	3	3	3	3	2	1	2	1	2	2	0	1	2	2	2	2	2	2	1	3	1	3	3	3	3	2	2	2	1	2	2
P62847	P62847	5	5	5	40S ribosomal protein S24	RPS24	40S ribosomal protein S24	1	5	5	5	2	2	3	2	2	2	3	2	2	3	2	1	5	5	5	5	5	5	5	5	4	5	5	5	4	4	3	2	3	2	3	4	3	3	3	2	1	0
P62851	P62851	5	5	5	40S ribosomal protein S25	RPS25	40S ribosomal protein S25	1	5	5	5	3	2	1	0	2	3	3	3	2	2	3	2	4	4	5	5	5	5	4	5	5	2	3	3	2	2	1	2	2	2	2	3	1	2	1	0	3	4
P62854;Q5JNZ5	P62854;Q5JNZ5	4;3	4;3	4;3	40S ribosomal protein S26;Putative 40S ribosomal protein S26-like 1	RPS26;RPS26P11	40S ribosomal protein S26;Putative 40S ribosomal protein S26-like 1	2	4	4	4	3	2	2	3	3	3	2	2	3	2	2	2	4	3	4	4	4	4	4	4	4	4	4	3	4	3	4	4	4	4	4	3	2	3	2	2	1	1
P62857	P62857	1	1	1	40S ribosomal protein S28	RPS28	40S ribosomal protein S28	1	1	1	1	1	1	1	0	1	1	0	1	1	1	1	1	0	0	0	1	0	0	1	0	0	0	0	0	0	0	0	0	0	0	0	0	0	0	0	0	0	0
P62873	P62873	17	17	10	Guanine nucleotide-binding protein G(I)/G(S)/G(T) subunit beta-1	GNB1	Guanine nucleotide-binding protein G(I)/G(S)/G(T) subunit beta-1	1	17	17	10	16	16	15	15	16	17	14	16	14	16	15	16	10	10	8	10	12	9	8	8	10	11	12	10	10	13	12	14	14	13	13	14	12	14	12	13	10	7
P62877	P62877	3	3	3	E3 ubiquitin-protein ligase RBX1;E3 ubiquitin-protein ligase RBX1, N-terminally processed	RBX1	E3 ubiquitin-protein ligase RBX1	1	3	3	3	2	1	1	1	1	1	1	0	1	2	3	1	0	0	0	1	0	0	0	0	1	0	0	1	0	0	1	0	0	0	0	0	1	0	0	0	0	0
P62879	P62879	17	11	8	Guanine nucleotide-binding protein G(I)/G(S)/G(T) subunit beta-2	GNB2	Guanine nucleotide-binding protein G(I)/G(S)/G(T) subunit beta-2	1	17	11	8	17	17	15	16	17	17	16	17	16	17	17	17	11	13	11	13	14	13	12	12	11	13	13	13	10	12	13	14	14	14	14	14	11	14	14	14	10	7
P62888	P62888	6	6	6	60S ribosomal protein L30	RPL30	60S ribosomal protein L30	1	6	6	6	1	1	1	0	0	0	2	0	1	3	1	1	6	6	5	6	6	5	4	4	5	5	5	4	4	5	1	3	3	3	3	5	3	3	3	3	0	0
P62899	P62899	2	2	2	60S ribosomal protein L31	RPL31	60S ribosomal protein L31	1	2	2	2	1	1	1	1	0	1	1	1	1	1	1	1	1	1	0	1	0	0	0	0	1	0	0	0	2	2	2	2	2	2	1	2	1	2	1	0	0	0
P62906	P62906	5	5	5	60S ribosomal protein L10a	RPL10A	60S ribosomal protein L10a	1	5	5	5	0	1	0	1	0	1	0	1	0	0	1	0	2	2	2	3	2	2	2	2	1	3	2	2	2	0	0	0	1	0	2	0	0	0	0	0	1	1
P62910	P62910	7	7	7	60S ribosomal protein L32	RPL32	60S ribosomal protein L32	1	7	7	7	2	3	1	2	2	2	1	2	1	1	2	0	6	4	4	6	6	5	5	6	7	5	6	6	5	4	2	3	3	3	3	4	1	4	3	3	2	3
P62913	P62913	5	5	5	60S ribosomal protein L11	RPL11	60S ribosomal protein L11	1	5	5	5	2	2	3	2	1	2	4	4	3	4	3	3	3	3	3	3	3	3	3	3	3	3	3	2	3	3	4	3	3	3	4	4	1	3	2	2	2	2
P62917	P62917	7	7	7	60S ribosomal protein L8	RPL8	60S ribosomal protein L8	1	7	7	7	3	4	3	3	2	4	6	5	4	2	4	3	5	5	5	6	7	5	4	6	7	6	5	5	6	3	3	3	2	5	4	6	2	4	6	6	3	2
P62937;A0A0B4J2A2;A0A075B767;P0DN37	P62937	13;2;2;1	13;2;2;1	11;0;0;0	Peptidyl-prolyl cis-trans isomerase A;Peptidyl-prolyl cis-trans isomerase A, N-terminally processed	PPIA	Peptidyl-prolyl cis-trans isomerase A	4	13	13	11	13	13	12	13	13	13	13	13	13	13	13	13	10	10	10	10	11	10	9	8	10	11	10	9	13	13	13	13	13	13	13	13	12	13	13	13	7	9
P62942	P62942	4	4	4	Peptidyl-prolyl cis-trans isomerase FKBP1A	FKBP1A	Peptidyl-prolyl cis-trans isomerase FKBP1A	1	4	4	4	3	2	3	4	4	4	4	4	2	3	3	3	0	0	0	0	0	0	0	0	0	0	0	0	1	2	1	2	2	2	0	1	2	2	2	1	0	0
P62979;P62987;P0CG47;P0CG48	P62979;P62987;P0CG47;P0CG48	11;9;9;9	11;9;9;9	11;9;9;9	Ubiquitin-40S ribosomal protein S27a;Ubiquitin;40S ribosomal protein S27a;Ubiquitin-60S ribosomal protein L40;Ubiquitin;60S ribosomal protein L40;Polyubiquitin-B;Ubiquitin;Polyubiquitin-C;Ubiquitin	RPS27A;UBA52;UBB;UBC	Ubiquitin-40S ribosomal protein S27a;Ubiquitin-60S ribosomal protein L40;Polyubiquitin-B;Polyubiquitin-C	4	11	11	11	9	9	10	9	10	10	10	10	10	10	11	10	7	7	8	7	7	7	7	7	7	7	7	7	7	7	7	7	7	8	8	7	7	9	9	8	5	4
P62993	P62993	10	10	10	Growth factor receptor-bound protein 2	GRB2	Growth factor receptor-bound protein 2	1	10	10	10	9	7	9	9	7	9	9	10	9	9	9	8	1	0	2	2	4	2	3	4	1	5	1	2	0	0	1	0	0	1	0	0	0	0	0	0	3	0
P62995	P62995	1	1	1	Transformer-2 protein homolog beta	TRA2B	Transformer-2 protein homolog beta	1	1	1	1	0	0	0	0	0	0	1	0	0	0	0	0	1	1	1	1	1	1	1	1	1	1	1	1	0	0	0	0	0	0	0	0	0	0	0	0	0	0
P63000;P60763	P63000;P60763	10;6	9;5	5;2	Ras-related C3 botulinum toxin substrate 1;Ras-related C3 botulinum toxin substrate 3	RAC1;RAC3	Ras-related C3 botulinum toxin substrate 1;Ras-related C3 botulinum toxin substrate 3	2	10	9	5	9	8	9	9	9	9	9	9	9	9	9	9	9	9	8	8	9	8	8	8	8	9	9	9	4	5	5	5	4	5	4	4	4	6	4	5	6	7
P63010	P63010	13	13	7	AP-2 complex subunit beta	AP2B1	AP-2 complex subunit beta	1	13	13	7	9	10	11	3	6	7	10	11	10	10	11	8	5	3	4	7	8	3	5	4	2	6	6	4	3	2	1	4	3	6	6	5	3	4	3	4	1	2
P63027	P63027	6	6	3	Vesicle-associated membrane protein 2	VAMP2	Vesicle-associated membrane protein 2	1	6	6	3	3	4	5	5	5	5	4	5	5	5	4	5	1	1	2	2	2	1	1	2	1	1	1	1	3	3	3	3	3	3	3	3	3	3	3	3	1	1
Q5JWF2;P63092;P38405	Q5JWF2;P63092	15;15;2	14;14;1	14;14;1	Guanine nucleotide-binding protein G(s) subunit alpha isoforms XLas;Guanine nucleotide-binding protein G(s) subunit alpha isoforms short	GNAS	Guanine nucleotide-binding protein G(s) subunit alpha isoforms XLas;Guanine nucleotide-binding protein G(s) subunit alpha isoforms short	3	15	14	14	14	15	14	11	11	14	15	15	14	15	15	14	12	11	12	13	13	11	11	12	11	13	11	12	2	4	4	3	3	4	2	1	1	3	5	2	3	6
P63096	P63096	18	10	10	Guanine nucleotide-binding protein G(i) subunit alpha-1	GNAI1	Guanine nucleotide-binding protein G(i) subunit alpha-1	1	18	10	10	15	16	14	15	13	12	17	17	15	14	14	16	7	6	7	7	7	7	6	6	7	7	8	7	8	9	11	7	5	9	6	6	8	11	7	8	8	10
P63104;REV__P53355;O00213;Q92674	P63104	23;1;1;1	20;1;1;1	19;1;1;1	14-3-3 protein zeta/delta	YWHAZ	14-3-3 protein zeta/delta	4	23	20	19	18	18	18	21	19	20	17	17	18	18	17	18	12	9	9	14	15	11	10	11	15	14	13	12	16	19	14	14	14	16	15	14	14	17	15	14	11	9
P63151;Q66LE6;Q00005;Q9Y2T4	P63151;Q66LE6	5;3;2;1	5;3;2;1	5;3;2;1	Serine/threonine-protein phosphatase 2A 55 kDa regulatory subunit B alpha isoform;Serine/threonine-protein phosphatase 2A 55 kDa regulatory subunit B delta isoform	PPP2R2A;PPP2R2D	Serine/threonine-protein phosphatase 2A 55 kDa regulatory subunit B alpha isoform;Serine/threonine-protein phosphatase 2A 55 kDa regulatory subunit B delta isoform	4	5	5	5	1	2	1	0	0	1	2	2	1	1	0	0	1	2	1	1	1	1	1	1	1	1	1	1	4	3	4	5	4	4	4	3	3	3	3	4	1	2
P63167;Q96FJ2	P63167;Q96FJ2	3;2	3;2	3;2	Dynein light chain 1, cytoplasmic;Dynein light chain 2, cytoplasmic	DYNLL1;DYNLL2	Dynein light chain 1, cytoplasmic;Dynein light chain 2, cytoplasmic	2	3	3	3	2	3	2	0	0	0	3	3	2	2	3	3	1	1	1	1	1	1	2	2	2	0	1	1	1	2	1	1	3	2	2	1	2	2	2	2	0	1
P63208	P63208	5	5	5	S-phase kinase-associated protein 1	SKP1	S-phase kinase-associated protein 1	1	5	5	5	3	2	3	3	1	2	2	3	2	3	3	3	1	1	2	2	2	1	1	1	1	1	2	3	1	2	2	2	1	1	0	0	0	0	0	1	2	1
P63218	P63218	4	4	4	Guanine nucleotide-binding protein G(I)/G(S)/G(O) subunit gamma-5	GNG5	Guanine nucleotide-binding protein G(I)/G(S)/G(O) subunit gamma-5	1	4	4	4	4	4	4	4	4	4	4	4	4	3	4	3	4	2	2	4	3	3	3	4	4	4	4	2	1	0	1	1	1	0	1	0	0	0	1	1	1	1
P63241;Q6IS14;Q9GZV4	P63241;Q6IS14;Q9GZV4	8;6;4	8;6;4	8;6;4	Eukaryotic translation initiation factor 5A-1;Eukaryotic translation initiation factor 5A-1-like;Eukaryotic translation initiation factor 5A-2	EIF5A;EIF5AL1;EIF5A2	Eukaryotic translation initiation factor 5A-1;Eukaryotic translation initiation factor 5A-1-like;Eukaryotic translation initiation factor 5A-2	3	8	8	8	6	7	6	6	6	6	8	6	7	6	6	7	1	2	1	3	2	3	3	2	1	3	3	3	4	3	4	5	3	4	3	3	2	3	4	3	2	3
P63244	P63244	18	18	18	Guanine nucleotide-binding protein subunit beta-2-like 1;Guanine nucleotide-binding protein subunit beta-2-like 1, N-terminally processed	GNB2L1	Receptor of activated protein C kinase 1	1	18	18	18	11	13	7	7	6	6	11	13	11	8	11	10	11	6	7	10	12	8	10	9	10	12	10	8	14	15	15	13	15	14	15	14	16	15	15	14	5	5
P63261	P63261	24	1	1	Actin, cytoplasmic 2;Actin, cytoplasmic 2, N-terminally processed	ACTG1	Actin, cytoplasmic 2	1	24	1	1	20	19	21	20	20	20	20	20	19	20	20	20	20	17	17	19	20	17	18	19	19	18	18	15	20	21	20	20	19	21	21	21	21	20	21	21	15	15
P63313	P63313	3	2	2	Thymosin beta-10	TMSB10	Thymosin beta-10	1	3	2	2	2	2	2	1	2	2	2	2	2	2	3	3	1	0	1	0	1	1	0	2	1	2	0	0	1	1	1	1	1	1	1	1	1	2	1	1	1	1
P67775	P67775	10	10	1	Serine/threonine-protein phosphatase 2A catalytic subunit alpha isoform	PPP2CA	Serine/threonine-protein phosphatase 2A catalytic subunit alpha isoform	1	10	10	1	4	6	6	6	4	4	8	5	5	5	6	6	3	2	3	5	3	4	5	5	4	3	3	3	9	8	7	7	7	7	8	7	7	5	8	6	1	2
P67809;Q9Y2T7;P16989	P67809	5;1;1	5;1;1	5;1;1	Nuclease-sensitive element-binding protein 1	YBX1	Y-box-binding protein 1	3	5	5	5	3	4	4	4	3	4	4	5	3	5	4	4	1	1	2	3	1	2	0	1	1	1	1	3	0	1	1	1	1	1	2	0	1	2	2	1	0	0
P67812	P67812	4	4	4	Signal peptidase complex catalytic subunit SEC11A	SEC11A	Signal peptidase complex catalytic subunit SEC11A	1	4	4	4	0	3	1	0	1	1	3	1	0	0	0	0	4	4	4	4	4	4	4	4	4	4	4	4	4	3	3	2	3	3	2	4	1	3	4	3	4	4
P67870	P67870	7	7	7	Casein kinase II subunit beta	CSNK2B	Casein kinase II subunit beta	1	7	7	7	3	5	4	2	3	2	5	2	3	3	2	3	4	4	4	4	3	4	1	3	4	2	3	5	5	1	1	1	1	3	2	4	0	3	2	1	2	2
P67936	P67936	7	7	2	Tropomyosin alpha-4 chain	TPM4	Tropomyosin alpha-4 chain	1	7	7	2	3	3	3	3	4	4	4	4	3	3	4	3	1	0	0	1	2	1	2	1	1	1	2	1	0	1	0	1	0	0	0	0	0	0	1	0	3	5
P68032;P68133;P62736;P63267	P68032;P68133;P62736;P63267	15;14;14;13	4;4;4;3	4;4;4;3	Actin, alpha cardiac muscle 1;Actin, alpha skeletal muscle;Actin, aortic smooth muscle;Actin, gamma-enteric smooth muscle	ACTC1;ACTA1;ACTA2;ACTG2	Actin, alpha cardiac muscle 1;Actin, alpha skeletal muscle;Actin, aortic smooth muscle;Actin, gamma-enteric smooth muscle	4	15	4	4	13	13	14	11	13	11	13	12	13	12	12	12	13	12	13	12	14	13	13	14	13	13	13	12	11	11	12	11	12	11	11	11	13	11	13	11	10	9
P68036;A0A1B0GUS4	P68036	5;2	5;2	5;2	Ubiquitin-conjugating enzyme E2 L3	UBE2L3	Ubiquitin-conjugating enzyme E2 L3	2	5	5	5	3	3	3	3	3	5	4	2	3	4	4	3	0	1	1	0	0	0	2	0	0	0	0	0	0	1	0	0	1	0	0	1	0	0	0	0	1	1
P68104;Q5VTE0	P68104;Q5VTE0	22;21	22;21	12;11	Elongation factor 1-alpha 1;Putative elongation factor 1-alpha-like 3	EEF1A1;EEF1A1P5	Elongation factor 1-alpha 1;Putative elongation factor 1-alpha-like 3	2	22	22	12	18	17	18	14	16	14	18	16	17	14	17	18	15	12	13	16	14	14	13	13	15	14	14	14	14	15	14	16	16	16	14	15	12	15	14	14	11	9
P68363;Q9H853	P68363	27;1	27;1	0;0	Tubulin alpha-1B chain	TUBA1B	Tubulin alpha-1B chain	2	27	27	0	22	20	20	18	20	20	22	22	22	21	21	21	22	21	21	23	24	21	23	22	20	24	22	21	23	24	22	22	21	22	23	24	23	21	21	22	11	13
P68366	P68366	25	5	5	Tubulin alpha-4A chain	TUBA4A	Tubulin alpha-4A chain	1	25	5	5	20	20	19	17	19	18	19	21	19	19	19	18	19	17	19	19	22	17	20	19	18	20	19	17	21	22	22	21	21	22	23	23	23	20	20	21	10	12
P68371	P68371	25	25	1	Tubulin beta-4B chain	TUBB4B	Tubulin beta-4B chain	1	25	25	1	22	22	24	20	19	20	22	23	21	22	23	22	24	20	22	24	23	20	22	22	21	23	21	19	23	24	23	22	20	22	24	21	22	23	21	24	11	13
P68400;Q8NEV1	P68400;Q8NEV1	10;9	10;9	9;8	Casein kinase II subunit alpha;Casein kinase II subunit alpha 3	CSNK2A1;CSNK2A3	Casein kinase II subunit alpha;Casein kinase II subunit alpha 3	2	10	10	9	4	8	5	5	6	5	9	5	7	4	7	5	9	10	8	9	10	7	9	6	8	9	7	8	6	3	7	3	5	4	2	7	1	7	1	2	3	4
P68402	P68402	2	2	2	Platelet-activating factor acetylhydrolase IB subunit beta	PAFAH1B2	Platelet-activating factor acetylhydrolase IB subunit beta	1	2	2	2	1	1	1	1	0	2	0	1	1	1	1	1	0	0	0	0	0	0	0	0	0	0	0	0	0	0	1	1	0	0	1	2	1	0	1	2	0	1
P68431;Q16695;Q6NXT2	P68431;Q16695	4;3;1	1;0;0	1;0;0	Histone H3.1;Histone H3.1t	HIST1H3A;HIST3H3	Histone H3.1;Histone H3.1t	3	4	1	1	4	4	3	3	4	3	4	3	3	4	3	3	4	4	4	4	3	4	3	3	4	4	4	3	4	3	3	4	3	3	3	3	3	3	3	4	1	1
P68871;P02042	P68871;P02042	7;5	5;3	5;3	Hemoglobin subunit beta;LVV-hemorphin-7;Spinorphin;Hemoglobin subunit delta	HBB;HBD	Hemoglobin subunit beta;Hemoglobin subunit delta	2	7	5	5	3	3	3	4	3	3	3	3	3	3	3	3	3	3	2	3	2	3	3	2	3	3	2	2	2	2	2	2	0	1	1	1	1	2	1	1	2	1
Q5JPE7;P69849;Q15155	Q5JPE7;P69849;Q15155	25;25;24	25;25;24	25;25;24	Nodal modulator 2;Nodal modulator 3;Nodal modulator 1	NOMO2;NOMO3;NOMO1	Nodal modulator 2;Nodal modulator 3;Nodal modulator 1	3	25	25	25	2	3	2	2	0	0	4	5	3	1	2	3	9	8	7	10	12	10	5	5	7	9	8	9	13	9	5	5	7	8	9	12	3	15	6	10	10	10
P69905	P69905	4	1	1	Hemoglobin subunit alpha	HBA1	Hemoglobin subunit alpha	1	4	1	1	4	3	3	4	3	3	3	3	3	4	3	3	3	3	3	4	3	3	3	4	3	3	3	3	0	2	1	2	1	1	1	1	1	1	1	1	1	2
P78310	P78310	12	12	12	Coxsackievirus and adenovirus receptor	CXADR	Coxsackievirus and adenovirus receptor	1	12	12	12	12	11	12	10	12	11	12	10	10	10	12	11	0	0	0	0	0	0	0	0	0	0	0	0	1	3	3	2	2	1	1	1	3	2	2	2	1	1
P78324	P78324	1	1	1	Tyrosine-protein phosphatase non-receptor type substrate 1	SIRPA	Tyrosine-protein phosphatase non-receptor type substrate 1	1	1	1	1	0	0	1	0	0	1	0	1	1	0	0	1	0	0	0	0	0	0	0	0	0	0	0	0	0	0	0	0	0	0	0	0	0	0	0	0	0	1
P78347	P78347	2	2	2	General transcription factor II-I	GTF2I	General transcription factor II-I	1	2	2	2	0	2	1	0	1	1	1	0	1	1	1	1	2	2	2	2	1	1	2	1	2	2	2	2	0	0	0	0	0	0	0	0	0	0	0	0	0	0
P78368;Q9HCP0;Q9Y6M4	P78368;Q9HCP0;Q9Y6M4	3;2;2	3;2;2	3;2;2	Casein kinase I isoform gamma-2;Casein kinase I isoform gamma-1;Casein kinase I isoform gamma-3	CSNK1G2;CSNK1G1;CSNK1G3	Casein kinase I isoform gamma-2;Casein kinase I isoform gamma-1;Casein kinase I isoform gamma-3	3	3	3	3	3	2	2	1	1	1	2	3	1	1	2	1	1	3	2	2	2	2	2	0	0	2	2	3	0	0	1	0	0	0	0	0	0	0	1	1	0	0
P78371	P78371	27	27	27	T-complex protein 1 subunit beta	CCT2	T-complex protein 1 subunit beta	1	27	27	27	16	22	18	12	13	14	20	22	20	18	19	14	13	13	12	14	17	11	13	14	18	15	13	9	24	22	22	20	21	20	23	22	22	19	23	20	5	7
P78417	P78417	3	3	3	Glutathione S-transferase omega-1	GSTO1	Glutathione S-transferase omega-1	1	3	3	3	2	2	2	2	2	2	2	3	2	1	2	2	1	0	1	0	0	1	0	0	1	0	0	0	2	2	2	1	2	1	2	2	1	1	2	2	2	2
P78509	P78509	2	2	2	Reelin	RELN	Reelin	1	2	2	2	0	0	0	0	0	0	0	0	0	0	0	0	1	1	1	1	1	1	2	2	0	1	2	1	0	0	0	0	0	0	0	0	0	0	0	0	0	0
P78527	P78527	136	136	136	DNA-dependent protein kinase catalytic subunit	PRKDC	DNA-dependent protein kinase catalytic subunit	1	136	136	136	48	104	75	19	33	45	86	91	83	64	79	62	86	84	86	91	103	85	86	83	118	86	93	72	89	88	91	88	75	83	89	89	80	51	89	79	5	2
P78536	P78536	2	2	2	Disintegrin and metalloproteinase domain-containing protein 17	ADAM17	Disintegrin and metalloproteinase domain-containing protein 17	1	2	2	2	0	0	0	0	0	1	0	1	0	0	0	1	0	1	0	1	0	0	0	0	0	0	0	0	0	0	0	2	2	0	0	1	1	2	0	1	0	0
P78562	P78562	1	1	1	Phosphate-regulating neutral endopeptidase	PHEX	Phosphate-regulating neutral endopeptidase PHEX	1	1	1	1	1	1	0	0	0	0	0	0	0	0	0	0	0	0	0	0	0	0	0	0	0	0	0	0	1	1	1	1	1	1	1	1	1	1	1	1	1	1
P80303	P80303	11	11	11	Nucleobindin-2;Nesfatin-1	NUCB2	Nucleobindin-2	1	11	11	11	8	7	10	8	10	10	9	9	10	10	7	8	9	9	9	9	9	8	9	8	7	9	9	9	6	5	6	6	6	7	5	7	5	6	4	5	3	3
P80404	P80404	2	2	2	4-aminobutyrate aminotransferase, mitochondrial	ABAT	4-aminobutyrate aminotransferase, mitochondrial	1	2	2	2	0	0	0	0	0	0	0	0	0	0	0	0	0	0	0	0	0	1	0	0	0	0	0	0	0	0	0	0	0	0	0	0	0	0	0	0	0	0
P80723	P80723	13	13	13	Brain acid soluble protein 1	BASP1	Brain acid soluble protein 1	1	13	13	13	12	10	10	9	10	11	11	10	10	11	11	11	7	4	4	5	6	6	6	5	6	7	7	7	2	3	5	3	5	5	3	4	5	5	4	6	3	4
P81605	P81605	3	3	3	Dermcidin;Survival-promoting peptide;DCD-1	DCD	Dermcidin	1	3	3	3	3	3	3	2	3	2	1	2	3	1	3	3	2	2	2	1	2	2	1	3	0	2	3	2	2	2	2	0	1	1	1	1	1	3	3	1	1	0
P82650	P82650	3	3	3	28S ribosomal protein S22, mitochondrial	MRPS22	28S ribosomal protein S22, mitochondrial	1	3	3	3	0	0	0	0	0	0	0	0	0	0	0	0	0	0	0	0	0	1	0	0	0	0	0	1	0	0	0	0	0	0	0	0	0	0	0	0	2	1
P82663	P82663	3	3	3	28S ribosomal protein S25, mitochondrial	MRPS25	28S ribosomal protein S25, mitochondrial	1	3	3	3	0	0	0	1	0	1	0	0	0	0	0	0	0	0	0	0	0	0	0	0	0	0	0	0	0	0	0	0	0	0	0	0	0	0	0	0	3	2
P82673	P82673	3	3	3	28S ribosomal protein S35, mitochondrial	MRPS35	28S ribosomal protein S35, mitochondrial	1	3	3	3	0	0	0	0	0	0	0	0	0	0	0	0	0	0	0	0	0	0	0	0	0	0	0	0	0	0	0	0	0	0	0	0	0	0	0	0	3	3
P82932	P82932	2	2	2	28S ribosomal protein S6, mitochondrial	MRPS6	28S ribosomal protein S6, mitochondrial	1	2	2	2	0	0	0	0	0	0	0	0	0	0	0	0	0	0	0	0	0	0	0	0	0	0	0	0	0	0	0	0	0	0	0	0	0	0	0	0	0	0
P82933	P82933	5	5	5	28S ribosomal protein S9, mitochondrial	MRPS9	28S ribosomal protein S9, mitochondrial	1	5	5	5	1	1	1	1	1	1	1	1	1	0	0	0	0	0	0	0	0	1	0	1	0	2	0	0	0	1	0	1	0	0	0	0	0	0	0	0	2	2
P83731	P83731	5	5	5	60S ribosomal protein L24	RPL24	60S ribosomal protein L24	1	5	5	5	3	4	2	4	3	4	3	3	4	2	4	3	4	3	4	3	3	4	4	4	4	3	3	3	5	4	3	3	4	3	4	4	3	3	4	4	2	2
Q969Q0;P83881	Q969Q0;P83881	2;2	2;2	2;2	60S ribosomal protein L36a-like;60S ribosomal protein L36a	RPL36AL;RPL36A	60S ribosomal protein L36a-like;60S ribosomal protein L36a	2	2	2	2	1	1	1	1	1	1	1	1	1	1	1	1	1	1	2	2	2	2	1	2	2	1	1	1	2	2	2	2	2	2	2	2	2	2	2	2	0	0
P84077	P84077	13	13	1	ADP-ribosylation factor 1	ARF1	ADP-ribosylation factor 1	1	13	13	1	11	11	12	12	12	11	12	11	11	12	12	11	9	10	7	9	11	9	10	9	11	9	10	8	10	10	11	11	10	10	10	10	11	9	10	10	4	2
P84085	P84085	11	5	5	ADP-ribosylation factor 5	ARF5	ADP-ribosylation factor 5	1	11	5	5	9	9	8	9	9	9	9	10	8	10	10	10	7	6	5	6	8	7	8	7	6	7	9	6	6	4	5	5	4	5	6	5	5	5	6	5	3	2
P84090	P84090	3	3	3	Enhancer of rudimentary homolog	ERH	Enhancer of rudimentary homolog	1	3	3	3	2	2	2	1	2	2	2	1	2	1	2	0	1	0	0	0	0	0	0	0	0	0	0	0	0	0	0	1	0	0	1	0	1	0	0	0	0	0
P84095	P84095	12	12	11	Rho-related GTP-binding protein RhoG	RHOG	Rho-related GTP-binding protein RhoG	1	12	12	11	9	10	8	10	9	9	10	11	11	10	11	9	8	6	6	9	7	6	6	4	5	8	7	7	3	3	3	4	4	4	2	2	5	4	5	6	2	4
P84098	P84098	6	6	6	60S ribosomal protein L19	RPL19	60S ribosomal protein L19	1	6	6	6	1	3	0	0	2	2	2	2	2	2	0	1	5	5	4	5	5	3	2	2	2	2	4	3	4	3	3	4	3	2	2	4	3	3	4	6	1	1
P84243	P84243	4	1	1	Histone H3.3	H3F3A	Histone H3.3	1	4	1	1	4	4	3	3	4	3	4	3	3	4	3	3	4	4	4	4	3	4	3	3	4	4	4	3	4	3	3	4	3	3	3	3	3	3	3	4	1	1
P98160	P98160	170	170	170	Basement membrane-specific heparan sulfate proteoglycan core protein;Endorepellin;LG3 peptide	HSPG2	Basement membrane-specific heparan sulfate proteoglycan core protein	1	170	170	170	97	124	95	80	64	76	95	86	71	68	61	82	135	126	127	139	138	130	122	132	144	139	135	118	141	143	138	139	144	143	139	131	133	132	136	140	42	56
P98172	P98172	7	7	6	Ephrin-B1	EFNB1	Ephrin-B1	1	7	7	6	3	2	2	3	3	3	4	2	3	4	5	4	1	1	1	0	1	0	1	0	0	0	0	0	1	4	4	4	3	3	3	3	3	3	3	4	0	0
P98194	P98194	3	3	3	Calcium-transporting ATPase type 2C member 1	ATP2C1	Calcium-transporting ATPase type 2C member 1	1	3	3	3	0	1	0	0	0	0	1	1	1	2	1	0	3	2	2	3	3	2	3	2	2	3	2	2	0	0	0	0	0	0	0	0	0	0	0	0	0	1
P99999;CON__P62894	P99999	7;1	7;1	7;1	Cytochrome c	CYCS	Cytochrome c	2	7	7	7	1	1	0	1	0	1	1	0	0	1	0	0	0	0	0	0	0	0	0	0	0	0	0	0	0	0	0	0	0	0	1	0	0	0	0	0	5	5
Q00013	Q00013	5	5	5	55 kDa erythrocyte membrane protein	MPP1	55 kDa erythrocyte membrane protein	1	5	5	5	2	2	1	1	1	3	3	4	4	2	4	4	0	0	0	1	0	0	0	0	0	1	0	0	1	0	0	0	0	0	0	0	0	0	0	0	0	0
Q00325	Q00325	5	5	5	Phosphate carrier protein, mitochondrial	SLC25A3	Phosphate carrier protein, mitochondrial	1	5	5	5	2	1	1	2	1	1	2	2	1	1	2	2	2	2	2	2	3	2	1	2	2	2	2	2	0	0	0	0	0	0	0	0	1	2	0	0	4	3
Q00535	Q00535	5	4	4	Cyclin-dependent-like kinase 5	CDK5	Cyclin-dependent-like kinase 5	1	5	4	4	2	3	2	1	1	1	3	4	3	2	2	2	3	1	1	1	2	3	1	2	3	2	2	1	1	1	1	2	1	1	1	0	1	1	2	1	1	2
Q00577	Q00577	1	1	1	Transcriptional activator protein Pur-alpha	PURA	Transcriptional activator protein Pur-alpha	1	1	1	1	0	0	0	0	0	0	0	0	0	0	0	0	1	0	0	0	0	0	0	0	0	0	0	0	0	0	0	0	0	0	0	0	0	0	0	0	0	0
Q00610;P53675	Q00610	89;17	89;17	89;17	Clathrin heavy chain 1	CLTC	Clathrin heavy chain 1	2	89	89	89	61	64	66	49	49	56	69	73	69	61	68	58	57	49	51	62	62	50	56	54	60	67	56	50	73	72	69	68	66	66	61	71	66	63	66	73	22	19
Q00765	Q00765	6	6	6	Receptor expression-enhancing protein 5	REEP5	Receptor expression-enhancing protein 5	1	6	6	6	1	2	2	2	2	2	2	2	3	2	2	3	6	5	5	5	5	5	5	4	5	5	5	5	2	3	3	2	3	3	3	3	3	2	3	3	1	1
Q00839	Q00839	17	17	17	Heterogeneous nuclear ribonucleoprotein U	HNRNPU	Heterogeneous nuclear ribonucleoprotein U	1	17	17	17	9	11	10	6	8	8	13	11	8	8	9	11	12	11	12	13	14	13	12	12	11	11	13	8	14	8	8	6	8	7	11	13	8	10	9	9	1	1
Q00872	Q00872	6	6	5	Myosin-binding protein C, slow-type	MYBPC1	Myosin-binding protein C, slow-type	1	6	6	5	0	0	0	0	6	0	0	0	0	0	0	0	0	0	1	0	0	0	1	0	0	0	0	1	0	0	0	0	0	0	0	0	0	0	0	0	0	1
Q01082	Q01082	3	3	3	Spectrin beta chain, non-erythrocytic 1	SPTBN1	Spectrin beta chain, non-erythrocytic 1	1	3	3	3	1	1	2	2	2	2	2	1	2	2	1	1	0	0	0	0	1	0	0	1	0	0	0	0	0	0	0	0	0	0	0	0	1	0	0	0	0	1
Q01130;Q9BRL6	Q01130	3;1	3;1	3;1	Serine/arginine-rich splicing factor 2	SRSF2	Serine/arginine-rich splicing factor 2	2	3	3	3	1	0	0	0	0	0	3	1	0	0	0	0	1	1	1	0	1	0	1	0	0	0	1	1	0	0	0	0	0	0	0	0	0	0	0	0	0	0
Q01469	Q01469	5	5	5	Fatty acid-binding protein, epidermal	FABP5	Fatty acid-binding protein 5	1	5	5	5	3	5	5	4	5	5	5	5	5	5	4	5	1	2	1	1	1	2	1	1	1	1	2	1	2	4	2	1	3	1	1	2	1	4	2	1	1	2
Q01518	Q01518	11	11	11	Adenylyl cyclase-associated protein 1	CAP1	Adenylyl cyclase-associated protein 1	1	11	11	11	7	6	6	3	6	8	7	8	8	8	8	8	5	3	3	5	4	4	4	3	4	5	4	4	4	5	5	4	5	4	2	2	3	4	4	4	5	8
Q01581;P54868	Q01581;P54868	2;1	2;1	2;1	Hydroxymethylglutaryl-CoA synthase, cytoplasmic;Hydroxymethylglutaryl-CoA synthase, mitochondrial	HMGCS1;HMGCS2	Hydroxymethylglutaryl-CoA synthase, cytoplasmic;Hydroxymethylglutaryl-CoA synthase, mitochondrial	2	2	2	2	0	1	0	0	0	0	0	1	1	0	1	0	1	1	2	2	1	1	2	1	0	2	1	1	0	0	0	0	0	0	0	0	0	0	0	0	0	0
Q01650;Q8MH63;Q9GIP4;Q9UM01	Q01650	10;1;1;1	10;1;1;1	9;1;1;0	Large neutral amino acids transporter small subunit 1	SLC7A5	Large neutral amino acids transporter small subunit 1	4	10	10	9	6	7	8	8	6	8	7	7	7	6	8	7	7	8	8	9	10	9	8	10	8	10	9	7	6	8	7	6	7	7	6	7	6	7	6	6	5	6
Q01813	Q01813	14	14	12	ATP-dependent 6-phosphofructokinase, platelet type	PFKP	ATP-dependent 6-phosphofructokinase, platelet type	1	14	14	12	1	3	1	0	1	0	3	4	3	2	1	2	8	5	5	7	8	4	4	6	3	6	6	3	5	6	8	5	8	6	6	8	5	4	4	5	4	4
Q01970	Q01970	3	3	3	1-phosphatidylinositol 4,5-bisphosphate phosphodiesterase beta-3	PLCB3	1-phosphatidylinositol 4,5-bisphosphate phosphodiesterase beta-3	1	3	3	3	2	1	2	0	0	0	3	3	3	1	3	3	0	0	0	0	0	0	1	1	0	0	0	0	0	0	0	0	0	0	0	0	0	0	0	0	0	0
Q02218	Q02218	11	11	9	2-oxoglutarate dehydrogenase, mitochondrial	OGDH	2-oxoglutarate dehydrogenase, mitochondrial	1	11	11	9	0	0	0	0	0	0	0	0	0	0	0	0	0	0	0	0	0	0	0	0	0	1	0	0	0	0	0	0	0	0	0	0	0	0	0	0	7	8
Q02224	Q02224	2	2	2	Centromere-associated protein E	CENPE	Centromere-associated protein E	1	2	2	2	0	0	0	0	0	0	0	0	0	0	0	0	0	0	1	0	0	0	0	0	0	0	1	0	0	0	0	0	0	0	0	0	0	0	0	0	0	0
Q02241	Q02241	27	27	27	Kinesin-like protein KIF23	KIF23	Kinesin-like protein KIF23	1	27	27	27	18	20	16	11	14	19	19	24	19	19	21	19	10	8	10	13	11	10	8	9	9	12	11	7	1	4	6	3	6	8	6	2	4	3	6	5	7	9
Q02413	Q02413	18	18	18	Desmoglein-1	DSG1	Desmoglein-1	1	18	18	18	11	7	5	17	11	10	6	5	8	12	3	18	2	2	0	0	2	0	1	2	0	1	2	7	2	2	0	0	1	3	1	3	2	1	8	0	1	1
Q02543	Q02543	11	11	11	60S ribosomal protein L18a	RPL18A	60S ribosomal protein L18a	1	11	11	11	3	4	2	2	2	3	4	3	4	4	5	4	9	9	9	10	10	9	9	8	9	7	7	7	9	7	8	4	4	5	7	8	4	6	6	4	3	2
Q02790	Q02790	10	10	10	Peptidyl-prolyl cis-trans isomerase FKBP4;Peptidyl-prolyl cis-trans isomerase FKBP4, N-terminally processed	FKBP4	Peptidyl-prolyl cis-trans isomerase FKBP4	1	10	10	10	4	6	5	4	3	4	7	7	8	5	8	5	3	4	1	4	4	2	4	3	3	5	4	3	1	2	1	2	2	3	2	3	2	2	1	2	1	1
Q02809	Q02809	17	17	17	Procollagen-lysine,2-oxoglutarate 5-dioxygenase 1	PLOD1	Procollagen-lysine,2-oxoglutarate 5-dioxygenase 1	1	17	17	17	1	1	0	0	1	0	0	0	0	0	0	0	1	1	1	3	2	3	2	3	3	4	1	2	8	12	7	12	10	12	11	11	9	9	13	10	10	12
Q02818	Q02818	21	21	21	Nucleobindin-1	NUCB1	Nucleobindin-1	1	21	21	21	10	10	13	9	9	14	9	13	9	7	10	11	18	18	18	18	19	20	20	19	17	19	18	19	15	15	15	15	16	14	12	17	14	14	14	14	8	6
Q02878	Q02878	8	8	8	60S ribosomal protein L6	RPL6	60S ribosomal protein L6	1	8	8	8	3	5	5	1	1	4	3	5	3	3	5	4	7	6	7	7	7	7	7	7	7	7	7	7	6	2	3	4	4	4	4	6	4	4	4	3	5	6
Q02880	Q02880	13	7	7	DNA topoisomerase 2-beta	TOP2B	DNA topoisomerase 2-beta	1	13	7	7	4	10	3	2	3	3	8	5	1	4	4	4	10	7	8	8	9	6	8	5	12	8	7	8	1	1	1	1	1	1	1	1	1	1	1	2	0	0
Q02952	Q02952	10	10	10	A-kinase anchor protein 12	AKAP12	A-kinase anchor protein 12	1	10	10	10	8	8	9	6	8	8	9	9	8	7	9	9	0	1	1	1	1	1	1	1	1	1	1	1	1	1	1	1	1	1	1	1	1	1	1	1	3	1
Q02978	Q02978	3	3	3	Mitochondrial 2-oxoglutarate/malate carrier protein	SLC25A11	Mitochondrial 2-oxoglutarate/malate carrier protein	1	3	3	3	1	0	0	0	0	0	0	0	0	0	0	0	0	0	0	0	0	0	0	0	0	0	0	0	0	0	0	0	0	0	0	0	0	0	0	0	1	1
Q03001	Q03001	3	3	3	Dystonin	DST	Dystonin	1	3	3	3	1	1	1	0	0	0	0	1	1	1	0	1	2	2	2	2	2	2	1	1	1	2	2	2	1	1	1	1	1	1	1	1	1	1	1	1	2	2
Q03135	Q03135	7	7	7	Caveolin-1	CAV1	Caveolin-1	1	7	7	7	1	1	2	0	1	2	1	2	1	2	1	0	2	2	2	3	2	2	2	2	1	2	2	3	6	6	5	7	5	6	6	5	5	6	5	6	4	3
Q03405	Q03405	8	8	8	Urokinase plasminogen activator surface receptor	PLAUR	Urokinase plasminogen activator surface receptor	1	8	8	8	2	4	5	2	3	5	4	5	6	3	5	6	0	0	1	0	0	0	0	0	1	0	0	0	4	6	4	3	4	4	3	4	3	4	4	4	2	5
Q03701	Q03701	5	5	5	CCAAT/enhancer-binding protein zeta	CEBPZ	CCAAT/enhancer-binding protein zeta	1	5	5	5	0	1	0	0	0	0	0	1	0	0	0	0	4	2	3	4	3	3	2	3	5	3	3	3	0	1	0	0	0	0	0	2	0	0	0	0	0	0
Q04637	Q04637	4	4	4	Eukaryotic translation initiation factor 4 gamma 1	EIF4G1	Eukaryotic translation initiation factor 4 gamma 1	1	4	4	4	2	2	2	1	1	1	2	2	1	2	2	2	1	0	0	0	0	0	0	1	0	1	1	0	2	1	1	1	1	1	1	2	1	2	0	1	0	0
Q04721;P0DPK4;P0DPK3;Q7Z3S9	Q04721	14;1;1;1	14;1;1;1	14;1;1;1	Neurogenic locus notch homolog protein 2;Notch 2 extracellular truncation;Notch 2 intracellular domain	NOTCH2	Neurogenic locus notch homolog protein 2	4	14	14	14	10	11	10	6	6	7	10	13	13	10	12	10	2	3	4	4	4	4	2	3	2	4	2	1	0	2	1	0	2	0	2	0	1	1	1	0	1	0
Q04760	Q04760	10	10	10	Lactoylglutathione lyase	GLO1	Lactoylglutathione lyase	1	10	10	10	8	6	10	8	10	7	8	6	7	7	9	9	1	1	1	1	2	1	0	0	0	1	1	1	1	1	1	1	1	1	1	0	1	0	1	1	2	2
Q04837	Q04837	7	7	7	Single-stranded DNA-binding protein, mitochondrial	SSBP1	Single-stranded DNA-binding protein, mitochondrial	1	7	7	7	4	6	5	6	5	4	6	5	4	3	4	4	1	0	1	0	0	1	1	1	0	0	1	0	4	5	4	4	5	3	4	5	4	5	3	5	4	4
Q04917	Q04917	18	15	15	14-3-3 protein eta	YWHAH	14-3-3 protein eta	1	18	15	15	16	14	14	15	12	14	14	14	14	14	14	16	5	4	6	9	9	5	5	5	8	6	4	7	11	11	8	11	10	11	12	10	12	9	10	11	2	6
Q04941	Q04941	2	2	2	Proteolipid protein 2	PLP2	Proteolipid protein 2	1	2	2	2	0	0	0	0	0	0	0	0	0	0	0	0	0	0	0	0	0	0	0	0	0	0	0	0	1	1	1	2	2	1	1	1	1	1	1	2	2	1
Q05639	Q05639	11	1	1	Elongation factor 1-alpha 2	EEF1A2	Elongation factor 1-alpha 2	1	11	1	1	9	7	8	7	7	5	8	8	8	6	8	8	8	5	7	9	8	8	8	9	8	8	8	7	6	6	6	6	6	6	6	7	5	6	6	6	5	3
Q06033	Q06033	5	1	1	Inter-alpha-trypsin inhibitor heavy chain H3	ITIH3	Inter-alpha-trypsin inhibitor heavy chain H3	1	5	1	1	3	4	3	3	4	4	4	3	4	4	4	4	4	4	4	4	4	4	4	4	4	4	4	4	4	2	3	2	4	2	3	3	4	3	3	2	2	2
Q06124	Q06124	4	4	4	Tyrosine-protein phosphatase non-receptor type 11	PTPN11	Tyrosine-protein phosphatase non-receptor type 11	1	4	4	4	2	2	1	1	2	1	3	2	1	1	2	3	0	0	0	0	0	0	0	1	0	1	1	0	0	0	0	0	1	0	0	0	0	0	0	0	1	0
Q06187	Q06187	4	3	3	Tyrosine-protein kinase BTK	BTK	Tyrosine-protein kinase BTK	1	4	3	3	1	1	1	1	1	1	1	1	1	1	1	1	1	0	1	1	1	1	1	1	1	1	0	1	1	3	2	3	2	3	2	3	2	2	4	2	0	0
Q06203	Q06203	1	1	1	Amidophosphoribosyltransferase	PPAT	Amidophosphoribosyltransferase	1	1	1	1	0	0	1	0	1	0	1	1	0	0	1	0	0	0	0	0	0	0	0	0	0	0	0	0	0	0	0	0	0	0	1	0	0	0	0	1	0	0
Q06210;O94808	Q06210	9;3	9;3	9;3	Glutamine--fructose-6-phosphate aminotransferase [isomerizing] 1	GFPT1	Glutamine--fructose-6-phosphate aminotransferase [isomerizing] 1	2	9	9	9	2	3	2	0	0	0	4	3	1	3	1	1	3	5	4	4	7	4	3	4	5	5	4	4	1	2	2	3	0	3	1	4	1	1	1	4	0	0
Q06323	Q06323	3	3	3	Proteasome activator complex subunit 1	PSME1	Proteasome activator complex subunit 1	1	3	3	3	2	1	3	1	1	2	2	2	2	2	2	2	1	1	1	1	1	1	1	1	1	2	1	1	1	1	1	1	2	1	0	1	0	1	1	1	0	1
Q06481	Q06481	14	14	13	Amyloid-like protein 2	APLP2	Amyloid-like protein 2	1	14	14	13	7	9	12	7	6	9	9	11	10	10	8	8	6	6	6	9	8	6	7	8	7	8	5	4	0	1	0	1	3	0	1	1	1	1	2	1	0	1
Q06830	Q06830	14	14	10	Peroxiredoxin-1	PRDX1	Peroxiredoxin-1	1	14	14	10	11	13	13	12	12	10	13	12	11	13	14	11	7	7	7	8	8	6	7	7	8	12	10	6	9	8	7	8	8	9	6	7	6	6	7	6	8	8
Q07020	Q07020	9	9	9	60S ribosomal protein L18	RPL18	60S ribosomal protein L18	1	9	9	9	5	6	4	3	5	4	5	4	3	5	4	3	9	7	8	8	9	8	7	7	8	7	8	8	8	6	5	6	4	5	6	8	4	7	6	6	5	6
Q07021	Q07021	9	9	9	Complement component 1 Q subcomponent-binding protein, mitochondrial	C1QBP	Complement component 1 Q subcomponent-binding protein, mitochondrial	1	9	9	9	1	2	1	1	1	1	3	3	3	0	3	3	3	1	2	2	2	2	0	1	4	1	2	2	7	5	4	4	4	3	3	4	1	3	3	4	4	3
Q07065;Q96K21	Q07065	32;1	32;1	32;1	Cytoskeleton-associated protein 4	CKAP4	Cytoskeleton-associated protein 4	2	32	32	32	17	18	14	16	13	15	19	15	21	12	13	17	13	12	10	18	20	16	12	16	19	16	13	12	24	24	22	20	24	22	21	21	18	25	19	15	21	23
Q07666	Q07666	2	2	2	KH domain-containing, RNA-binding, signal transduction-associated protein 1	KHDRBS1	KH domain-containing, RNA-binding, signal transduction-associated protein 1	1	2	2	2	0	2	1	0	1	1	1	1	1	1	0	0	0	0	0	0	0	0	0	0	0	0	0	0	0	0	0	0	0	0	0	0	0	0	0	0	0	0
Q07954	Q07954	43	43	43	Prolow-density lipoprotein receptor-related protein 1;Low-density lipoprotein receptor-related protein 1 85 kDa subunit;Low-density lipoprotein receptor-related protein 1 515 kDa subunit;Low-density lipoprotein receptor-related protein 1 intracellular domain	LRP1	Prolow-density lipoprotein receptor-related protein 1	1	43	43	43	21	24	12	5	11	17	26	25	30	26	25	18	17	16	20	18	20	17	19	17	16	17	18	18	5	8	5	7	4	6	8	4	6	8	6	3	1	2
Q07955	Q07955	4	4	4	Serine/arginine-rich splicing factor 1	SRSF1	Serine/arginine-rich splicing factor 1	1	4	4	4	4	2	3	2	1	3	4	2	3	3	1	4	2	2	3	4	4	4	1	3	2	4	4	4	0	0	0	0	0	0	0	0	0	0	0	0	0	0
Q08043	Q08043	11	4	4	Alpha-actinin-3	ACTN3	Alpha-actinin-3	1	11	4	4	2	2	3	3	8	2	3	4	3	5	3	4	1	0	1	1	2	2	1	0	2	4	1	0	5	4	5	3	4	4	2	6	4	5	4	4	5	4
Q08174	Q08174	1	1	1	Protocadherin-1	PCDH1	Protocadherin-1	1	1	1	1	0	0	0	0	0	0	0	0	0	0	0	0	0	0	0	0	0	0	0	0	0	0	0	0	0	1	1	1	1	1	0	1	1	1	0	1	0	0
Q08188	Q08188	3	3	3	Protein-glutamine gamma-glutamyltransferase E;Protein-glutamine gamma-glutamyltransferase E 50 kDa catalytic chain;Protein-glutamine gamma-glutamyltransferase E 27 kDa non-catalytic chain	TGM3	Protein-glutamine gamma-glutamyltransferase E	1	3	3	3	0	0	0	2	0	0	0	0	1	0	0	3	0	0	0	0	0	0	0	0	0	0	0	0	0	0	0	0	0	0	0	0	1	0	0	0	0	0
Q08209;P48454;P16298	Q08209;P48454;P16298	4;3;3	4;3;3	4;3;3	Serine/threonine-protein phosphatase 2B catalytic subunit alpha isoform;Serine/threonine-protein phosphatase 2B catalytic subunit gamma isoform;Serine/threonine-protein phosphatase 2B catalytic subunit beta isoform	PPP3CA;PPP3CC;PPP3CB	Serine/threonine-protein phosphatase 2B catalytic subunit alpha isoform;Serine/threonine-protein phosphatase 2B catalytic subunit gamma isoform;Serine/threonine-protein phosphatase 2B catalytic subunit beta isoform	3	4	4	4	3	2	2	2	1	3	2	3	2	1	2	1	0	2	0	1	1	0	0	1	0	1	1	2	0	2	2	1	0	2	0	2	0	1	2	1	1	2
Q08211	Q08211	28	28	28	ATP-dependent RNA helicase A	DHX9	ATP-dependent RNA helicase A	1	28	28	28	9	19	11	2	4	3	16	15	13	14	12	12	17	17	17	20	19	15	14	19	18	20	19	16	20	18	20	18	18	20	18	18	17	9	19	21	2	2
Q08257	Q08257	4	4	4	Quinone oxidoreductase	CRYZ	Quinone oxidoreductase	1	4	4	4	0	0	0	0	0	0	0	0	0	1	0	0	0	0	0	0	0	0	0	0	0	0	0	0	0	0	0	0	0	0	0	0	0	0	0	0	2	0
Q08345	Q08345	3	3	3	Epithelial discoidin domain-containing receptor 1	DDR1	Epithelial discoidin domain-containing receptor 1	1	3	3	3	0	1	0	0	0	0	0	0	0	0	0	0	2	2	3	3	3	2	2	2	3	3	2	2	1	0	0	0	1	1	0	0	0	1	0	0	0	1
Q08379	Q08379	3	3	3	Golgin subfamily A member 2	GOLGA2	Golgin subfamily A member 2	1	3	3	3	0	0	0	0	0	0	0	0	0	0	0	0	1	2	1	3	2	2	1	2	2	1	2	0	1	0	0	0	0	0	0	1	0	0	0	1	0	0
Q08380	Q08380	32	32	32	Galectin-3-binding protein	LGALS3BP	Galectin-3-binding protein	1	32	32	32	25	24	24	21	21	23	23	24	23	22	24	24	20	17	18	19	20	18	19	20	19	19	18	18	29	30	29	29	31	31	30	31	29	31	30	31	14	15
Q08431	Q08431	29	29	29	Lactadherin;Lactadherin short form;Medin	MFGE8	Lactadherin	1	29	29	29	27	28	28	25	26	27	28	28	28	27	28	28	14	13	15	20	20	14	18	18	15	20	16	11	25	26	24	24	24	24	24	21	23	25	24	25	12	14
Q08554	Q08554	8	8	8	Desmocollin-1	DSC1	Desmocollin-1	1	8	8	8	3	1	0	8	5	4	2	0	3	5	0	8	1	1	0	0	1	0	0	0	0	0	1	3	2	1	0	0	1	2	1	2	0	1	1	0	0	0
Q08722	Q08722	2	2	2	Leukocyte surface antigen CD47	CD47	Leukocyte surface antigen CD47	1	2	2	2	2	1	2	2	2	2	2	1	2	2	2	2	2	2	2	2	2	2	2	2	2	2	2	2	2	2	2	2	2	2	2	1	2	2	2	1	2	2
Q08945	Q08945	7	7	7	FACT complex subunit SSRP1	SSRP1	FACT complex subunit SSRP1	1	7	7	7	1	5	3	2	0	1	2	4	3	0	2	0	4	4	3	4	5	3	3	3	6	3	1	4	2	0	0	0	0	0	0	0	0	0	0	1	0	0
Q09666	Q09666	36	36	36	Neuroblast differentiation-associated protein AHNAK	AHNAK	Neuroblast differentiation-associated protein AHNAK	1	36	36	36	3	4	5	2	2	1	3	5	4	3	7	5	7	5	7	11	6	8	6	5	9	9	8	11	9	10	9	9	11	12	6	8	5	8	9	9	17	18
Q10471	Q10471	10	10	10	Polypeptide N-acetylgalactosaminyltransferase 2;Polypeptide N-acetylgalactosaminyltransferase 2 soluble form	GALNT2	Polypeptide N-acetylgalactosaminyltransferase 2	1	10	10	10	1	0	2	0	0	0	4	3	3	1	3	3	3	2	0	2	4	2	2	2	2	1	1	1	6	4	5	5	4	4	5	7	3	4	3	3	4	5
Q10472	Q10472	2	2	2	Polypeptide N-acetylgalactosaminyltransferase 1;Polypeptide N-acetylgalactosaminyltransferase 1 soluble form	GALNT1	Polypeptide N-acetylgalactosaminyltransferase 1	1	2	2	2	0	1	0	0	0	1	1	1	0	1	1	1	1	0	0	1	1	1	1	1	1	0	1	0	1	1	1	1	1	0	0	1	1	1	0	1	1	0
Q10567	Q10567	9	3	3	AP-1 complex subunit beta-1	AP1B1	AP-1 complex subunit beta-1	1	9	3	3	4	6	7	4	5	3	6	7	6	5	7	6	4	2	3	5	6	1	3	2	1	5	4	3	3	1	0	2	2	5	4	4	3	2	2	4	2	2
Q10713	Q10713	3	3	3	Mitochondrial-processing peptidase subunit alpha	PMPCA	Mitochondrial-processing peptidase subunit alpha	1	3	3	3	0	0	0	0	0	0	0	0	0	0	0	0	0	0	0	0	0	0	0	0	0	0	0	0	1	1	0	1	0	0	0	1	1	0	1	1	1	0
Q12769	Q12769	1	1	1	Nuclear pore complex protein Nup160	NUP160	Nuclear pore complex protein Nup160	1	1	1	1	0	0	0	0	0	0	0	0	0	0	0	0	1	1	1	0	1	1	1	1	1	1	1	1	1	1	1	1	1	1	1	1	1	1	1	1	0	0
Q12788	Q12788	8	8	8	Transducin beta-like protein 3	TBL3	Transducin beta-like protein 3	1	8	8	8	0	2	0	0	0	0	0	1	0	0	0	0	2	4	4	5	2	3	2	2	5	2	1	2	2	1	0	0	0	0	3	0	0	2	1	1	0	0
Q12792	Q12792	2	2	2	Twinfilin-1	TWF1	Twinfilin-1	1	2	2	2	2	2	0	0	0	0	0	0	2	0	0	1	0	0	0	0	0	0	0	0	0	0	0	0	0	0	0	0	0	0	0	0	0	0	0	0	0	0
Q12797	Q12797	11	11	11	Aspartyl/asparaginyl beta-hydroxylase	ASPH	Aspartyl/asparaginyl beta-hydroxylase	1	11	11	11	1	1	2	1	0	2	3	2	1	2	1	0	0	0	0	0	1	0	0	0	0	0	0	0	8	5	5	3	5	6	3	8	3	7	7	4	10	9
Q12805	Q12805	8	8	8	EGF-containing fibulin-like extracellular matrix protein 1	EFEMP1	EGF-containing fibulin-like extracellular matrix protein 1	1	8	8	8	0	0	0	0	0	0	0	0	1	0	1	0	1	0	1	2	0	1	1	1	0	2	0	2	2	1	2	2	3	4	3	3	2	4	5	4	2	1
Q12846	Q12846	10	10	10	Syntaxin-4	STX4	Syntaxin-4	1	10	10	10	8	10	10	7	9	8	10	10	9	8	9	7	3	4	3	4	6	5	5	4	4	5	5	4	3	1	2	2	3	4	3	3	4	2	1	2	0	1
Q12860	Q12860	3	3	3	Contactin-1	CNTN1	Contactin-1	1	3	3	3	2	2	3	1	2	2	2	2	3	3	3	3	0	0	0	0	0	0	0	0	0	0	0	0	0	0	0	0	0	0	0	1	0	0	0	0	0	0
Q12873	Q12873	3	3	2	Chromodomain-helicase-DNA-binding protein 3	CHD3	Chromodomain-helicase-DNA-binding protein 3	1	3	3	2	0	0	0	0	0	0	0	0	0	0	0	0	1	2	2	1	2	1	1	1	2	1	2	2	1	1	1	0	1	1	0	1	1	1	1	0	1	0
Q12884	Q12884	3	3	3	Prolyl endopeptidase FAP;Antiplasmin-cleaving enzyme FAP, soluble form	FAP	Prolyl endopeptidase FAP	1	3	3	3	1	0	1	0	1	2	1	0	1	1	2	1	0	0	0	0	0	0	0	0	0	0	0	0	1	1	1	1	1	1	0	0	1	1	1	1	0	0
Q12907	Q12907	14	14	14	Vesicular integral-membrane protein VIP36	LMAN2	Vesicular integral-membrane protein VIP36	1	14	14	14	12	11	10	10	10	10	10	10	11	10	10	10	13	13	12	13	14	13	13	12	14	13	13	12	10	10	9	9	9	10	8	11	7	10	8	7	5	6
Q12913	Q12913	1	1	1	Receptor-type tyrosine-protein phosphatase eta	PTPRJ	Receptor-type tyrosine-protein phosphatase eta	1	1	1	1	0	0	0	0	0	0	0	0	0	0	0	0	0	0	0	0	0	0	0	0	0	0	0	0	0	0	0	0	0	0	0	0	0	0	0	0	0	0
Q12931	Q12931	10	10	10	Heat shock protein 75 kDa, mitochondrial	TRAP1	Heat shock protein 75 kDa, mitochondrial	1	10	10	10	0	1	1	0	0	0	1	0	1	0	0	0	0	0	0	0	0	0	0	0	0	0	0	0	0	0	0	0	1	0	0	0	1	0	1	0	6	5
Q12959;Q15700;Q92796	Q12959	18;3;1	18;3;1	17;2;1	Disks large homolog 1	DLG1	Disks large homolog 1	3	18	18	17	8	11	11	7	5	8	11	13	11	10	10	12	7	5	3	8	9	4	4	3	5	9	6	8	1	4	3	2	2	3	3	2	2	5	2	2	2	1
Q12965	Q12965	2	2	2	Unconventional myosin-Ie	MYO1E	Unconventional myosin-Ie	1	2	2	2	0	1	0	0	0	0	0	1	0	0	0	0	0	0	0	0	0	0	0	0	0	0	0	0	2	1	1	1	1	1	2	1	1	0	1	1	1	1
Q12974	Q12974	9	9	6	Protein tyrosine phosphatase type IVA 2	PTP4A2	Protein tyrosine phosphatase type IVA 2	1	9	9	6	7	8	7	5	4	8	8	8	7	8	7	7	2	3	3	3	1	2	3	1	3	3	3	2	0	1	1	0	0	0	0	1	1	1	0	1	1	2
Q13011	Q13011	5	5	5	Delta(3,5)-Delta(2,4)-dienoyl-CoA isomerase, mitochondrial	ECH1	Delta(3,5)-Delta(2,4)-dienoyl-CoA isomerase, mitochondrial	1	5	5	5	0	0	0	0	0	0	0	0	0	0	0	0	0	0	0	0	0	0	0	0	0	0	0	0	4	4	2	3	3	3	2	3	2	2	3	4	3	2
Q13045	Q13045	4	4	4	Protein flightless-1 homolog	FLII	Protein flightless-1 homolog	1	4	4	4	0	1	1	0	1	1	1	3	1	0	2	1	2	2	1	1	1	2	2	1	2	1	1	1	2	2	1	1	2	2	2	2	1	0	2	0	0	0
Q13085	Q13085	19	19	16	Acetyl-CoA carboxylase 1;Biotin carboxylase	ACACA	Acetyl-CoA carboxylase 1	1	19	19	16	1	2	1	0	1	0	2	1	1	1	4	0	4	2	2	3	4	3	4	3	3	2	2	1	15	13	14	13	13	16	11	14	12	5	15	11	1	0
Q13103	Q13103	2	2	2	Secreted phosphoprotein 24	SPP2	Secreted phosphoprotein 24	1	2	2	2	2	2	1	0	1	1	1	0	1	1	1	1	1	1	1	1	1	1	1	1	1	1	1	1	1	1	1	1	1	1	1	1	1	1	1	1	1	1
Q13126	Q13126	2	2	2	S-methyl-5-thioadenosine phosphorylase	MTAP	S-methyl-5-thioadenosine phosphorylase	1	2	2	2	1	1	1	1	1	1	1	2	1	1	1	1	0	1	1	0	1	1	1	1	1	1	1	1	0	0	0	0	0	0	0	0	0	0	0	0	0	0
Q13148	Q13148	4	4	4	TAR DNA-binding protein 43	TARDBP	TAR DNA-binding protein 43	1	4	4	4	1	1	1	0	0	0	0	2	2	1	2	2	2	1	1	2	2	1	1	2	1	2	2	0	0	2	0	1	3	1	1	0	0	1	2	1	0	0
Q13155	Q13155	5	5	5	Aminoacyl tRNA synthase complex-interacting multifunctional protein 2	AIMP2	Aminoacyl tRNA synthase complex-interacting multifunctional protein 2	1	5	5	5	1	4	2	2	0	1	3	3	2	3	3	3	1	1	1	1	3	1	1	1	2	1	2	1	2	2	2	2	1	2	2	3	2	0	2	1	1	1
Q13162	Q13162	13	10	10	Peroxiredoxin-4	PRDX4	Peroxiredoxin-4	1	13	10	10	5	4	7	7	5	5	6	5	4	8	6	7	5	4	4	6	5	5	5	4	5	7	5	6	9	9	8	8	8	8	8	8	8	10	8	7	8	8
Q13177;Q13153;O75914	Q13177;Q13153;O75914	2;1;1	2;1;1	2;1;1	Serine/threonine-protein kinase PAK 2;PAK-2p27;PAK-2p34;Serine/threonine-protein kinase PAK 1;Serine/threonine-protein kinase PAK 3	PAK2;PAK1;PAK3	Serine/threonine-protein kinase PAK 2;Serine/threonine-protein kinase PAK 1;Serine/threonine-protein kinase PAK 3	3	2	2	2	0	0	0	0	0	0	0	0	1	0	1	0	1	1	1	1	1	1	1	1	1	0	1	1	0	0	0	0	0	0	0	0	0	0	0	0	0	0
Q13185;P83916	Q13185;P83916	2;1	2;1	2;1	Chromobox protein homolog 3;Chromobox protein homolog 1	CBX3;CBX1	Chromobox protein homolog 3;Chromobox protein homolog 1	2	2	2	2	0	0	0	0	0	0	1	1	1	1	1	0	1	0	1	1	0	1	1	1	1	1	0	1	1	0	1	1	0	1	1	1	1	0	1	1	1	1
Q13200	Q13200	17	17	17	26S proteasome non-ATPase regulatory subunit 2	PSMD2	26S proteasome non-ATPase regulatory subunit 2	1	17	17	17	5	8	6	2	3	5	9	11	8	4	8	7	6	5	7	7	9	5	7	8	8	9	8	6	10	11	11	11	10	10	12	9	10	8	13	11	2	2
Q13206	Q13206	5	5	5	Probable ATP-dependent RNA helicase DDX10	DDX10	Probable ATP-dependent RNA helicase DDX10	1	5	5	5	0	1	0	0	0	0	1	0	0	0	0	1	2	2	3	4	2	2	1	3	3	3	2	2	0	0	0	0	0	0	0	1	0	0	0	0	1	1
Q13217	Q13217	9	9	9	DnaJ homolog subfamily C member 3	DNAJC3	DnaJ homolog subfamily C member 3	1	9	9	9	0	1	0	0	0	0	0	0	0	0	0	0	0	1	0	2	1	0	0	0	0	0	1	0	5	3	2	2	3	3	1	3	2	4	2	4	4	4
Q13247;Q08170;Q13243	Q13247	7;3;1	7;3;1	7;3;1	Serine/arginine-rich splicing factor 6	SRSF6	Serine/arginine-rich splicing factor 6	3	7	7	7	1	2	2	1	1	1	3	3	2	1	2	1	6	7	6	7	6	7	7	7	5	5	6	7	1	1	1	1	1	1	1	1	1	0	1	1	2	1
Q13263	Q13263	6	6	6	Transcription intermediary factor 1-beta	TRIM28	Transcription intermediary factor 1-beta	1	6	6	6	1	1	1	0	1	0	1	1	1	1	0	1	4	2	4	4	6	5	3	5	5	3	3	3	2	3	2	0	1	1	1	3	1	0	2	1	0	0
Q13277	Q13277	5	5	5	Syntaxin-3	STX3	Syntaxin-3	1	5	5	5	2	2	4	3	3	3	3	4	3	3	2	2	0	1	0	0	0	0	0	0	0	0	0	1	1	1	0	0	1	0	1	0	1	0	0	2	2	2
Q13308	Q13308	24	24	24	Inactive tyrosine-protein kinase 7	PTK7	Inactive tyrosine-protein kinase 7	1	24	24	24	19	19	20	14	18	20	24	23	21	18	17	19	6	6	5	11	12	8	7	5	7	12	7	6	4	5	5	7	5	9	2	4	5	6	3	5	0	0
Q13347	Q13347	6	6	6	Eukaryotic translation initiation factor 3 subunit I	EIF3I	Eukaryotic translation initiation factor 3 subunit I	1	6	6	6	2	3	2	1	2	0	2	3	2	2	4	2	2	2	2	1	3	2	2	2	2	3	1	1	3	4	4	3	4	4	3	4	4	3	2	5	0	1
Q13362;Q14738	Q13362;Q14738	2;2	2;2	2;2	Serine/threonine-protein phosphatase 2A 56 kDa regulatory subunit gamma isoform;Serine/threonine-protein phosphatase 2A 56 kDa regulatory subunit delta isoform	PPP2R5C;PPP2R5D	Serine/threonine-protein phosphatase 2A 56 kDa regulatory subunit gamma isoform;Serine/threonine-protein phosphatase 2A 56 kDa regulatory subunit delta isoform	2	2	2	2	0	0	0	0	0	0	1	1	1	0	1	1	1	1	1	1	1	1	1	0	1	1	1	1	0	0	0	0	0	0	0	0	0	0	0	0	0	0
Q13404	Q13404	6	6	2	Ubiquitin-conjugating enzyme E2 variant 1	UBE2V1	Ubiquitin-conjugating enzyme E2 variant 1	1	6	6	2	4	5	6	5	4	5	6	6	6	4	6	6	1	3	2	3	2	1	1	2	2	3	2	1	1	2	0	2	2	2	1	0	1	0	2	1	2	1
Q13405	Q13405	4	4	4	39S ribosomal protein L49, mitochondrial	MRPL49	39S ribosomal protein L49, mitochondrial	1	4	4	4	0	0	0	0	0	0	0	0	0	0	0	0	1	0	0	0	0	0	0	0	0	0	0	1	0	0	0	0	0	0	0	0	0	0	0	0	4	3
Q13409	Q13409	1	1	1	Cytoplasmic dynein 1 intermediate chain 2	DYNC1I2	Cytoplasmic dynein 1 intermediate chain 2	1	1	1	1	0	0	0	0	0	0	1	1	0	0	0	0	0	0	0	0	0	0	0	0	0	0	0	0	0	0	0	0	0	0	0	0	0	0	0	0	0	0
Q13418	Q13418	15	15	15	Integrin-linked protein kinase	ILK	Integrin-linked protein kinase	1	15	15	15	8	11	10	8	7	10	12	12	12	11	10	11	11	9	10	10	9	9	11	12	9	11	9	11	9	6	9	9	8	7	8	7	8	5	10	11	4	2
Q13423	Q13423	4	4	4	NAD(P) transhydrogenase, mitochondrial	NNT	NAD(P) transhydrogenase, mitochondrial	1	4	4	4	0	0	0	0	0	0	0	0	0	0	1	0	0	0	0	0	0	0	0	0	0	0	0	0	0	0	0	0	0	0	0	0	0	0	0	0	3	2
Q13425	Q13425	1	1	1	Beta-2-syntrophin	SNTB2	Beta-2-syntrophin	1	1	1	1	0	1	1	1	1	0	1	1	1	1	1	1	1	0	1	1	1	1	1	0	1	1	0	1	0	0	0	0	0	0	0	0	0	0	0	0	0	1
Q13427	Q13427	3	3	3	Peptidyl-prolyl cis-trans isomerase G	PPIG	Peptidyl-prolyl cis-trans isomerase G	1	3	3	3	1	2	1	0	0	1	1	2	0	2	1	0	2	1	2	3	2	1	2	1	2	2	1	2	0	0	0	0	0	0	0	0	0	0	0	0	0	0
Q13433	Q13433	5	5	5	Zinc transporter ZIP6	SLC39A6	Zinc transporter ZIP6	1	5	5	5	5	5	5	4	4	5	5	5	5	4	4	4	1	0	0	2	2	3	2	1	2	2	2	0	1	1	2	2	1	2	1	2	2	2	2	2	0	1
Q13442	Q13442	2	2	2	28 kDa heat- and acid-stable phosphoprotein	PDAP1	28 kDa heat- and acid-stable phosphoprotein	1	2	2	2	1	0	1	0	1	1	0	1	1	1	1	1	0	0	0	0	0	0	0	0	0	0	0	0	0	0	0	0	0	0	0	0	0	0	0	0	0	0
Q13443	Q13443	13	13	13	Disintegrin and metalloproteinase domain-containing protein 9	ADAM9	Disintegrin and metalloproteinase domain-containing protein 9	1	13	13	13	8	11	11	7	8	12	11	12	10	13	12	9	5	4	6	7	8	5	7	5	6	8	7	2	8	7	8	7	7	10	8	8	7	8	9	9	5	4
Q13444	Q13444	7	7	7	Disintegrin and metalloproteinase domain-containing protein 15	ADAM15	Disintegrin and metalloproteinase domain-containing protein 15	1	7	7	7	3	3	2	1	2	3	3	3	4	3	2	3	6	4	5	5	5	5	6	5	4	6	6	4	4	5	5	4	4	6	4	4	4	4	3	5	4	4
Q13445	Q13445	5	5	5	Transmembrane emp24 domain-containing protein 1	TMED1	Transmembrane emp24 domain-containing protein 1	1	5	5	5	3	3	3	3	2	3	3	3	3	3	3	2	2	1	2	3	3	2	1	1	2	3	3	1	3	2	1	1	1	3	0	3	1	2	0	0	2	2
Q13451	Q13451	3	3	3	Peptidyl-prolyl cis-trans isomerase FKBP5;Peptidyl-prolyl cis-trans isomerase FKBP5, N-terminally processed	FKBP5	Peptidyl-prolyl cis-trans isomerase FKBP5	1	3	3	3	0	0	0	0	0	0	0	0	1	0	0	0	0	0	0	0	0	0	0	1	0	0	0	0	1	2	1	1	1	2	2	1	2	2	1	1	2	3
Q13464	Q13464	4	4	3	Rho-associated protein kinase 1	ROCK1	Rho-associated protein kinase 1	1	4	4	3	1	1	1	1	1	2	2	2	1	2	1	1	0	0	0	0	0	0	0	0	0	0	0	0	0	0	0	0	0	0	0	0	0	1	0	0	0	0
Q13491	Q13491	2	2	2	Neuronal membrane glycoprotein M6-b	GPM6B	Neuronal membrane glycoprotein M6-b	1	2	2	2	1	1	2	1	1	2	1	2	2	2	2	2	0	1	1	1	1	0	1	0	0	1	1	1	0	0	0	0	0	0	0	0	0	0	0	0	1	1
Q13492;O60641	Q13492	3;1	3;1	3;1	Phosphatidylinositol-binding clathrin assembly protein	PICALM	Phosphatidylinositol-binding clathrin assembly protein	2	3	3	3	0	0	1	1	1	1	1	1	0	1	2	1	0	0	0	0	1	1	0	0	0	1	0	0	1	1	0	0	1	1	0	0	0	0	0	0	0	0
Q13501	Q13501	5	5	5	Sequestosome-1	SQSTM1	Sequestosome-1	1	5	5	5	4	1	2	0	0	1	1	1	2	2	2	3	2	1	2	4	2	2	2	2	4	4	2	2	0	0	0	0	0	0	1	0	0	0	1	1	0	0
Q13509	Q13509	20	7	5	Tubulin beta-3 chain	TUBB3	Tubulin beta-3 chain	1	20	7	5	11	12	12	10	11	10	10	13	11	10	13	11	14	11	13	14	13	12	11	12	11	14	12	10	17	18	15	16	17	16	18	16	17	15	15	17	6	8
Q13510	Q13510	2	2	2	Acid ceramidase;Acid ceramidase subunit alpha;Acid ceramidase subunit beta	ASAH1	Acid ceramidase	1	2	2	2	0	0	0	0	0	0	0	0	0	0	0	0	0	0	0	0	0	0	0	0	0	0	0	1	0	0	0	0	0	0	0	0	0	0	0	0	0	2
Q13526	Q13526	3	3	3	Peptidyl-prolyl cis-trans isomerase NIMA-interacting 1	PIN1	Peptidyl-prolyl cis-trans isomerase NIMA-interacting 1	1	3	3	3	1	2	3	1	0	3	1	3	2	3	3	3	0	0	0	0	0	0	0	0	0	0	0	0	0	0	0	0	0	0	0	0	0	0	0	0	0	1
Q13530	Q13530	6	6	6	Serine incorporator 3	SERINC3	Serine incorporator 3	1	6	6	6	5	5	5	4	4	5	5	5	5	5	5	4	2	3	3	3	3	3	4	2	2	3	3	2	2	4	4	2	3	1	1	2	3	3	3	1	0	0
Q13547	Q13547	1	1	1	Histone deacetylase 1	HDAC1	Histone deacetylase 1	1	1	1	1	0	0	1	0	0	0	1	1	0	0	0	1	1	1	1	1	0	1	0	1	1	1	1	1	0	0	0	0	0	1	0	1	1	0	0	0	0	0
Q13561	Q13561	3	3	3	Dynactin subunit 2	DCTN2	Dynactin subunit 2	1	3	3	3	1	0	1	2	0	1	1	0	2	2	1	2	0	0	0	1	0	0	0	0	0	0	0	0	0	0	0	0	0	0	0	0	0	0	0	0	0	0
Q13576	Q13576	4	3	3	Ras GTPase-activating-like protein IQGAP2	IQGAP2	Ras GTPase-activating-like protein IQGAP2	1	4	3	3	2	1	2	1	1	0	2	1	2	2	1	1	0	0	1	0	0	0	0	0	0	0	0	0	0	0	0	0	1	1	1	1	0	1	1	1	1	0
Q13585	Q13585	3	3	3	Melatonin-related receptor	GPR50	Melatonin-related receptor	1	3	3	3	1	3	2	1	0	2	2	3	3	1	3	3	0	0	0	0	0	0	0	0	0	0	0	0	0	0	0	0	0	0	0	0	0	0	0	0	0	0
Q13586	Q13586	2	2	2	Stromal interaction molecule 1	STIM1	Stromal interaction molecule 1	1	2	2	2	0	0	0	0	0	0	0	0	0	0	0	0	2	1	0	2	0	1	0	0	0	1	0	2	2	1	0	1	2	0	0	2	0	0	0	0	2	2
Q13595	Q13595	2	2	2	Transformer-2 protein homolog alpha	TRA2A	Transformer-2 protein homolog alpha	1	2	2	2	0	1	1	1	1	2	1	2	1	1	1	1	1	1	1	1	2	1	1	1	1	1	1	1	0	0	0	1	0	0	0	0	0	0	0	0	0	0
Q13619;Q13620	Q13619;Q13620	3;2	3;2	3;2	Cullin-4A;Cullin-4B	CUL4A;CUL4B	Cullin-4A;Cullin-4B	2	3	3	3	2	1	1	0	1	2	1	1	1	1	1	2	2	1	1	2	2	2	1	2	1	1	2	2	1	0	1	1	1	0	0	2	0	0	1	1	2	2
Q13636	Q13636	3	1	1	Ras-related protein Rab-31	RAB31	Ras-related protein Rab-31	1	3	1	1	1	2	2	0	1	1	2	1	2	0	2	2	2	2	3	1	1	2	2	1	1	0	2	1	0	0	0	0	0	0	0	0	0	0	0	0	0	0
Q13641	Q13641	7	7	7	Trophoblast glycoprotein	TPBG	Trophoblast glycoprotein	1	7	7	7	5	4	6	5	6	4	5	5	7	5	5	5	5	6	6	7	7	6	7	6	5	7	6	6	6	5	6	6	7	7	5	4	4	6	5	5	4	3
Q13642	Q13642	7	7	7	Four and a half LIM domains protein 1	FHL1	Four and a half LIM domains protein 1	1	7	7	7	7	6	6	6	5	7	6	7	7	7	7	6	1	0	1	1	0	0	0	0	0	0	0	1	0	0	0	0	0	0	0	0	0	0	0	0	0	0
Q13683	Q13683	6	6	6	Integrin alpha-7;Integrin alpha-7 heavy chain;Integrin alpha-7 light chain;Integrin alpha-7 70 kDa form	ITGA7	Integrin alpha-7	1	6	6	6	3	2	4	3	4	4	3	5	4	3	3	4	0	0	0	0	0	0	0	0	0	0	0	0	0	0	0	0	0	0	0	0	0	0	0	0	0	0
Q13724	Q13724	9	9	9	Mannosyl-oligosaccharide glucosidase	MOGS	Mannosyl-oligosaccharide glucosidase	1	9	9	9	1	3	0	0	0	0	3	2	3	1	2	1	3	2	3	4	3	4	2	3	4	4	3	2	4	4	2	2	4	3	4	6	2	5	4	4	3	3
Q13740	Q13740	16	16	16	CD166 antigen	ALCAM	CD166 antigen	1	16	16	16	8	8	13	6	8	9	7	10	13	9	9	10	0	1	3	2	1	1	2	1	1	3	3	0	3	7	8	7	8	5	7	4	5	5	7	9	0	1
Q13751	Q13751	28	28	28	Laminin subunit beta-3	LAMB3	Laminin subunit beta-3	1	28	28	28	0	0	0	0	1	0	0	1	0	2	0	1	1	1	1	2	1	0	1	1	0	1	0	0	15	17	18	19	20	21	19	13	18	15	21	21	5	7
Q13753	Q13753	32	32	32	Laminin subunit gamma-2	LAMC2	Laminin subunit gamma-2	1	32	32	32	1	1	0	0	0	0	0	2	0	2	0	0	1	1	0	1	0	0	1	1	0	0	0	1	26	28	24	28	25	26	26	23	26	25	28	28	12	10
Q13794	Q13794	1	1	1	Phorbol-12-myristate-13-acetate-induced protein 1	PMAIP1	Phorbol-12-myristate-13-acetate-induced protein 1	1	1	1	1	1	1	1	0	0	1	1	1	1	1	1	1	0	0	0	0	0	0	0	0	0	0	0	0	1	0	1	1	0	0	0	1	0	0	0	0	0	0
Q13835	Q13835	5	5	5	Plakophilin-1	PKP1	Plakophilin-1	1	5	5	5	0	0	0	2	1	1	0	0	1	1	0	4	0	0	0	0	0	0	0	0	0	0	0	0	0	0	0	0	0	0	0	0	0	0	0	0	0	0
Q13867	Q13867	3	3	3	Bleomycin hydrolase	BLMH	Bleomycin hydrolase	1	3	3	3	2	1	2	2	2	2	1	1	3	2	2	2	1	1	0	1	1	1	1	0	1	0	1	1	1	0	1	1	1	1	1	0	0	1	1	0	1	1
Q13885	Q13885	24	7	1	Tubulin beta-2A chain	TUBB2A	Tubulin beta-2A chain	1	24	7	1	18	18	18	15	14	16	17	19	15	17	18	17	18	15	16	17	17	14	15	16	14	16	15	16	21	23	21	21	18	21	22	19	21	19	20	22	11	10
Q13907	Q13907	1	1	1	Isopentenyl-diphosphate Delta-isomerase 1	IDI1	Isopentenyl-diphosphate Delta-isomerase 1	1	1	1	1	0	1	0	0	1	1	1	1	1	0	0	1	0	0	0	0	0	0	0	0	0	0	0	0	0	0	0	0	0	0	0	0	0	0	0	0	0	0
Q14019	Q14019	4	4	4	Coactosin-like protein	COTL1	Coactosin-like protein	1	4	4	4	2	3	3	2	3	2	3	3	3	3	2	3	0	1	0	0	0	0	0	0	0	0	0	1	2	1	1	1	2	1	1	1	1	1	2	1	1	0
Q14031	Q14031	4	3	3	Collagen alpha-6(IV) chain	COL4A6	Collagen alpha-6(IV) chain	1	4	3	3	1	2	4	2	2	2	1	1	2	2	1	2	1	1	1	1	1	1	1	1	1	1	1	1	1	1	0	0	2	2	2	0	1	2	2	2	0	0
Q14103;O14979	Q14103	3;1	3;1	3;1	Heterogeneous nuclear ribonucleoprotein D0	HNRNPD	Heterogeneous nuclear ribonucleoprotein D0	2	3	3	3	3	3	2	1	2	0	3	3	1	2	2	2	1	1	0	1	1	0	0	0	0	0	0	1	2	1	2	0	0	1	1	0	2	0	1	2	1	1
Q14108	Q14108	9	9	9	Lysosome membrane protein 2	SCARB2	Lysosome membrane protein 2	1	9	9	9	7	7	6	6	5	6	8	7	6	5	8	6	5	4	5	6	5	6	6	4	4	6	6	5	1	2	3	1	2	1	1	2	1	3	1	2	4	3
Q14112	Q14112	20	19	19	Nidogen-2	NID2	Nidogen-2	1	20	19	19	15	19	19	16	15	17	17	17	14	16	13	15	5	5	5	5	5	5	5	5	5	5	5	6	2	2	2	1	2	1	2	2	2	1	2	2	0	0
Q14117	Q14117	1	1	1	Dihydropyrimidinase	DPYS	Dihydropyrimidinase	1	1	1	1	0	0	0	0	0	0	0	0	0	0	0	0	0	0	0	0	0	0	0	0	0	0	0	0	1	1	1	1	0	0	1	1	1	1	1	1	0	0
Q14118	Q14118	6	6	6	Dystroglycan;Alpha-dystroglycan;Beta-dystroglycan	DAG1	Dystroglycan	1	6	6	6	4	3	5	4	4	4	5	5	4	3	4	4	2	2	2	2	2	1	2	2	1	3	1	2	0	2	0	1	4	3	2	2	0	3	0	0	0	0
Q14126	Q14126	21	21	21	Desmoglein-2	DSG2	Desmoglein-2	1	21	21	21	13	17	18	14	17	18	18	20	17	17	17	15	4	4	4	5	2	3	3	1	3	3	8	3	2	4	4	3	3	2	7	1	3	3	4	3	3	2
Q14134	Q14134	1	1	1	Tripartite motif-containing protein 29	TRIM29	Tripartite motif-containing protein 29	1	1	1	1	0	0	0	0	0	0	0	0	0	0	0	0	0	0	0	0	0	0	0	0	0	0	0	0	0	0	0	0	0	0	0	0	0	0	0	0	0	0
Q14137	Q14137	6	6	6	Ribosome biogenesis protein BOP1	BOP1	Ribosome biogenesis protein BOP1	1	6	6	6	0	2	1	0	0	0	2	1	0	0	1	0	3	2	3	2	3	3	1	2	5	2	2	2	2	2	0	0	0	1	2	1	1	0	0	1	0	0
Q14141	Q14141	5	5	3	Septin-6	SEPT6	Septin-6	1	5	5	3	1	2	1	1	2	1	2	2	2	1	1	2	0	0	0	0	0	0	0	0	1	2	0	0	4	3	4	4	3	5	4	4	5	3	5	4	1	1
Q14152	Q14152	10	10	10	Eukaryotic translation initiation factor 3 subunit A	EIF3A	Eukaryotic translation initiation factor 3 subunit A	1	10	10	10	3	4	3	0	0	0	3	3	2	1	2	0	6	3	5	5	6	6	5	6	3	5	5	4	7	5	8	7	6	8	8	4	6	4	7	7	2	1
Q14156;Q9Y2G0	Q14156	4;1	4;1	4;1	Protein EFR3 homolog A	EFR3A	Protein EFR3 homolog A	2	4	4	4	3	2	2	1	0	1	4	4	3	1	3	2	1	0	0	0	0	0	0	0	0	0	0	0	0	0	0	2	2	1	1	0	1	1	0	1	0	0
Q14160	Q14160	21	21	19	Protein scribble homolog	SCRIB	Protein scribble homolog	1	21	21	19	12	14	13	6	7	8	19	17	15	11	15	11	9	6	5	10	7	7	9	5	4	9	9	7	3	3	2	4	3	5	1	2	0	1	3	4	1	2
Q14165	Q14165	6	6	6	Malectin	MLEC	Malectin	1	6	6	6	2	3	1	3	1	1	2	3	2	0	2	3	4	4	4	5	4	3	3	3	4	4	3	4	3	1	2	2	3	1	2	3	2	3	2	2	5	4
Q14166	Q14166	5	5	5	Tubulin--tyrosine ligase-like protein 12	TTLL12	Tubulin--tyrosine ligase-like protein 12	1	5	5	5	3	4	0	0	0	2	2	3	3	1	2	2	3	2	1	1	2	2	1	2	1	1	2	2	5	3	4	4	5	5	4	3	3	4	3	4	0	0
Q14168	Q14168	11	11	10	MAGUK p55 subfamily member 2	MPP2	MAGUK p55 subfamily member 2	1	11	11	10	4	7	5	3	5	5	6	8	8	6	7	7	0	0	0	0	1	1	1	1	1	2	2	1	0	0	0	0	0	0	0	0	0	0	0	1	0	0
Q14203	Q14203	2	2	2	Dynactin subunit 1	DCTN1	Dynactin subunit 1	1	2	2	2	0	0	0	0	0	0	0	0	0	0	0	0	0	0	0	0	0	0	0	0	0	0	0	0	0	0	0	0	0	0	0	0	0	0	0	0	0	0
Q14204	Q14204	101	101	101	Cytoplasmic dynein 1 heavy chain 1	DYNC1H1	Cytoplasmic dynein 1 heavy chain 1	1	101	101	101	27	48	42	6	9	16	43	52	51	43	41	30	50	41	42	53	56	45	51	59	47	57	51	38	68	75	71	72	61	73	67	68	61	31	68	68	4	9
Q14240	Q14240	8	1	1	Eukaryotic initiation factor 4A-II;Eukaryotic initiation factor 4A-II, N-terminally processed	EIF4A2	Eukaryotic initiation factor 4A-II	1	8	1	1	7	7	7	5	5	6	7	8	8	6	7	8	7	6	6	8	8	6	6	7	5	8	7	5	7	8	8	6	5	5	6	6	8	6	7	7	4	3
Q14247	Q14247	5	5	5	Src substrate cortactin	CTTN	Src substrate cortactin	1	5	5	5	1	1	1	1	0	3	3	4	3	2	2	4	0	0	0	0	0	1	0	0	0	0	0	0	1	1	0	1	0	1	0	0	0	0	0	1	1	1
Q14254	Q14254	16	16	16	Flotillin-2	FLOT2	Flotillin-2	1	16	16	16	3	6	7	5	6	5	9	9	8	8	8	11	8	6	8	9	10	8	7	8	8	10	8	6	4	7	6	5	7	5	4	6	7	8	4	5	4	4
Q14257	Q14257	7	7	7	Reticulocalbin-2	RCN2	Reticulocalbin-2	1	7	7	7	2	1	2	2	1	1	2	4	3	2	3	1	3	1	2	3	1	2	0	0	2	3	2	1	4	4	1	3	6	2	3	4	3	4	3	2	2	4
Q14258	Q14258	3	3	3	E3 ubiquitin/ISG15 ligase TRIM25	TRIM25	E3 ubiquitin/ISG15 ligase TRIM25	1	3	3	3	0	1	0	0	0	0	0	1	0	0	0	0	0	0	0	0	0	0	0	0	1	0	0	0	0	0	1	0	1	0	1	0	1	1	1	1	0	0
Q14324	Q14324	4	3	3	Myosin-binding protein C, fast-type	MYBPC2	Myosin-binding protein C, fast-type	1	4	3	3	0	0	0	0	4	0	0	0	0	0	0	0	0	0	1	0	0	0	1	0	0	0	0	1	0	0	0	0	0	0	0	0	0	0	0	0	0	0
Q14344;Q03113	Q14344	15;1	14;0	14;0	Guanine nucleotide-binding protein subunit alpha-13	GNA13	Guanine nucleotide-binding protein subunit alpha-13	2	15	14	14	9	11	12	8	7	9	11	10	11	9	12	10	9	9	8	9	8	10	6	6	8	10	10	12	1	3	3	3	2	2	2	2	2	3	2	3	4	3
Q14376	Q14376	2	2	2	UDP-glucose 4-epimerase	GALE	UDP-glucose 4-epimerase	1	2	2	2	0	0	0	0	0	0	0	0	0	0	0	0	0	0	0	0	0	0	0	0	0	0	0	0	1	0	0	0	0	0	0	0	1	0	0	0	0	0
Q14393	Q14393	12	12	12	Growth arrest-specific protein 6	GAS6	Growth arrest-specific protein 6	1	12	12	12	1	0	0	1	1	1	0	0	1	1	1	1	1	1	1	0	1	0	0	1	0	1	2	0	4	6	11	8	9	10	10	6	9	5	8	9	1	4
Q14435	Q14435	8	8	8	Polypeptide N-acetylgalactosaminyltransferase 3	GALNT3	Polypeptide N-acetylgalactosaminyltransferase 3	1	8	8	8	0	0	0	0	0	0	0	1	0	1	1	0	5	3	3	7	4	3	3	5	4	4	3	5	3	1	0	0	2	0	1	6	0	5	1	0	3	3
Q14498	Q14498	3	3	3	RNA-binding protein 39	RBM39	RNA-binding protein 39	1	3	3	3	1	1	1	0	0	0	3	3	3	3	2	1	1	1	1	2	2	1	1	1	1	1	2	1	0	0	1	0	0	0	1	1	0	0	1	1	0	0
Q14512	Q14512	3	3	3	Fibroblast growth factor-binding protein 1	FGFBP1	Fibroblast growth factor-binding protein 1	1	3	3	3	0	0	0	0	0	0	0	0	0	0	0	0	0	0	0	0	0	0	0	0	0	0	0	0	2	2	3	2	3	1	2	3	2	1	3	2	2	3
Q14520	Q14520	10	10	10	Hyaluronan-binding protein 2;Hyaluronan-binding protein 2 50 kDa heavy chain;Hyaluronan-binding protein 2 50 kDa heavy chain alternate form;Hyaluronan-binding protein 2 27 kDa light chain;Hyaluronan-binding protein 2 27 kDa light chain alternate form	HABP2	Hyaluronan-binding protein 2	1	10	10	10	3	3	0	1	1	1	2	1	0	1	0	0	4	3	3	3	4	3	3	3	5	3	3	3	5	5	4	5	3	5	5	6	3	4	6	5	1	2
Q14534	Q14534	2	2	2	Squalene monooxygenase	SQLE	Squalene monooxygenase	1	2	2	2	0	0	0	0	0	0	0	0	0	0	0	0	2	2	1	1	2	2	0	0	1	0	1	1	0	0	0	0	0	0	0	0	0	0	0	0	0	0
Q14542	Q14542	2	2	2	Equilibrative nucleoside transporter 2	SLC29A2	Equilibrative nucleoside transporter 2	1	2	2	2	0	1	1	0	0	0	2	2	2	1	2	0	1	0	1	1	1	2	1	1	1	2	1	1	0	0	0	0	1	0	1	0	0	1	0	0	0	0
Q14554	Q14554	4	4	4	Protein disulfide-isomerase A5	PDIA5	Protein disulfide-isomerase A5	1	4	4	4	1	1	0	1	0	1	1	0	0	1	1	0	2	0	0	1	0	0	1	0	0	0	1	0	1	1	2	1	1	1	0	1	0	0	2	1	3	3
Q14573;Q14571	Q14573	11;1	11;1	9;0	Inositol 1,4,5-trisphosphate receptor type 3	ITPR3	Inositol 1,4,5-trisphosphate receptor type 3	2	11	11	9	0	0	0	0	0	0	0	0	0	0	0	0	5	2	1	5	2	3	3	2	2	2	3	3	6	2	3	4	4	4	0	7	2	3	1	3	4	4
Q14574;Q02487	Q14574	3;1	3;1	3;1	Desmocollin-3	DSC3	Desmocollin-3	2	3	3	3	2	2	2	2	2	2	1	2	2	2	1	3	0	0	0	0	0	0	0	0	0	0	0	0	0	0	0	0	0	1	0	1	0	0	0	0	1	1
Q14624	Q14624	5	4	4	Inter-alpha-trypsin inhibitor heavy chain H4;70 kDa inter-alpha-trypsin inhibitor heavy chain H4;35 kDa inter-alpha-trypsin inhibitor heavy chain H4	ITIH4	Inter-alpha-trypsin inhibitor heavy chain H4	1	5	4	4	2	2	1	3	1	2	2	2	2	0	1	0	0	0	0	0	0	1	0	0	0	0	0	0	3	2	2	2	3	3	3	3	3	3	2	2	1	1
Q14642	Q14642	6	6	6	Type I inositol 1,4,5-trisphosphate 5-phosphatase	INPP5A	Inositol polyphosphate-5-phosphatase A	1	6	6	6	2	5	4	3	2	4	5	5	6	3	3	3	0	0	0	0	0	0	0	0	0	0	1	0	0	0	0	0	1	0	0	0	0	0	0	0	0	1
Q14644	Q14644	9	9	9	Ras GTPase-activating protein 3	RASA3	Ras GTPase-activating protein 3	1	9	9	9	5	8	7	5	4	5	8	7	8	7	8	8	2	2	1	4	0	1	1	1	2	3	2	2	1	1	1	1	2	2	2	0	0	1	1	2	0	0
Q14651	Q14651	4	1	1	Plastin-1	PLS1	Plastin-1	1	4	1	1	3	3	3	3	3	3	3	3	3	3	3	3	2	1	0	1	2	1	1	0	1	2	1	1	2	1	2	1	3	2	2	1	1	1	1	0	2	3
Q14677	Q14677	2	2	2	Clathrin interactor 1	CLINT1	Clathrin interactor 1	1	2	2	2	2	1	1	0	1	1	2	2	2	0	1	1	0	0	0	0	0	0	0	0	0	0	0	0	1	1	0	1	1	0	0	0	1	0	1	0	0	0
Q14690	Q14690	3	3	3	Protein RRP5 homolog	PDCD11	Protein RRP5 homolog	1	3	3	3	0	0	0	0	0	0	0	0	0	0	0	0	1	1	1	1	1	1	0	1	3	0	0	1	0	0	0	0	0	0	0	0	0	0	0	0	0	0
Q14692	Q14692	3	3	3	Ribosome biogenesis protein BMS1 homolog	BMS1	Ribosome biogenesis protein BMS1 homolog	1	3	3	3	0	0	0	0	0	0	0	0	0	0	0	0	3	2	2	3	3	1	1	2	3	2	3	2	1	1	0	0	0	1	0	2	0	0	0	0	0	0
Q14696	Q14696	5	5	5	LDLR chaperone MESD	MESDC2	LRP chaperone MESD	1	5	5	5	2	1	2	1	1	2	3	1	1	3	2	1	2	2	3	3	2	2	2	2	2	4	3	2	4	3	3	3	4	3	4	3	3	4	2	2	4	5
Q14697	Q14697	46	46	46	Neutral alpha-glucosidase AB	GANAB	Neutral alpha-glucosidase AB	1	46	46	46	20	26	20	14	11	13	25	28	23	20	19	23	32	26	33	34	34	30	29	29	33	32	30	30	33	34	29	30	27	30	30	32	29	37	30	33	34	32
Q14699	Q14699	6	6	6	Raftlin	RFTN1	Raftlin	1	6	6	6	3	4	2	2	2	2	4	4	5	4	6	2	0	0	0	0	0	0	0	0	0	0	0	0	0	0	0	0	0	0	0	0	0	0	0	0	0	1
Q14728	Q14728	2	2	2	Major facilitator superfamily domain-containing protein 10	MFSD10	Major facilitator superfamily domain-containing protein 10	1	2	2	2	0	0	0	0	0	0	0	0	0	0	0	0	1	1	1	1	1	1	1	1	1	1	1	1	1	1	1	1	1	1	1	2	1	1	1	1	1	1
Q14739	Q14739	3	3	3	Lamin-B receptor	LBR	Delta(14)-sterol reductase LBR	1	3	3	3	3	3	1	0	0	1	3	1	2	2	2	2	1	0	0	1	1	0	1	0	0	0	1	2	2	1	1	2	2	2	1	1	1	3	2	2	3	3
Q14764	Q14764	39	39	39	Major vault protein	MVP	Major vault protein	1	39	39	39	3	1	2	0	0	1	0	1	1	0	0	0	13	11	10	12	18	13	14	11	11	20	11	11	37	37	28	32	36	29	30	36	28	35	30	31	10	14
Q14766	Q14766	6	6	6	Latent-transforming growth factor beta-binding protein 1	LTBP1	Latent-transforming growth factor beta-binding protein 1	1	6	6	6	0	0	0	0	0	0	0	0	0	0	0	0	0	0	0	0	0	0	0	0	0	0	0	0	0	1	1	1	2	0	1	1	2	1	1	2	1	1
Q14802	Q14802	1	1	1	FXYD domain-containing ion transport regulator 3	FXYD3	FXYD domain-containing ion transport regulator 3	1	1	1	1	0	0	0	0	0	0	0	0	0	0	0	0	1	1	1	1	0	1	1	1	0	0	1	1	1	1	1	1	1	1	1	1	1	1	1	1	1	1
Q14974	Q14974	17	17	17	Importin subunit beta-1	KPNB1	Importin subunit beta-1	1	17	17	17	10	15	14	10	9	12	13	14	12	11	13	11	8	6	7	10	11	8	10	9	8	8	9	7	5	7	7	4	6	4	5	3	3	6	6	6	4	5
Q15005	Q15005	8	8	8	Signal peptidase complex subunit 2	SPCS2	Signal peptidase complex subunit 2	1	8	8	8	0	2	1	1	0	2	4	2	2	2	1	1	4	3	3	6	5	5	4	3	4	5	4	5	3	3	3	2	2	2	1	2	1	2	2	1	3	5
Q15006	Q15006	5	5	5	ER membrane protein complex subunit 2	EMC2	ER membrane protein complex subunit 2	1	5	5	5	1	2	0	0	0	1	3	1	2	1	2	1	4	5	4	5	5	4	4	4	4	4	5	5	4	2	0	3	2	2	2	3	1	3	3	2	4	3
Q15008	Q15008	10	10	10	26S proteasome non-ATPase regulatory subunit 6	PSMD6	26S proteasome non-ATPase regulatory subunit 6	1	10	10	10	2	6	5	1	4	4	5	5	6	3	4	5	5	5	6	6	8	3	6	6	5	5	6	4	5	6	8	4	6	4	3	4	4	1	6	4	0	0
Q15012	Q15012	1	1	1	Lysosomal-associated transmembrane protein 4A	LAPTM4A	Lysosomal-associated transmembrane protein 4A	1	1	1	1	1	1	1	1	1	1	1	1	1	1	1	1	1	0	0	1	0	0	0	0	0	0	0	1	0	0	0	0	1	0	0	0	0	0	0	0	0	0
Q15019	Q15019	9	9	9	Septin-2	SEPT2	Septin-2	1	9	9	9	7	5	7	5	6	6	8	7	6	7	7	7	3	3	5	4	7	4	4	3	5	5	3	3	7	7	8	7	8	6	6	7	6	4	6	6	5	4
Q15029	Q15029	18	18	18	116 kDa U5 small nuclear ribonucleoprotein component	EFTUD2	116 kDa U5 small nuclear ribonucleoprotein component	1	18	18	18	6	9	7	3	2	6	11	6	5	7	5	8	12	10	11	14	15	12	8	11	11	10	11	9	6	3	4	5	2	4	5	5	3	0	7	5	1	2
Q15041	Q15041	3	3	3	ADP-ribosylation factor-like protein 6-interacting protein 1	ARL6IP1	ADP-ribosylation factor-like protein 6-interacting protein 1	1	3	3	3	0	0	1	0	0	1	1	0	1	1	1	1	2	2	2	3	3	2	2	2	3	2	2	2	3	2	3	3	3	3	3	2	3	3	3	2	0	1
Q15043	Q15043	4	4	4	Zinc transporter ZIP14	SLC39A14	Metal cation symporter ZIP14	1	4	4	4	1	1	2	1	2	2	2	2	2	2	1	2	1	2	0	1	1	1	0	0	1	1	1	0	1	0	0	0	0	2	1	1	0	1	0	0	1	1
Q15046	Q15046	5	5	5	Lysine--tRNA ligase	KARS	Lysine--tRNA ligase	1	5	5	5	0	1	0	0	0	0	1	1	1	1	0	0	2	2	1	1	1	2	1	2	1	1	2	2	1	3	2	3	2	2	2	4	0	1	2	3	2	2
Q15056	Q15056	2	2	2	Eukaryotic translation initiation factor 4H	EIF4H	Eukaryotic translation initiation factor 4H	1	2	2	2	1	0	2	1	1	1	1	1	2	1	1	2	0	0	0	1	0	0	0	0	0	0	0	0	0	0	0	0	0	0	0	0	0	0	0	0	0	0
Q15058	Q15058	3	3	3	Kinesin-like protein KIF14	KIF14	Kinesin-like protein KIF14	1	3	3	3	1	0	1	0	0	0	1	1	2	1	0	0	1	0	0	0	0	0	0	0	0	0	0	0	0	0	0	0	0	1	0	0	0	0	1	0	2	3
Q15061	Q15061	2	2	2	WD repeat-containing protein 43	WDR43	WD repeat-containing protein 43	1	2	2	2	1	1	1	0	0	0	1	1	1	1	1	1	2	2	2	2	1	1	1	1	1	1	1	2	1	0	1	0	0	0	0	1	1	0	0	1	1	0
Q15063	Q15063	13	1	1	Periostin	POSTN	Periostin	1	13	1	1	10	12	8	7	7	7	12	7	10	9	8	6	11	11	8	8	9	10	10	12	7	11	11	7	1	1	2	1	1	0	0	0	0	0	0	0	0	0
Q15067	Q15067	8	8	8	Peroxisomal acyl-coenzyme A oxidase 1	ACOX1	Peroxisomal acyl-coenzyme A oxidase 1	1	8	8	8	0	0	0	0	0	0	0	0	0	0	0	0	2	1	2	3	2	2	1	0	1	3	1	2	0	0	0	0	0	0	0	0	0	0	0	0	4	3
Q15084	Q15084	19	19	19	Protein disulfide-isomerase A6	PDIA6	Protein disulfide-isomerase A6	1	19	19	19	6	7	7	10	5	7	5	7	6	7	8	6	13	9	8	9	11	11	11	9	10	10	8	11	11	13	11	11	13	13	9	13	10	10	11	12	11	14
Q15118	Q15118	2	2	2	[Pyruvate dehydrogenase (acetyl-transferring)] kinase isozyme 1, mitochondrial	PDK1	[Pyruvate dehydrogenase (acetyl-transferring)] kinase isozyme 1, mitochondrial	1	2	2	2	0	0	0	0	0	0	0	0	0	0	0	0	1	1	1	0	1	1	1	1	1	1	1	1	1	0	1	0	1	0	0	1	1	0	0	0	2	1
Q15125	Q15125	2	2	2	3-beta-hydroxysteroid-Delta(8),Delta(7)-isomerase	EBP	3-beta-hydroxysteroid-Delta(8),Delta(7)-isomerase	1	2	2	2	2	2	2	2	2	2	2	2	2	2	2	1	2	2	2	2	2	2	2	2	2	2	2	2	2	2	2	2	2	2	2	2	2	2	2	2	2	2
Q15126	Q15126	1	1	1	Phosphomevalonate kinase	PMVK	Phosphomevalonate kinase	1	1	1	1	0	1	0	0	0	0	1	1	1	1	0	0	0	0	0	0	1	0	0	0	0	0	0	0	1	1	0	0	0	0	1	0	0	0	0	1	1	1
Q15149	Q15149	52	52	51	Plectin	PLEC	Plectin	1	52	52	51	1	0	2	1	1	2	2	2	2	3	2	3	4	4	4	4	2	5	2	2	5	5	3	3	28	26	27	28	31	31	30	27	31	18	32	32	20	21
Q15165	Q15165	8	8	8	Serum paraoxonase/arylesterase 2	PON2	Serum paraoxonase/arylesterase 2	1	8	8	8	0	0	0	0	0	0	0	0	0	0	0	0	1	1	0	1	1	1	1	0	1	1	0	1	7	4	5	3	6	4	2	3	2	5	3	3	1	1
Q15181	Q15181	5	5	5	Inorganic pyrophosphatase	PPA1	Inorganic pyrophosphatase	1	5	5	5	5	5	4	5	3	4	5	5	5	5	5	4	0	0	0	0	0	1	0	0	0	1	0	1	3	3	4	3	3	3	4	2	4	2	4	3	1	4
Q15185	Q15185	8	8	8	Prostaglandin E synthase 3	PTGES3	Prostaglandin E synthase 3	1	8	8	8	6	6	5	4	4	3	7	6	7	7	7	5	7	7	8	7	7	7	7	7	7	7	7	7	3	3	2	1	2	3	1	2	2	2	2	2	1	3
Q15233	Q15233	4	4	4	Non-POU domain-containing octamer-binding protein	NONO	Non-POU domain-containing octamer-binding protein	1	4	4	4	1	2	2	0	1	1	4	1	2	1	2	2	0	0	0	1	2	1	1	1	0	3	1	0	4	1	4	3	3	4	2	2	2	0	2	3	0	0
Q15262	Q15262	5	5	5	Receptor-type tyrosine-protein phosphatase kappa	PTPRK	Receptor-type tyrosine-protein phosphatase kappa	1	5	5	5	2	2	1	0	0	3	3	4	4	4	3	4	1	0	0	0	1	0	0	0	0	0	1	0	0	0	0	0	1	0	0	0	1	1	1	0	0	0
Q15269	Q15269	3	3	3	Periodic tryptophan protein 2 homolog	PWP2	Periodic tryptophan protein 2 homolog	1	3	3	3	0	0	0	0	0	0	0	2	0	0	0	0	2	2	2	2	2	3	1	3	3	3	3	2	2	1	1	1	1	0	2	1	1	1	3	2	1	0
Q15283	Q15283	3	3	3	Ras GTPase-activating protein 2	RASA2	Ras GTPase-activating protein 2	1	3	3	3	1	0	0	0	0	0	1	1	1	1	1	1	0	0	0	0	0	0	0	0	0	0	0	0	0	0	0	0	0	0	0	0	0	0	0	0	0	1
Q15286	Q15286	11	11	11	Ras-related protein Rab-35	RAB35	Ras-related protein Rab-35	1	11	11	11	10	10	9	7	8	6	10	10	10	10	10	10	5	4	4	4	7	5	4	5	5	5	6	5	3	4	6	6	7	6	7	5	5	4	5	7	4	4
Q15287	Q15287	3	3	3	RNA-binding protein with serine-rich domain 1	RNPS1	RNA-binding protein with serine-rich domain 1	1	3	3	3	0	1	0	0	1	1	1	2	1	2	0	1	1	0	2	1	2	1	2	1	1	2	1	1	1	1	1	0	1	1	0	1	1	1	1	1	1	1
Q15293	Q15293	16	16	16	Reticulocalbin-1	RCN1	Reticulocalbin-1	1	16	16	16	8	7	14	10	12	13	9	13	12	8	9	12	7	8	5	8	6	7	4	7	4	5	6	5	10	7	10	10	13	7	8	12	11	12	8	10	7	6
Q15334	Q15334	2	2	2	Lethal(2) giant larvae protein homolog 1	LLGL1	Lethal(2) giant larvae protein homolog 1	1	2	2	2	0	0	0	0	0	0	1	0	0	0	0	0	1	1	1	1	1	1	1	1	1	1	0	1	0	0	0	0	0	0	0	0	0	0	0	0	0	0
Q15349;Q15418;P51812;Q9UK32	Q15349;Q15418;P51812;Q9UK32	2;1;1;1	2;1;1;1	2;1;1;1	Ribosomal protein S6 kinase alpha-2;Ribosomal protein S6 kinase alpha-1;Ribosomal protein S6 kinase alpha-3;Ribosomal protein S6 kinase alpha-6	RPS6KA2;RPS6KA1;RPS6KA3;RPS6KA6	Ribosomal protein S6 kinase alpha-2;Ribosomal protein S6 kinase alpha-1;Ribosomal protein S6 kinase alpha-3;Ribosomal protein S6 kinase alpha-6	4	2	2	2	0	0	0	0	0	0	0	1	1	0	1	0	1	1	1	1	1	0	1	1	1	1	1	1	2	1	0	0	0	0	0	0	0	0	0	0	1	0
Q15363	Q15363	8	8	8	Transmembrane emp24 domain-containing protein 2	TMED2	Transmembrane emp24 domain-containing protein 2	1	8	8	8	3	6	6	6	6	6	6	6	6	4	6	4	6	5	6	6	7	5	6	6	6	6	5	5	5	6	5	3	5	3	3	6	3	6	3	5	2	2
Q15365;P57721	Q15365	5;2	3;0	3;0	Poly(rC)-binding protein 1	PCBP1	Poly(rC)-binding protein 1	2	5	3	3	3	3	3	3	3	3	4	4	4	3	5	3	3	3	3	3	3	3	4	3	3	3	4	4	3	3	3	3	3	3	2	3	3	3	2	3	3	3
Q15366	Q15366	5	5	3	Poly(rC)-binding protein 2	PCBP2	Poly(rC)-binding protein 2	1	5	5	3	2	4	3	2	2	2	3	4	3	3	4	3	2	2	2	2	2	2	2	2	2	2	2	2	2	3	3	3	2	2	2	2	3	2	2	3	2	2
Q15370	Q15370	3	3	3	Transcription elongation factor B polypeptide 2	TCEB2	Elongin-B	1	3	3	3	1	2	2	1	1	2	3	3	2	3	2	3	1	1	1	1	1	1	1	1	1	1	1	1	0	0	0	0	0	0	0	0	0	0	1	0	0	0
Q15375;Q9UF33	Q15375	7;3	4;1	3;0	Ephrin type-A receptor 7	EPHA7	Ephrin type-A receptor 7	2	7	4	3	4	5	3	2	3	3	5	6	2	3	5	4	1	1	2	2	2	3	1	1	1	3	2	2	1	2	2	2	2	2	2	2	2	2	1	1	1	2
Q15382	Q15382	2	2	2	GTP-binding protein Rheb	RHEB	GTP-binding protein Rheb	1	2	2	2	1	1	1	1	1	1	1	1	2	2	2	1	0	0	0	0	0	0	0	0	0	0	0	0	0	0	0	0	0	0	0	0	0	0	0	0	0	0
Q15392	Q15392	6	6	6	Delta(24)-sterol reductase	DHCR24	Delta(24)-sterol reductase	1	6	6	6	0	0	0	0	0	0	0	0	0	0	0	0	5	3	3	5	5	4	5	4	4	5	5	4	4	2	2	1	1	1	1	4	2	2	5	2	4	3
Q15393	Q15393	5	5	5	Splicing factor 3B subunit 3	SF3B3	Splicing factor 3B subunit 3	1	5	5	5	0	1	0	0	0	0	0	2	0	1	1	0	3	3	4	4	5	3	3	3	2	5	2	2	2	2	2	1	0	1	1	2	2	0	1	1	0	0
Q15397	Q15397	2	2	2	Pumilio domain-containing protein KIAA0020	KIAA0020	Pumilio homolog 3	1	2	2	2	0	0	0	0	0	0	0	0	0	0	0	0	2	0	1	1	1	1	1	1	1	1	1	1	0	0	0	0	1	1	0	0	0	0	0	0	0	0
Q15404	Q15404	9	9	9	Ras suppressor protein 1	RSU1	Ras suppressor protein 1	1	9	9	9	9	8	8	7	7	7	8	8	8	6	9	9	2	2	1	2	3	0	1	2	3	2	1	2	6	5	6	6	5	4	4	3	6	4	4	7	0	1
Q15435	Q15435	3	3	3	Protein phosphatase 1 regulatory subunit 7	PPP1R7	Protein phosphatase 1 regulatory subunit 7	1	3	3	3	1	3	2	2	0	1	1	2	2	1	2	1	1	2	2	2	1	1	1	1	1	1	2	2	0	1	2	2	0	1	2	0	1	2	1	2	0	1
Q15493	Q15493	2	2	2	Regucalcin	RGN	Regucalcin	1	2	2	2	2	2	2	1	1	0	2	2	2	2	2	2	1	0	0	0	1	0	0	0	1	1	1	0	0	0	0	0	0	0	0	0	0	0	0	0	0	0
Q15517	Q15517	3	3	3	Corneodesmosin	CDSN	Corneodesmosin	1	3	3	3	1	0	0	3	0	1	0	0	0	1	0	3	0	0	0	0	0	0	0	0	0	0	0	0	0	0	0	0	0	0	0	0	0	0	0	0	0	0
Q15555	Q15555	3	3	3	Microtubule-associated protein RP/EB family member 2	MAPRE2	Microtubule-associated protein RP/EB family member 2	1	3	3	3	3	2	3	1	2	3	3	3	2	3	3	2	2	2	2	2	2	1	2	2	2	2	2	2	1	2	1	1	1	2	1	2	1	2	1	2	0	0
Q15582	Q15582	15	15	15	Transforming growth factor-beta-induced protein ig-h3	TGFBI	Transforming growth factor-beta-induced protein ig-h3	1	15	15	15	2	2	2	1	2	2	3	3	2	1	4	2	3	5	3	4	5	2	6	3	3	5	5	1	9	12	10	12	12	7	9	8	11	8	7	6	5	3
Q15599	Q15599	6	6	6	Na(+)/H(+) exchange regulatory cofactor NHE-RF2	SLC9A3R2	Na(+)/H(+) exchange regulatory cofactor NHE-RF2	1	6	6	6	5	4	5	4	5	5	4	4	5	6	6	6	1	1	1	2	2	1	1	1	2	2	2	1	0	0	0	0	0	0	0	0	0	2	0	1	1	1
Q15631	Q15631	1	1	1	Translin	TSN	Translin	1	1	1	1	1	1	1	1	1	1	1	1	1	1	1	1	0	0	0	0	0	0	0	0	0	0	0	0	0	0	0	0	0	0	0	0	0	0	0	0	0	0
Q15645	Q15645	1	1	1	Pachytene checkpoint protein 2 homolog	TRIP13	Pachytene checkpoint protein 2 homolog	1	1	1	1	1	1	0	0	0	0	1	1	1	1	1	0	0	0	0	1	0	0	0	1	0	1	0	0	0	0	0	0	0	0	0	0	0	0	0	0	0	0
Q15652	Q15652	3	3	3	Probable JmjC domain-containing histone demethylation protein 2C	JMJD1C	Probable JmjC domain-containing histone demethylation protein 2C	1	3	3	3	0	0	1	0	1	1	0	0	1	0	0	1	1	1	1	1	1	1	1	1	1	1	1	1	2	2	1	1	1	1	1	2	1	2	1	1	1	1
Q15691	Q15691	3	3	3	Microtubule-associated protein RP/EB family member 1	MAPRE1	Microtubule-associated protein RP/EB family member 1	1	3	3	3	1	2	2	2	2	1	1	1	1	1	1	2	1	0	0	1	1	1	1	0	1	0	0	0	0	0	0	0	0	0	0	0	0	0	0	0	0	1
Q15738	Q15738	10	10	10	Sterol-4-alpha-carboxylate 3-dehydrogenase, decarboxylating	NSDHL	Sterol-4-alpha-carboxylate 3-dehydrogenase, decarboxylating	1	10	10	10	2	4	2	0	0	1	5	3	2	4	3	3	5	4	3	6	6	4	2	7	6	5	7	4	5	5	6	4	6	7	4	7	4	9	4	4	3	5
Q15758	Q15758	16	16	16	Neutral amino acid transporter B(0)	SLC1A5	Neutral amino acid transporter B(0)	1	16	16	16	15	16	16	14	16	16	16	16	16	16	15	14	10	10	10	13	12	11	9	10	9	12	10	9	12	11	12	11	12	11	9	10	11	11	13	11	7	6
Q15800	Q15800	4	4	4	Methylsterol monooxygenase 1	MSMO1	Methylsterol monooxygenase 1	1	4	4	4	0	1	0	0	0	0	0	1	0	0	0	0	2	2	3	3	2	3	2	2	2	1	1	0	3	3	3	3	3	3	3	3	3	3	3	3	4	2
Q15819	Q15819	6	2	2	Ubiquitin-conjugating enzyme E2 variant 2	UBE2V2	Ubiquitin-conjugating enzyme E2 variant 2	1	6	2	2	2	4	5	3	4	3	6	6	5	4	6	6	0	2	1	2	2	1	1	1	1	2	1	0	1	2	0	2	1	2	1	1	1	0	2	1	2	1
Q15833	Q15833	9	9	9	Syntaxin-binding protein 2	STXBP2	Syntaxin-binding protein 2	1	9	9	9	5	8	7	5	4	5	9	8	8	9	8	5	5	5	6	5	7	6	6	5	4	6	6	3	1	3	2	2	1	2	2	2	1	1	3	2	0	0
Q15836;P23763	Q15836	5;1	2;0	2;0	Vesicle-associated membrane protein 3	VAMP3	Vesicle-associated membrane protein 3	2	5	2	2	5	5	5	5	5	5	5	5	5	5	5	5	3	2	4	3	3	2	2	1	1	2	2	2	4	4	4	4	4	4	4	4	4	4	3	4	2	1
Q15848	Q15848	1	1	1	Adiponectin	ADIPOQ	Adiponectin	1	1	1	1	0	0	0	0	0	0	0	0	0	0	0	0	0	0	0	0	0	0	0	0	0	0	0	0	1	1	1	1	1	1	1	1	1	1	1	1	0	0
Q15904	Q15904	4	4	4	V-type proton ATPase subunit S1	ATP6AP1	V-type proton ATPase subunit S1	1	4	4	4	0	0	1	0	1	0	0	1	0	0	0	0	2	1	0	2	1	1	1	1	0	1	1	0	1	1	1	1	1	0	0	1	1	1	2	1	0	0
Q15907	Q15907	11	11	2	Ras-related protein Rab-11B	RAB11B	Ras-related protein Rab-11B	1	11	11	2	11	10	11	10	11	10	11	10	10	10	9	10	8	8	8	9	10	7	7	8	7	10	9	8	4	7	4	5	6	4	6	5	4	5	5	6	5	4
Q15942	Q15942	4	4	4	Zyxin	ZYX	Zyxin	1	4	4	4	1	1	1	0	0	0	2	1	2	0	1	1	0	0	1	0	0	0	0	0	0	0	1	1	0	0	0	0	0	0	0	0	0	0	0	0	1	1
Q16181	Q16181	11	11	10	Septin-7	SEPT7	Septin-7	1	11	11	10	5	5	5	5	3	3	4	4	6	4	4	4	2	2	2	2	2	4	2	1	2	1	4	1	6	5	5	6	7	6	5	6	6	3	6	5	3	3
Q16363	Q16363	18	18	18	Laminin subunit alpha-4	LAMA4	Laminin subunit alpha-4	1	18	18	18	11	18	10	6	6	7	12	11	6	3	7	7	0	0	0	0	0	0	0	0	1	0	0	0	1	1	1	1	1	1	1	1	1	1	1	1	0	0
Q16394	Q16394	7	7	7	Exostosin-1	EXT1	Exostosin-1	1	7	7	7	3	4	4	0	3	3	4	3	4	5	5	5	5	5	4	5	6	4	6	6	4	6	6	5	1	0	2	0	1	1	1	1	2	1	2	2	0	1
Q16401	Q16401	4	4	4	26S proteasome non-ATPase regulatory subunit 5	PSMD5	26S proteasome non-ATPase regulatory subunit 5	1	4	4	4	1	1	0	0	0	0	2	2	2	0	2	0	2	1	1	1	3	1	1	2	2	1	0	1	1	1	2	0	1	1	1	1	0	0	1	1	0	0
Q16513	Q16513	13	13	13	Serine/threonine-protein kinase N2	PKN2	Serine/threonine-protein kinase N2	1	13	13	13	6	7	4	1	2	6	9	7	8	7	8	6	1	1	1	1	2	1	1	1	0	1	1	1	0	0	0	0	0	0	0	0	0	0	0	0	1	1
Q16531	Q16531	4	4	4	DNA damage-binding protein 1	DDB1	DNA damage-binding protein 1	1	4	4	4	3	3	3	2	1	3	3	3	3	3	3	2	0	0	0	1	2	0	1	0	1	1	0	1	0	0	0	0	0	0	0	0	0	0	0	0	0	0
Q16543	Q16543	4	4	4	Hsp90 co-chaperone Cdc37;Hsp90 co-chaperone Cdc37, N-terminally processed	CDC37	Hsp90 co-chaperone Cdc37	1	4	4	4	2	3	4	1	1	2	3	3	2	3	2	1	1	0	1	2	1	2	0	1	1	2	0	1	0	0	1	1	2	1	2	0	1	0	1	1	0	0
Q16553	Q16553	1	1	1	Lymphocyte antigen 6E	LY6E	Lymphocyte antigen 6E	1	1	1	1	1	0	0	0	0	0	0	1	1	0	0	1	0	0	0	0	0	0	0	0	0	0	0	0	0	1	0	0	0	1	1	0	1	0	0	0	0	0
Q16555;Q14194	Q16555	5;1	5;1	5;1	Dihydropyrimidinase-related protein 2	DPYSL2	Dihydropyrimidinase-related protein 2	2	5	5	5	0	2	1	1	1	0	2	1	1	0	2	2	1	1	0	1	1	0	2	0	0	2	2	1	1	3	3	2	1	2	2	2	2	1	3	3	3	3
Q16563	Q16563	4	4	4	Synaptophysin-like protein 1	SYPL1	Synaptophysin-like protein 1	1	4	4	4	2	3	3	3	3	2	2	2	3	3	2	3	3	4	3	4	3	3	3	4	3	3	3	3	3	3	3	3	2	2	1	2	1	2	2	1	2	3
Q16610	Q16610	7	7	7	Extracellular matrix protein 1	ECM1	Extracellular matrix protein 1	1	7	7	7	1	0	1	0	1	0	2	1	2	2	1	0	1	2	1	1	0	1	3	2	1	1	2	2	6	5	1	1	3	1	1	3	5	2	2	4	0	1
Q16625	Q16625	9	9	9	Occludin	OCLN	Occludin	1	9	9	9	6	7	6	6	6	7	8	8	9	8	8	7	3	3	4	5	4	4	5	4	3	6	5	5	0	1	1	2	3	3	2	0	0	2	0	1	0	0
Q16629	Q16629	3	3	2	Serine/arginine-rich splicing factor 7	SRSF7	Serine/arginine-rich splicing factor 7	1	3	3	2	1	3	1	1	2	1	3	2	2	1	2	0	2	2	2	2	2	2	1	2	2	2	2	2	0	0	0	0	0	0	0	0	0	0	0	0	0	0
Q16637	Q16637	4	4	4	Survival motor neuron protein	SMN1	Survival motor neuron protein	1	4	4	4	0	3	3	0	1	0	2	1	2	3	1	3	0	1	0	0	0	0	0	0	0	0	1	0	0	0	0	0	0	0	1	0	0	0	0	0	0	0
Q16658	Q16658	18	18	18	Fascin	FSCN1	Fascin	1	18	18	18	9	8	9	6	7	8	10	13	10	11	13	6	0	1	2	0	1	1	0	0	0	1	1	2	13	13	15	14	13	15	14	13	15	11	12	16	6	7
Q16698	Q16698	4	4	4	2,4-dienoyl-CoA reductase, mitochondrial	DECR1	2,4-dienoyl-CoA reductase, mitochondrial	1	4	4	4	0	0	0	0	0	0	0	0	0	0	0	0	0	0	0	0	1	0	0	0	0	0	0	0	0	0	0	0	0	0	0	0	0	1	0	0	3	3
Q16706	Q16706	18	18	18	Alpha-mannosidase 2	MAN2A1	Alpha-mannosidase 2	1	18	18	18	1	0	0	0	0	0	0	0	1	1	0	1	14	9	9	14	14	13	13	12	12	12	12	8	3	1	0	1	1	0	1	3	0	2	1	0	4	4
Q16718	Q16718	4	4	4	NADH dehydrogenase [ubiquinone] 1 alpha subcomplex subunit 5	NDUFA5	NADH dehydrogenase [ubiquinone] 1 alpha subcomplex subunit 5	1	4	4	4	0	0	0	0	0	0	0	0	0	0	0	0	0	0	0	0	0	0	0	0	0	0	0	0	0	0	0	0	0	0	0	0	0	0	0	0	2	2
Q16719	Q16719	1	1	1	Kynureninase	KYNU	Kynureninase	1	1	1	1	0	0	0	0	0	0	0	0	0	0	0	0	0	0	0	0	0	0	0	0	0	0	0	0	0	0	0	0	0	0	0	0	0	0	0	0	1	1
Q16762	Q16762	1	1	1	Thiosulfate sulfurtransferase	TST	Thiosulfate sulfurtransferase	1	1	1	1	0	0	0	0	0	0	0	0	0	0	0	0	0	0	0	0	0	0	0	0	0	0	0	0	0	0	0	0	0	0	0	0	0	0	0	0	1	1
Q16777;Q6FI13	Q16777;Q6FI13	10;10	2;2	2;2	Histone H2A type 2-C;Histone H2A type 2-A	HIST2H2AC;HIST2H2AA3	Histone H2A type 2-C;Histone H2A type 2-A	2	10	2	2	9	9	9	9	9	9	9	9	9	9	9	9	10	9	7	10	9	9	9	9	10	9	10	9	7	8	7	8	7	8	8	6	6	7	7	7	3	4
Q16787	Q16787	40	38	38	Laminin subunit alpha-3	LAMA3	Laminin subunit alpha-3	1	40	38	38	3	4	2	2	1	1	3	1	1	2	0	1	2	2	1	2	1	1	1	3	3	3	3	3	21	23	22	28	24	27	25	24	26	20	23	25	11	13
Q16795	Q16795	3	3	3	NADH dehydrogenase [ubiquinone] 1 alpha subcomplex subunit 9, mitochondrial	NDUFA9	NADH dehydrogenase [ubiquinone] 1 alpha subcomplex subunit 9, mitochondrial	1	3	3	3	0	0	0	0	0	0	0	0	0	0	0	0	1	1	0	0	0	0	0	0	0	0	0	0	0	0	0	0	0	0	0	0	0	0	0	0	2	3
Q16799	Q16799	1	1	1	Reticulon-1	RTN1	Reticulon-1	1	1	1	1	1	1	1	1	1	1	1	1	1	1	1	1	1	1	1	1	1	1	1	1	1	1	1	1	1	1	1	1	1	1	1	1	1	1	1	1	1	1
Q16819	Q16819	3	3	3	Meprin A subunit alpha	MEP1A	Meprin A subunit alpha	1	3	3	3	0	0	0	0	0	0	0	0	0	0	0	0	2	2	2	3	3	2	2	2	2	2	3	3	0	0	0	0	0	0	0	0	0	0	0	0	0	0
Q16822	Q16822	6	6	6	Phosphoenolpyruvate carboxykinase [GTP], mitochondrial	PCK2	Phosphoenolpyruvate carboxykinase [GTP], mitochondrial	1	6	6	6	0	0	0	0	0	0	0	0	0	0	0	0	0	0	0	0	0	0	0	0	0	0	0	0	1	1	1	1	1	1	1	1	1	1	0	1	5	4
Q16836	Q16836	6	6	6	Hydroxyacyl-coenzyme A dehydrogenase, mitochondrial	HADH	Hydroxyacyl-coenzyme A dehydrogenase, mitochondrial	1	6	6	6	0	0	0	0	0	0	0	1	0	0	0	0	0	0	0	0	0	0	0	0	0	0	0	0	0	0	0	1	0	0	1	0	0	0	1	1	4	4
Q16850	Q16850	14	14	14	Lanosterol 14-alpha demethylase	CYP51A1	Lanosterol 14-alpha demethylase	1	14	14	14	0	0	0	0	0	0	2	1	0	1	0	0	6	7	6	8	5	7	6	6	6	7	6	7	7	5	4	6	6	7	3	9	4	9	4	6	7	8
Q16851	Q16851	2	2	2	UTP--glucose-1-phosphate uridylyltransferase	UGP2	UTP--glucose-1-phosphate uridylyltransferase	1	2	2	2	0	1	0	0	0	0	1	1	1	0	0	0	0	0	0	1	1	1	1	0	0	1	1	1	1	1	0	1	0	1	0	1	1	0	1	0	0	0
Q16880	Q16880	5	5	5	2-hydroxyacylsphingosine 1-beta-galactosyltransferase	UGT8	2-hydroxyacylsphingosine 1-beta-galactosyltransferase	1	5	5	5	0	0	0	0	0	0	0	0	0	0	0	0	0	0	0	0	0	0	0	0	0	0	1	0	2	1	1	2	1	1	1	1	1	0	1	1	3	3
Q16881	Q16881	3	3	2	Thioredoxin reductase 1, cytoplasmic	TXNRD1	Thioredoxin reductase 1, cytoplasmic	1	3	3	2	2	1	1	0	1	2	2	2	2	1	2	2	1	1	1	1	1	1	1	1	0	1	1	1	0	0	0	0	1	0	0	0	0	0	0	0	1	1
Q16891	Q16891	8	8	8	MICOS complex subunit MIC60	IMMT	MICOS complex subunit MIC60	1	8	8	8	0	0	0	0	0	0	0	0	0	0	0	0	0	0	0	0	0	0	0	1	0	1	0	0	1	1	1	1	1	1	1	1	1	1	1	1	7	5
Q1KMD3	Q1KMD3	3	3	3	Heterogeneous nuclear ribonucleoprotein U-like protein 2	HNRNPUL2	Heterogeneous nuclear ribonucleoprotein U-like protein 2	1	3	3	3	0	0	0	0	0	0	0	0	0	0	0	0	1	2	1	2	2	1	1	1	2	1	1	1	0	0	0	0	0	0	0	0	0	0	0	0	0	0
Q1L6U9	Q1L6U9	1	1	1	Prostate-associated microseminoprotein	MSMP	Prostate-associated microseminoprotein	1	1	1	1	0	0	0	0	0	0	0	0	0	0	0	0	0	0	0	0	0	0	0	0	0	0	0	0	0	0	0	0	0	0	0	0	0	0	0	0	1	0
Q29RF7	Q29RF7	3	3	3	Sister chromatid cohesion protein PDS5 homolog A	PDS5A	Sister chromatid cohesion protein PDS5 homolog A	1	3	3	3	0	0	0	0	0	0	0	0	0	0	0	0	0	0	1	2	1	1	1	1	2	1	0	0	0	0	0	0	0	0	0	0	0	0	0	0	0	0
Q2M389	Q2M389	2	2	2	WASH complex subunit 7	KIAA1033	WASH complex subunit 4	1	2	2	2	0	0	0	0	0	0	0	0	0	0	0	0	1	1	0	1	1	0	0	0	1	1	1	0	0	0	0	0	0	0	0	0	0	0	0	0	0	0
Q32MZ4;Q9Y608	Q32MZ4;Q9Y608	2;1	2;1	2;1	Leucine-rich repeat flightless-interacting protein 1;Leucine-rich repeat flightless-interacting protein 2	LRRFIP1;LRRFIP2	Leucine-rich repeat flightless-interacting protein 1;Leucine-rich repeat flightless-interacting protein 2	2	2	2	2	0	0	0	1	0	1	1	1	1	0	0	1	0	0	0	0	0	0	0	0	0	0	0	0	0	1	1	0	1	0	0	0	0	0	0	0	0	0
Q32P28	Q32P28	5	5	5	Prolyl 3-hydroxylase 1	LEPRE1	Prolyl 3-hydroxylase 1	1	5	5	5	1	0	2	0	0	0	2	1	1	0	2	1	1	0	1	1	0	0	0	0	0	0	1	1	2	2	1	0	2	2	1	2	1	2	2	2	3	3
Q3SXM5	Q3SXM5	2	2	2	Inactive hydroxysteroid dehydrogenase-like protein 1	HSDL1	Inactive hydroxysteroid dehydrogenase-like protein 1	1	2	2	2	0	0	0	0	0	0	0	0	0	0	0	0	0	0	0	0	0	0	0	0	0	0	0	0	0	0	0	0	0	0	0	0	0	0	0	0	0	0
Q3SY69	Q3SY69	3	3	2	Mitochondrial 10-formyltetrahydrofolate dehydrogenase	ALDH1L2	Mitochondrial 10-formyltetrahydrofolate dehydrogenase	1	3	3	2	0	0	0	0	0	0	0	0	0	0	0	0	0	0	1	0	1	0	0	0	0	0	0	0	0	0	0	0	0	0	0	0	0	0	0	0	1	1
Q3ZCM7	Q3ZCM7	11	2	2	Tubulin beta-8 chain	TUBB8	Tubulin beta-8 chain	1	11	2	2	9	9	10	6	8	7	9	10	7	8	8	9	10	8	8	11	8	8	9	10	7	10	8	8	9	10	9	8	8	10	10	9	8	9	9	9	3	4
Q4G0N4	Q4G0N4	1	1	1	NAD kinase 2, mitochondrial	NADK2	NAD kinase 2, mitochondrial	1	1	1	1	0	1	0	0	0	0	0	0	0	0	0	0	1	0	1	1	1	0	1	1	1	1	1	0	0	0	0	0	0	0	0	0	0	0	0	0	0	0
Q4KMP7	Q4KMP7	3	3	3	TBC1 domain family member 10B	TBC1D10B	TBC1 domain family member 10B	1	3	3	3	1	2	2	1	1	2	2	3	1	1	2	2	1	0	0	0	0	0	0	0	0	1	0	0	0	0	0	0	0	0	0	0	0	0	0	0	0	0
Q4KMQ2	Q4KMQ2	9	9	9	Anoctamin-6	ANO6	Anoctamin-6	1	9	9	9	3	5	3	4	4	5	4	5	4	4	4	7	1	2	0	2	0	2	1	1	2	3	2	1	0	2	0	1	1	0	1	0	0	0	0	0	3	3
Q4VCS5	Q4VCS5	12	12	12	Angiomotin	AMOT	Angiomotin	1	12	12	12	8	10	6	4	4	9	10	10	11	9	10	8	0	0	0	0	0	0	0	0	0	1	0	0	0	0	1	0	0	1	0	0	0	0	0	0	0	0
Q53EZ4	Q53EZ4	22	22	22	Centrosomal protein of 55 kDa	CEP55	Centrosomal protein of 55 kDa	1	22	22	22	22	22	22	17	19	21	21	22	22	21	19	21	8	10	11	11	11	9	11	10	10	10	10	5	1	5	7	6	6	7	5	2	6	4	4	8	0	0
Q9P0S3;Q53FV1	Q9P0S3;Q53FV1	1;1	1;1	1;1	ORM1-like protein 1;ORM1-like protein 2	ORMDL1;ORMDL2	ORM1-like protein 1;ORM1-like protein 2	2	1	1	1	0	0	0	0	0	0	0	0	0	0	0	0	1	1	0	1	1	0	0	0	1	1	1	1	0	1	0	0	0	1	1	1	1	1	1	1	0	0
Q53GQ0	Q53GQ0	5	5	5	Very-long-chain 3-oxoacyl-CoA reductase	HSD17B12	Very-long-chain 3-oxoacyl-CoA reductase	1	5	5	5	2	2	2	0	0	1	2	2	3	2	2	2	2	1	2	2	2	2	0	0	3	1	0	0	5	3	3	4	4	4	4	5	3	5	4	2	2	2
Q53H12	Q53H12	4	4	4	Acylglycerol kinase, mitochondrial	AGK	Acylglycerol kinase, mitochondrial	1	4	4	4	0	0	0	0	0	1	0	0	0	0	0	0	0	0	0	0	0	0	0	0	0	0	0	0	0	0	0	0	0	0	0	0	0	0	0	0	2	1
Q53S08;Q9H0N0	Q53S08;Q9H0N0	2;2	2;2	2;2	Ras-related protein Rab-6C	RAB6C	Ras-related protein Rab-6D;Ras-related protein Rab-6C	2	2	2	2	1	1	1	1	1	0	1	1	1	0	1	1	0	0	0	1	1	0	0	0	1	0	0	0	0	0	0	0	0	0	0	0	0	0	0	0	0	0
Q562R1	Q562R1	5	1	1	Beta-actin-like protein 2	ACTBL2	Beta-actin-like protein 2	1	5	1	1	3	3	4	3	3	3	3	4	3	4	3	3	3	3	4	3	4	3	4	3	3	4	3	3	3	3	3	3	3	3	3	3	3	3	4	3	3	3
Q56VL3	Q56VL3	1	1	1	OCIA domain-containing protein 2	OCIAD2	OCIA domain-containing protein 2	1	1	1	1	0	0	0	0	0	0	0	0	0	0	0	0	0	0	0	0	0	0	0	0	0	0	0	0	0	0	0	0	0	0	0	0	0	0	0	0	1	1
Q58EX2	Q58EX2	5	5	5	Protein sidekick-2	SDK2	Protein sidekick-2	1	5	5	5	1	4	4	1	1	2	3	3	3	3	2	2	0	0	0	0	0	0	0	0	0	0	0	0	0	0	0	0	0	0	0	0	0	0	0	0	0	0
Q58FF6	Q58FF6	7	2	2	Putative heat shock protein HSP 90-beta 4	HSP90AB4P	Putative heat shock protein HSP 90-beta 4	1	7	2	2	3	3	4	2	2	3	4	4	4	3	3	3	3	3	3	3	4	3	3	2	2	2	2	2	3	2	2	3	3	2	2	2	3	1	2	2	2	1
Q58FF8	Q58FF8	8	1	1	Putative heat shock protein HSP 90-beta 2	HSP90AB2P	Putative heat shock protein HSP 90-beta 2	1	8	1	1	7	7	6	6	5	6	7	6	6	5	5	4	6	6	5	5	5	4	5	5	5	5	3	3	5	5	4	6	4	3	4	4	5	4	6	4	2	2
Q5BJF2	Q5BJF2	3	3	3	Transmembrane protein 97	TMEM97	Sigma intracellular receptor 2	1	3	3	3	0	0	0	0	0	0	0	0	0	0	0	0	2	2	2	2	2	2	2	2	1	2	2	2	0	0	0	0	0	0	0	0	0	0	0	0	2	2
Q5BJH7	Q5BJH7	1	1	1	Protein YIF1B	YIF1B	Protein YIF1B	1	1	1	1	0	0	0	0	1	0	0	0	0	0	1	0	0	1	0	0	0	0	0	0	1	0	0	0	1	1	1	1	1	1	1	1	0	1	1	1	0	0
Q5EB52	Q5EB52	1	1	1	Mesoderm-specific transcript homolog protein	MEST	Mesoderm-specific transcript homolog protein	1	1	1	1	0	0	0	0	0	0	0	0	0	0	0	0	1	1	1	1	1	1	0	0	1	1	1	1	0	0	0	0	0	0	0	0	0	0	0	0	1	1
Q5J8M3	Q5J8M3	2	2	2	ER membrane protein complex subunit 4	EMC4	ER membrane protein complex subunit 4	1	2	2	2	0	0	0	0	0	0	0	0	0	0	0	0	0	0	0	0	0	0	0	0	0	0	0	0	0	0	0	0	0	0	0	0	0	0	0	0	1	1
Q5JRA6	Q5JRA6	7	7	7	Melanoma inhibitory activity protein 3	MIA3	Transport and Golgi organization protein 1 homolog	1	7	7	7	0	0	0	0	0	0	0	0	0	0	0	0	0	0	0	1	0	0	0	0	1	0	0	0	5	2	1	1	2	1	0	5	2	4	2	0	3	2
Q5JRX3	Q5JRX3	5	5	5	Presequence protease, mitochondrial	PITRM1	Presequence protease, mitochondrial	1	5	5	5	0	0	0	0	0	0	0	0	0	0	0	0	0	0	0	0	0	0	0	0	0	0	0	0	0	0	0	0	0	1	0	0	0	0	0	0	3	2
Q5JTH9	Q5JTH9	5	5	5	RRP12-like protein	RRP12	RRP12-like protein	1	5	5	5	0	2	0	0	0	0	0	0	0	0	0	0	4	5	4	5	5	3	4	4	5	4	5	2	3	3	3	3	1	0	2	2	1	0	2	0	0	0
Q5JTJ3	Q5JTJ3	4	4	4	Cytochrome c oxidase assembly factor 6 homolog	COA6	Cytochrome c oxidase assembly factor 6 homolog	1	4	4	4	0	0	0	0	0	0	0	0	0	0	0	0	0	0	0	0	1	0	0	0	0	0	0	0	0	0	0	1	0	0	1	1	0	1	0	0	3	2
Q5JTV8	Q5JTV8	6	6	5	Torsin-1A-interacting protein 1	TOR1AIP1	Torsin-1A-interacting protein 1	1	6	6	5	1	1	1	2	0	0	1	2	2	2	2	1	3	3	3	3	3	4	5	3	3	3	3	3	3	3	2	2	2	2	2	3	2	4	2	2	2	2
Q5K4L6	Q5K4L6	2	2	2	Long-chain fatty acid transport protein 3	SLC27A3	Solute carrier family 27 member 3	1	2	2	2	1	0	0	0	0	0	0	0	1	0	0	0	2	1	1	2	1	1	1	2	2	2	1	2	1	0	0	0	0	0	0	0	0	0	0	0	0	0
Q5SSJ5	Q5SSJ5	2	2	2	Heterochromatin protein 1-binding protein 3	HP1BP3	Heterochromatin protein 1-binding protein 3	1	2	2	2	1	1	1	1	1	1	0	0	1	1	1	1	1	0	0	1	1	1	0	1	2	1	1	1	0	0	0	0	0	0	0	0	0	0	0	0	0	0
Q5SY16	Q5SY16	4	4	4	Polynucleotide 5-hydroxyl-kinase NOL9	NOL9	Polynucleotide 5-hydroxyl-kinase NOL9	1	4	4	4	0	2	0	0	0	0	2	0	1	0	2	0	4	4	4	4	4	4	4	4	4	4	4	4	1	1	1	2	1	1	1	2	1	3	2	2	2	2
Q5SZK8	Q5SZK8	36	36	36	FRAS1-related extracellular matrix protein 2	FREM2	FRAS1-related extracellular matrix protein 2	1	36	36	36	1	2	2	0	0	1	1	3	0	2	0	0	26	25	27	33	33	29	29	25	25	33	30	32	0	1	1	3	1	1	2	1	3	2	1	1	1	1
Q5T2T1	Q5T2T1	4	4	4	MAGUK p55 subfamily member 7	MPP7	MAGUK p55 subfamily member 7	1	4	4	4	0	1	0	0	0	0	2	1	1	0	0	0	1	1	1	3	3	1	2	0	0	2	2	1	0	0	0	0	0	0	0	0	0	0	0	0	0	0
Q5T4S7	Q5T4S7	8	8	8	E3 ubiquitin-protein ligase UBR4	UBR4	E3 ubiquitin-protein ligase UBR4	1	8	8	8	0	2	1	0	0	0	2	2	1	2	1	1	1	2	3	3	4	3	2	3	1	1	2	1	4	4	3	4	2	4	6	2	1	1	3	4	0	0
Q5T749	Q5T749	18	18	18	Keratinocyte proline-rich protein	KPRP	Keratinocyte proline-rich protein	1	18	18	18	11	6	3	17	13	10	8	5	4	11	7	14	4	3	0	1	4	0	0	2	3	0	10	9	5	0	0	0	1	2	0	1	0	0	9	1	0	0
Q5T750	Q5T750	3	3	3	Skin-specific protein 32	XP32	Skin-specific protein 32	1	3	3	3	3	2	0	3	1	2	3	0	0	3	2	2	0	0	0	0	0	0	0	0	0	0	1	0	0	0	0	0	0	0	0	0	0	0	2	0	0	0
Q5T7M9	Q5T7M9	1	1	1	Protein FAM69A	FAM69A	Divergent protein kinase domain 1A	1	1	1	1	0	0	0	0	0	0	0	0	0	0	0	0	1	0	0	0	0	0	0	0	0	0	0	0	0	0	0	0	0	0	0	0	0	0	0	0	0	0
Q5T9L3	Q5T9L3	4	4	4	Protein wntless homolog	WLS	Protein wntless homolog	1	4	4	4	3	1	3	1	2	3	2	3	2	2	3	2	0	0	0	0	0	0	0	0	0	0	0	0	0	0	0	0	1	0	0	0	0	1	0	0	1	0
Q5U623	Q5U623	2	2	2	Activating transcription factor 7-interacting protein 2	ATF7IP2	Activating transcription factor 7-interacting protein 2	1	2	2	2	0	0	0	0	0	0	0	0	0	0	0	0	0	0	0	0	0	1	0	0	0	1	1	1	0	0	2	0	0	0	0	0	0	0	1	0	0	0
Q5UCC4	Q5UCC4	2	2	2	ER membrane protein complex subunit 10	EMC10	ER membrane protein complex subunit 10	1	2	2	2	0	0	0	0	0	0	1	1	1	0	0	0	1	0	0	0	0	1	0	0	0	0	0	0	0	1	0	0	1	1	0	1	1	1	0	0	0	1
Q5VST6	Q5VST6	2	2	2	Alpha/beta hydrolase domain-containing protein 17B	ABHD17B	Alpha/beta hydrolase domain-containing protein 17B	1	2	2	2	1	1	1	0	0	0	1	1	1	1	0	1	0	0	0	1	2	0	0	0	0	1	0	0	0	0	0	0	0	0	0	0	0	0	0	0	0	0
Q5VST9	Q5VST9	3	3	3	Obscurin	OBSCN	Obscurin	1	3	3	3	1	1	1	1	1	1	1	1	1	1	1	1	0	0	0	0	0	0	0	0	0	0	1	1	1	1	1	1	1	1	1	1	1	1	1	1	0	1
Q5VUB5	Q5VUB5	5	5	4	Protein FAM171A1	FAM171A1	Protein FAM171A1	1	5	5	4	2	3	4	1	1	2	5	5	5	5	4	5	0	0	0	0	0	0	0	0	0	0	0	0	0	0	0	0	0	0	0	0	0	0	0	0	0	0
Q5VW32	Q5VW32	11	11	11	BRO1 domain-containing protein BROX	BROX	BRO1 domain-containing protein BROX	1	11	11	11	11	10	11	10	10	11	10	11	9	11	11	8	3	5	4	4	4	3	6	5	3	5	4	4	4	7	7	6	7	6	7	6	6	7	8	5	0	2
Q5VW38	Q5VW38	3	3	3	Protein GPR107	GPR107	Protein GPR107	1	3	3	3	0	0	0	0	0	0	0	0	0	0	0	0	1	1	1	2	2	1	1	1	2	2	1	1	1	0	0	1	0	0	1	0	0	0	0	0	0	0
Q5VYK3	Q5VYK3	2	2	2	Proteasome-associated protein ECM29 homolog	ECM29	Proteasome adapter and scaffold protein ECM29	1	2	2	2	1	1	1	0	0	0	1	1	1	1	1	0	2	1	2	2	2	2	2	1	1	1	1	1	2	1	2	2	1	1	0	2	1	1	1	1	0	0
Q5W0Z9	Q5W0Z9	2	2	2	Probable palmitoyltransferase ZDHHC20	ZDHHC20	Palmitoyltransferase ZDHHC20	1	2	2	2	1	1	1	1	1	1	0	1	1	1	1	0	2	2	2	2	2	2	2	2	2	2	2	2	0	1	1	1	0	0	1	0	0	1	1	1	0	0
Q5W111	Q5W111	2	2	2	SPRY domain-containing protein 7	SPRYD7	SPRY domain-containing protein 7	1	2	2	2	0	1	0	0	0	1	0	0	0	1	1	0	2	1	1	2	1	2	2	2	1	2	2	1	1	1	1	1	1	2	2	1	1	2	2	1	0	0
Q5ZPR3	Q5ZPR3	12	12	12	CD276 antigen	CD276	CD276 antigen	1	12	12	12	9	11	11	8	9	11	11	12	12	12	12	12	4	4	5	6	6	4	4	5	5	6	5	5	5	5	6	7	7	6	4	6	4	5	4	6	2	3
Q658P3	Q658P3	5	5	5	Metalloreductase STEAP3	STEAP3	Metalloreductase STEAP3	1	5	5	5	1	2	1	2	0	4	2	3	1	3	2	1	2	2	2	3	3	3	4	3	2	3	2	1	4	5	5	4	4	5	4	3	3	2	4	4	3	3
Q66PJ3	Q66PJ3	2	2	2	ADP-ribosylation factor-like protein 6-interacting protein 4	ARL6IP4	ADP-ribosylation factor-like protein 6-interacting protein 4	1	2	2	2	0	0	0	0	0	0	0	0	0	0	0	0	2	1	2	1	0	1	0	0	1	0	1	2	0	0	0	0	0	0	0	0	0	0	0	0	0	0
Q68CZ6	Q68CZ6	1	1	1	HAUS augmin-like complex subunit 3	HAUS3	HAUS augmin-like complex subunit 3	1	1	1	1	0	0	0	0	0	0	0	0	0	0	0	0	0	0	0	0	0	0	0	0	0	0	0	0	0	0	0	0	0	0	0	0	0	0	0	0	1	0
Q68D85	Q68D85	4	4	4	Natural cytotoxicity triggering receptor 3 ligand 1	NCR3LG1	Natural cytotoxicity triggering receptor 3 ligand 1	1	4	4	4	2	3	3	1	2	2	3	3	3	3	2	3	1	1	1	1	1	1	1	1	1	1	1	1	1	1	1	1	0	1	1	0	0	0	1	1	1	2
Q68D91	Q68D91	3	3	3	Metallo-beta-lactamase domain-containing protein 2	MBLAC2	Metallo-beta-lactamase domain-containing protein 2	1	3	3	3	1	1	0	0	0	1	0	1	1	1	1	0	0	0	0	0	1	0	0	0	0	0	0	0	0	0	0	0	0	0	0	0	0	0	0	0	0	0
Q68DQ2	Q68DQ2	2	2	2	Very large A-kinase anchor protein	CRYBG3	Very large A-kinase anchor protein	1	2	2	2	2	1	2	2	2	2	2	2	1	2	2	2	1	0	0	1	1	1	1	2	1	1	1	0	1	1	1	1	1	1	0	1	1	1	1	1	1	1
Q6DD88	Q6DD88	14	14	14	Atlastin-3	ATL3	Atlastin-3	1	14	14	14	2	4	2	1	0	0	4	3	3	1	3	1	10	8	9	9	12	9	8	9	9	12	11	8	10	10	9	8	9	9	8	11	7	9	8	5	4	4
Q6DKI1	Q6DKI1	2	2	2	60S ribosomal protein L7-like 1	RPL7L1	60S ribosomal protein L7-like 1	1	2	2	2	0	1	0	0	0	0	0	0	0	1	0	0	1	1	1	2	1	1	1	1	2	2	1	1	2	1	1	1	0	0	0	2	1	0	1	0	0	0
Q6I9Y2	Q6I9Y2	1	1	1	THO complex subunit 7 homolog	THOC7	THO complex subunit 7 homolog	1	1	1	1	0	0	0	0	0	0	0	0	0	0	0	0	0	0	0	0	0	0	0	0	0	0	0	0	0	0	1	0	0	0	0	0	0	0	0	0	0	0
Q6IAA8	Q6IAA8	1	1	1	Ragulator complex protein LAMTOR1	LAMTOR1	Ragulator complex protein LAMTOR1	1	1	1	1	0	1	0	1	0	1	1	1	1	1	1	1	0	0	0	1	1	0	0	0	1	0	1	0	0	0	0	0	0	0	0	0	0	0	0	0	0	0
Q6IAN0	Q6IAN0	3	3	3	Dehydrogenase/reductase SDR family member 7B	DHRS7B	Dehydrogenase/reductase SDR family member 7B	1	3	3	3	0	0	0	0	0	0	0	0	0	0	0	0	2	1	1	2	1	0	1	0	1	1	1	1	0	0	0	0	0	0	0	0	0	0	0	0	0	0
Q6ISB3	Q6ISB3	3	3	3	Grainyhead-like protein 2 homolog	GRHL2	Grainyhead-like protein 2 homolog	1	3	3	3	0	0	0	0	0	0	0	0	0	0	0	0	2	2	1	3	2	1	1	1	2	2	1	1	0	0	0	0	0	0	0	0	0	0	0	0	1	1
Q6NUJ1	Q6NUJ1	1	1	1	Proactivator polypeptide-like 1;Saposin A-like;Saposin B-Val-like;Saposin B-like;Saposin C-like;Saposin D-like	PSAPL1	Proactivator polypeptide-like 1	1	1	1	1	0	0	0	0	0	0	0	0	0	0	0	0	0	0	0	0	0	0	0	0	0	0	0	0	0	0	0	0	0	0	0	0	0	0	0	0	0	0
Q6NUK1	Q6NUK1	4	4	4	Calcium-binding mitochondrial carrier protein SCaMC-1	SLC25A24	Calcium-binding mitochondrial carrier protein SCaMC-1	1	4	4	4	0	0	0	0	0	0	0	0	0	0	0	0	1	0	0	0	0	0	0	0	0	0	0	0	0	0	0	0	0	0	0	0	0	0	0	0	1	2
Q6NUM9	Q6NUM9	4	4	4	All-trans-retinol 13,14-reductase	RETSAT	All-trans-retinol 13,14-reductase	1	4	4	4	0	0	0	0	0	0	0	0	0	0	0	0	0	0	0	0	0	0	0	1	1	1	1	0	3	1	1	2	2	1	1	2	0	1	2	1	1	3
Q6P1L8	Q6P1L8	2	2	2	39S ribosomal protein L14, mitochondrial	MRPL14	39S ribosomal protein L14, mitochondrial	1	2	2	2	0	0	0	0	0	0	0	0	0	0	0	0	0	0	0	0	0	0	0	0	0	0	0	0	0	0	0	0	0	0	0	0	0	0	0	0	2	1
Q6P1N0	Q6P1N0	4	4	4	Coiled-coil and C2 domain-containing protein 1A	CC2D1A	Coiled-coil and C2 domain-containing protein 1A	1	4	4	4	2	2	2	1	1	2	2	3	1	3	1	2	0	0	1	0	0	0	1	0	0	0	0	0	1	0	0	0	0	0	0	0	0	0	0	0	0	0
Q6P2E9	Q6P2E9	4	4	4	Enhancer of mRNA-decapping protein 4	EDC4	Enhancer of mRNA-decapping protein 4	1	4	4	4	0	3	3	0	0	2	4	3	3	2	2	2	0	0	0	0	0	0	1	0	0	0	0	0	0	0	0	0	0	0	0	0	0	0	0	0	0	0
Q6P2Q9	Q6P2Q9	43	43	43	Pre-mRNA-processing-splicing factor 8	PRPF8	Pre-mRNA-processing-splicing factor 8	1	43	43	43	7	22	13	0	4	4	19	20	20	10	14	8	34	31	34	36	41	31	33	33	37	34	30	31	12	5	9	11	7	8	7	12	7	4	9	8	0	0
Q6P4Q7;Q9H8M5	Q6P4Q7	6;1	6;1	6;1	Metal transporter CNNM4	CNNM4	Metal transporter CNNM4	2	6	6	6	1	4	1	0	0	1	3	3	4	2	2	1	1	0	1	3	2	1	2	1	1	1	1	1	0	0	0	0	0	0	0	0	0	0	0	0	0	0
Q6P587	Q6P587	4	4	4	Acylpyruvase FAHD1, mitochondrial	FAHD1	Acylpyruvase FAHD1, mitochondrial	1	4	4	4	0	0	0	0	0	0	0	0	0	0	0	0	0	0	0	0	0	0	0	0	0	0	0	0	0	0	0	0	0	0	0	0	0	0	0	0	4	2
Q6P9B6	Q6P9B6	2	2	2	TLD domain-containing protein 1	TLDC1	MTOR-associated protein MEAK7	1	2	2	2	2	1	2	2	1	2	2	2	2	2	2	2	0	0	0	0	0	0	0	0	0	0	0	0	0	0	0	0	0	0	0	0	0	0	1	1	0	0
Q6PCB0	Q6PCB0	10	10	10	von Willebrand factor A domain-containing protein 1	VWA1	von Willebrand factor A domain-containing protein 1	1	10	10	10	1	4	1	2	0	0	2	2	1	1	0	1	7	7	5	8	7	6	5	7	8	7	4	5	0	0	0	0	0	0	0	0	0	0	0	0	0	0
Q6PCB8	Q6PCB8	5	5	5	Embigin	EMB	Embigin	1	5	5	5	4	4	3	3	2	4	4	3	4	3	5	3	0	0	0	0	0	0	0	0	0	0	0	0	0	2	4	2	2	2	1	2	0	4	2	3	3	3
Q6PHR2	Q6PHR2	1	1	1	Serine/threonine-protein kinase ULK3	ULK3	Serine/threonine-protein kinase ULK3	1	1	1	1	1	1	1	1	1	1	1	1	1	1	1	0	0	1	0	1	0	1	1	1	1	1	1	1	0	0	0	0	0	0	0	0	0	0	0	0	0	0
Q6PI48	Q6PI48	5	5	5	Aspartate--tRNA ligase, mitochondrial	DARS2	Aspartate--tRNA ligase, mitochondrial	1	5	5	5	0	0	0	0	0	0	0	0	0	0	0	0	0	0	0	0	0	0	0	0	0	1	0	0	0	0	0	0	0	0	0	0	0	0	0	0	5	2
Q6PIU2	Q6PIU2	4	4	4	Neutral cholesterol ester hydrolase 1	NCEH1	Neutral cholesterol ester hydrolase 1	1	4	4	4	0	1	1	0	0	0	1	1	0	0	0	0	0	0	0	1	0	0	0	0	0	0	0	0	3	0	0	0	1	2	1	3	3	2	1	2	3	2
Q6PL18;Q9ULI0	Q6PL18	10;3	10;3	10;3	ATPase family AAA domain-containing protein 2	ATAD2	ATPase family AAA domain-containing protein 2	2	10	10	10	0	0	0	0	1	0	0	1	0	0	0	0	9	5	6	9	10	7	6	6	8	9	6	4	0	0	0	0	0	1	0	1	1	1	1	0	1	0
Q6QHC5	Q6QHC5	3	3	3	Sphingolipid delta(4)-desaturase/C4-hydroxylase DES2	DEGS2	Sphingolipid delta(4)-desaturase/C4-monooxygenase DES2	1	3	3	3	0	0	0	0	0	0	0	0	0	0	0	1	2	3	3	3	3	2	2	1	3	2	3	1	1	1	0	0	0	0	0	0	0	0	0	0	1	1
Q6RW13	Q6RW13	3	3	3	Type-1 angiotensin II receptor-associated protein	AGTRAP	Type-1 angiotensin II receptor-associated protein	1	3	3	3	3	2	2	1	1	3	2	2	3	1	2	2	0	1	1	1	1	0	1	1	1	1	0	1	2	2	3	3	3	2	1	3	2	2	2	2	0	0
Q6UVK1	Q6UVK1	3	3	3	Chondroitin sulfate proteoglycan 4	CSPG4	Chondroitin sulfate proteoglycan 4	1	3	3	3	2	2	3	0	1	3	2	2	3	3	3	3	0	0	0	0	0	0	0	0	0	0	0	0	0	0	0	0	0	0	0	0	0	0	0	0	0	0
Q6UVY6	Q6UVY6	9	9	9	DBH-like monooxygenase protein 1	MOXD1	DBH-like monooxygenase protein 1	1	9	9	9	8	6	8	3	8	7	7	9	9	8	8	7	1	1	0	1	0	0	1	0	1	0	0	1	0	0	0	0	0	0	0	0	0	0	0	0	0	0
Q6UW68	Q6UW68	3	3	3	Transmembrane protein 205	TMEM205	Transmembrane protein 205	1	3	3	3	1	1	1	1	1	1	1	0	1	1	1	1	1	1	1	2	1	1	1	1	2	1	1	1	2	1	1	1	0	1	0	2	0	2	1	0	0	1
Q6UWI4	Q6UWI4	3	3	3	Protein shisa-2 homolog	SHISA2	Protein shisa-2 homolog	1	3	3	3	3	2	3	3	3	3	3	3	3	3	2	3	0	0	0	0	0	0	0	0	0	0	0	0	0	0	0	0	0	0	0	0	0	0	0	0	0	0
Q6UWP8	Q6UWP8	4	4	4	Suprabasin	SBSN	Suprabasin	1	4	4	4	1	0	0	2	1	0	1	0	1	3	1	2	0	0	0	0	1	1	1	0	0	0	0	0	2	2	2	1	1	1	0	2	0	0	2	0	0	0
Q6UXD5	Q6UXD5	1	1	1	Seizure 6-like protein 2	SEZ6L2	Seizure 6-like protein 2	1	1	1	1	0	0	0	0	0	0	0	0	0	1	1	0	0	1	1	1	1	1	1	1	1	1	0	1	0	0	0	0	0	0	0	0	0	0	0	0	0	0
Q6UXG2	Q6UXG2	7	7	7	UPF0577 protein KIAA1324	KIAA1324	Endosome/lysosome-associated apoptosis and autophagy regulator 1	1	7	7	7	0	0	0	0	0	0	0	0	0	0	0	0	5	5	5	7	6	6	5	6	5	7	7	6	0	0	0	0	0	0	0	1	0	0	0	0	0	0
Q6UXH1	Q6UXH1	3	3	3	Cysteine-rich with EGF-like domain protein 2	CRELD2	Protein disulfide isomerase CRELD2	1	3	3	3	0	0	0	0	0	0	0	0	0	0	0	0	1	1	0	1	1	1	0	0	1	0	0	0	1	0	0	2	2	1	1	1	1	2	2	2	3	1
Q6UXI9	Q6UXI9	5	5	5	Nephronectin	NPNT	Nephronectin	1	5	5	5	0	0	1	0	0	1	1	0	0	0	0	0	4	4	3	4	4	3	3	4	3	5	4	3	0	0	0	0	0	0	0	0	0	0	0	0	0	0
Q6UXN9	Q6UXN9	2	2	2	WD repeat-containing protein 82	WDR82	WD repeat-containing protein 82	1	2	2	2	0	0	0	0	0	0	0	1	0	0	0	0	0	0	0	0	0	0	0	0	0	0	0	0	0	0	0	0	0	0	0	0	0	0	1	0	0	0
Q6Y2X3	Q6Y2X3	1	1	1	DnaJ homolog subfamily C member 14	DNAJC14	DnaJ homolog subfamily C member 14	1	1	1	1	0	0	0	0	0	0	0	0	0	0	0	0	0	0	0	0	0	0	0	0	0	0	0	0	0	0	0	0	0	0	0	0	0	0	0	0	0	0
Q6YHK3	Q6YHK3	32	32	32	CD109 antigen	CD109	CD109 antigen	1	32	32	32	7	5	9	7	5	5	9	11	9	9	8	12	3	2	2	1	1	2	3	1	2	1	1	1	20	25	25	22	24	23	22	19	21	24	22	20	12	13
Q6ZMP0	Q6ZMP0	5	5	5	Thrombospondin type-1 domain-containing protein 4	THSD4	Thrombospondin type-1 domain-containing protein 4	1	5	5	5	1	0	0	1	1	1	0	0	1	1	1	1	3	2	2	4	4	2	1	3	3	3	2	3	0	0	0	1	1	2	0	0	0	0	0	0	1	3
Q6ZNJ1	Q6ZNJ1	3	3	3	Neurobeachin-like protein 2	NBEAL2	Neurobeachin-like protein 2	1	3	3	3	0	1	1	0	0	1	1	1	1	1	1	0	0	1	1	1	1	0	1	1	1	1	1	0	0	0	0	0	0	0	0	0	0	0	1	1	0	0
Q6ZRP7	Q6ZRP7	6	6	6	Sulfhydryl oxidase 2	QSOX2	Sulfhydryl oxidase 2	1	6	6	6	1	2	1	1	2	2	3	3	2	1	2	2	5	4	3	5	3	4	6	5	2	3	4	3	3	3	1	2	2	2	1	3	1	2	2	1	1	2
Q6ZUX7	Q6ZUX7	1	1	1	Lipoma HMGIC fusion partner-like 2 protein	LHFPL2	LHFPL tetraspan subfamily member 2 protein	1	1	1	1	0	0	0	0	0	0	1	0	0	0	0	0	0	0	0	0	0	0	0	0	0	0	0	0	1	1	1	1	1	1	1	1	1	1	1	1	0	0
Q6ZV50	Q6ZV50	1	1	1	DNA-binding protein RFX8	RFX8	DNA-binding protein RFX8	1	1	1	1	0	0	0	0	0	0	0	0	0	0	0	0	0	0	0	0	0	0	0	0	0	0	0	0	0	1	1	1	0	1	1	0	0	0	1	1	0	1
Q6ZXV5	Q6ZXV5	3	3	3	Transmembrane and TPR repeat-containing protein 3	TMTC3	Protein O-mannosyl-transferase TMTC3	1	3	3	3	0	0	0	0	0	0	0	0	0	0	0	0	2	2	2	2	2	2	1	1	1	2	2	1	0	0	0	0	0	0	0	0	0	0	0	0	2	2
Q70UQ0	Q70UQ0	8	8	8	Inhibitor of nuclear factor kappa-B kinase-interacting protein	IKBIP	Inhibitor of nuclear factor kappa-B kinase-interacting protein	1	8	8	8	0	0	0	0	0	0	0	0	0	0	0	0	1	1	1	1	1	1	1	1	0	1	1	1	5	2	2	1	3	2	1	5	2	2	3	1	4	5
Q71DI3	Q71DI3	5	5	2	Histone H3.2	HIST2H3A	Histone H3.2	1	5	5	2	4	4	3	3	4	3	4	3	3	4	3	3	5	4	4	4	3	4	3	3	5	4	5	3	4	3	3	4	3	3	3	3	3	3	3	4	1	1
Q71U36;P0DPH8;P0DPH7;Q6PEY2	Q71U36;P0DPH8;P0DPH7;Q6PEY2	27;19;19;14	3;3;3;3	1;1;1;1	Tubulin alpha-1A chain;Tubulin alpha-3E chain	TUBA1A;TUBA3E	Tubulin alpha-1A chain;Tubulin alpha-3D chain;Tubulin alpha-3C chain;Tubulin alpha-3E chain	4	27	3	1	21	21	19	17	19	18	23	21	20	19	22	21	22	21	20	23	24	20	23	21	19	24	22	21	23	24	22	22	21	21	23	23	23	19	20	22	11	13
Q7KYR7	Q7KYR7	6	6	4	Butyrophilin subfamily 2 member A1	BTN2A1	Butyrophilin subfamily 2 member A1	1	6	6	4	2	4	4	2	2	5	5	5	4	5	4	5	1	0	1	1	1	1	0	0	1	1	0	1	1	1	1	1	1	1	1	1	1	1	1	1	1	1
Q7KZF4	Q7KZF4	9	9	9	Staphylococcal nuclease domain-containing protein 1	SND1	Staphylococcal nuclease domain-containing protein 1	1	9	9	9	1	1	1	0	0	0	3	3	1	0	2	0	3	2	2	3	4	3	4	2	2	3	2	2	5	4	4	5	5	3	4	4	5	0	6	1	0	0
Q7KZI7	Q7KZI7	2	2	2	Serine/threonine-protein kinase MARK2	MARK2	Serine/threonine-protein kinase MARK2	1	2	2	2	1	2	2	1	1	1	1	2	2	2	1	2	0	0	0	0	0	0	0	0	0	0	0	0	0	0	0	0	0	0	0	0	0	0	0	0	0	0
Q7L014	Q7L014	1	1	1	Probable ATP-dependent RNA helicase DDX46	DDX46	Probable ATP-dependent RNA helicase DDX46	1	1	1	1	0	0	0	0	0	0	1	0	0	0	0	0	1	1	1	1	1	1	1	1	1	1	1	1	1	0	1	1	1	1	1	0	0	0	1	1	0	0
Q7L0Y3	Q7L0Y3	1	1	1	Mitochondrial ribonuclease P protein 1	TRMT10C	tRNA methyltransferase 10 homolog C	1	1	1	1	0	0	0	0	0	0	0	0	0	0	0	0	0	0	0	0	0	0	0	0	0	0	0	0	0	0	0	0	0	0	0	0	0	0	0	0	1	0
Q7L2E3	Q7L2E3	4	4	4	Putative ATP-dependent RNA helicase DHX30	DHX30	ATP-dependent RNA helicase DHX30	1	4	4	4	0	0	0	0	0	0	0	1	0	0	0	0	0	0	0	1	0	0	0	0	0	0	0	0	1	0	0	0	0	0	0	1	0	0	0	0	1	0
Q7L2H7	Q7L2H7	2	2	2	Eukaryotic translation initiation factor 3 subunit M	EIF3M	Eukaryotic translation initiation factor 3 subunit M	1	2	2	2	0	0	0	0	0	0	0	0	0	0	0	0	1	0	0	0	0	0	0	1	1	0	1	0	1	0	0	0	1	0	0	0	1	0	1	0	0	0
Q7L576	Q7L576	20	20	10	Cytoplasmic FMR1-interacting protein 1	CYFIP1	Cytoplasmic FMR1-interacting protein 1	1	20	20	10	10	13	12	7	7	11	15	13	12	14	12	11	11	7	7	11	12	8	9	8	11	10	8	6	7	7	11	9	10	10	9	9	9	8	10	7	2	3
Q7L7X3	Q7L7X3	11	11	8	Serine/threonine-protein kinase TAO1	TAOK1	Serine/threonine-protein kinase TAO1	1	11	11	8	6	7	5	2	3	6	7	8	5	7	7	5	0	0	1	0	0	0	1	0	1	1	1	1	1	2	1	0	2	2	1	1	1	0	2	0	2	0
Q9H8S9;Q7L9L4	Q9H8S9;Q7L9L4	5;5	5;5	5;5	MOB kinase activator 1A;MOB kinase activator 1B	MOB1A;MOB1B	MOB kinase activator 1A;MOB kinase activator 1B	2	5	5	5	5	3	4	3	3	4	4	4	4	4	4	4	2	1	2	2	3	2	1	2	2	2	2	2	0	0	0	1	0	2	2	0	0	0	1	0	1	0
Q7LBR1	Q7LBR1	6	6	6	Charged multivesicular body protein 1b	CHMP1B	Charged multivesicular body protein 1b	1	6	6	6	5	4	4	2	6	5	3	6	6	5	4	5	2	2	1	2	2	2	4	4	3	2	3	2	0	1	2	2	2	1	2	0	0	0	0	0	0	1
Q7LGA3	Q7LGA3	6	6	6	Heparan sulfate 2-O-sulfotransferase 1	HS2ST1	Heparan sulfate 2-O-sulfotransferase 1	1	6	6	6	0	1	2	0	0	0	1	1	1	1	1	1	4	3	3	4	4	4	3	2	2	4	3	3	0	0	1	0	0	1	0	0	0	1	0	1	0	0
Q7Z2K6	Q7Z2K6	9	9	9	Endoplasmic reticulum metallopeptidase 1	ERMP1	Endoplasmic reticulum metallopeptidase 1	1	9	9	9	0	0	0	0	0	0	0	3	1	0	0	0	2	2	1	4	2	3	1	3	4	2	1	2	3	2	3	2	3	3	1	3	1	4	3	1	5	3
Q7Z2K8	Q7Z2K8	5	5	5	G protein-regulated inducer of neurite outgrowth 1	GPRIN1	G protein-regulated inducer of neurite outgrowth 1	1	5	5	5	3	3	3	1	4	3	5	3	4	4	3	3	0	0	0	0	0	0	0	0	0	0	1	0	0	0	0	0	0	0	0	0	0	0	0	0	0	0
Q7Z2Q7	Q7Z2Q7	1	1	1	Leucine-rich repeat-containing protein 70	LRRC70	Leucine-rich repeat-containing protein 70	1	1	1	1	0	0	0	0	0	0	0	0	0	0	0	0	0	0	0	0	0	0	0	0	0	0	0	0	1	1	1	1	1	1	1	0	0	1	0	0	1	1
Q7Z2T5	Q7Z2T5	2	2	2	TRMT1-like protein	TRMT1L	TRMT1-like protein	1	2	2	2	0	0	0	0	1	0	0	1	1	1	1	1	1	0	1	1	2	2	1	1	1	1	1	1	1	0	0	0	0	0	0	0	0	0	0	0	0	0
Q7Z2W4	Q7Z2W4	7	7	7	Zinc finger CCCH-type antiviral protein 1	ZC3HAV1	Zinc finger CCCH-type antiviral protein 1	1	7	7	7	4	3	4	0	0	1	3	5	3	3	3	3	0	0	0	0	0	0	0	0	0	0	0	0	0	1	1	0	2	1	1	0	1	1	1	1	1	0
Q7Z2W9	Q7Z2W9	1	1	1	39S ribosomal protein L21, mitochondrial	MRPL21	39S ribosomal protein L21, mitochondrial	1	1	1	1	0	0	0	0	0	0	0	0	0	0	0	0	0	0	0	0	0	0	0	0	0	0	0	0	0	0	0	0	0	0	0	0	0	0	0	0	0	0
Q7Z304	Q7Z304	2	2	2	MAM domain-containing protein 2	MAMDC2	MAM domain-containing protein 2	1	2	2	2	0	0	0	0	0	0	0	0	0	0	0	0	2	2	2	2	2	2	1	1	1	2	0	2	0	0	0	0	1	1	0	0	0	0	0	0	0	0
Q7Z3C6	Q7Z3C6	6	6	6	Autophagy-related protein 9A	ATG9A	Autophagy-related protein 9A	1	6	6	6	1	1	2	0	1	2	1	1	1	1	1	2	4	4	2	3	2	2	2	3	3	3	3	4	6	3	5	3	5	5	6	3	5	4	5	4	1	1
Q7Z406	Q7Z406	8	2	2	Myosin-14	MYH14	Myosin-14	1	8	2	2	4	5	6	4	5	4	6	5	6	5	5	6	7	7	6	7	7	7	6	7	6	7	7	6	7	7	7	7	6	6	7	7	7	5	5	5	6	5
Q7Z4H3	Q7Z4H3	2	2	2	HD domain-containing protein 2	HDDC2	5-deoxynucleotidase HDDC2	1	2	2	2	1	1	2	0	2	2	2	2	2	2	2	2	0	0	0	0	0	0	0	0	0	0	0	0	0	0	0	0	0	0	0	0	0	0	0	0	0	0
Q7Z4W1	Q7Z4W1	3	3	3	L-xylulose reductase	DCXR	L-xylulose reductase	1	3	3	3	1	1	1	2	1	1	1	0	1	1	1	1	1	1	1	1	1	0	1	1	1	1	1	0	0	0	0	0	0	1	0	0	0	0	0	0	0	0
Q7Z5G4;Q2TAP0	Q7Z5G4	5;1	5;1	5;1	Golgin subfamily A member 7	GOLGA7	Golgin subfamily A member 7	2	5	5	5	5	4	5	5	5	5	5	5	5	5	5	5	3	3	4	5	4	5	2	2	2	3	3	4	1	2	2	1	2	1	2	1	1	2	2	2	2	3
Q7Z6Z7	Q7Z6Z7	3	3	3	E3 ubiquitin-protein ligase HUWE1	HUWE1	E3 ubiquitin-protein ligase HUWE1	1	3	3	3	0	1	0	0	0	0	1	1	0	0	0	1	1	0	1	1	0	0	0	0	0	0	0	0	0	0	0	0	0	0	1	0	0	0	0	0	0	0
Q7Z7H5	Q7Z7H5	9	8	8	Transmembrane emp24 domain-containing protein 4	TMED4	Transmembrane emp24 domain-containing protein 4	1	9	8	8	7	6	8	6	6	6	7	7	6	6	6	6	8	8	9	8	8	9	8	9	9	7	9	9	6	4	3	5	4	3	3	5	3	6	5	3	3	3
Q86SF2	Q86SF2	4	4	4	N-acetylgalactosaminyltransferase 7	GALNT7	N-acetylgalactosaminyltransferase 7	1	4	4	4	0	0	0	0	0	0	0	0	0	0	0	0	2	3	2	4	3	2	2	2	2	2	2	2	0	0	0	0	0	0	0	0	0	0	0	0	1	0
Q86T03;Q8N4L2	Q86T03	4;1	4;1	4;1	Type 1 phosphatidylinositol 4,5-bisphosphate 4-phosphatase	TMEM55B	Type 1 phosphatidylinositol 4,5-bisphosphate 4-phosphatase	2	4	4	4	2	1	4	2	0	3	4	2	1	3	2	1	3	1	4	4	4	3	4	2	2	4	2	3	0	0	0	0	0	1	2	0	0	0	1	1	2	1
Q86TV6	Q86TV6	3	3	3	Tetratricopeptide repeat protein 7B	TTC7B	Tetratricopeptide repeat protein 7B	1	3	3	3	0	1	0	0	0	0	2	3	1	1	2	0	0	1	0	0	0	0	1	0	0	0	0	0	0	0	0	0	0	0	0	0	0	0	0	0	0	0
Q86UE4	Q86UE4	5	5	5	Protein LYRIC	MTDH	Protein LYRIC	1	5	5	5	1	0	2	0	1	2	1	3	2	1	1	2	3	3	2	3	4	3	3	3	2	3	4	3	2	2	0	1	2	1	2	2	1	2	2	2	2	4
Q86UF1	Q86UF1	5	5	5	Tetraspanin-33	TSPAN33	Tetraspanin-33	1	5	5	5	2	3	5	2	2	3	5	5	4	4	3	5	1	0	0	1	0	0	0	0	0	0	0	1	0	0	0	0	0	0	0	0	0	0	0	0	0	0
Q86UX7	Q86UX7	13	13	13	Fermitin family homolog 3	FERMT3	Fermitin family homolog 3	1	13	13	13	9	10	9	7	9	8	9	8	10	8	9	10	9	9	7	9	10	9	7	7	7	9	8	8	8	11	11	9	9	9	10	10	10	8	11	10	1	2
Q86V85	Q86V85	1	1	1	Integral membrane protein GPR180	GPR180	Integral membrane protein GPR180	1	1	1	1	1	1	1	0	0	0	1	1	1	1	1	0	0	0	0	0	0	0	0	0	0	0	0	0	1	0	0	0	0	0	0	1	0	1	0	1	0	0
Q86VE9	Q86VE9	6	6	6	Serine incorporator 5	SERINC5	Serine incorporator 5	1	6	6	6	4	4	6	4	5	5	5	5	5	6	4	5	5	5	5	4	4	5	5	6	6	5	3	4	1	2	2	2	3	2	1	1	3	3	2	2	1	0
Q86VI3	Q86VI3	10	7	7	Ras GTPase-activating-like protein IQGAP3	IQGAP3	Ras GTPase-activating-like protein IQGAP3	1	10	7	7	2	3	1	0	1	3	3	4	2	1	4	2	4	3	3	4	3	3	2	4	3	2	4	2	0	1	1	1	3	1	1	1	2	1	3	2	1	0
Q86VP6	Q86VP6	11	11	11	Cullin-associated NEDD8-dissociated protein 1	CAND1	Cullin-associated NEDD8-dissociated protein 1	1	11	11	11	6	6	6	2	1	4	7	7	6	5	6	5	6	6	4	5	7	6	7	5	6	5	7	5	3	5	5	9	7	8	5	8	7	3	6	7	3	3
Q86W42	Q86W42	2	2	2	THO complex subunit 6 homolog	THOC6	THO complex subunit 6 homolog	1	2	2	2	0	0	0	0	0	0	0	0	0	0	0	0	1	0	1	1	1	2	2	2	2	1	1	0	0	0	0	0	0	0	0	0	0	0	0	0	0	0
Q86WV6	Q86WV6	2	2	2	Stimulator of interferon genes protein	TMEM173	Stimulator of interferon genes protein	1	2	2	2	0	0	0	0	0	0	0	0	0	0	0	0	0	0	0	0	0	0	0	0	0	0	0	0	0	0	0	0	0	0	0	0	1	2	0	0	1	1
Q86X29	Q86X29	15	15	15	Lipolysis-stimulated lipoprotein receptor	LSR	Lipolysis-stimulated lipoprotein receptor	1	15	15	15	12	13	14	14	13	15	14	14	13	13	14	14	11	10	10	10	9	10	10	9	10	10	11	11	9	11	10	10	11	9	9	9	9	11	11	11	5	6
Q86XX4	Q86XX4	2	2	2	Extracellular matrix protein FRAS1	FRAS1	Extracellular matrix protein FRAS1	1	2	2	2	0	0	0	0	0	0	0	0	0	0	0	0	0	0	0	0	0	0	0	0	0	0	0	0	0	1	1	0	0	1	0	0	1	1	0	2	0	0
Q86Y82	Q86Y82	10	10	10	Syntaxin-12	STX12	Syntaxin-12	1	10	10	10	9	10	10	7	10	9	10	9	10	8	8	9	6	6	6	6	6	6	6	6	5	7	7	6	0	0	1	0	1	1	0	1	0	0	0	0	0	1
Q86YQ8;Q9HCH3	Q86YQ8	31;9	31;9	26;4	Copine-8	CPNE8	Copine-8	2	31	31	26	27	30	29	25	25	29	29	30	28	27	27	27	3	2	4	2	1	3	2	1	2	2	2	3	15	21	22	20	24	19	20	9	18	18	20	22	1	4
Q8IV08	Q8IV08	7	7	7	Phospholipase D3	PLD3	5-3 exonuclease PLD3	1	7	7	7	3	4	4	3	2	4	3	5	4	4	4	5	1	2	2	2	1	3	2	1	0	3	1	3	0	0	1	0	0	0	0	0	0	0	1	0	2	1
Q8IVM0	Q8IVM0	4	4	4	Coiled-coil domain-containing protein 50	CCDC50	Coiled-coil domain-containing protein 50	1	4	4	4	3	4	3	4	3	4	3	4	2	3	3	3	0	0	0	0	0	0	0	1	0	0	0	0	0	0	0	0	0	0	0	0	0	0	0	0	0	0
Q8IWA0	Q8IWA0	2	2	2	WD repeat-containing protein 75	WDR75	WD repeat-containing protein 75	1	2	2	2	0	0	0	0	0	0	0	0	0	0	0	0	1	0	0	0	0	0	0	0	1	0	0	0	0	0	0	0	0	0	0	0	0	0	0	0	0	0
Q8IWA5	Q8IWA5	16	16	16	Choline transporter-like protein 2	SLC44A2	Choline transporter-like protein 2	1	16	16	16	12	11	12	11	12	11	13	11	12	10	10	12	11	11	11	11	10	11	12	14	8	13	9	10	8	7	6	5	7	5	5	8	5	7	4	4	0	0
Q8IWT6	Q8IWT6	3	3	3	Volume-regulated anion channel subunit LRRC8A	LRRC8A	Volume-regulated anion channel subunit LRRC8A	1	3	3	3	0	0	0	0	0	0	1	0	1	0	1	0	0	0	0	0	0	0	0	0	0	0	0	0	0	0	0	0	0	0	0	0	0	0	0	0	1	1
Q8IWU5	Q8IWU5	2	2	2	Extracellular sulfatase Sulf-2	SULF2	Extracellular sulfatase Sulf-2	1	2	2	2	0	1	0	0	0	0	0	0	1	0	1	0	0	0	0	1	0	0	1	1	2	0	0	1	0	0	0	0	0	0	0	0	0	0	0	0	0	0
Q8IWX8	Q8IWX8	3	3	3	Calcium homeostasis endoplasmic reticulum protein	CHERP	Calcium homeostasis endoplasmic reticulum protein	1	3	3	3	1	1	1	1	0	0	0	1	0	1	1	1	1	1	2	1	1	0	2	1	2	1	1	2	0	0	0	0	0	0	0	0	0	0	0	0	0	0
Q8IX04	Q8IX04	2	2	2	Ubiquitin-conjugating enzyme E2 variant 3	UEVLD	Ubiquitin-conjugating enzyme E2 variant 3	1	2	2	2	1	1	1	1	1	1	1	1	2	1	1	1	0	0	0	0	0	0	0	0	0	0	0	0	0	0	0	0	0	0	0	0	0	0	0	0	0	0
Q8IXB1	Q8IXB1	9	9	9	DnaJ homolog subfamily C member 10	DNAJC10	DnaJ homolog subfamily C member 10	1	9	9	9	0	0	0	0	0	0	0	0	1	0	0	0	1	0	0	0	0	0	0	0	0	1	0	0	5	2	4	4	4	3	3	3	3	6	3	5	2	2
Q8IXT5	Q8IXT5	5	5	5	RNA-binding protein 12B	RBM12B	RNA-binding protein 12B	1	5	5	5	3	4	3	1	3	3	3	3	2	3	2	3	3	3	3	3	3	3	2	3	3	3	3	3	0	0	0	0	0	0	0	0	0	0	0	0	0	0
Q8IXU6	Q8IXU6	3	3	3	Solute carrier family 35 member F2	SLC35F2	Solute carrier family 35 member F2	1	3	3	3	1	0	3	1	1	2	1	3	2	3	1	2	1	1	1	1	3	1	1	1	1	2	2	3	0	2	2	2	2	1	0	2	1	1	1	1	2	2
Q8IY18	Q8IY18	2	2	2	Structural maintenance of chromosomes protein 5	SMC5	Structural maintenance of chromosomes protein 5	1	2	2	2	1	0	1	0	1	0	0	1	0	1	1	0	1	1	1	1	1	1	1	1	0	0	1	1	1	0	0	1	0	1	1	0	0	1	1	1	0	0
Q8IY81	Q8IY81	2	2	2	pre-rRNA processing protein FTSJ3	FTSJ3	pre-rRNA 2-O-ribose RNA methyltransferase FTSJ3	1	2	2	2	0	0	0	0	0	0	0	0	0	0	0	0	2	1	2	2	1	2	2	2	2	2	2	1	0	0	0	0	0	0	0	0	0	0	0	0	0	0
Q8IY95	Q8IY95	2	2	2	Transmembrane protein 192	TMEM192	Transmembrane protein 192	1	2	2	2	0	1	0	1	1	2	1	2	2	1	2	0	0	0	1	1	0	0	0	0	0	1	0	0	0	0	0	0	0	0	0	0	0	0	0	0	0	0
Q8IYI8	Q8IYI8	1	1	1	Zinc finger protein 440	ZNF440	Zinc finger protein 440	1	1	1	1	0	0	0	0	0	0	0	0	0	0	0	0	0	0	0	0	0	0	0	0	0	0	0	0	0	0	0	0	0	0	0	0	0	0	0	0	0	0
Q8IYS2	Q8IYS2	3	3	3	Uncharacterized protein KIAA2013	KIAA2013	Uncharacterized protein KIAA2013	1	3	3	3	1	1	0	0	0	0	0	1	1	0	0	0	3	2	2	3	3	3	2	3	3	3	2	1	1	0	1	0	1	1	0	1	1	1	1	1	0	0
Q8IYT4	Q8IYT4	1	1	1	Katanin p60 ATPase-containing subunit A-like 2	KATNAL2	Katanin p60 ATPase-containing subunit A-like 2	1	1	1	1	0	1	1	0	0	0	1	0	1	1	1	0	1	1	1	1	1	1	1	1	1	1	1	1	1	1	1	1	1	1	1	1	1	1	1	1	1	1
Q8IZ83	Q8IZ83	15	15	15	Aldehyde dehydrogenase family 16 member A1	ALDH16A1	Aldehyde dehydrogenase family 16 member A1	1	15	15	15	1	3	1	0	0	1	2	2	2	2	1	1	1	0	0	1	1	0	2	1	1	1	1	1	9	10	11	10	11	11	8	12	10	11	10	7	0	0
Q8IZL8	Q8IZL8	23	23	23	Proline-, glutamic acid- and leucine-rich protein 1	PELP1	Proline-, glutamic acid- and leucine-rich protein 1	1	23	23	23	10	15	10	2	2	5	14	13	8	10	13	9	17	14	14	15	16	14	15	16	16	13	16	13	14	11	14	10	14	10	8	14	12	13	10	11	0	1
Q8IZP0	Q8IZP0	7	7	5	Abl interactor 1	ABI1	Abl interactor 1	1	7	7	5	5	7	4	2	5	5	7	6	6	7	7	6	1	0	0	1	0	0	1	1	0	0	1	1	0	2	0	1	1	2	1	1	1	1	2	2	0	0
Q8N0U8	Q8N0U8	3	3	3	Vitamin K epoxide reductase complex subunit 1-like protein 1	VKORC1L1	Vitamin K epoxide reductase complex subunit 1-like protein 1	1	3	3	3	1	2	1	1	0	2	2	1	1	1	2	2	2	2	2	2	2	2	2	2	2	2	2	2	2	2	1	1	1	2	2	2	1	3	1	3	2	2
Q8N0X7	Q8N0X7	2	2	2	Spartin	SPG20	Spartin	1	2	2	2	2	2	1	1	1	2	1	1	2	1	2	2	0	0	0	0	0	0	0	0	0	0	0	0	0	0	0	1	0	0	0	0	0	0	0	0	0	0
Q8N0Y7	Q8N0Y7	5	1	1	Probable phosphoglycerate mutase 4	PGAM4	Probable phosphoglycerate mutase 4	1	5	1	1	5	4	3	5	3	2	4	4	3	4	4	3	3	3	3	3	5	3	4	4	2	4	3	3	3	3	3	3	4	2	3	4	3	3	3	3	2	2
Q8N114	Q8N114	1	1	1	Protein shisa-5	SHISA5	Protein shisa-5	1	1	1	1	0	0	0	0	0	0	0	0	0	0	0	0	1	1	0	1	1	1	1	0	1	1	1	1	0	0	0	0	0	0	0	0	0	0	0	0	0	0
Q8N118	Q8N118	3	3	3	Cytochrome P450 4X1	CYP4X1	Cytochrome P450 4X1	1	3	3	3	1	0	0	0	0	1	1	0	1	1	1	0	2	1	2	2	0	1	1	1	1	1	2	1	1	1	1	1	1	1	1	1	1	1	1	1	1	2
Q8N163	Q8N163	6	6	6	Cell cycle and apoptosis regulator protein 2	CCAR2	Cell cycle and apoptosis regulator protein 2	1	6	6	6	0	0	0	0	0	0	0	0	0	0	1	0	1	0	1	0	1	1	0	1	0	1	1	1	3	3	5	2	2	4	2	3	2	1	3	0	0	0
Q8N183	Q8N183	2	2	2	Mimitin, mitochondrial	NDUFAF2	NADH dehydrogenase [ubiquinone] 1 alpha subcomplex assembly factor 2	1	2	2	2	0	0	0	0	0	0	0	0	0	0	0	0	0	0	0	0	0	0	0	0	0	0	0	0	0	0	0	0	0	0	0	0	0	0	0	0	2	2
Q8N1F7	Q8N1F7	1	1	1	Nuclear pore complex protein Nup93	NUP93	Nuclear pore complex protein Nup93	1	1	1	1	0	0	0	0	0	0	0	0	0	0	0	0	0	0	0	0	0	0	0	0	0	0	0	0	0	0	0	0	0	0	1	0	0	0	0	0	0	0
Q8N201	Q8N201	1	1	1	Integrator complex subunit 1	INTS1	Integrator complex subunit 1	1	1	1	1	0	0	0	0	0	0	0	0	0	0	0	0	1	1	1	1	1	0	1	1	1	1	1	1	1	1	1	1	0	0	0	0	1	0	0	0	0	0
Q8N257;A0A2R8Y619	Q8N257	11;3	1;1	1;1	Histone H2B type 3-B	HIST3H2BB	Histone H2B type 3-B	2	11	1	1	10	11	10	10	9	9	9	9	8	8	8	7	8	7	8	9	7	9	8	8	10	7	9	9	8	8	8	8	8	8	9	8	8	9	10	9	3	4
Q8N271	Q8N271	5	5	5	Prominin-2	PROM2	Prominin-2	1	5	5	5	0	0	0	0	0	0	0	0	0	0	0	0	4	4	4	3	4	4	4	4	3	4	3	2	0	0	0	0	0	0	0	0	0	0	0	0	0	0
Q8N2K0	Q8N2K0	2	2	2	Monoacylglycerol lipase ABHD12	ABHD12	Lysophosphatidylserine lipase ABHD12	1	2	2	2	0	0	0	0	0	0	0	0	0	0	0	0	2	2	2	2	2	2	1	0	1	2	2	2	0	0	0	0	0	0	0	1	0	0	0	0	0	0
Q8N357	Q8N357	2	2	2	Solute carrier family 35 member F6	SLC35F6	Solute carrier family 35 member F6	1	2	2	2	1	1	1	1	1	1	1	1	1	1	1	2	1	1	1	1	2	1	1	1	1	2	2	1	0	0	0	0	0	0	0	0	0	0	0	0	1	1
Q8N3C0	Q8N3C0	1	1	1	Activating signal cointegrator 1 complex subunit 3	ASCC3	Activating signal cointegrator 1 complex subunit 3	1	1	1	1	0	0	0	0	0	0	0	1	0	0	0	0	1	0	0	0	0	0	1	0	0	1	0	0	1	1	0	1	0	1	1	1	1	0	1	1	0	0
Q8N3E9	Q8N3E9	2	2	2	1-phosphatidylinositol 4,5-bisphosphate phosphodiesterase delta-3	PLCD3	1-phosphatidylinositol 4,5-bisphosphate phosphodiesterase delta-3	1	2	2	2	0	1	0	0	0	0	2	2	2	2	1	1	1	0	0	0	0	0	0	0	0	0	0	0	0	0	0	0	0	0	0	0	0	0	0	0	0	0
Q8N3R9	Q8N3R9	4	4	4	MAGUK p55 subfamily member 5	MPP5	MAGUK p55 subfamily member 5	1	4	4	4	0	0	0	0	0	0	1	0	0	1	0	1	0	0	0	0	0	1	0	0	0	0	0	0	2	0	1	0	0	0	1	1	0	0	0	0	2	2
Q8N427	Q8N427	1	1	1	Thioredoxin domain-containing protein 3	NME8	Thioredoxin domain-containing protein 3	1	1	1	1	0	0	0	0	0	0	0	0	0	0	0	0	1	0	1	1	1	0	1	1	0	1	1	1	0	0	0	0	0	0	0	0	0	0	0	0	1	1
Q8N442	Q8N442	1	1	1	Translation factor GUF1, mitochondrial	GUF1	Translation factor GUF1, mitochondrial	1	1	1	1	0	0	0	0	0	0	0	0	0	0	0	0	0	0	0	0	0	0	0	0	0	0	0	0	0	0	0	0	0	0	0	0	0	0	0	0	0	0
Q8N488	Q8N488	1	1	1	RING1 and YY1-binding protein	RYBP	RING1 and YY1-binding protein	1	1	1	1	0	0	0	0	0	0	1	1	0	0	0	0	1	0	1	1	1	0	1	1	1	1	0	1	0	0	0	0	0	0	0	0	0	0	0	0	0	0
Q8N4C8	Q8N4C8	17	7	7	Misshapen-like kinase 1	MINK1	Misshapen-like kinase 1	1	17	7	7	11	15	14	6	7	11	13	14	14	15	11	14	7	6	4	8	6	4	6	6	4	6	4	3	2	3	5	4	4	4	5	2	4	5	4	5	1	2
Q8N4T4	Q8N4T4	2	2	2	Rho guanine nucleotide exchange factor 39	ARHGEF39	Rho guanine nucleotide exchange factor 39	1	2	2	2	2	2	2	0	0	2	2	2	2	1	1	2	0	0	1	0	2	0	1	0	2	0	0	0	0	0	0	0	0	0	0	0	0	0	0	0	0	0
Q8N5I2	Q8N5I2	14	14	14	Arrestin domain-containing protein 1	ARRDC1	Arrestin domain-containing protein 1	1	14	14	14	12	14	14	11	10	14	13	14	12	14	14	12	8	7	8	11	12	9	10	9	11	11	9	9	10	11	14	10	12	11	11	11	13	13	13	11	1	4
Q8N5K1	Q8N5K1	4	4	4	CDGSH iron-sulfur domain-containing protein 2	CISD2	CDGSH iron-sulfur domain-containing protein 2	1	4	4	4	3	4	2	4	1	2	2	2	2	3	4	4	4	4	4	4	4	4	4	4	3	4	4	4	1	2	0	0	1	1	2	2	1	1	0	2	3	3
Q8N5M9	Q8N5M9	1	1	1	Protein jagunal homolog 1	JAGN1	Protein jagunal homolog 1	1	1	1	1	1	1	0	1	1	0	1	0	0	0	0	0	1	0	1	1	1	1	1	0	0	1	1	0	0	0	0	0	0	0	0	0	0	0	0	0	0	0
Q8N766	Q8N766	15	15	15	ER membrane protein complex subunit 1	EMC1	ER membrane protein complex subunit 1	1	15	15	15	2	4	1	1	1	3	5	5	3	4	2	5	8	7	6	9	11	6	6	7	5	8	3	7	7	6	4	5	4	7	4	7	6	7	5	5	5	5
Q8N895	Q8N895	1	1	1	Zinc finger protein 366	ZNF366	Zinc finger protein 366	1	1	1	1	0	0	0	0	0	0	0	0	0	0	0	0	1	1	1	1	1	1	1	1	1	1	1	1	0	0	0	0	0	0	0	0	0	0	0	0	1	1
Q8N8E3	Q8N8E3	1	1	1	Centrosomal protein of 112 kDa	CEP112	Centrosomal protein of 112 kDa	1	1	1	1	0	0	0	0	0	0	0	0	0	0	0	0	0	0	0	0	0	0	0	0	0	0	0	0	0	0	0	0	0	0	0	0	0	0	0	0	0	0
Q8N8S7;Q9UI08	Q8N8S7	8;1	8;1	8;1	Protein enabled homolog	ENAH	Protein enabled homolog	2	8	8	8	4	5	4	4	5	6	7	6	5	7	7	6	0	1	1	1	0	1	0	1	1	1	1	1	0	0	0	0	1	0	1	0	0	1	0	1	1	0
Q8N8Y2	Q8N8Y2	1	1	1	V-type proton ATPase subunit d 2	ATP6V0D2	V-type proton ATPase subunit d 2	1	1	1	1	1	1	1	0	1	0	1	1	1	1	1	1	0	0	0	0	0	0	0	0	0	0	0	0	0	0	0	0	0	0	0	0	0	0	0	0	0	0
Q8N9C0	Q8N9C0	1	1	1	Immunoglobulin superfamily member 22	IGSF22	Immunoglobulin superfamily member 22	1	1	1	1	0	1	1	1	1	1	1	0	1	1	1	1	1	0	1	1	1	1	1	1	1	1	1	1	0	1	0	0	1	0	0	0	0	0	0	0	1	0
Q8N9N7	Q8N9N7	6	6	6	Leucine-rich repeat-containing protein 57	LRRC57	Leucine-rich repeat-containing protein 57	1	6	6	6	4	6	5	5	4	3	5	6	4	4	4	4	0	0	0	0	0	0	1	1	0	1	0	0	1	1	1	1	1	2	1	1	1	1	1	1	1	0
Q8NB49	Q8NB49	8	8	8	Phospholipid-transporting ATPase IG	ATP11C	Phospholipid-transporting ATPase IG	1	8	8	8	3	5	3	1	0	2	5	6	4	5	5	4	0	1	0	0	1	1	1	0	0	1	1	1	0	0	1	0	0	1	0	0	0	0	0	0	1	2
Q8NBA8	Q8NBA8	1	1	1	DTW domain-containing protein 2	DTWD2	tRNA-uridine aminocarboxypropyltransferase 2	1	1	1	1	0	0	0	0	0	0	0	0	0	0	0	0	1	1	1	1	1	1	1	1	0	1	1	1	0	0	0	0	0	0	0	0	0	0	0	0	0	0
Q8NBI5	Q8NBI5	5	5	5	Solute carrier family 43 member 3	SLC43A3	Solute carrier family 43 member 3	1	5	5	5	1	0	0	0	0	0	0	0	0	0	0	0	1	1	1	1	1	1	1	1	1	1	1	1	3	5	4	5	3	4	5	3	4	3	4	4	1	2
Q8NBI6	Q8NBI6	3	3	3	Xyloside xylosyltransferase 1	XXYLT1	Xyloside xylosyltransferase 1	1	3	3	3	0	0	0	0	0	0	0	0	0	0	0	0	2	2	2	2	2	2	2	2	0	2	2	1	0	0	0	0	0	0	0	0	0	0	0	0	1	1
Q8NBJ4	Q8NBJ4	10	10	10	Golgi membrane protein 1	GOLM1	Golgi membrane protein 1	1	10	10	10	5	3	4	1	3	4	4	4	2	4	5	4	4	2	5	4	4	5	3	3	1	3	4	4	6	8	8	7	7	6	3	5	4	6	3	3	1	2
Q8NBJ5	Q8NBJ5	11	11	11	Procollagen galactosyltransferase 1	COLGALT1	Procollagen galactosyltransferase 1	1	11	11	11	0	2	0	0	0	0	0	0	0	2	1	0	2	0	1	1	1	2	0	0	1	0	0	0	5	4	4	4	3	5	4	4	3	6	6	3	7	4
Q8NBJ7	Q8NBJ7	4	4	4	Sulfatase-modifying factor 2	SUMF2	Inactive C-alpha-formylglycine-generating enzyme 2	1	4	4	4	1	1	1	1	1	1	1	1	0	1	1	1	2	2	2	2	2	2	2	2	0	2	2	2	3	1	3	3	2	2	2	2	2	2	2	2	2	3
Q8NBL1	Q8NBL1	3	3	3	Protein O-glucosyltransferase 1	POGLUT1	Protein O-glucosyltransferase 1	1	3	3	3	0	0	0	0	0	0	1	0	0	0	0	0	0	0	0	1	0	0	0	0	1	1	0	0	1	0	0	1	1	1	0	1	0	0	0	0	3	3
Q8NBM8	Q8NBM8	1	1	1	Prenylcysteine oxidase-like	PCYOX1L	Prenylcysteine oxidase-like	1	1	1	1	0	1	1	0	0	1	1	1	1	1	1	1	0	1	1	1	1	1	0	1	1	1	0	1	0	0	0	0	0	0	0	0	0	1	1	0	1	0
Q8NBN3	Q8NBN3	4	4	4	Transmembrane protein 87A	TMEM87A	Transmembrane protein 87A	1	4	4	4	1	1	2	1	2	1	3	3	2	2	1	3	2	2	3	3	3	2	3	3	1	3	3	2	1	2	1	1	2	1	1	1	1	3	1	1	0	0
Q8NBS9	Q8NBS9	15	15	15	Thioredoxin domain-containing protein 5	TXNDC5	Thioredoxin domain-containing protein 5	1	15	15	15	5	5	6	7	7	7	5	5	6	4	4	5	9	9	5	11	10	8	7	7	9	8	9	8	9	8	8	8	9	7	7	9	5	9	6	6	12	11
Q8NBZ7	Q8NBZ7	5	5	5	UDP-glucuronic acid decarboxylase 1	UXS1	UDP-glucuronic acid decarboxylase 1	1	5	5	5	1	1	2	0	0	1	2	1	1	2	2	0	0	0	0	0	1	0	0	0	0	0	0	0	1	3	4	5	4	2	5	1	3	0	4	4	0	0
Q8NC42	Q8NC42	4	4	4	E3 ubiquitin-protein ligase RNF149	RNF149	E3 ubiquitin-protein ligase RNF149	1	4	4	4	0	2	1	0	0	1	0	2	1	0	0	1	1	2	2	2	3	2	2	0	1	2	2	2	0	0	0	0	0	1	2	0	0	0	1	1	0	0
Q8NC51	Q8NC51	1	1	1	Plasminogen activator inhibitor 1 RNA-binding protein	SERBP1	Plasminogen activator inhibitor 1 RNA-binding protein	1	1	1	1	1	1	1	1	1	1	1	1	1	1	1	0	0	0	0	0	0	0	0	0	0	0	0	0	0	0	0	0	0	0	0	0	0	0	0	0	0	0
Q8NC54	Q8NC54	3	3	3	Keratinocyte-associated transmembrane protein 2	KCT2	Keratinocyte-associated transmembrane protein 2	1	3	3	3	1	1	3	1	2	2	3	2	2	2	2	2	1	0	0	3	3	1	3	2	0	1	1	2	0	0	0	0	1	1	0	0	0	1	0	0	0	0
Q8NC56	Q8NC56	3	3	3	LEM domain-containing protein 2	LEMD2	LEM domain-containing protein 2	1	3	3	3	0	1	0	0	0	0	2	1	0	1	1	0	1	2	1	1	1	3	0	0	1	1	1	1	0	0	0	1	0	1	0	0	0	0	0	0	0	0
Q8NCG7	Q8NCG7	7	7	7	Sn1-specific diacylglycerol lipase beta	DAGLB	Diacylglycerol lipase-beta	1	7	7	7	0	3	2	0	0	2	4	4	2	2	3	3	0	2	1	3	4	2	0	3	1	4	2	2	3	3	2	3	3	4	3	2	3	1	2	1	0	0
Q8NCS7	Q8NCS7	2	2	2	Choline transporter-like protein 5	SLC44A5	Choline transporter-like protein 5	1	2	2	2	1	0	1	0	0	0	1	1	2	1	1	1	0	0	0	0	0	0	0	0	0	0	0	0	0	0	0	0	0	0	0	0	0	0	0	0	0	0
Q8NCW5	Q8NCW5	4	4	4	NAD(P)H-hydrate epimerase	APOA1BP	NAD(P)H-hydrate epimerase	1	4	4	4	3	3	2	1	2	2	3	2	3	3	2	3	1	1	1	1	1	2	1	1	2	0	1	1	0	0	0	0	0	0	0	0	0	0	0	0	1	3
Q8NDC0	Q8NDC0	1	1	1	MAPK-interacting and spindle-stabilizing protein-like	MAPK1IP1L	MAPK-interacting and spindle-stabilizing protein-like	1	1	1	1	1	1	1	1	1	1	1	1	1	1	0	1	0	0	0	1	1	1	1	1	1	1	1	1	0	1	1	1	1	1	1	1	1	1	1	1	0	0
Q8NE01	Q8NE01	2	2	2	Metal transporter CNNM3	CNNM3	Metal transporter CNNM3	1	2	2	2	1	2	2	0	0	1	1	2	0	1	2	1	1	1	1	0	1	1	0	0	0	0	0	0	0	0	0	0	0	0	0	0	0	0	0	0	0	0
Q8NE71	Q8NE71	5	5	5	ATP-binding cassette sub-family F member 1	ABCF1	ATP-binding cassette sub-family F member 1	1	5	5	5	1	1	1	0	1	1	2	2	1	1	2	1	5	4	4	5	4	3	3	4	3	5	5	3	0	0	2	0	0	1	1	0	0	1	1	0	0	0
Q8NEM2	Q8NEM2	2	2	2	SHC SH2 domain-binding protein 1	SHCBP1	SHC SH2 domain-binding protein 1	1	2	2	2	0	0	0	0	0	0	1	1	1	1	0	0	0	0	0	0	0	0	0	0	0	0	0	0	0	0	0	0	0	0	0	0	0	0	0	0	0	0
Q8NEW0	Q8NEW0	3	3	3	Zinc transporter 7	SLC30A7	Zinc transporter 7	1	3	3	3	1	1	0	0	0	1	1	1	0	0	1	0	2	2	2	3	3	3	3	3	2	2	1	2	3	1	2	1	1	2	1	2	0	1	1	1	1	0
Q8NEZ4	Q8NEZ4	3	3	3	Histone-lysine N-methyltransferase 2C	KMT2C	Histone-lysine N-methyltransferase 2C	1	3	3	3	0	0	0	0	0	0	0	0	0	0	0	0	0	0	0	1	0	0	1	0	0	0	1	0	0	0	0	0	0	0	0	0	0	0	0	0	1	1
Q8NF37	Q8NF37	5	5	5	Lysophosphatidylcholine acyltransferase 1	LPCAT1	Lysophosphatidylcholine acyltransferase 1	1	5	5	5	0	0	0	0	0	0	1	1	0	1	0	0	4	3	5	5	5	4	5	5	5	5	4	4	0	0	0	0	0	0	0	1	0	0	0	1	4	5
Q8NFJ5	Q8NFJ5	6	6	6	Retinoic acid-induced protein 3	GPRC5A	Retinoic acid-induced protein 3	1	6	6	6	2	2	2	1	2	1	2	2	1	2	2	2	0	0	0	0	0	0	0	0	0	1	0	0	6	6	6	6	5	6	6	5	6	6	5	5	2	3
Q8NFQ8	Q8NFQ8	3	2	2	Torsin-1A-interacting protein 2	TOR1AIP2	Torsin-1A-interacting protein 2	1	3	2	2	0	1	0	0	0	0	1	1	1	0	0	1	2	2	1	1	1	2	1	1	1	2	2	1	3	2	2	1	2	2	2	3	2	3	2	3	1	1
Q8NG11	Q8NG11	10	10	10	Tetraspanin-14	TSPAN14	Tetraspanin-14	1	10	10	10	8	8	9	7	7	9	7	8	9	9	6	6	8	7	7	7	7	9	7	8	5	8	6	8	5	7	5	5	9	7	5	5	6	7	5	6	3	4
Q8NHG7	Q8NHG7	2	2	2	Small VCP/p97-interacting protein	SVIP	Small VCP/p97-interacting protein	1	2	2	2	2	1	2	1	2	2	2	2	2	2	2	2	0	0	0	0	0	0	0	1	0	0	0	0	0	0	0	0	0	0	0	0	0	0	0	0	0	0
Q8NHH9	Q8NHH9	5	5	5	Atlastin-2	ATL2	Atlastin-2	1	5	5	5	0	2	0	0	0	0	2	1	0	0	1	0	3	2	2	2	4	2	3	3	3	2	2	1	2	2	0	0	0	1	1	0	0	1	1	2	1	1
Q8NHP8	Q8NHP8	6	6	6	Putative phospholipase B-like 2;Putative phospholipase B-like 2 32 kDa form;Putative phospholipase B-like 2 45 kDa form	PLBD2	Putative phospholipase B-like 2	1	6	6	6	0	0	0	0	0	0	0	0	0	0	0	1	0	0	0	2	0	1	0	1	0	2	1	0	0	0	0	0	0	0	0	0	0	1	0	0	2	1
Q8NI22	Q8NI22	2	2	2	Multiple coagulation factor deficiency protein 2	MCFD2	Multiple coagulation factor deficiency protein 2	1	2	2	2	0	1	0	1	2	1	0	1	0	0	0	1	0	1	1	0	1	1	0	0	0	1	0	1	2	1	2	1	1	1	1	2	1	2	1	2	1	1
Q8NI27	Q8NI27	5	5	5	THO complex subunit 2	THOC2	THO complex subunit 2	1	5	5	5	1	2	1	0	0	1	2	3	3	2	1	1	2	3	3	3	4	4	4	2	1	4	2	2	1	1	0	1	1	1	1	1	1	1	1	0	0	0
Q8NI36	Q8NI36	5	5	5	WD repeat-containing protein 36	WDR36	WD repeat-containing protein 36	1	5	5	5	1	3	0	0	0	1	3	0	0	0	2	1	3	4	2	4	2	4	5	3	4	4	3	4	1	0	0	0	0	0	0	2	0	1	1	0	0	0
Q8NI99	Q8NI99	2	2	2	Angiopoietin-related protein 6	ANGPTL6	Angiopoietin-related protein 6	1	2	2	2	0	0	0	0	0	0	0	0	0	0	0	0	1	0	2	1	2	1	1	1	1	2	0	0	0	0	0	0	0	0	0	0	0	0	0	0	0	0
Q8TAA9	Q8TAA9	7	7	7	Vang-like protein 1	VANGL1	Vang-like protein 1	1	7	7	7	2	2	2	2	1	2	3	3	2	3	3	2	4	2	3	3	4	1	2	3	3	2	3	2	1	2	1	1	1	1	1	1	1	1	1	1	1	2
Q8TAD4	Q8TAD4	2	2	2	Zinc transporter 5	SLC30A5	Zinc transporter 5	1	2	2	2	0	0	0	0	0	0	0	0	0	0	0	0	2	2	2	2	1	1	1	1	2	1	1	1	0	0	0	0	0	0	0	0	0	0	0	0	0	0
Q8TAF3	Q8TAF3	2	2	2	WD repeat-containing protein 48	WDR48	WD repeat-containing protein 48	1	2	2	2	2	2	2	0	0	1	2	2	2	2	2	2	0	0	0	0	0	0	0	0	0	0	0	0	0	0	0	0	0	0	0	0	0	0	0	0	0	0
Q8TB61	Q8TB61	5	5	5	Adenosine 3-phospho 5-phosphosulfate transporter 1	SLC35B2	Adenosine 3-phospho 5-phosphosulfate transporter 1	1	5	5	5	0	1	2	0	0	0	1	1	0	1	0	0	4	4	3	5	5	5	3	3	4	4	5	3	0	2	0	0	0	0	1	1	1	1	0	0	0	0
Q8TB73	Q8TB73	13	13	13	Protein NDNF	NDNF	Protein NDNF	1	13	13	13	8	13	7	5	5	4	11	9	7	8	5	5	0	0	0	0	0	0	0	0	0	0	1	0	0	0	0	0	0	0	0	0	0	0	0	0	0	0
Q8TBA6	Q8TBA6	3	3	3	Golgin subfamily A member 5	GOLGA5	Golgin subfamily A member 5	1	3	3	3	0	1	0	0	0	0	1	1	1	1	1	1	1	2	1	1	1	1	2	1	0	1	1	2	1	1	1	1	1	1	1	1	1	1	1	1	0	0
Q8TBM8	Q8TBM8	1	1	1	DnaJ homolog subfamily B member 14	DNAJB14	DnaJ homolog subfamily B member 14	1	1	1	1	0	0	0	0	0	0	0	0	0	0	0	0	0	0	0	0	0	0	1	0	1	0	0	0	0	0	0	0	0	0	0	0	0	0	0	0	0	0
Q8TBQ9	Q8TBQ9	1	1	1	Protein kish-A	TMEM167A	Protein kish-A	1	1	1	1	1	1	1	1	1	1	1	1	1	1	1	1	1	1	1	1	1	1	1	1	1	1	1	1	1	1	1	1	1	1	1	1	1	1	1	1	1	1
Q8TBX8	Q8TBX8	4	4	4	Phosphatidylinositol 5-phosphate 4-kinase type-2 gamma	PIP4K2C	Phosphatidylinositol 5-phosphate 4-kinase type-2 gamma	1	4	4	4	0	1	2	1	1	1	4	3	1	3	2	2	2	2	1	1	2	2	2	1	2	1	2	0	1	0	0	0	0	0	0	1	0	0	0	0	0	0
Q8TC12	Q8TC12	7	7	7	Retinol dehydrogenase 11	RDH11	Retinol dehydrogenase 11	1	7	7	7	2	4	4	1	0	2	3	1	3	3	1	0	5	3	3	6	5	3	4	5	6	3	5	3	4	2	2	3	3	4	1	6	3	5	3	4	2	3
Q8TCJ2	Q8TCJ2	10	10	10	Dolichyl-diphosphooligosaccharide--protein glycosyltransferase subunit STT3B	STT3B	Dolichyl-diphosphooligosaccharide--protein glycosyltransferase subunit STT3B	1	10	10	10	0	4	0	0	0	0	1	2	2	0	0	1	5	4	3	8	8	7	4	6	8	7	8	6	3	2	1	0	3	1	0	4	1	4	1	3	8	7
Q8TCS8	Q8TCS8	2	2	2	Polyribonucleotide nucleotidyltransferase 1, mitochondrial	PNPT1	Polyribonucleotide nucleotidyltransferase 1, mitochondrial	1	2	2	2	1	0	0	0	0	0	1	0	0	1	0	0	0	0	0	0	0	0	0	0	0	0	0	0	0	0	0	0	0	0	0	0	0	0	0	0	1	1
Q8TCT9	Q8TCT9	5	5	5	Minor histocompatibility antigen H13	HM13	Minor histocompatibility antigen H13	1	5	5	5	0	2	1	1	0	2	3	2	2	2	3	3	2	2	2	3	1	2	2	2	1	3	2	2	4	2	2	1	3	1	0	3	1	3	1	3	1	1
Q8TCU6	Q8TCU6	2	2	2	Phosphatidylinositol 3,4,5-trisphosphate-dependent Rac exchanger 1 protein	PREX1	Phosphatidylinositol 3,4,5-trisphosphate-dependent Rac exchanger 1 protein	1	2	2	2	0	0	0	0	0	0	0	0	0	0	0	0	2	2	2	2	2	1	2	1	0	1	0	0	0	0	0	0	0	0	0	0	0	0	0	0	0	0
Q8TCZ2	Q8TCZ2	3	3	3	CD99 antigen-like protein 2	CD99L2	CD99 antigen-like protein 2	1	3	3	3	3	3	3	2	3	3	3	3	3	3	3	3	0	0	0	0	0	0	0	0	0	0	0	0	0	0	0	0	0	1	0	0	0	0	1	1	0	0
Q8TDB8;P11169	Q8TDB8;P11169	3;2	2;1	2;1	Solute carrier family 2, facilitated glucose transporter member 14;Solute carrier family 2, facilitated glucose transporter member 3	SLC2A14;SLC2A3	Solute carrier family 2, facilitated glucose transporter member 14;Solute carrier family 2, facilitated glucose transporter member 3	2	3	2	2	2	2	2	2	2	2	2	2	1	2	2	2	2	2	2	2	3	2	2	2	2	3	2	1	1	1	1	1	1	1	1	1	1	1	1	1	1	1
Q8TDD1	Q8TDD1	2	2	2	ATP-dependent RNA helicase DDX54	DDX54	ATP-dependent RNA helicase DDX54	1	2	2	2	0	0	0	0	0	0	0	0	0	0	0	0	0	0	0	1	0	0	0	0	2	1	1	0	1	0	0	0	0	0	0	0	0	0	1	0	0	0
Q8TDN6	Q8TDN6	4	4	4	Ribosome biogenesis protein BRX1 homolog	BRIX1	Ribosome biogenesis protein BRX1 homolog	1	4	4	4	0	3	0	0	0	0	2	0	0	0	0	0	3	2	2	4	3	3	3	2	3	3	1	3	3	3	2	3	2	2	3	3	0	1	2	2	1	1
Q8TE68	Q8TE68	8	8	8	Epidermal growth factor receptor kinase substrate 8-like protein 1	EPS8L1	Epidermal growth factor receptor kinase substrate 8-like protein 1	1	8	8	8	0	0	0	0	0	0	0	0	0	0	0	0	0	0	0	0	0	0	0	0	0	0	0	0	0	1	1	0	3	3	1	0	3	2	1	2	4	6
Q8TEB1	Q8TEB1	1	1	1	DDB1- and CUL4-associated factor 11	DCAF11	DDB1- and CUL4-associated factor 11	1	1	1	1	0	0	0	0	0	0	0	0	0	0	0	0	0	0	0	0	0	0	0	0	0	0	0	0	0	0	0	1	0	0	0	0	0	0	0	0	0	0
Q8TEM1	Q8TEM1	16	16	16	Nuclear pore membrane glycoprotein 210	NUP210	Nuclear pore membrane glycoprotein 210	1	16	16	16	1	1	0	1	1	0	0	0	1	1	1	1	4	0	2	7	3	3	0	0	5	7	3	4	0	0	0	1	0	0	0	0	0	0	0	0	0	0
Q8TEQ6	Q8TEQ6	4	4	4	Gem-associated protein 5	GEMIN5	Gem-associated protein 5	1	4	4	4	0	1	0	0	0	0	0	0	0	0	0	0	0	1	0	2	1	1	0	2	1	2	1	0	1	1	2	1	0	1	1	0	1	0	0	1	0	0
Q8TEX9	Q8TEX9	1	1	1	Importin-4	IPO4	Importin-4	1	1	1	1	0	0	0	0	0	0	0	0	0	0	0	0	0	0	0	0	0	0	0	0	0	0	0	0	0	0	0	0	0	0	0	0	0	0	0	0	0	0
Q8TF71	Q8TF71	2	2	2	Monocarboxylate transporter 10	SLC16A10	Monocarboxylate transporter 10	1	2	2	2	1	2	2	1	2	2	2	2	2	2	2	1	0	0	0	0	0	0	0	0	0	0	0	0	0	0	0	0	0	0	0	0	0	0	0	0	0	0
Q8WTV0	Q8WTV0	7	7	7	Scavenger receptor class B member 1	SCARB1	Scavenger receptor class B member 1	1	7	7	7	5	7	6	6	4	6	7	6	6	5	6	5	7	6	7	7	7	7	7	7	6	6	7	5	6	6	5	5	4	6	7	5	5	5	7	6	3	3
Q8WUA8	Q8WUA8	3	3	3	Tsukushin	TSKU	Tsukushin	1	3	3	3	0	0	0	0	0	0	0	0	0	0	0	0	1	1	1	1	1	1	2	1	1	2	0	1	1	1	2	2	3	3	2	1	2	1	2	3	0	0
Q8WUJ0	Q8WUJ0	3	3	3	Serine/threonine/tyrosine-interacting protein	STYX	Serine/threonine/tyrosine-interacting protein	1	3	3	3	1	0	1	1	0	1	2	1	0	0	2	1	1	0	1	2	0	1	1	1	0	0	0	1	0	0	0	0	0	0	0	0	0	0	0	0	1	0
Q8WUM4	Q8WUM4	55	55	55	Programmed cell death 6-interacting protein	PDCD6IP	Programmed cell death 6-interacting protein	1	55	55	55	51	52	52	50	48	49	50	50	52	52	53	50	42	37	41	46	50	44	44	43	37	47	42	34	39	45	43	45	45	46	42	41	44	43	44	44	22	21
Q8WUM9	Q8WUM9	4	4	4	Sodium-dependent phosphate transporter 1	SLC20A1	Sodium-dependent phosphate transporter 1	1	4	4	4	0	1	1	0	0	2	2	3	2	2	3	1	2	1	2	2	3	1	2	1	0	1	1	0	3	4	3	4	3	4	4	4	3	4	4	4	2	1
Q8WUN7	Q8WUN7	4	4	1	Ubiquitin domain-containing protein 2	UBTD2	Ubiquitin domain-containing protein 2	1	4	4	1	3	3	4	3	3	3	3	4	3	2	3	2	0	1	0	1	0	0	0	0	0	0	0	0	0	0	0	0	0	0	0	0	0	0	0	0	0	1
Q8WUW1	Q8WUW1	2	2	2	Protein BRICK1	BRK1	Protein BRICK1	1	2	2	2	2	2	2	2	2	2	2	2	2	2	2	1	1	1	0	1	1	1	1	0	1	1	1	1	0	0	0	1	0	0	0	0	0	0	0	0	0	0
Q8WUX1	Q8WUX1	1	1	1	Sodium-coupled neutral amino acid transporter 5	SLC38A5	Sodium-coupled neutral amino acid transporter 5	1	1	1	1	1	1	0	1	1	1	1	1	1	0	0	1	1	1	1	1	1	1	1	1	1	1	1	1	0	0	0	0	0	0	0	0	0	0	0	0	0	0
Q8WUY1	Q8WUY1	4	4	4	Protein THEM6	THEM6	Protein THEM6	1	4	4	4	0	1	0	0	0	0	0	0	0	0	0	0	3	3	3	4	3	4	3	3	3	3	3	3	2	2	1	1	1	1	0	2	1	3	1	1	2	1
Q8WV19	Q8WV19	1	1	1	Vesicle transport protein SFT2A	SFT2D1	Vesicle transport protein SFT2A	1	1	1	1	1	0	1	1	0	1	1	1	1	0	0	0	0	0	0	0	1	0	0	0	0	0	0	0	1	0	0	1	1	0	1	0	1	1	0	0	0	0
Q8WV92	Q8WV92	11	11	11	MIT domain-containing protein 1	MITD1	MIT domain-containing protein 1	1	11	11	11	9	10	10	8	9	10	9	10	11	11	11	11	4	2	3	2	2	2	2	2	2	2	3	2	1	0	1	2	1	2	2	0	0	0	1	3	1	0
Q8WVJ2	Q8WVJ2	2	2	2	NudC domain-containing protein 2	NUDCD2	NudC domain-containing protein 2	1	2	2	2	0	0	1	0	0	0	0	1	0	0	0	0	2	1	0	1	1	1	1	1	0	1	0	0	0	0	0	0	0	0	0	0	0	0	0	0	0	0
Q8WVQ1	Q8WVQ1	4	4	4	Soluble calcium-activated nucleotidase 1	CANT1	Soluble calcium-activated nucleotidase 1	1	4	4	4	1	0	0	0	0	0	1	0	0	0	0	0	2	1	2	4	4	1	3	4	2	4	3	1	0	0	0	0	0	0	0	0	0	0	0	0	1	1
Q8WVV4	Q8WVV4	2	2	2	Protein POF1B	POF1B	Protein POF1B	1	2	2	2	2	1	2	2	2	1	0	1	2	1	1	2	0	0	0	0	0	1	0	1	0	1	0	1	0	0	0	0	0	0	0	0	0	0	1	0	0	0
Q8WVX9	Q8WVX9	5	5	5	Fatty acyl-CoA reductase 1	FAR1	Fatty acyl-CoA reductase 1	1	5	5	5	0	0	0	0	0	0	0	0	0	1	0	0	1	0	1	2	2	1	1	1	1	1	1	1	2	1	1	0	0	0	1	2	2	1	1	0	4	3
Q8WWI5	Q8WWI5	13	13	13	Choline transporter-like protein 1	SLC44A1	Choline transporter-like protein 1	1	13	13	13	13	12	13	12	13	12	12	12	13	13	11	13	9	6	10	10	7	10	10	9	9	10	8	10	11	11	10	11	12	10	10	9	10	10	10	11	3	3
Q8WXI7	Q8WXI7	14	14	14	Mucin-16	MUC16	Mucin-16	1	14	14	14	1	1	1	1	1	1	1	1	1	1	1	1	0	1	0	0	1	1	1	0	1	0	2	2	8	7	8	7	6	8	9	6	7	9	6	6	2	4
Q8WY07	Q8WY07	2	2	2	Cationic amino acid transporter 3	SLC7A3	Cationic amino acid transporter 3	1	2	2	2	2	1	2	0	2	2	2	2	2	2	2	2	0	0	0	0	0	0	0	0	1	0	0	0	0	0	0	0	0	0	0	1	0	0	0	0	0	0
Q8WY22	Q8WY22	2	2	2	BRI3-binding protein	BRI3BP	BRI3-binding protein	1	2	2	2	0	1	1	0	1	1	1	2	1	0	1	2	2	1	2	2	2	2	2	2	2	2	2	1	2	0	0	0	0	1	0	0	0	0	1	1	1	1
Q8WZ42	Q8WZ42	19	19	19	Titin	TTN	Titin	1	19	19	19	2	2	2	2	14	2	2	2	1	2	3	2	3	5	4	3	3	4	4	2	3	3	3	3	3	3	3	2	2	4	3	2	2	4	4	2	0	0
Q92485	Q92485	8	8	8	Acid sphingomyelinase-like phosphodiesterase 3b	SMPDL3B	Acid sphingomyelinase-like phosphodiesterase 3b	1	8	8	8	6	6	8	7	7	7	6	7	8	5	6	7	4	4	3	5	5	4	3	3	4	4	4	3	4	5	3	4	4	5	6	3	5	6	4	6	3	2
Q92499	Q92499	3	3	3	ATP-dependent RNA helicase DDX1	DDX1	ATP-dependent RNA helicase DDX1	1	3	3	3	1	2	1	0	0	0	2	2	2	0	2	1	1	0	1	1	2	1	1	2	2	2	1	0	2	2	2	2	1	2	0	2	1	1	2	1	0	0
Q92508	Q92508	3	3	3	Piezo-type mechanosensitive ion channel component 1	PIEZO1	Piezo-type mechanosensitive ion channel component 1	1	3	3	3	0	0	0	0	0	0	0	0	0	0	0	0	1	1	1	1	1	1	1	1	1	1	1	1	0	0	1	1	1	1	0	0	0	0	2	1	2	2
Q92520	Q92520	7	7	7	Protein FAM3C	FAM3C	Protein FAM3C	1	7	7	7	1	4	4	1	1	2	3	3	2	3	2	3	5	5	4	5	6	5	5	5	7	7	5	4	6	5	3	3	2	3	5	4	3	3	5	2	4	4
[truncated: 633 more rows]
[truncated: 561 more columns]

## Sheet: Tab. S2
Accession	Gene	Name
A3KMH1	VWA8	von Willebrand factor A domain containing 8
A4D2G3	OR2A25	olfactory receptor family 2 subfamily A member 25
C9J7I0	UMAD1	UBAP1-MVB12-associated (UMA) domain containing 1
O00180	KCNK1	potassium two pore domain channel subfamily K member 1
O00559	EBAG9	estrogen receptor binding site associated antigen 9
O14495	PLPP3	phospholipid phosphatase 3
Q5TA81	LCE2C	late cornified envelope 2C
O14745	NHERF1	NHERF family PDZ scaffold protein 1
O43504	LAMTOR5	late endosomal/lysosomal adaptor, MAPK and MTOR activator 5
O43768	ENSA	endosulfine alpha
O43776	NARS1	asparaginyl-tRNA synthetase 1
O43826	SLC37A4	solute carrier family 37 member 4
O60232	ZNRD2	zinc ribbon domain containing 2
O60613	SELENOF	selenoprotein F
O60636	TSPAN2	tetraspanin 2
Q99879	H2BC14	H2B clustered histone 14
O75063	FAM20B	FAM20B glycosaminoglycan xylosylkinase
O75367	MACROH2A1	macroH2A.1 histone
O75947	ATP5PD	ATP synthase peripheral stalk subunit d
O94826	TOMM70	translocase of outer mitochondrial membrane 70
O94991	SLITRK5	SLIT and NTRK like family member 5
O95163	ELP1	elongator acetyltransferase complex subunit 1
O95864	FADS2	fatty acid desaturase 2
P00395	COX1	cytochrome c oxidase subunit I
P04062	GBA1	glucosylceramidase beta 1
P04070	PROC	protein C, inactivator of coagulation factors Va and VIIIa
P06576	ATP5F1B	ATP synthase F1 subunit beta
Q16778	H2BC21	H2B clustered histone 21
P07814	EPRS1	glutamyl-prolyl-tRNA synthetase 1
Q71UI9	H2AZ2	H2A.Z variant histone 2
Q99878	H2AC14	H2A clustered histone 14
P14373	TRIM27	tripartite motif containing 27
P14868	DARS1	aspartyl-tRNA synthetase 1
P16104	H2AX	H2A.X variant histone
P18859	ATP5PF	ATP synthase peripheral stalk subunit F6
P19237	TNNI1	troponin I1, slow skeletal type
P22532	SPRR2D	small proline rich protein 2D
P23381	WARS1	tryptophanyl-tRNA synthetase 1
P23771	GATA3	GATA binding protein 3
P24539	ATP5PB	ATP synthase peripheral stalk-membrane subunit b
P25106	ACKR3	atypical chemokine receptor 3
P25705	ATP5F1A	ATP synthase F1 subunit alpha
P26639	TARS1	threonyl-tRNA synthetase 1
P26640	VARS1	valyl-tRNA synthetase 1
P30049	ATP5F1D	ATP synthase F1 subunit delta
P30520	ADSS2	adenylosuccinate synthase 2
P35232	PHB1	prohibitin 1
P36542	ATP5F1C	ATP synthase F1 subunit gamma
P41250	GARS1	glycyl-tRNA synthetase 1
P41252	IARS1	isoleucyl-tRNA synthetase 1
P47897	QARS1	glutaminyl-tRNA synthetase 1
P48047	ATP5PO	ATP synthase peripheral stalk subunit OSCP
P49588	AARS1	alanyl-tRNA synthetase 1
P49591	SARS1	seryl-tRNA synthetase 1
P49711	CTCF	CCCTC-binding factor
P51589	CYP2J2	cytochrome P450 family 2 subfamily J member 2
P54136	RARS1	arginyl-tRNA synthetase 1
P54577	YARS1	tyrosyl-tRNA synthetase 1
P55196	AFDN	afadin, adherens junction formation factor
P56134	ATP5MF	ATP synthase membrane subunit f
P56192	MARS1	methionyl-tRNA synthetase 1
P56385	ATP5ME	ATP synthase membrane subunit e
P62805	H4C9	H4 clustered histone 9
P63244	RACK1	receptor for activated C kinase 1
P68431	H3C1	H3 clustered histone 1
P82663	MRPS25	mitochondrial ribosomal protein S25
P84243	H3-3A	H3.3 histone A
Q00872	MYBPC1	myosin binding protein C1
Q13585	GPR50	G protein-coupled receptor 50
Q13794	PMAIP1	phorbol-12-myristate-13-acetate-induced protein 1
Q14141	SEPTIN6	septin 6
Q14168	MPP2	MAGUK p55 scaffold protein 2
Q14534	SQLE	squalene epoxidase
Q14696	MESD	mesoderm development LRP chaperone
Q15019	SEPTIN2	septin 2
Q15046	KARS1	lysyl-tRNA synthetase 1
Q15118	PDK1	pyruvate dehydrogenase kinase 1
Q15370	ELOB	elongin B
Q15397	PUM3	pumilio RNA binding family member 3
Q15599	NHERF2	NHERF family PDZ scaffold protein 2
Q16181	SEPTIN7	septin 7
Q16777	H2AC20	H2A clustered histone 20
Q2M389	WASHC4	WASH complex subunit 4
Q4G0N4	NADK2	NAD kinase 2, mitochondrial
Q53S08	RAB6D	RAB6D, member RAS oncogene family
Q5JTJ3	COA6	cytochrome c oxidase assembly factor 6
Q5T7M9	DIPK1A	divergent protein kinase domain 1A
Q5U623	ATF7IP2	activating transcription factor 7 interacting protein 2
Q66PJ3	ARL6IP4	ADP ribosylation factor like GTPase 6 interacting protein 4
Q68CZ6	HAUS3	HAUS augmin like complex subunit 3
Q6NUJ1	PSAPL1	prosaposin like 1
Q6P9B6	MEAK7	MTOR associated protein, eak-7 homolog
Q6QHC5	DEGS2	delta 4-desaturase, sphingolipid 2
Q6UXD5	SEZ6L2	seizure related 6 homolog like 2
Q6UXG2	ELAPOR1	endosome-lysosome associated apoptosis and autophagy regulator 1
Q6UXH1	CRELD2	cysteine rich with EGF like domains 2
Q71DI3	H3C14	H3 clustered histone 14
Q7L0Y3	TRMT10C	tRNA methyltransferase 10C, mitochondrial RNase P subunit
Q7Z2Q7	LRRC70	leucine rich repeat containing 70
Q86T03	PIP4P1	phosphatidylinositol-4,5-bisphosphate 4-phosphatase 1
Q86WV6	STING1	stimulator of interferon response cGAMP interactor 1
Q8IYI8	ZNF440	zinc finger protein 440
Q8N0X7	SPART	spartin
Q8N118	CYP4X1	cytochrome P450 family 4 subfamily X member 1
Q8N257	H2BC26	H2B clustered histone 26
Q8N3R9	PALS1	protein associated with LIN7 1, MAGUK p55 family member
Q8N427	NME8	NME/NM23 family member 8
Q8N895	ZNF366	zinc finger protein 366
Q8N8E3	CEP112	centrosomal protein 112
Q8N9C0	IGSF22	immunoglobulin superfamily member 22
Q8NBA8	DTWD2	DTW domain containing 2
Q8NCW5	NAXE	NAD(P)HX epimerase
Q8TEB1	DCAF11	DDB1 and CUL4 associated factor 11
Q8WUJ0	STYX	serine/threonine/tyrosine interacting protein
Q92616	GCN1	GCN1 activator of EIF2AK4
Q92692	NECTIN2	nectin cell adhesion molecule 2
Q93077	H2AC6	H2A clustered histone 6
Q96A32	MYL11	myosin light chain 11
[truncated: 52 more rows]

## Sheet: Tab. S3
Accession	Gene	Name	E_MDA	MV_MDA	E_MCF7	MV_MCF7	E_MCF10A	MV_MCF10A	Single-pass membrane protein	Multi-pass membrane protein
[truncated: 44 more rows]

[truncated: 6 more sheets: Tab. S4, Tab. S5, Tab. S6, Tab. S7, Tab. S8, Tab. S9]
